# Supplementary material
Source: bioRxiv or medRxiv preprint supplement (https://www.biorxiv.org/highwire/filestream/19546/field_highwire_adjunct_files/0/062455-1.pdf)

*Blattella germanica*

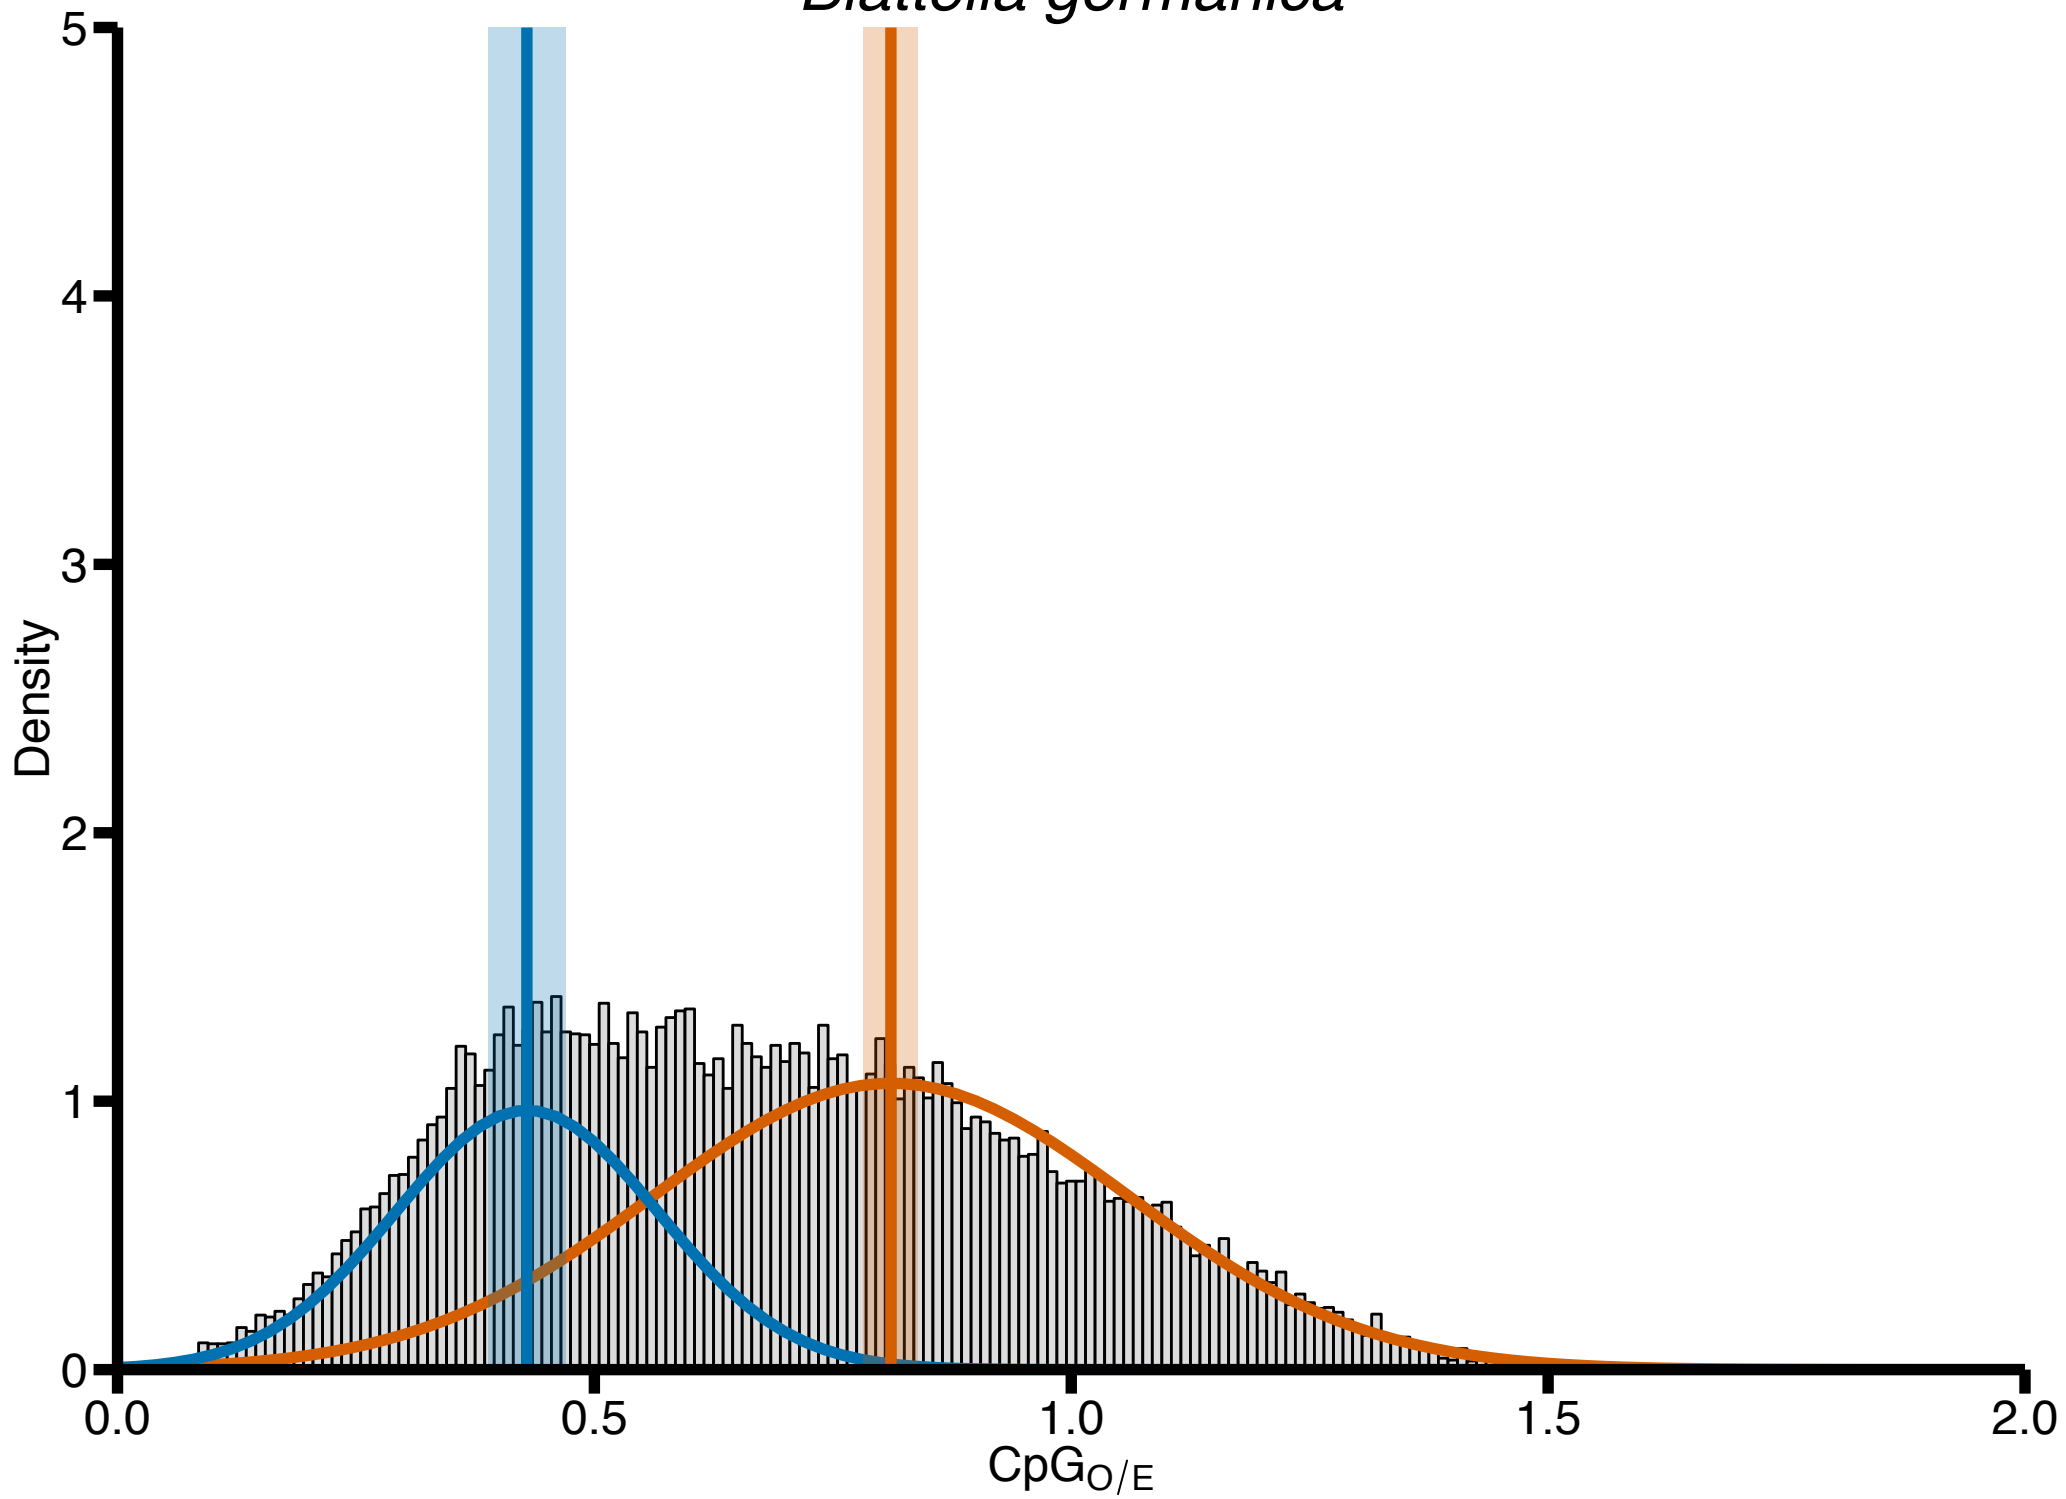

*Agrilus planipennis*

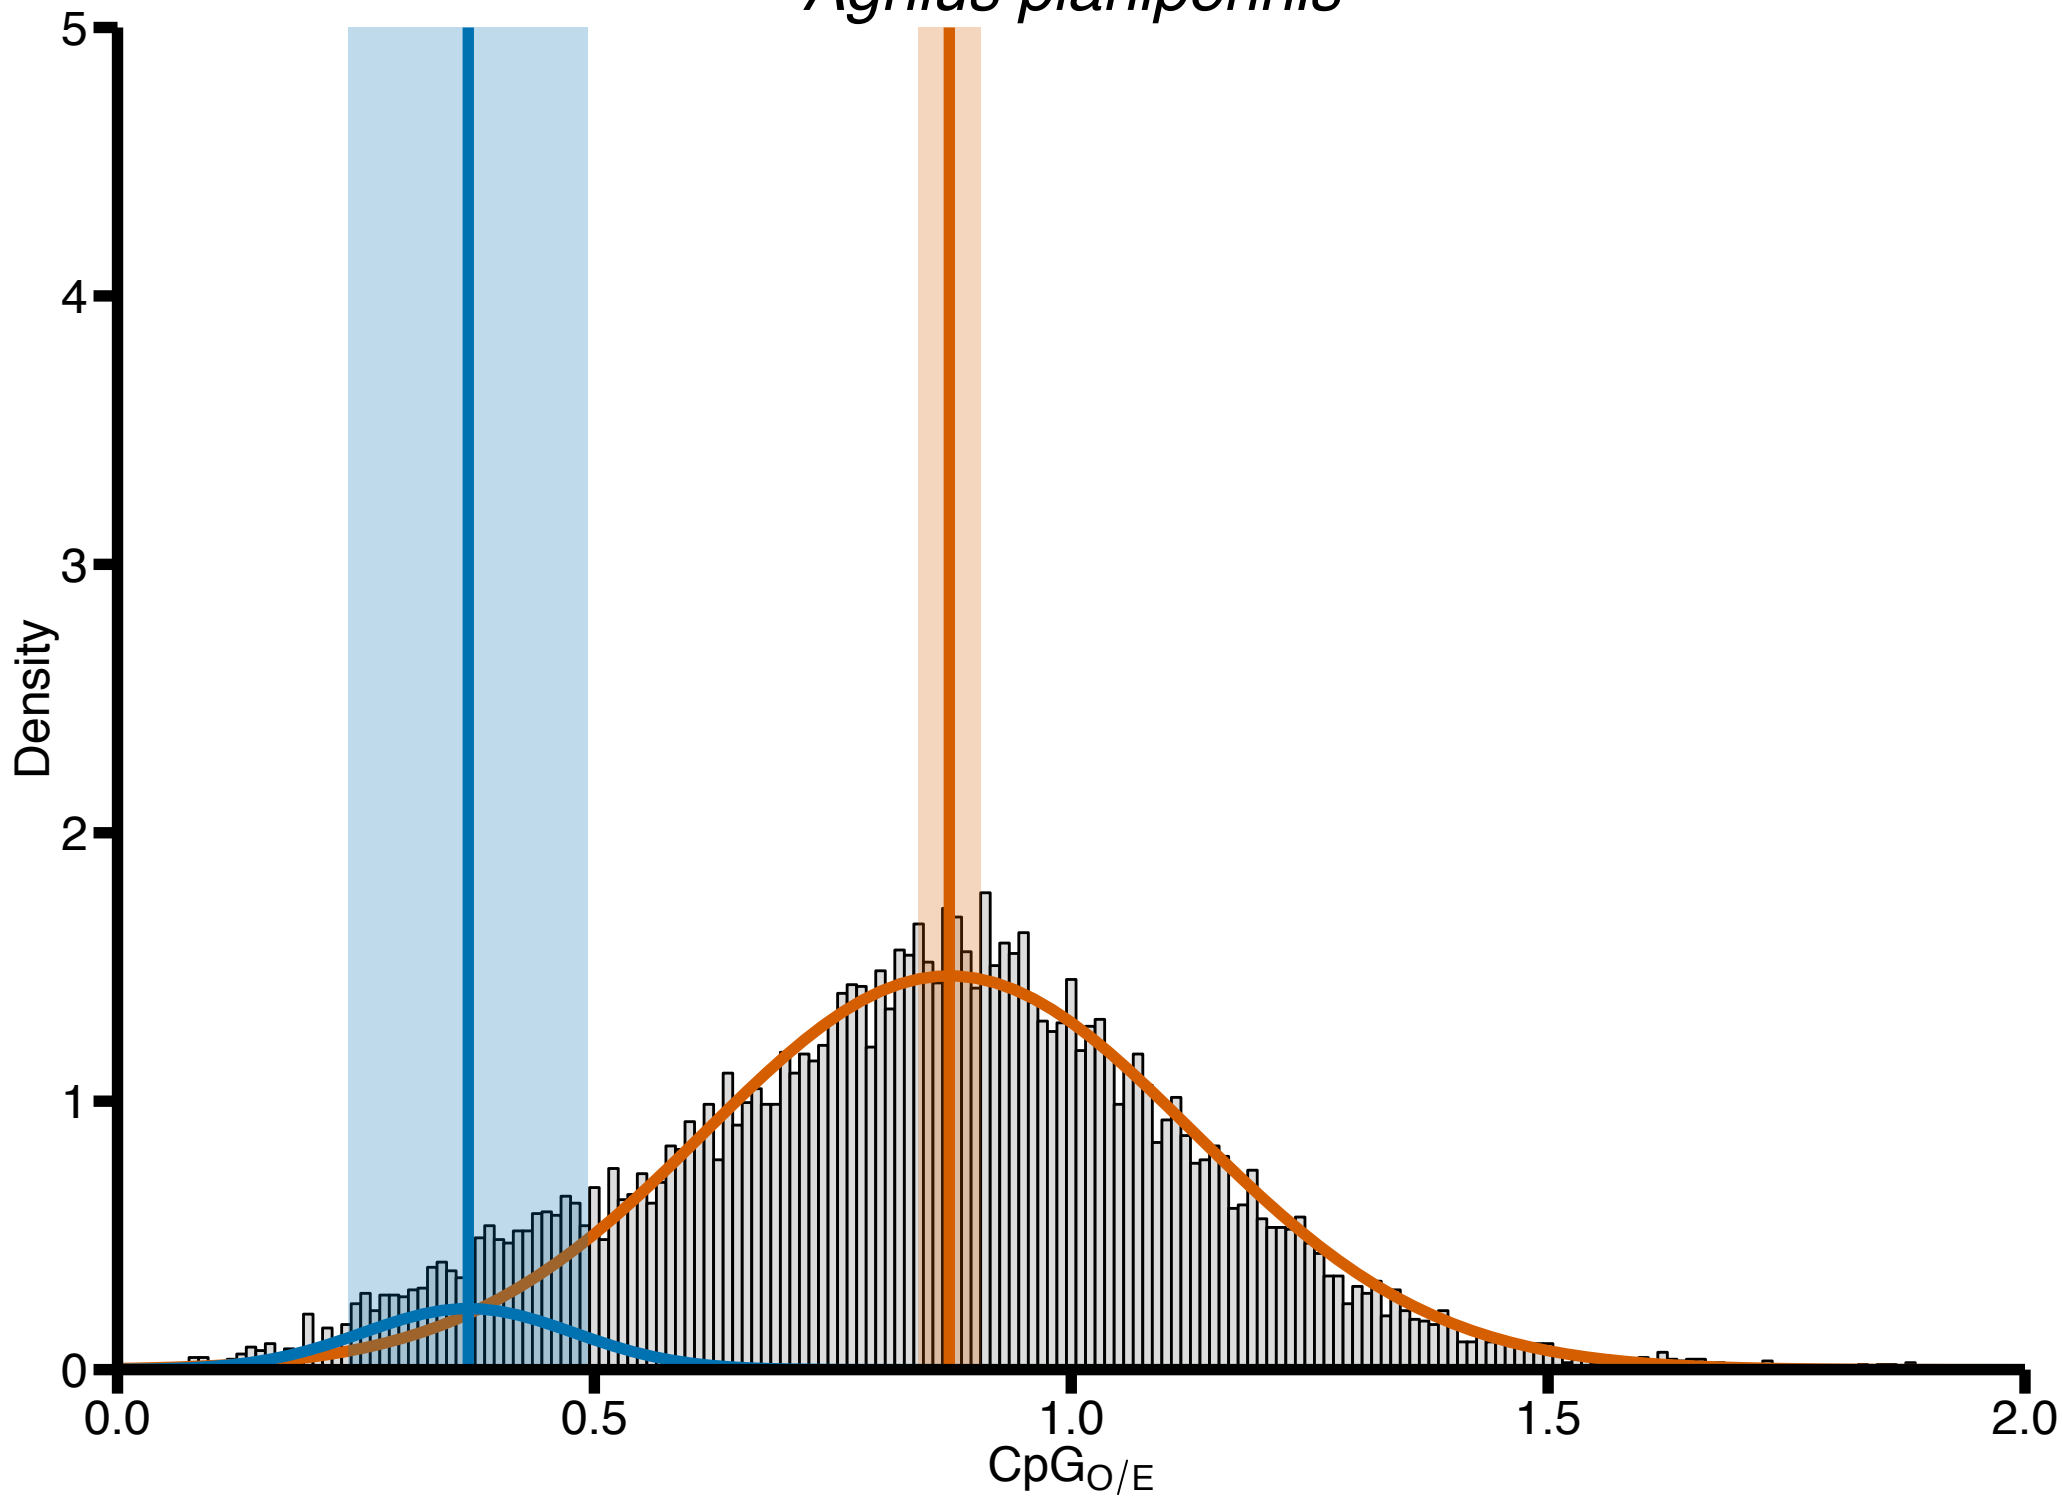

*Anoplophora glabripennis*

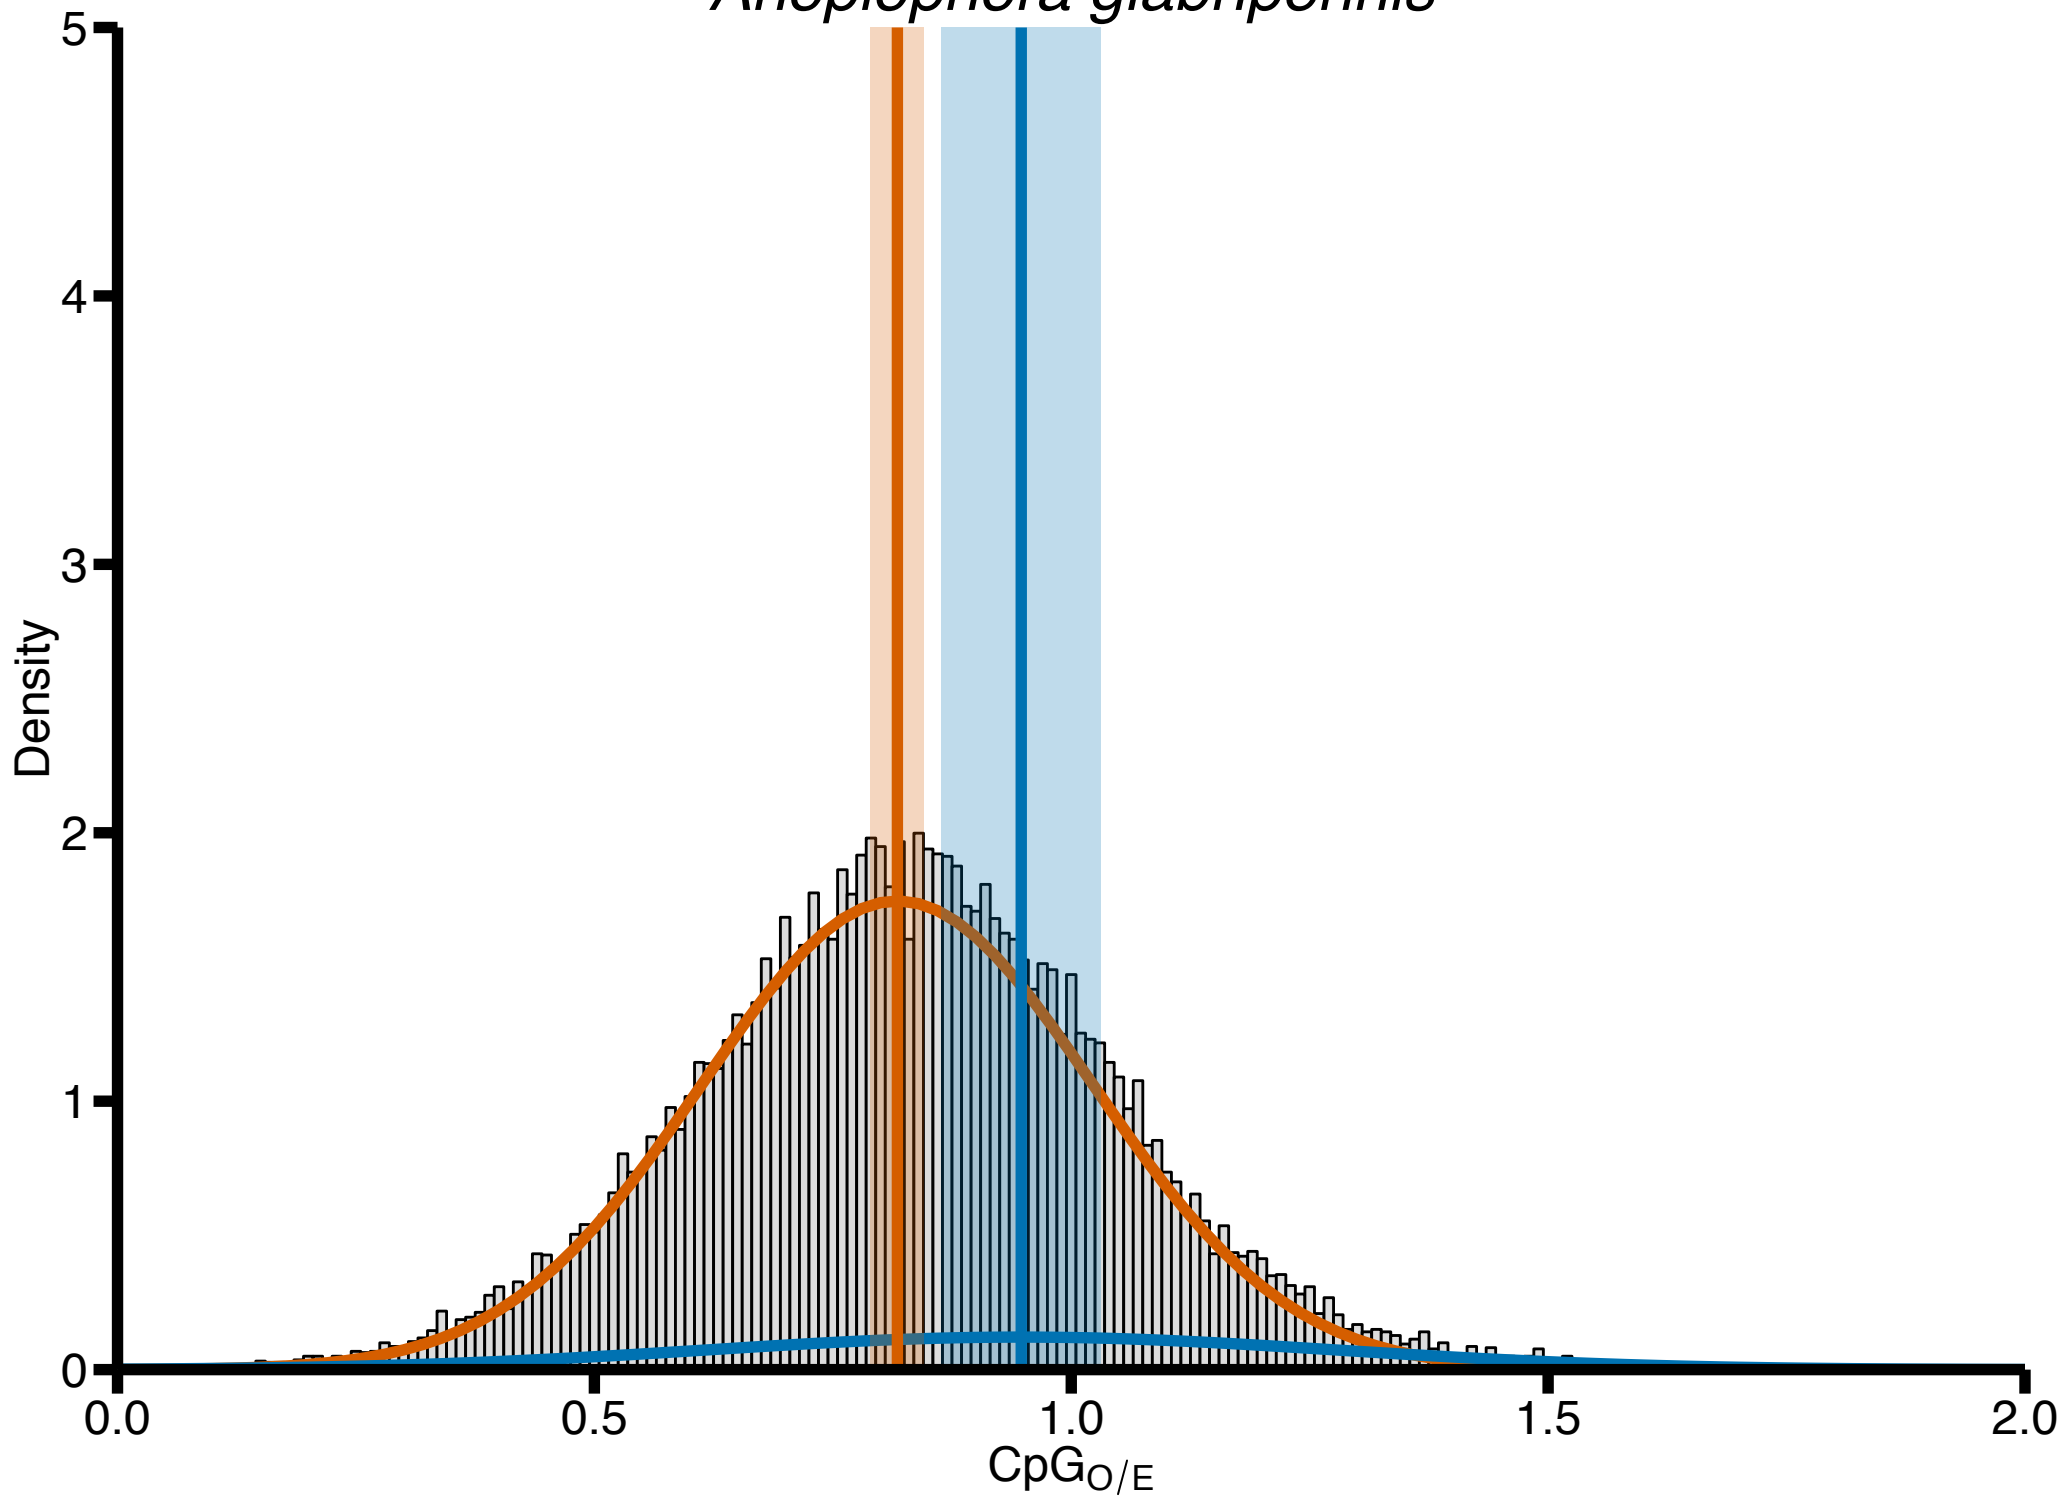

*Dendroctonus ponderosae*

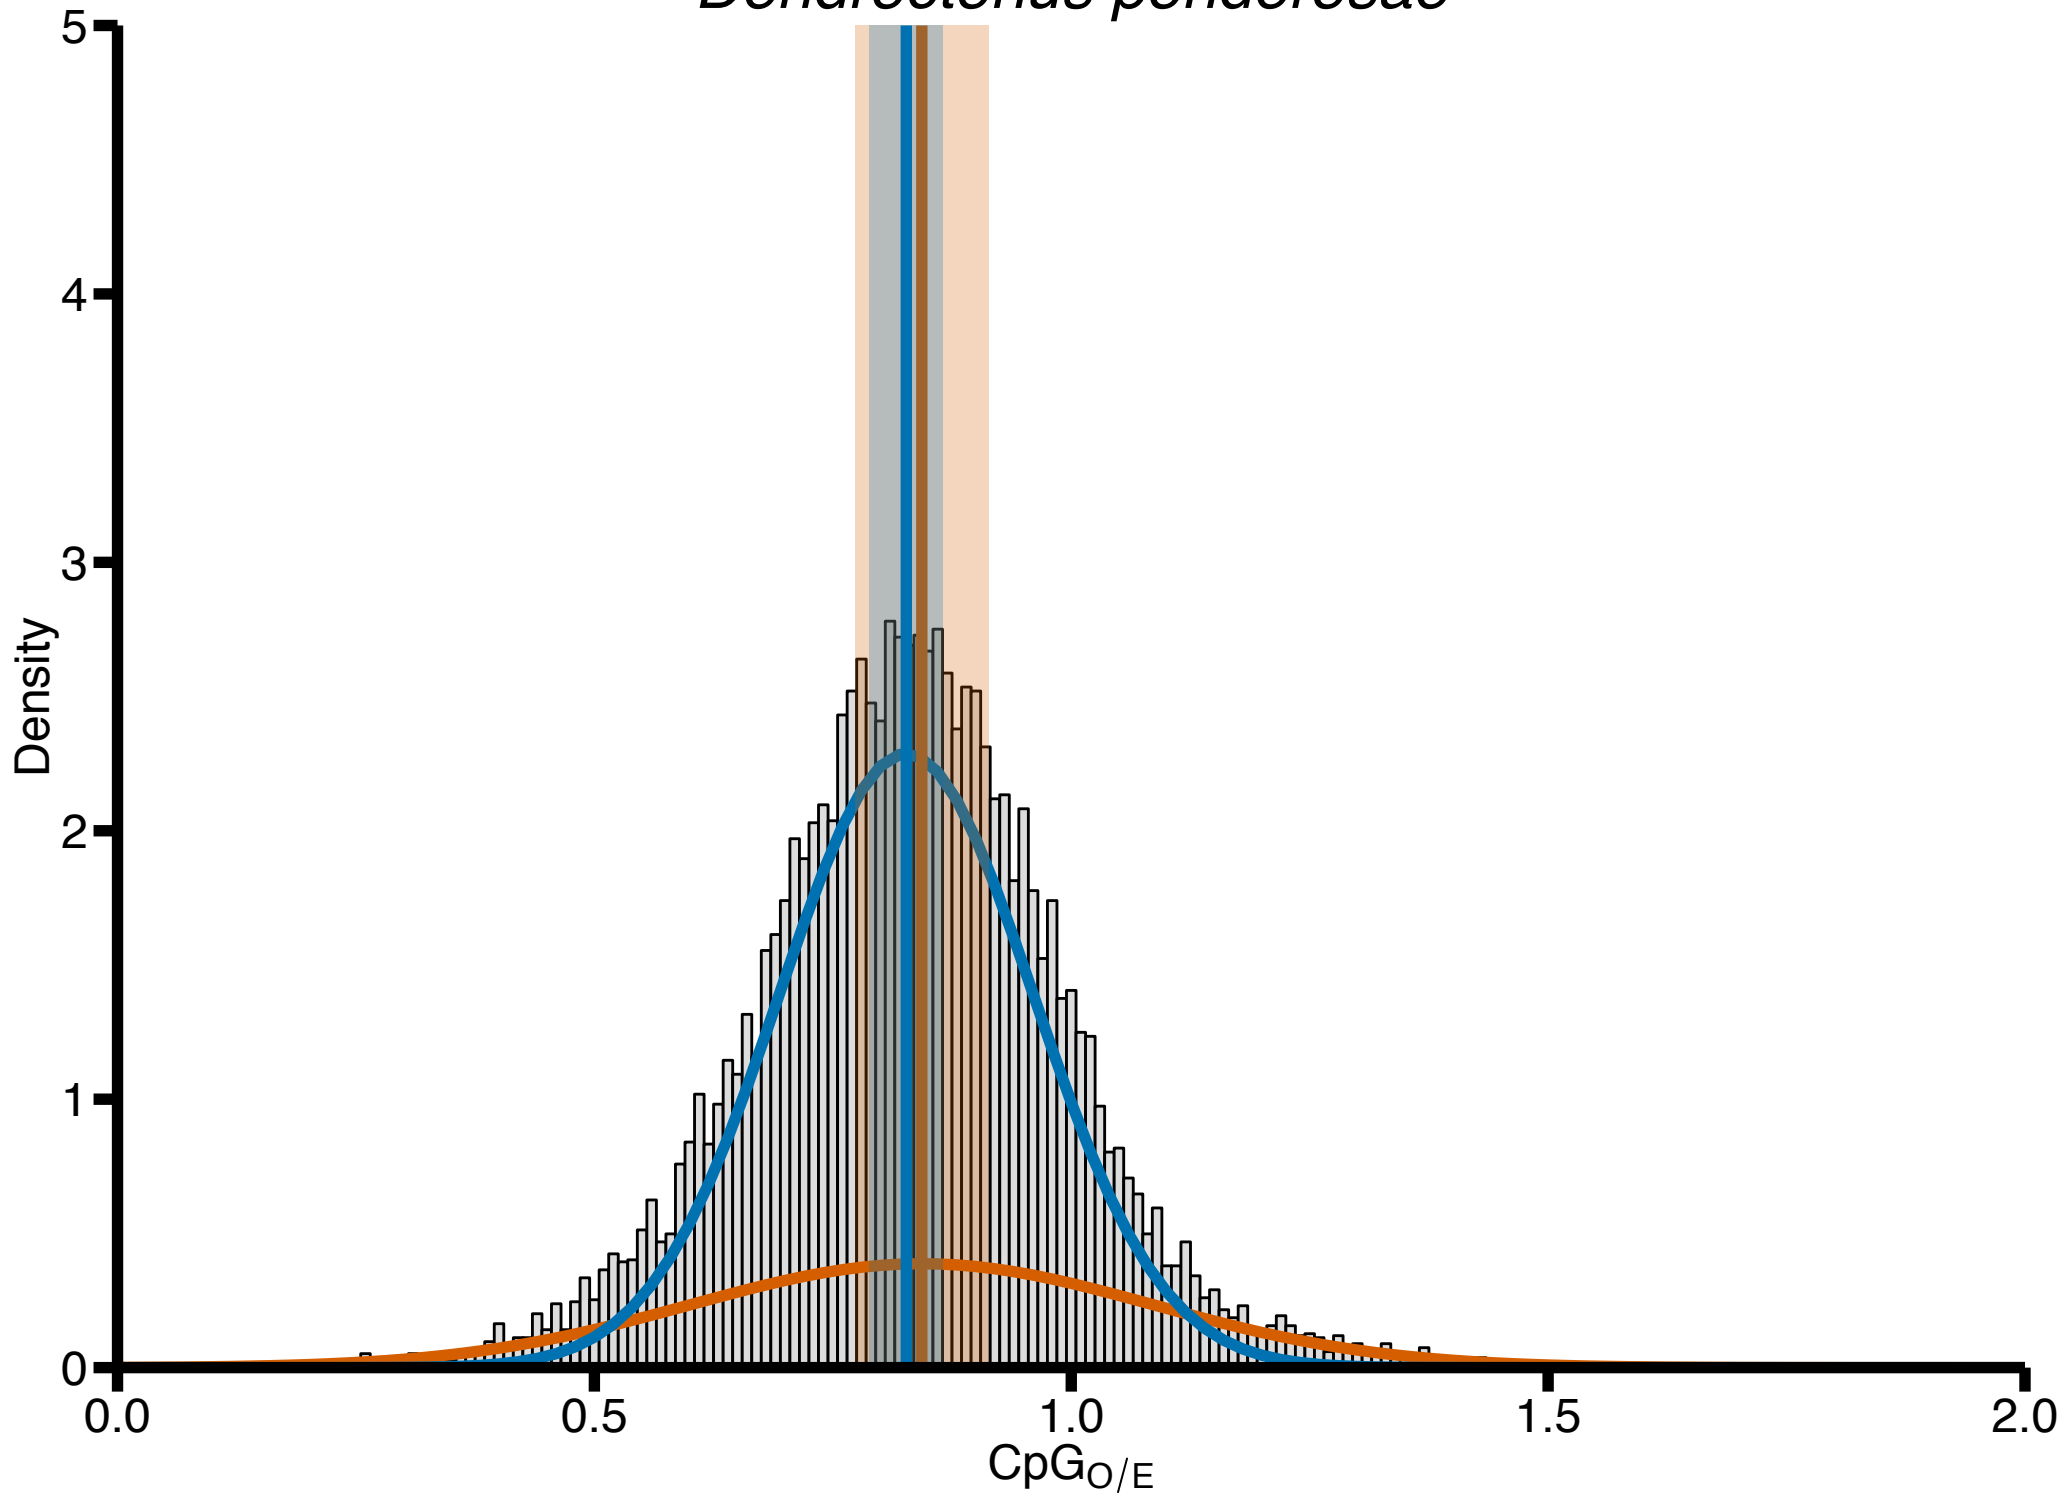

*Leptinotarsa decemlineata*

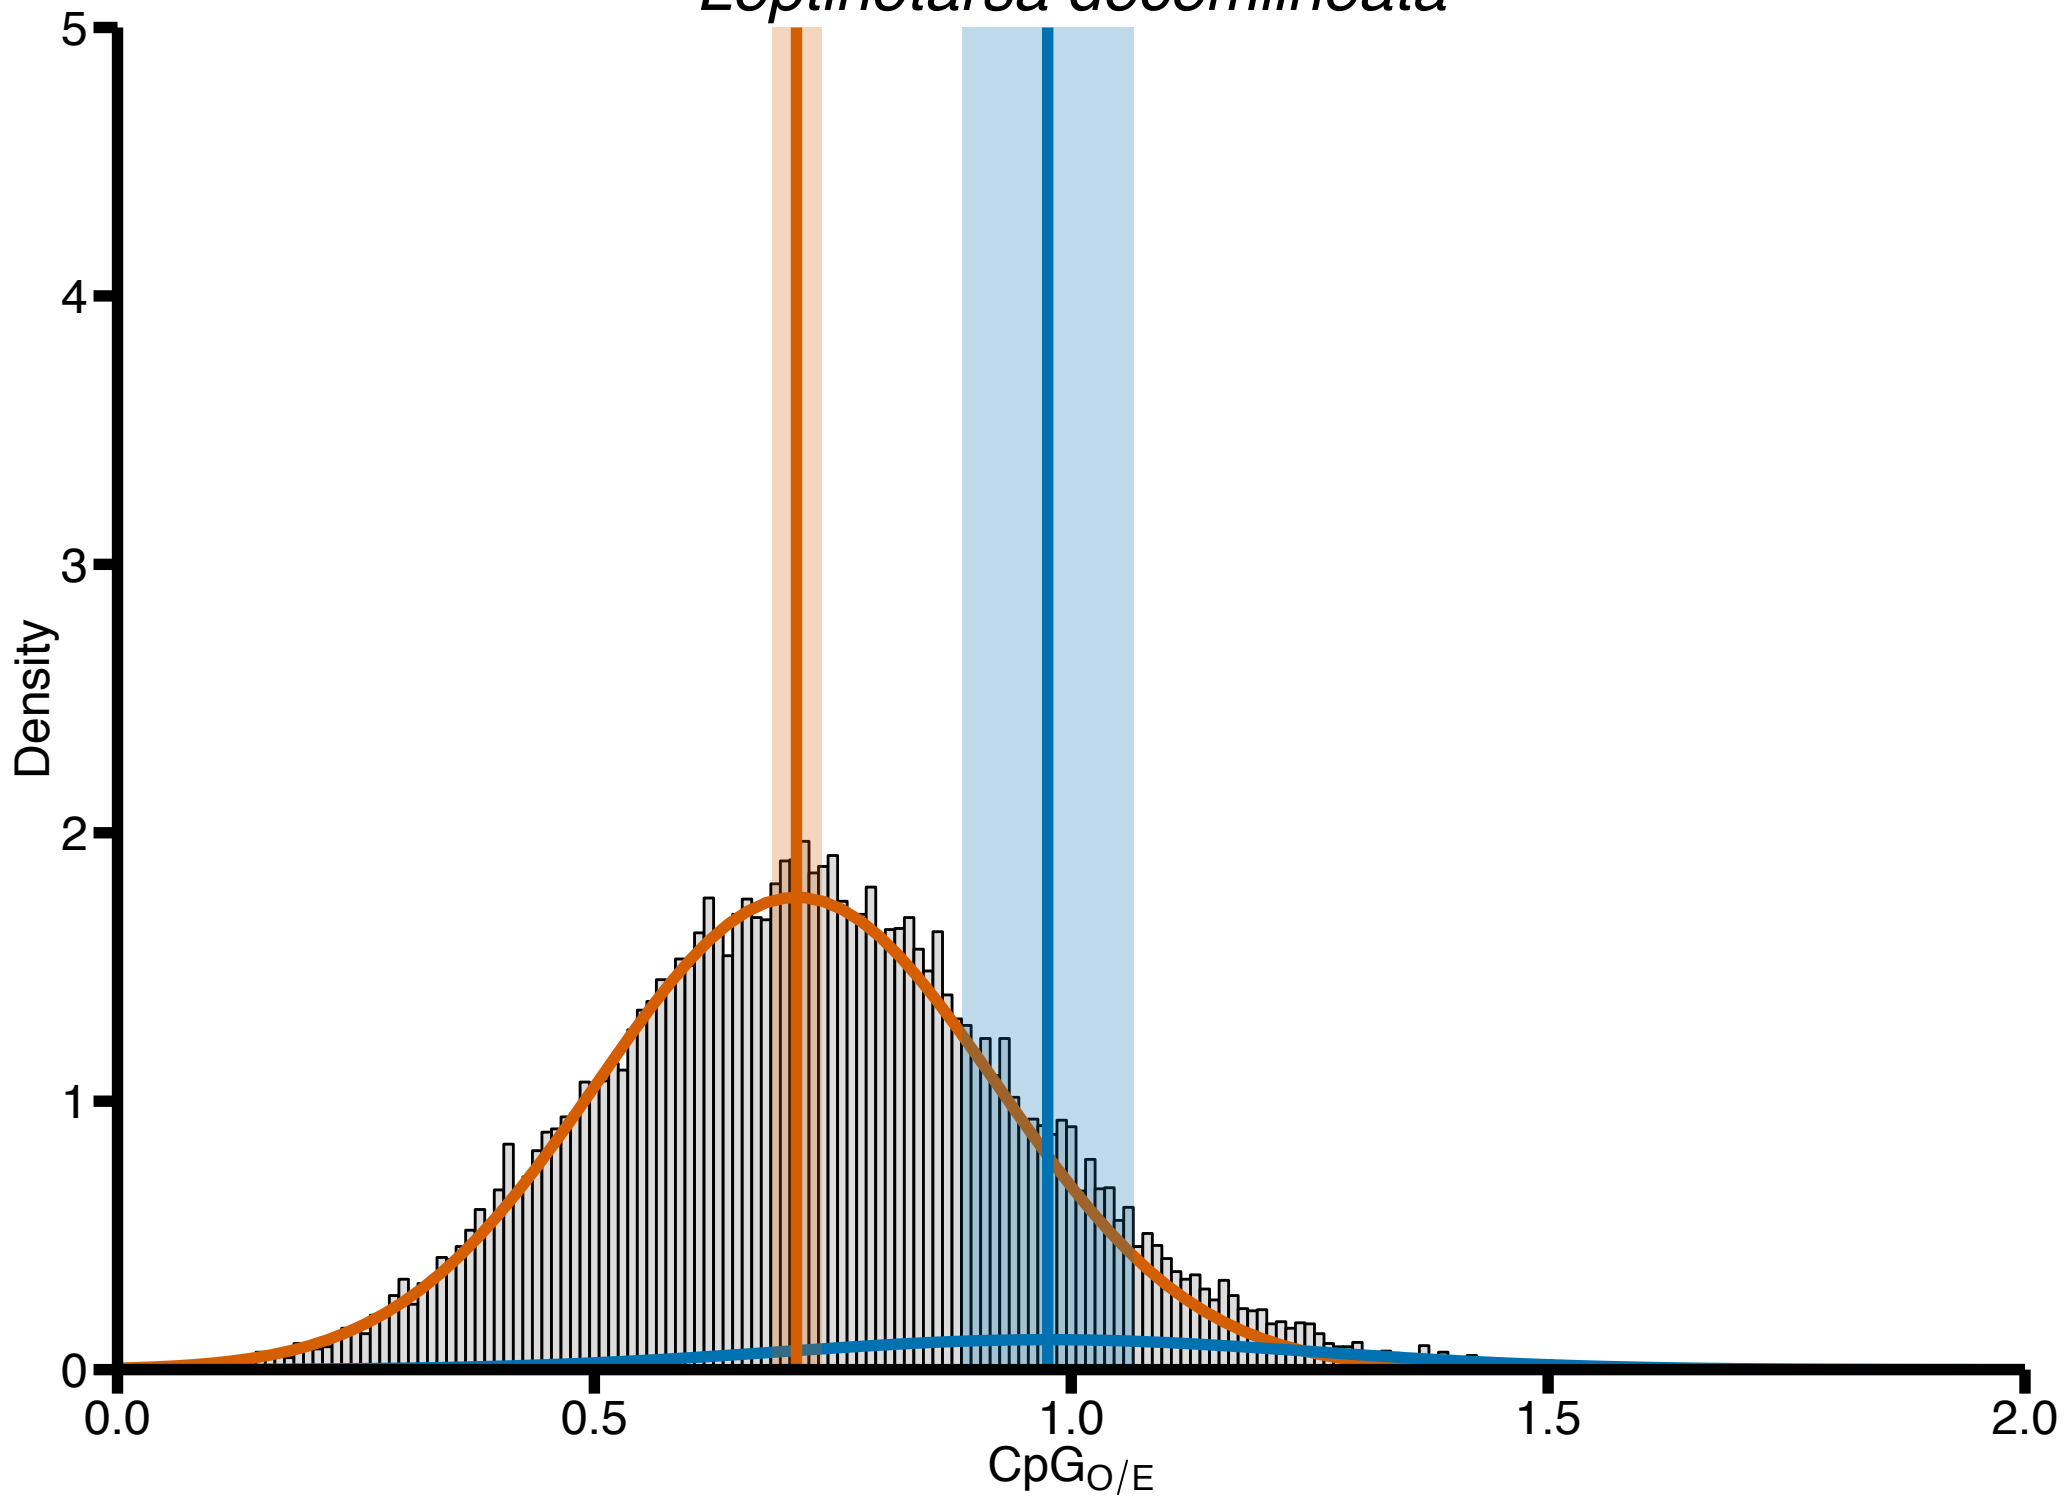

*Nicrophorus vespilloides*

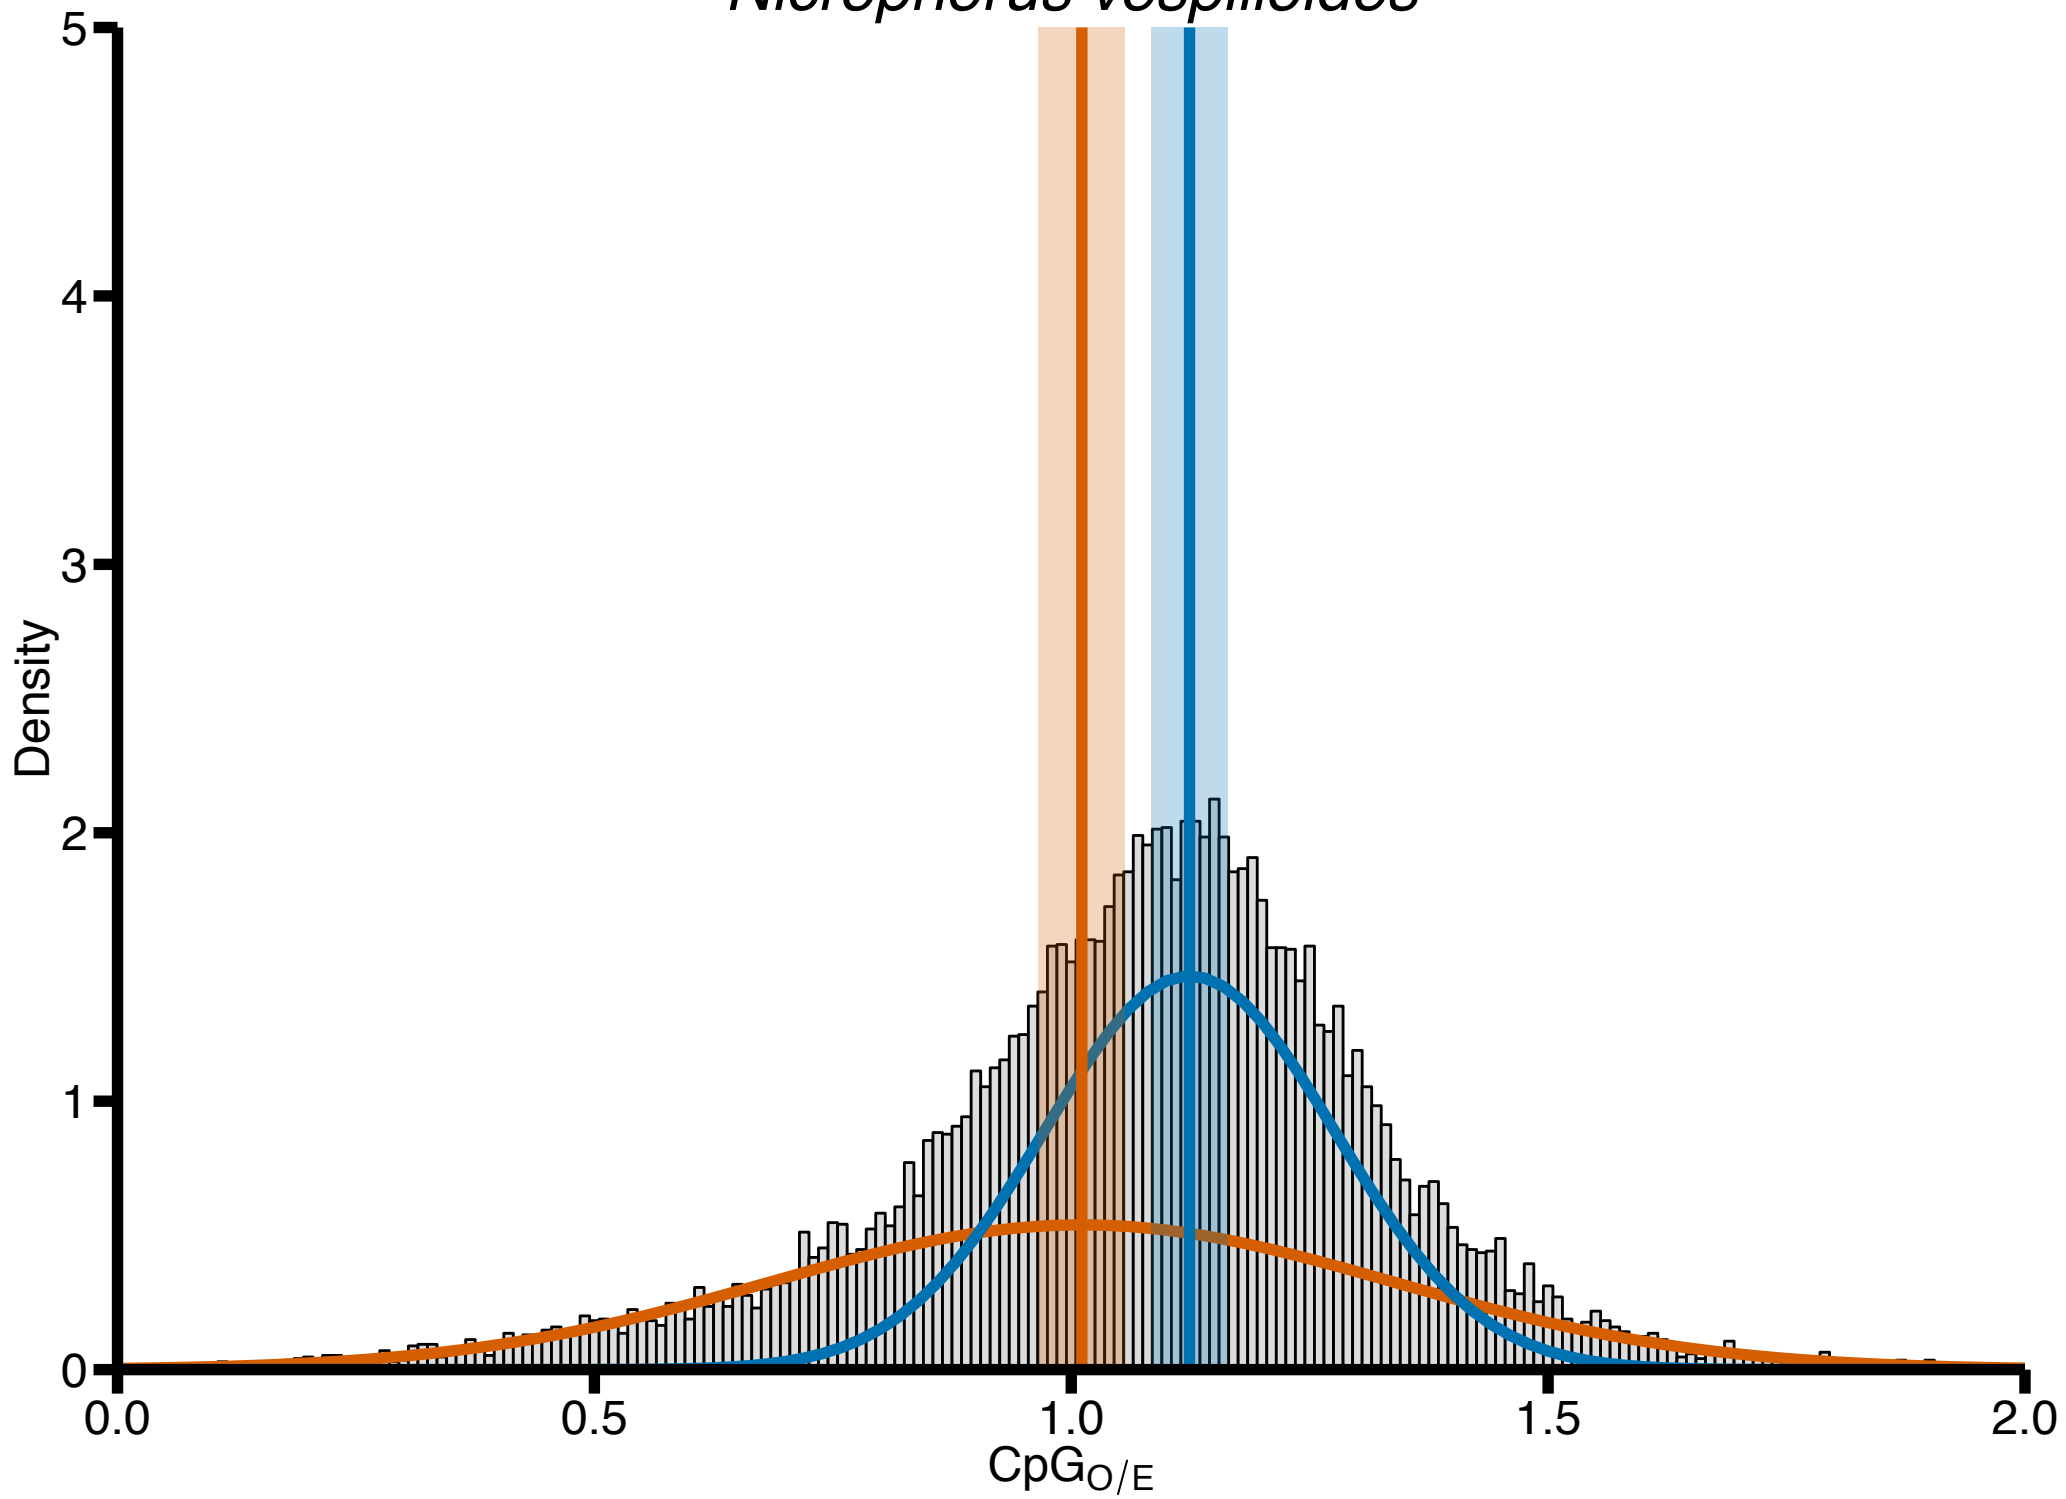

*Onthophagus taurus*

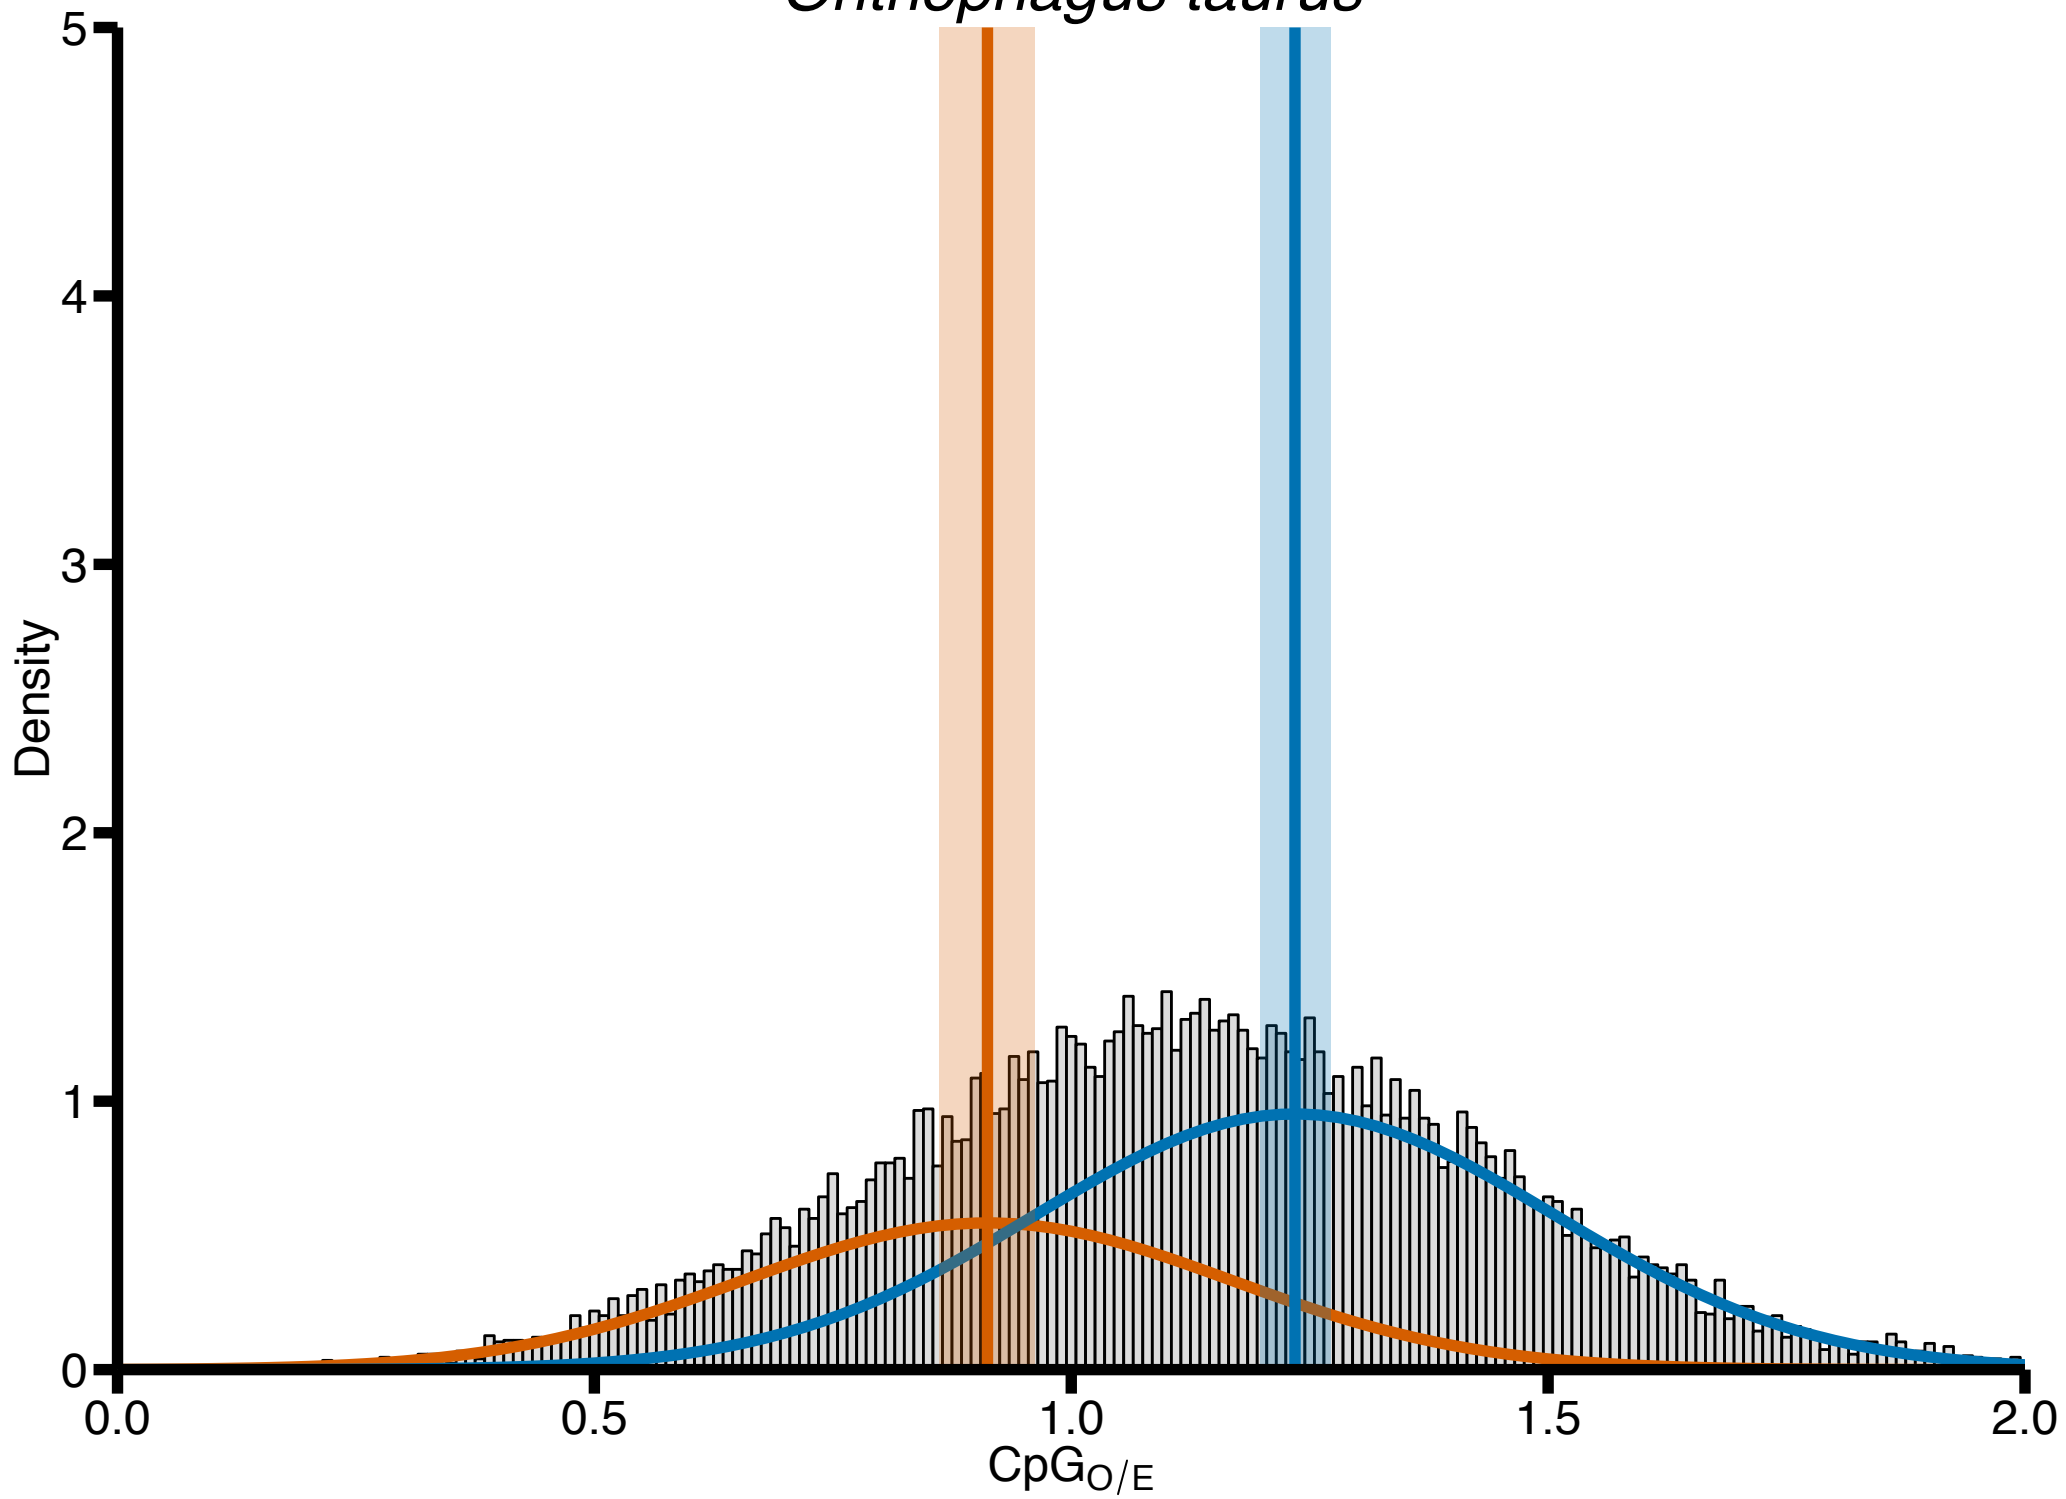

*Tribolium castaneum*

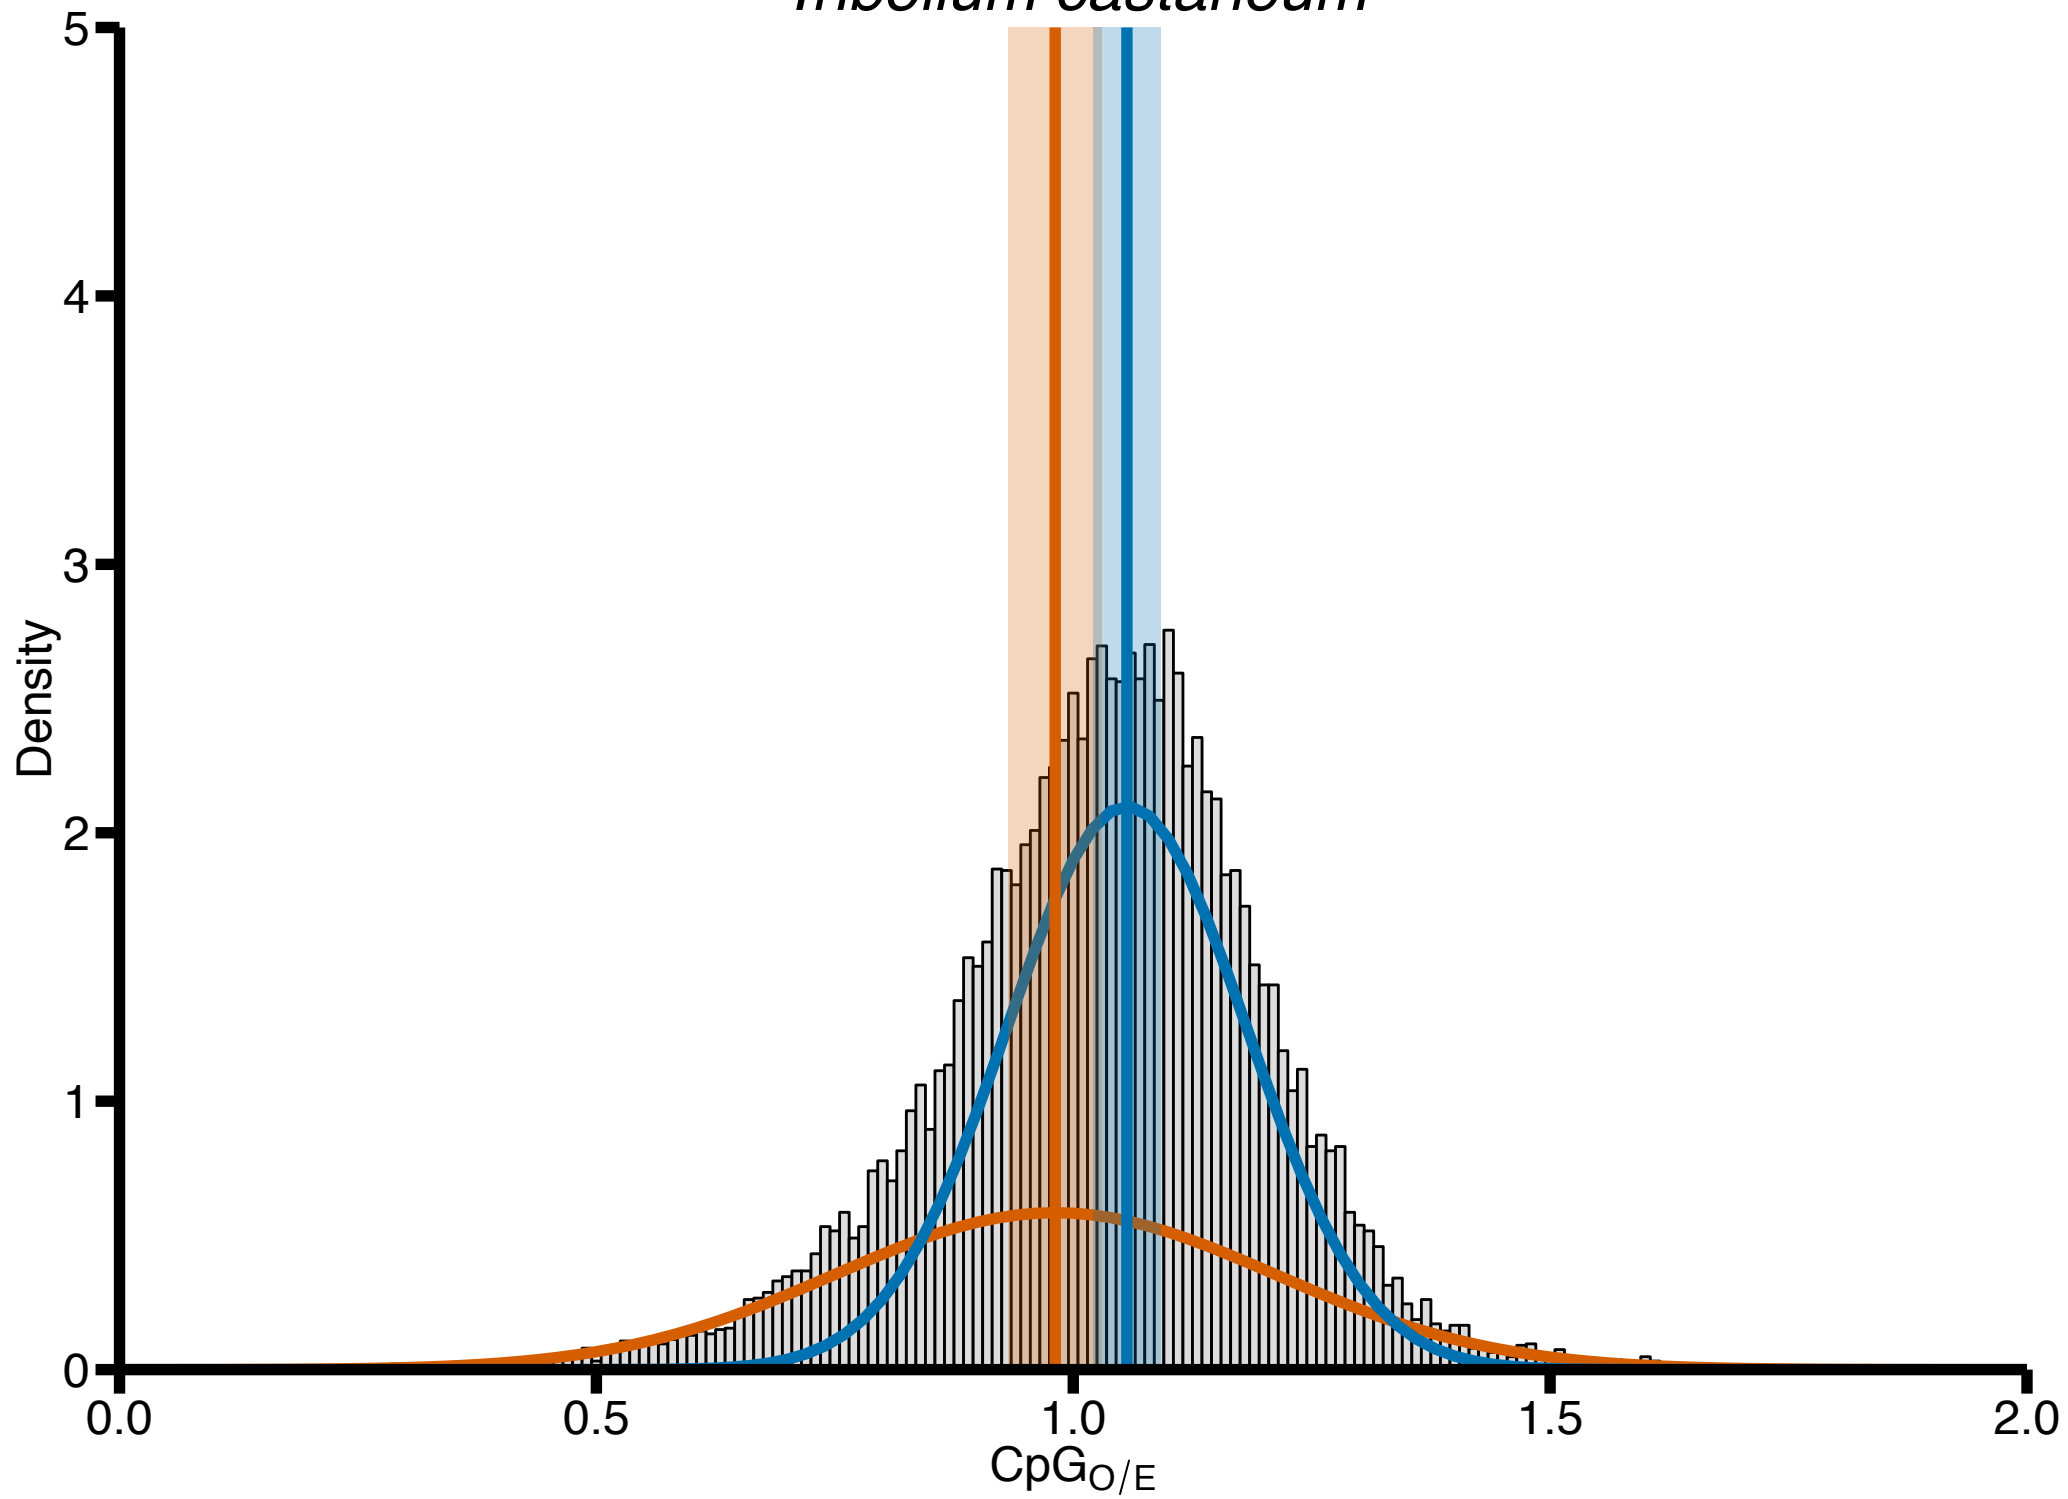



*Daphnia pulex*

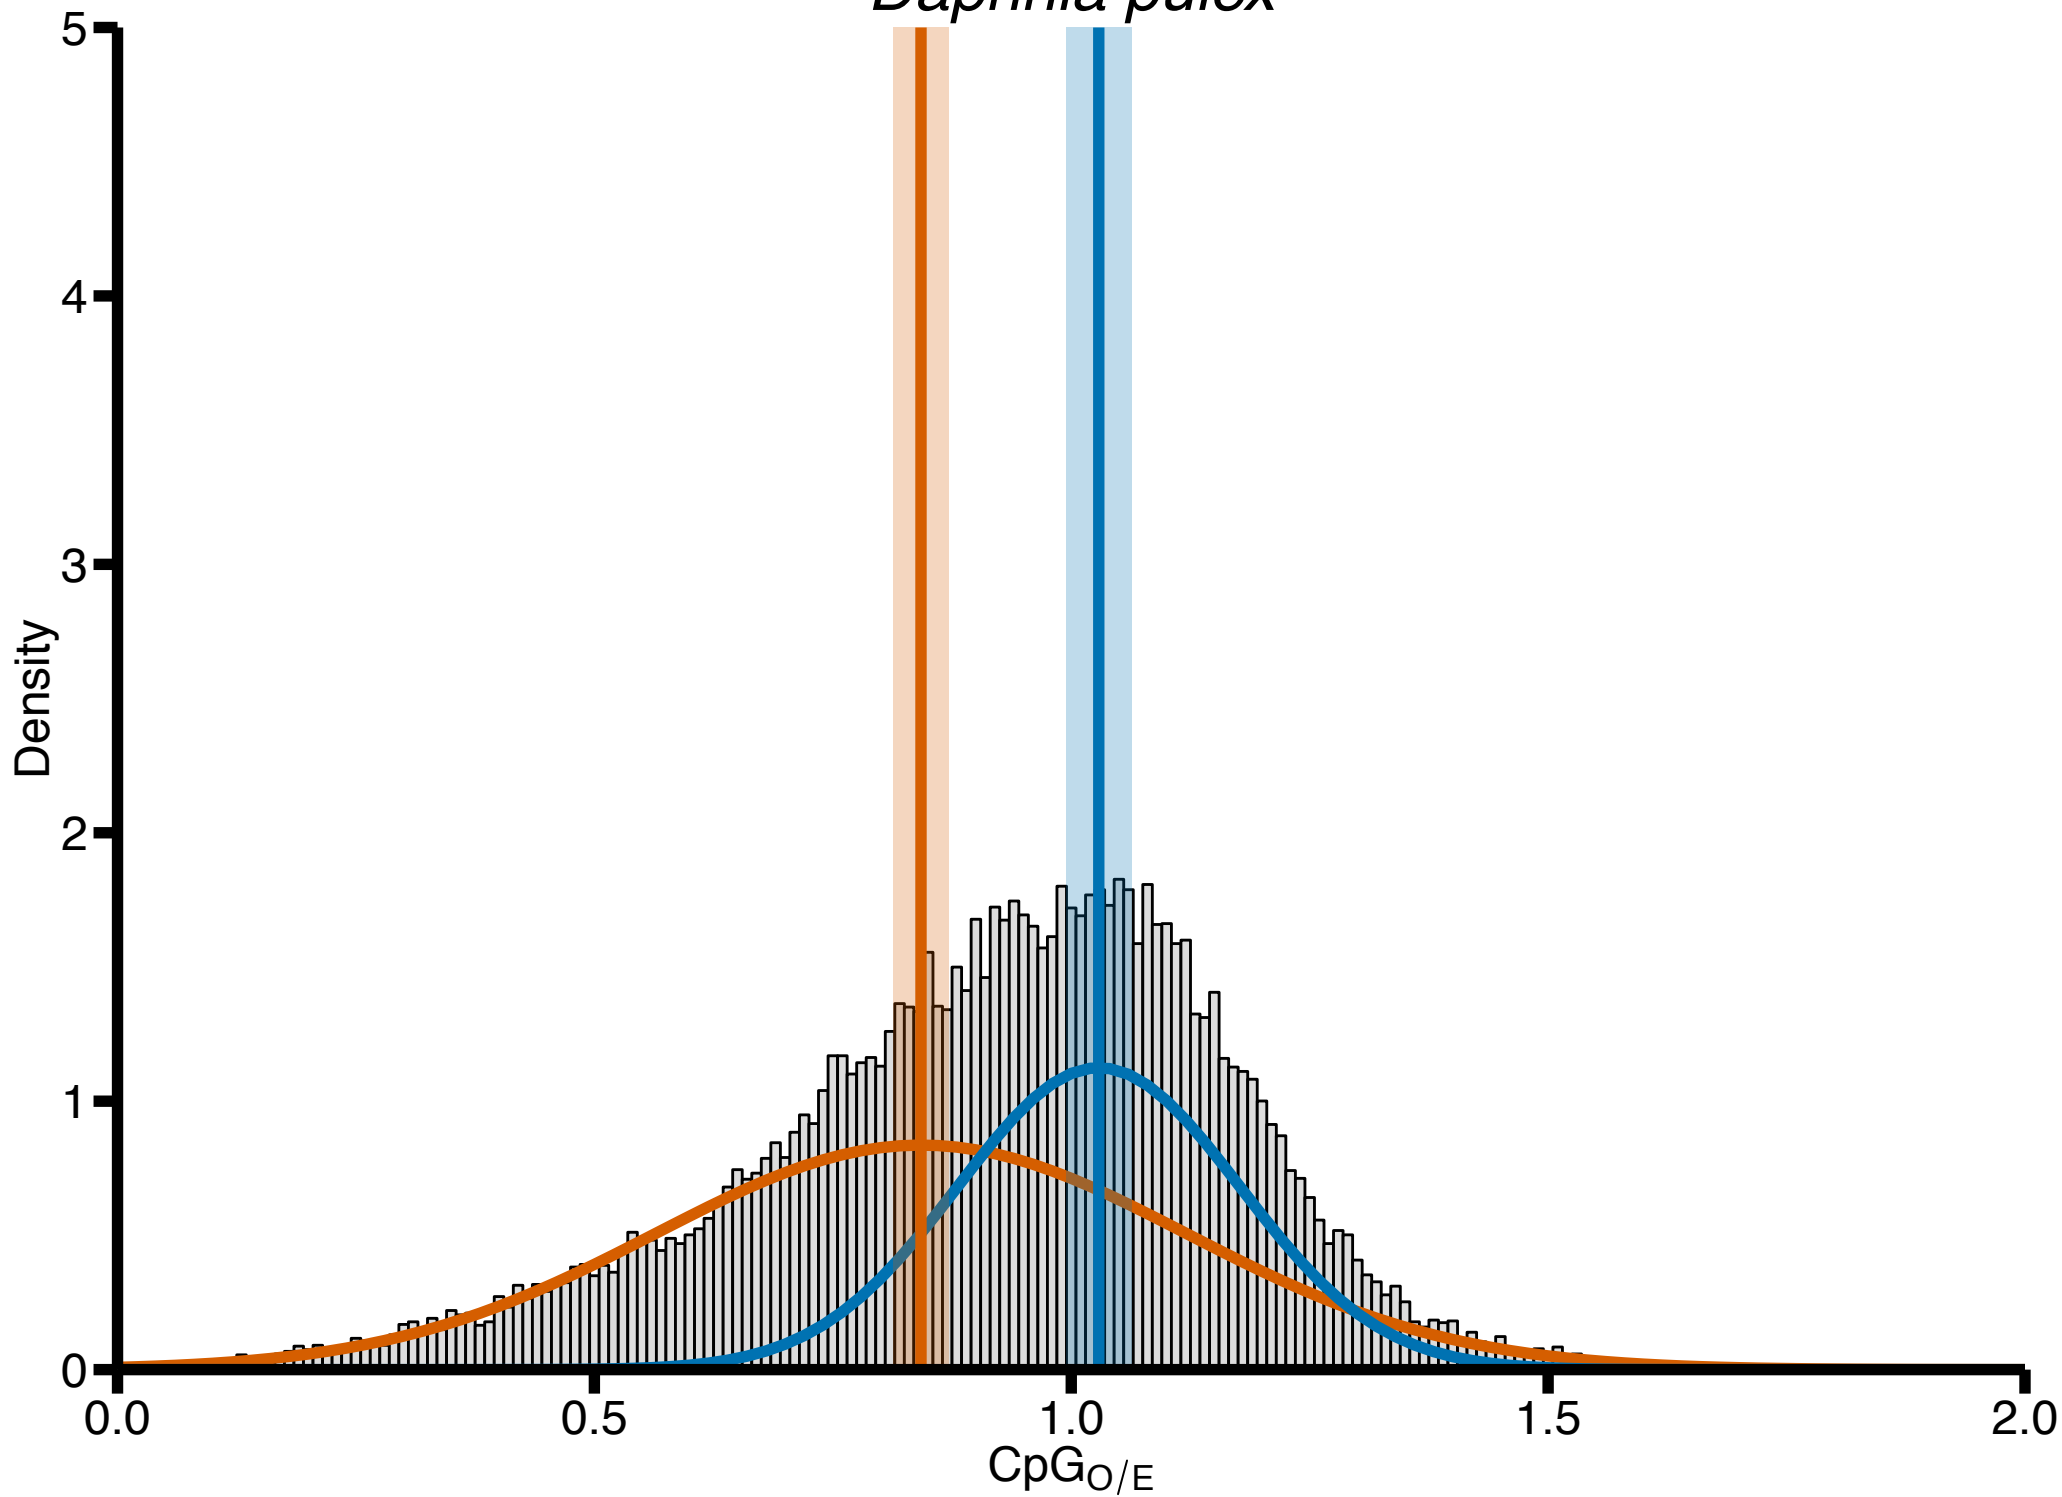

*Catajapyx aquilonaris*

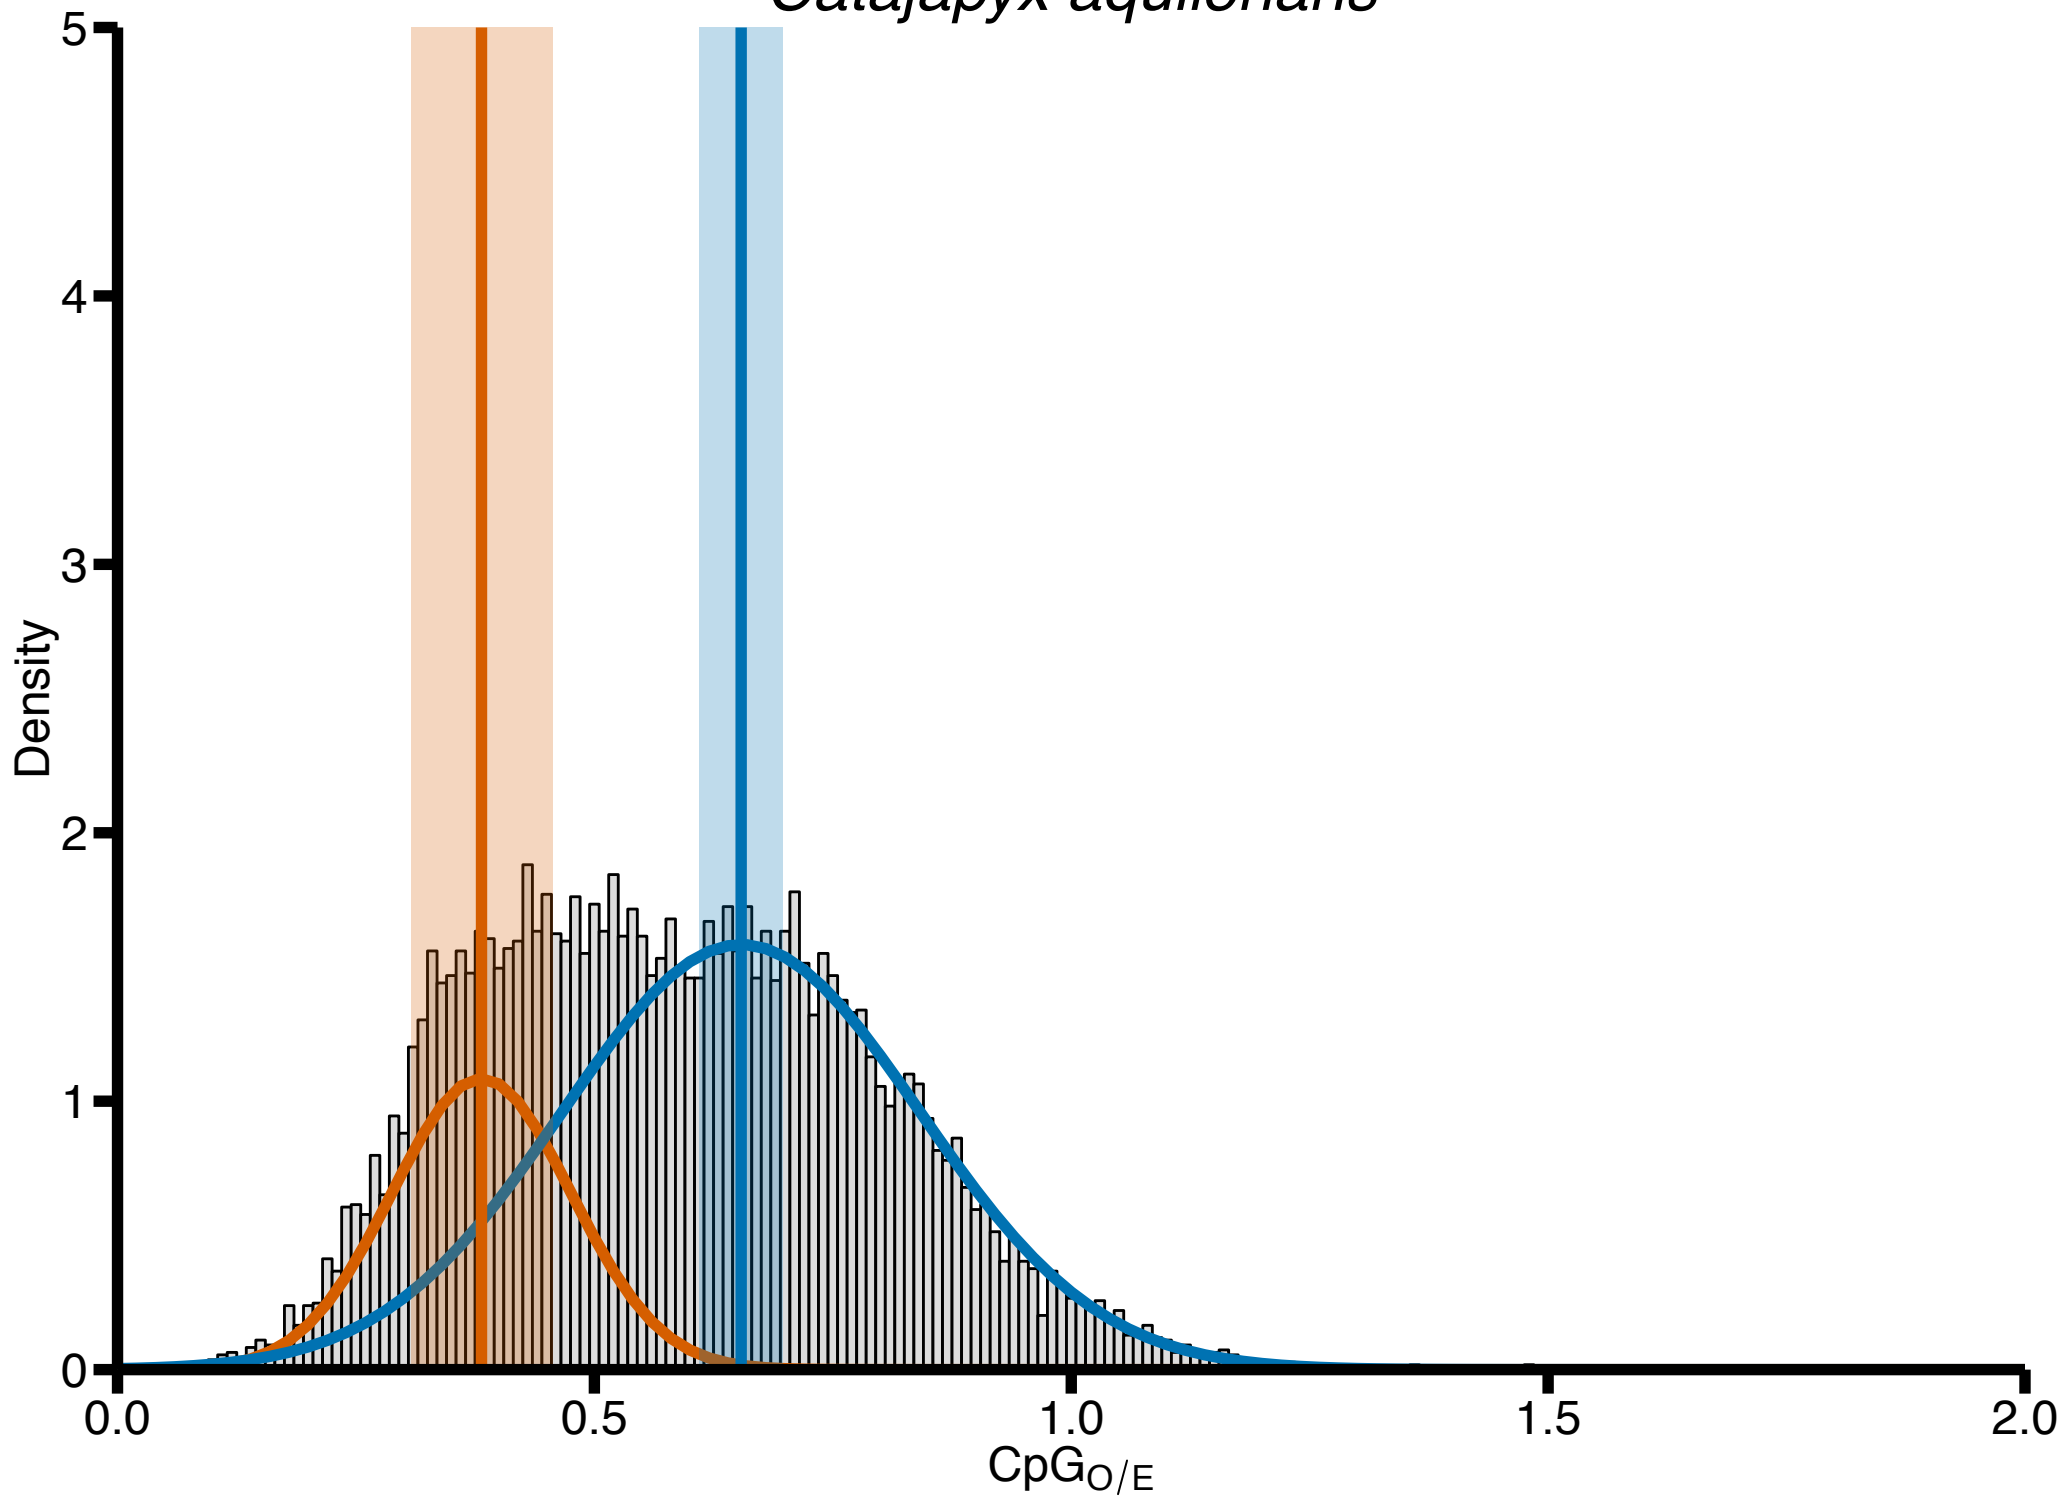

*Aedes aegypti*

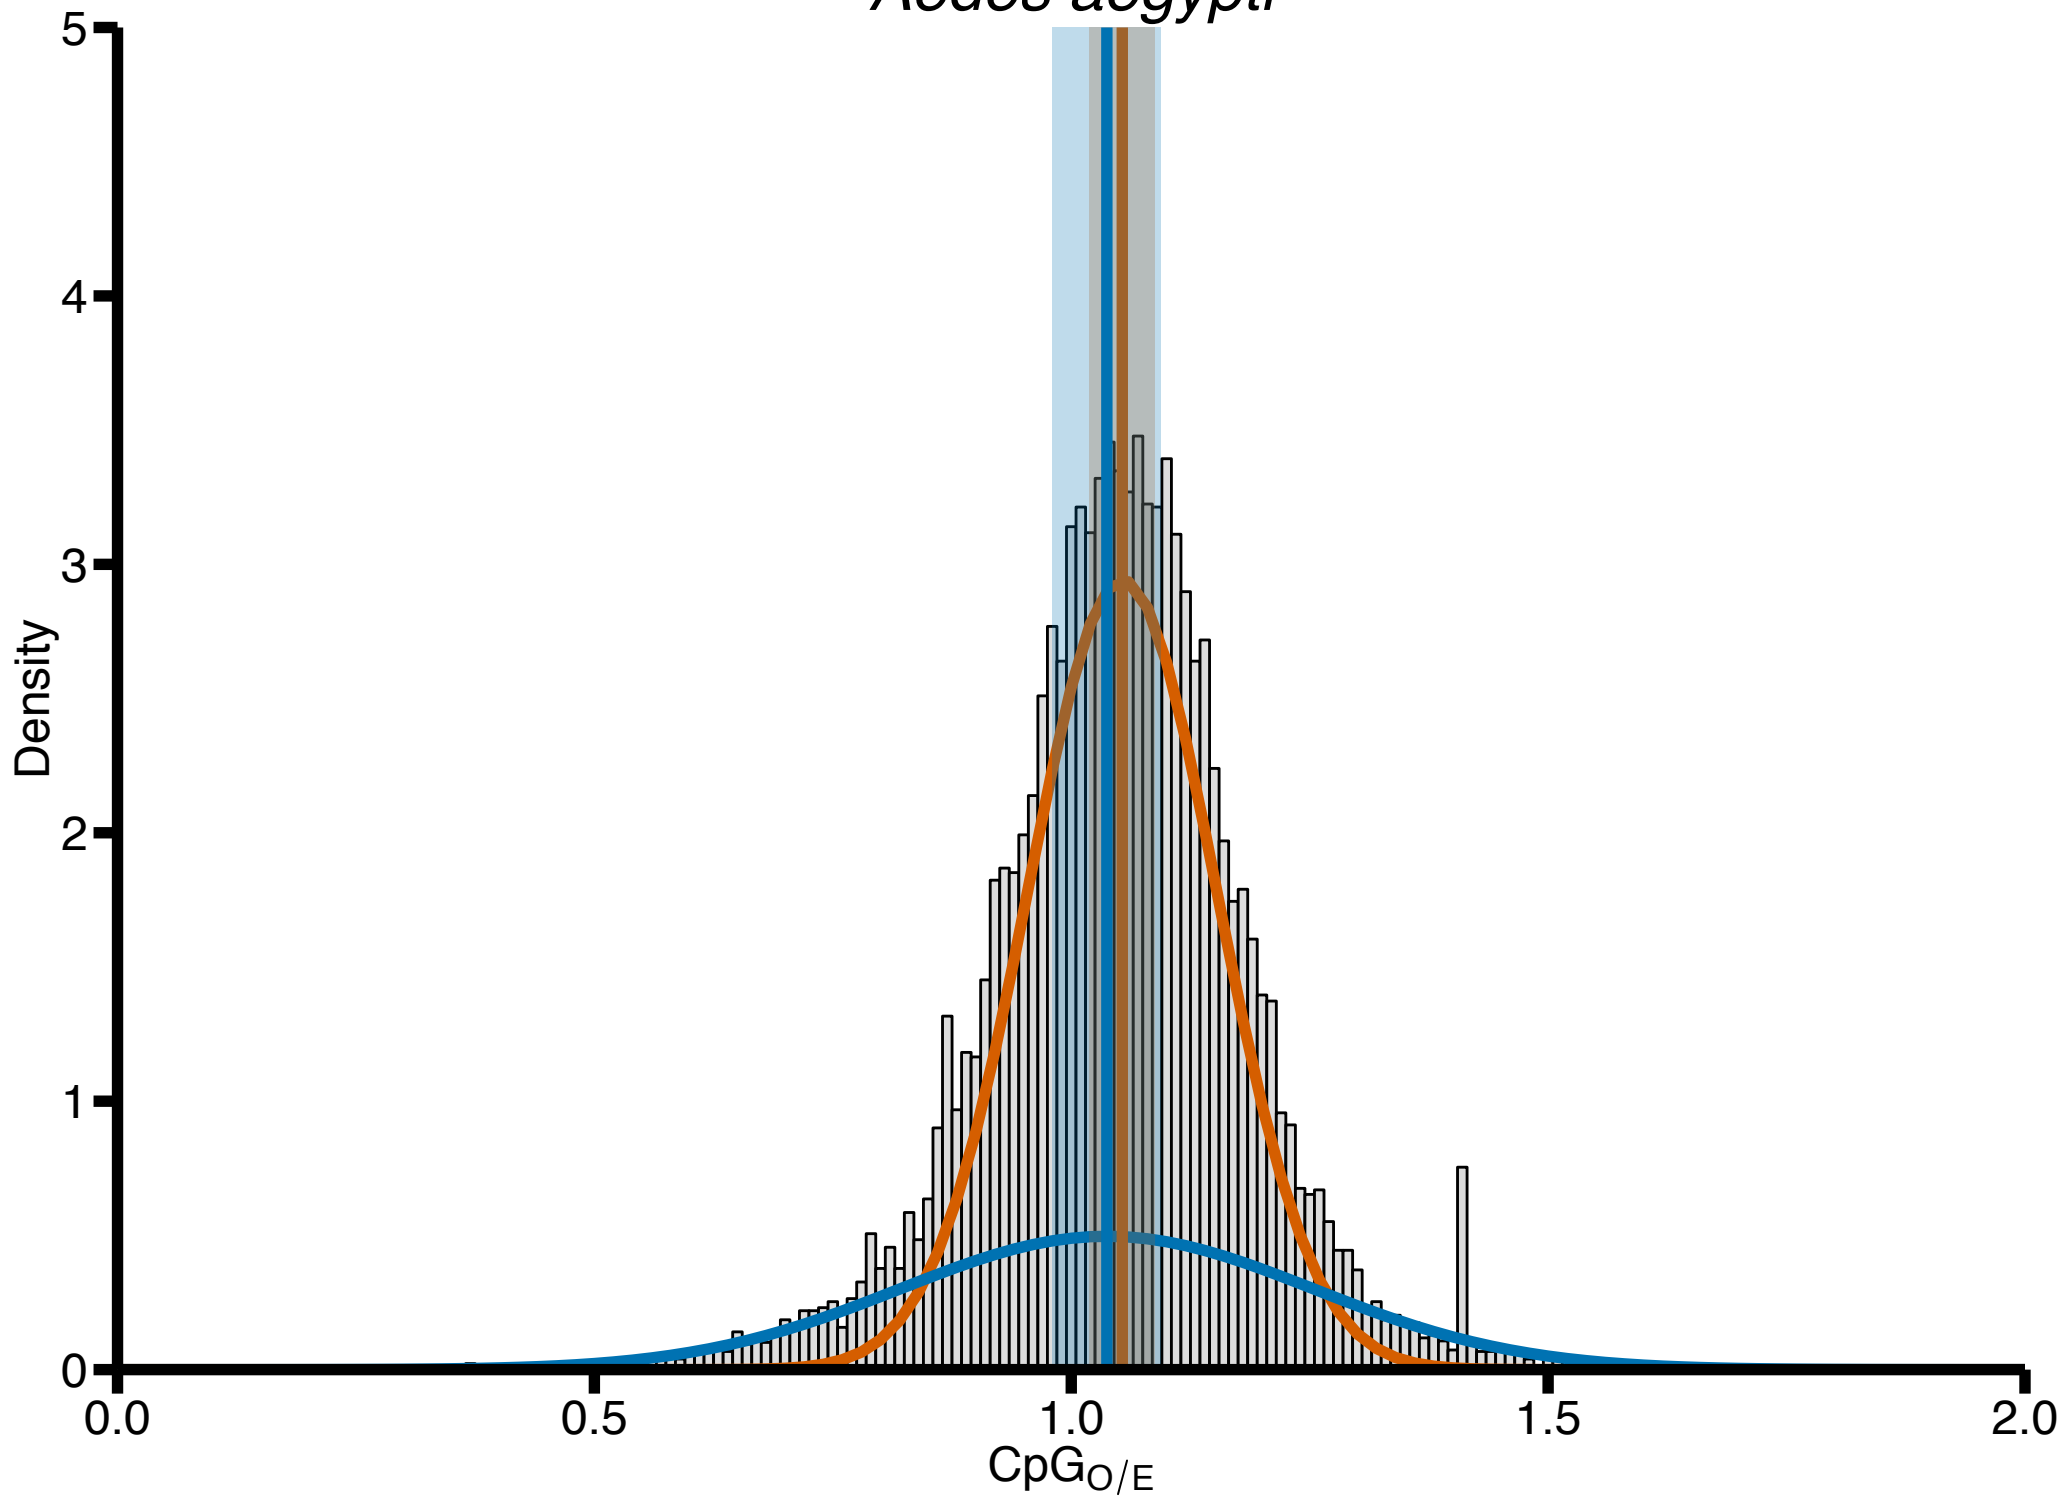

*Aedes albopictus*

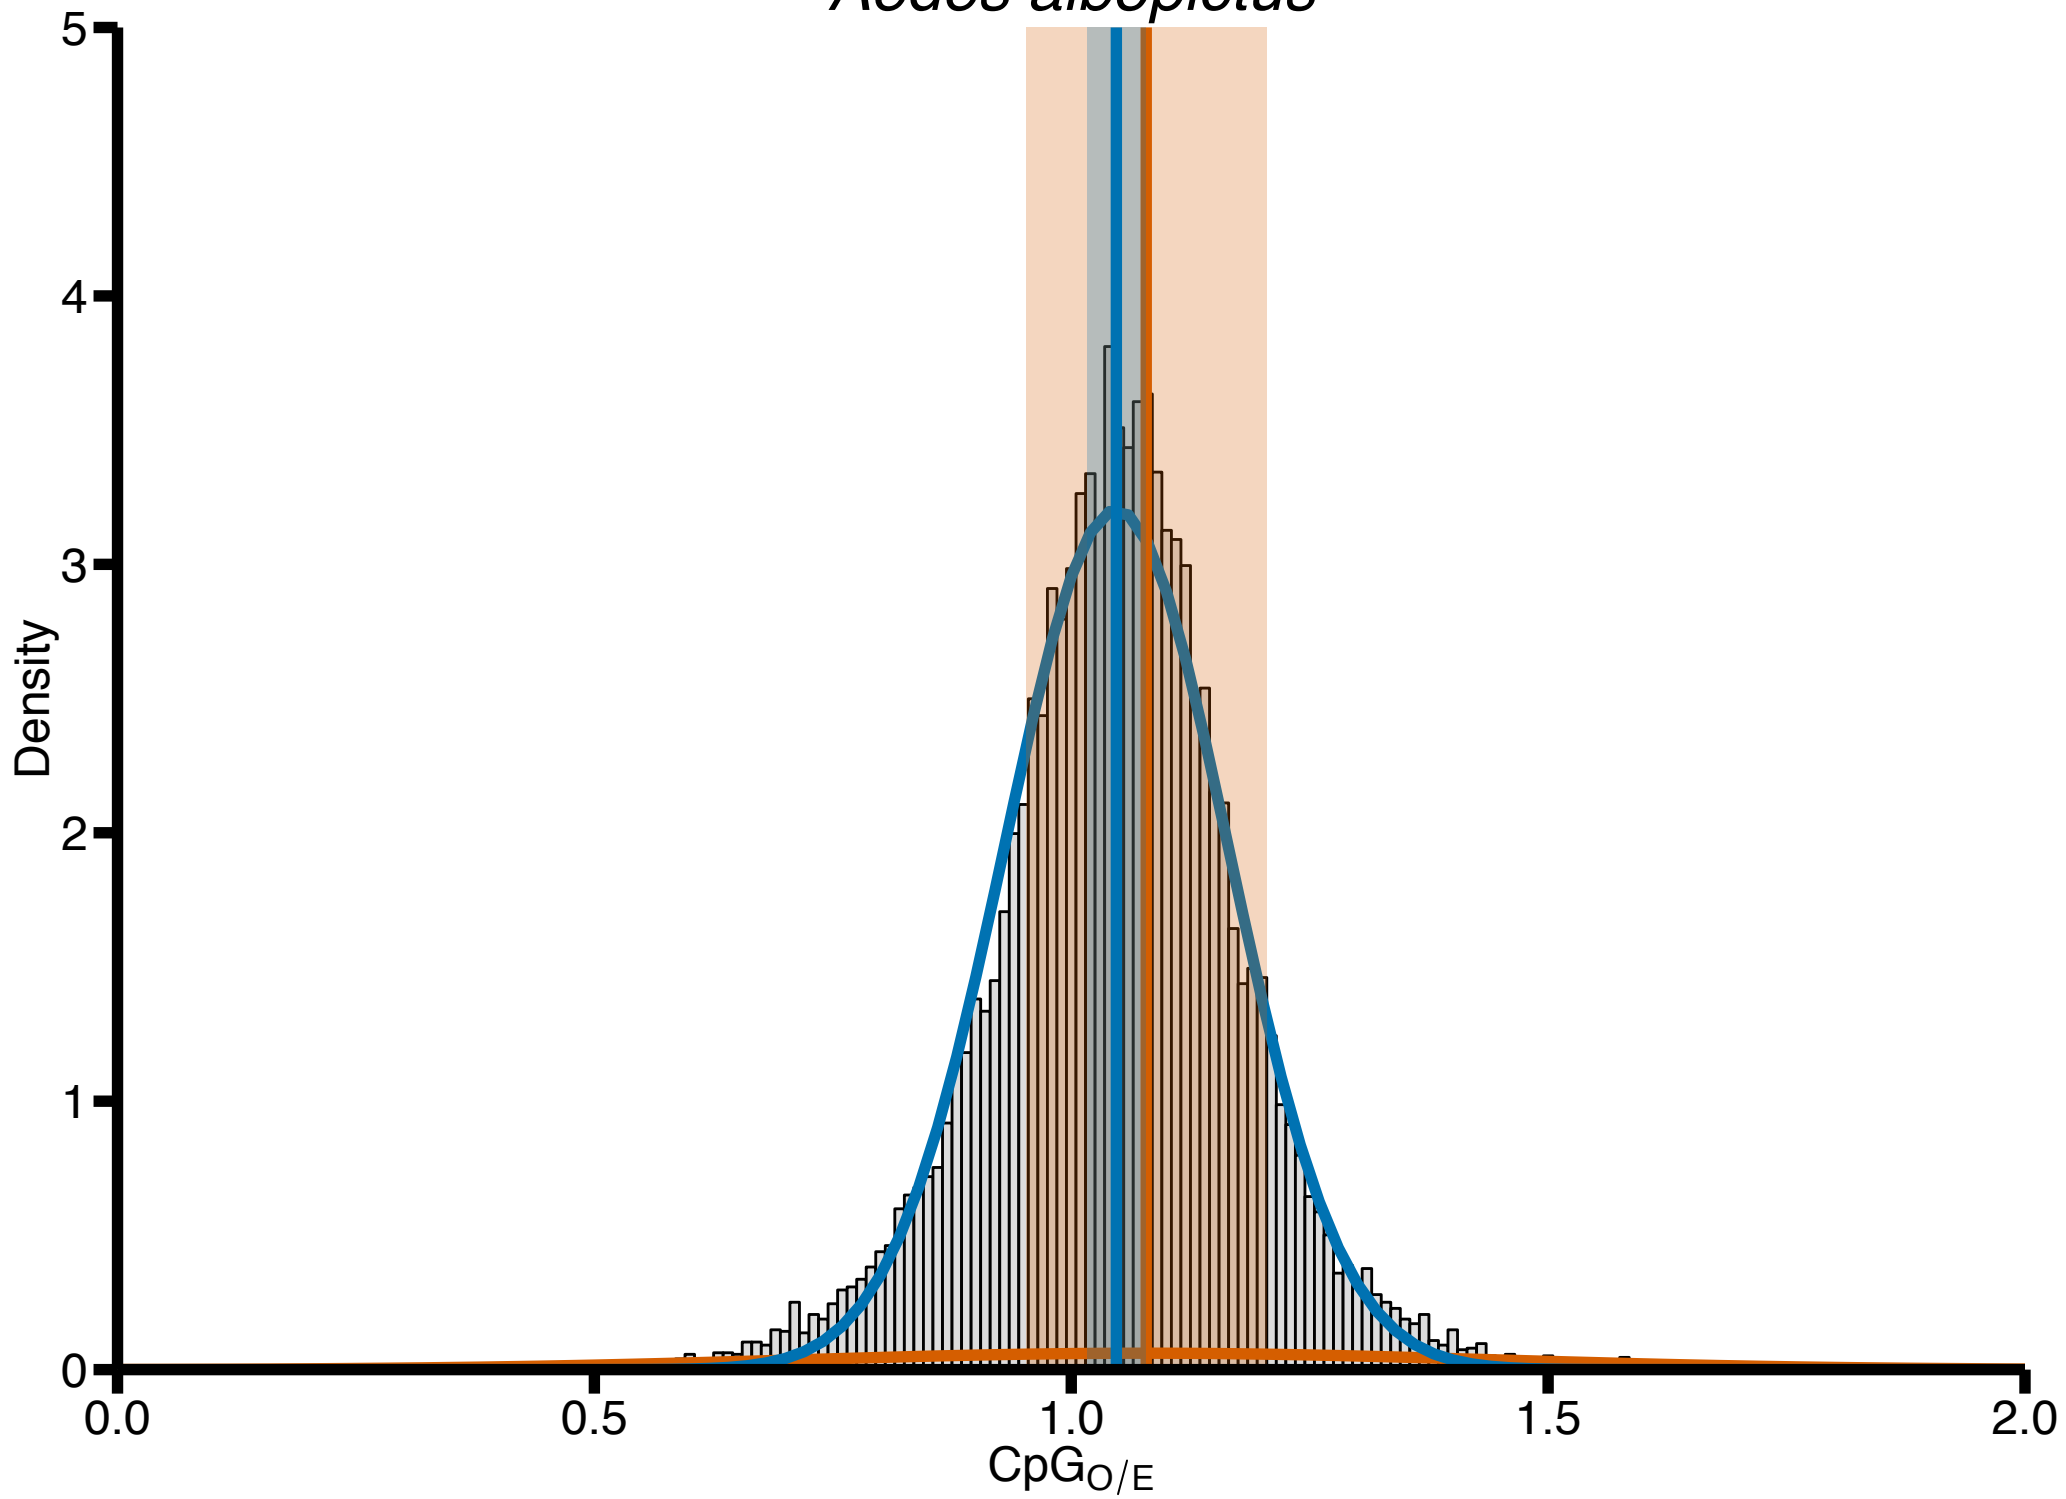

*Anopheles albimanus*

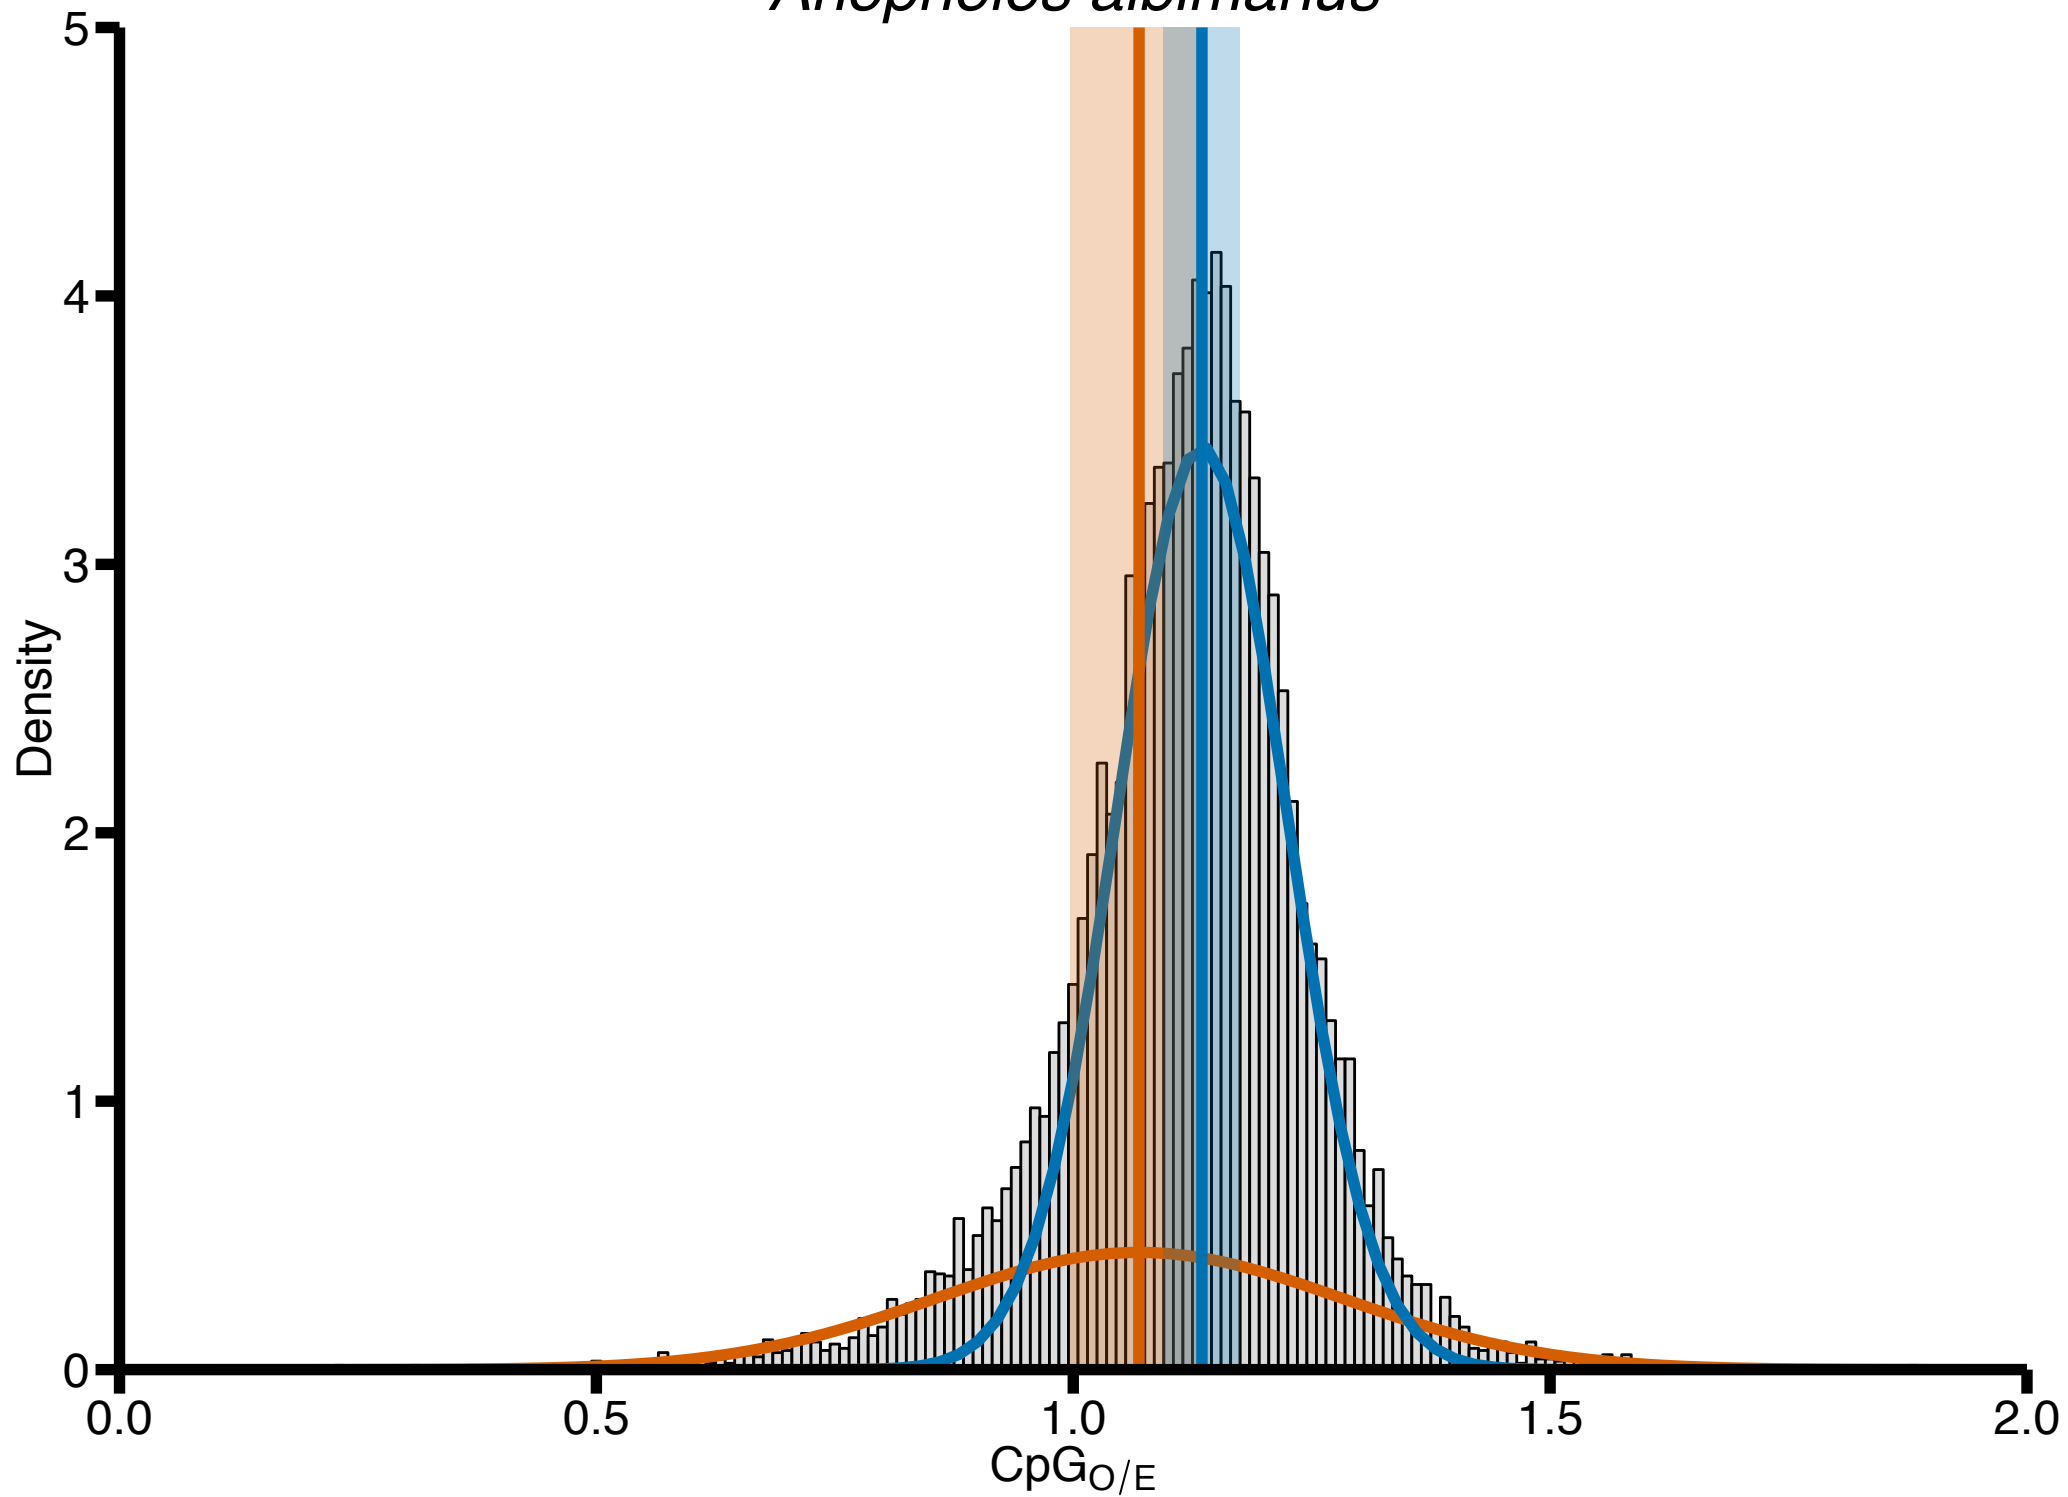

*Anopheles arabiensis*

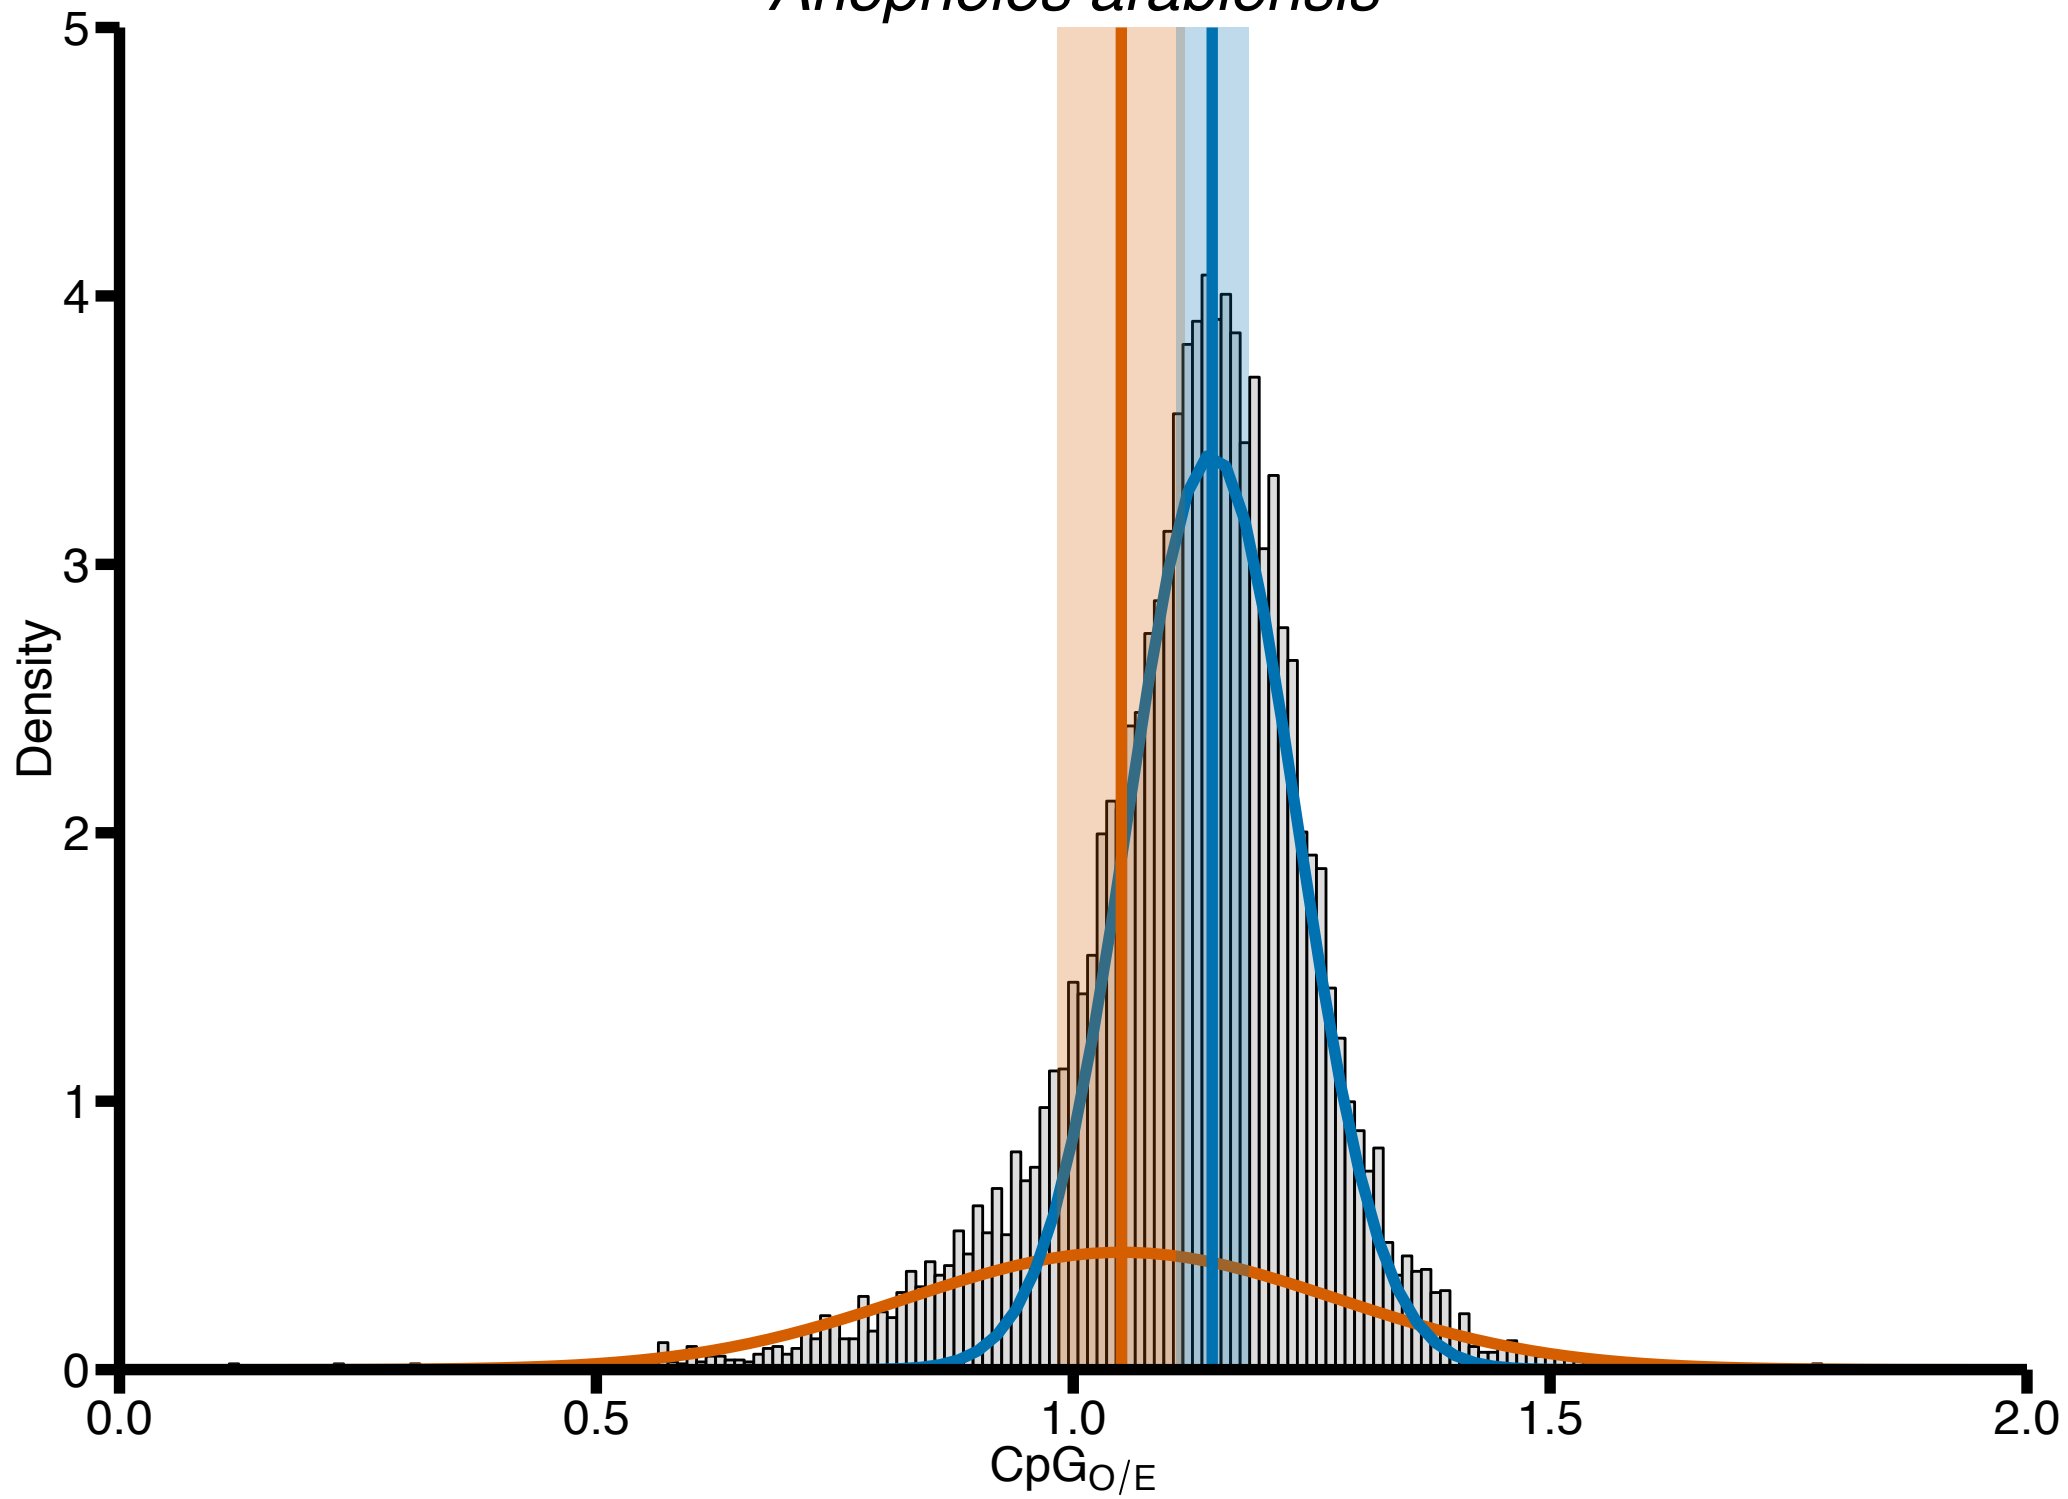

*Anopheles atroparvus*

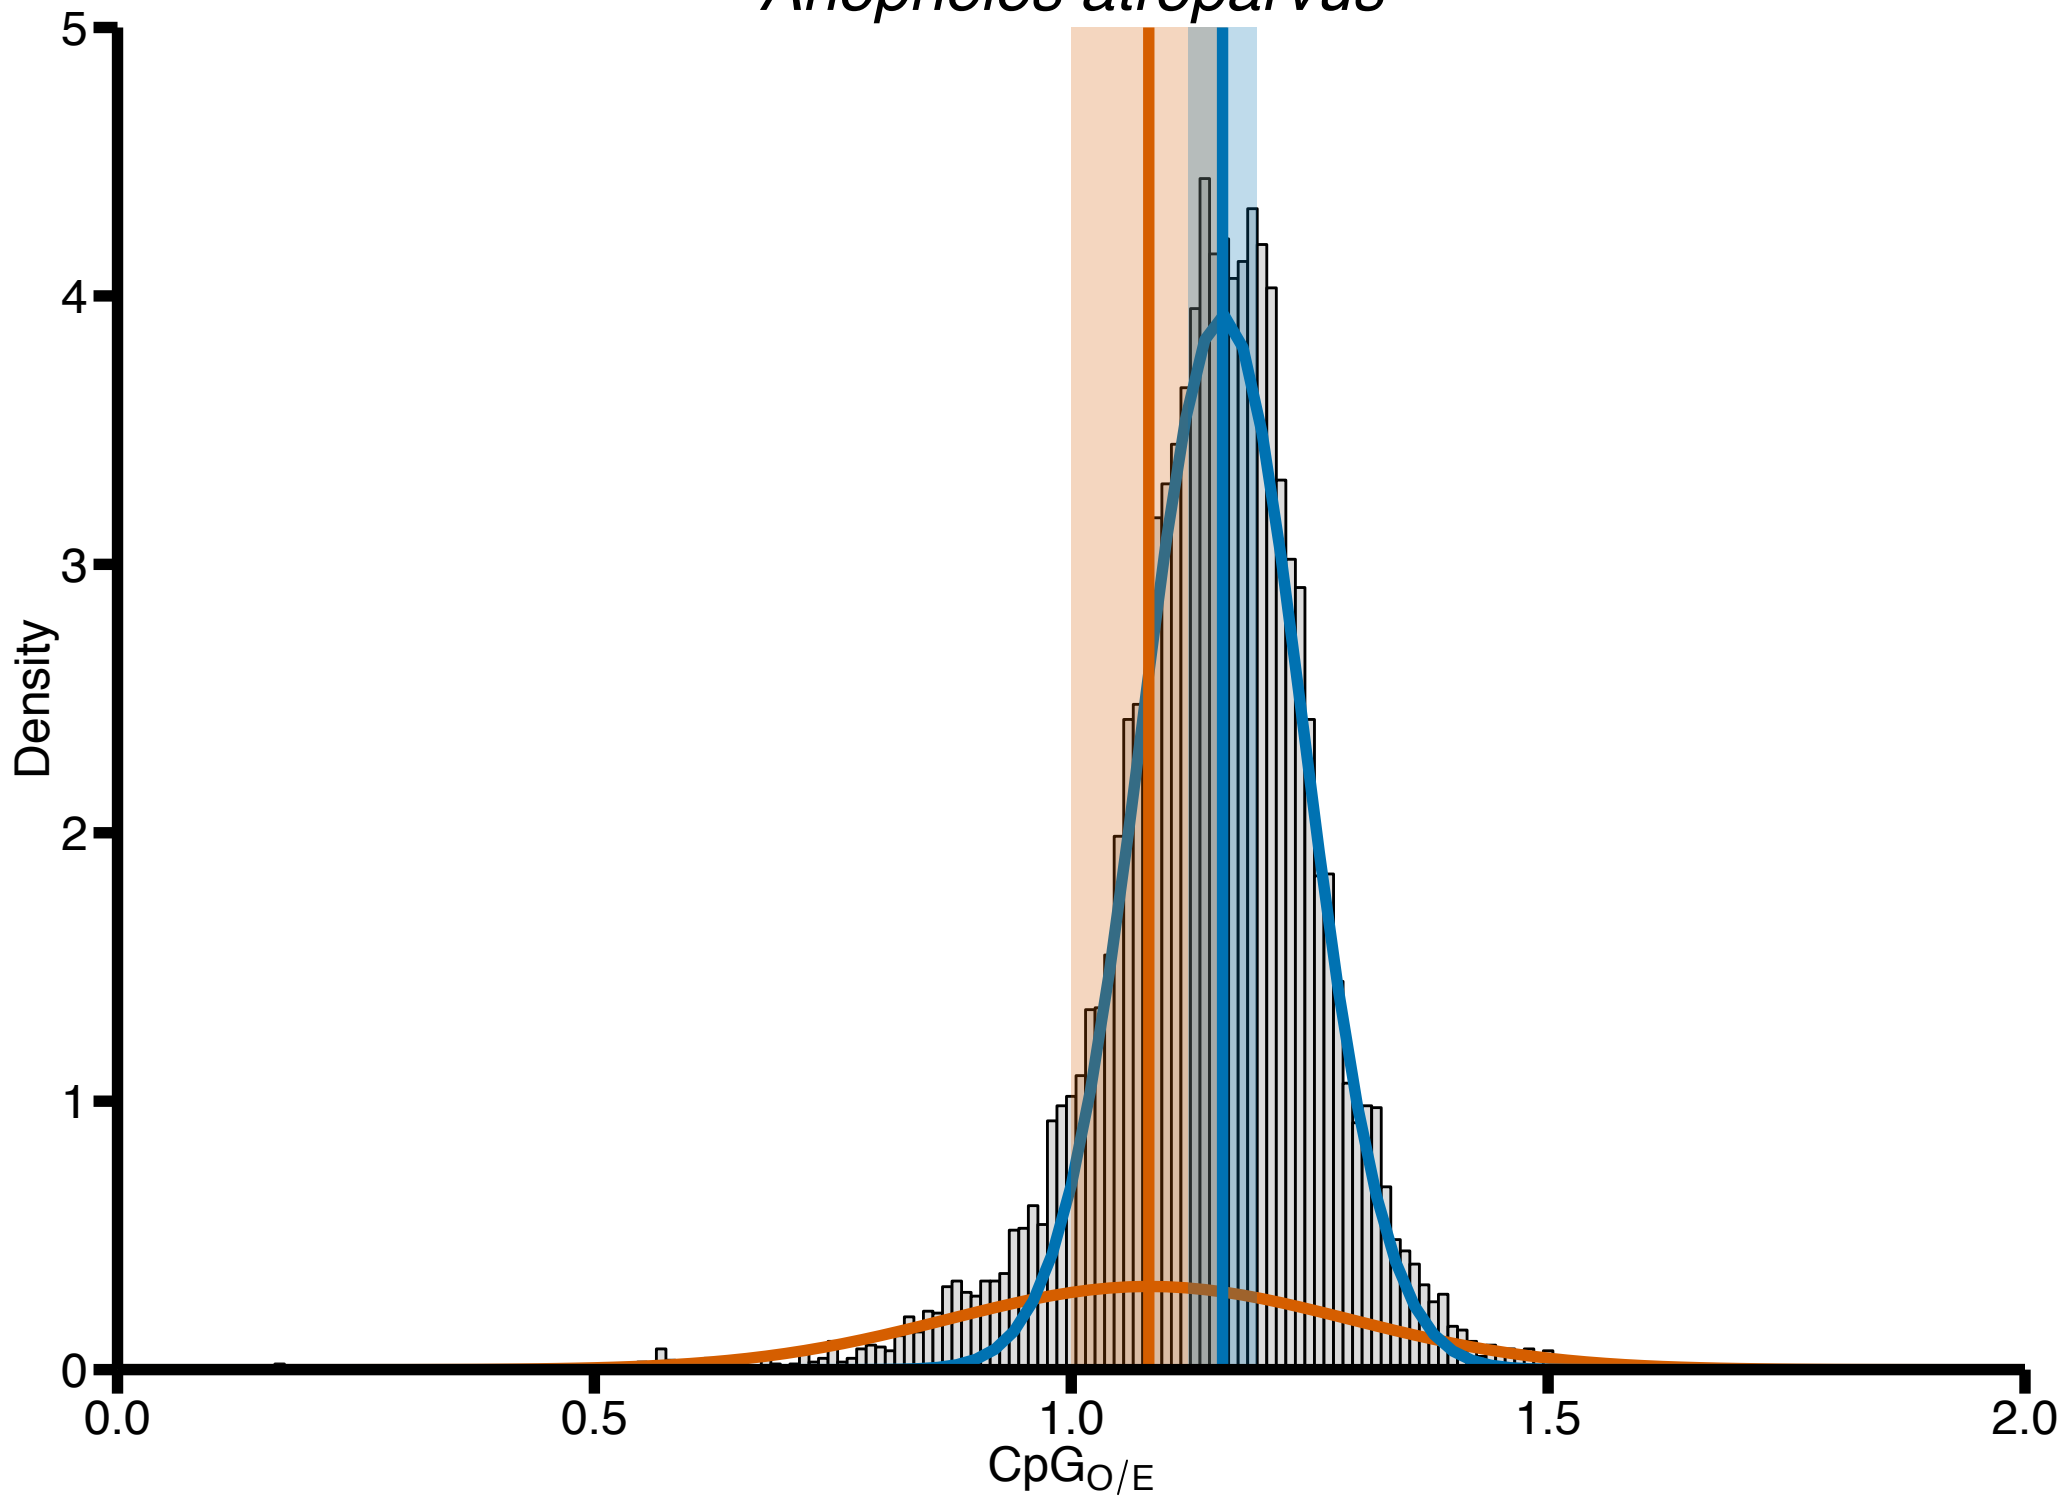

*Anopheles christyi*

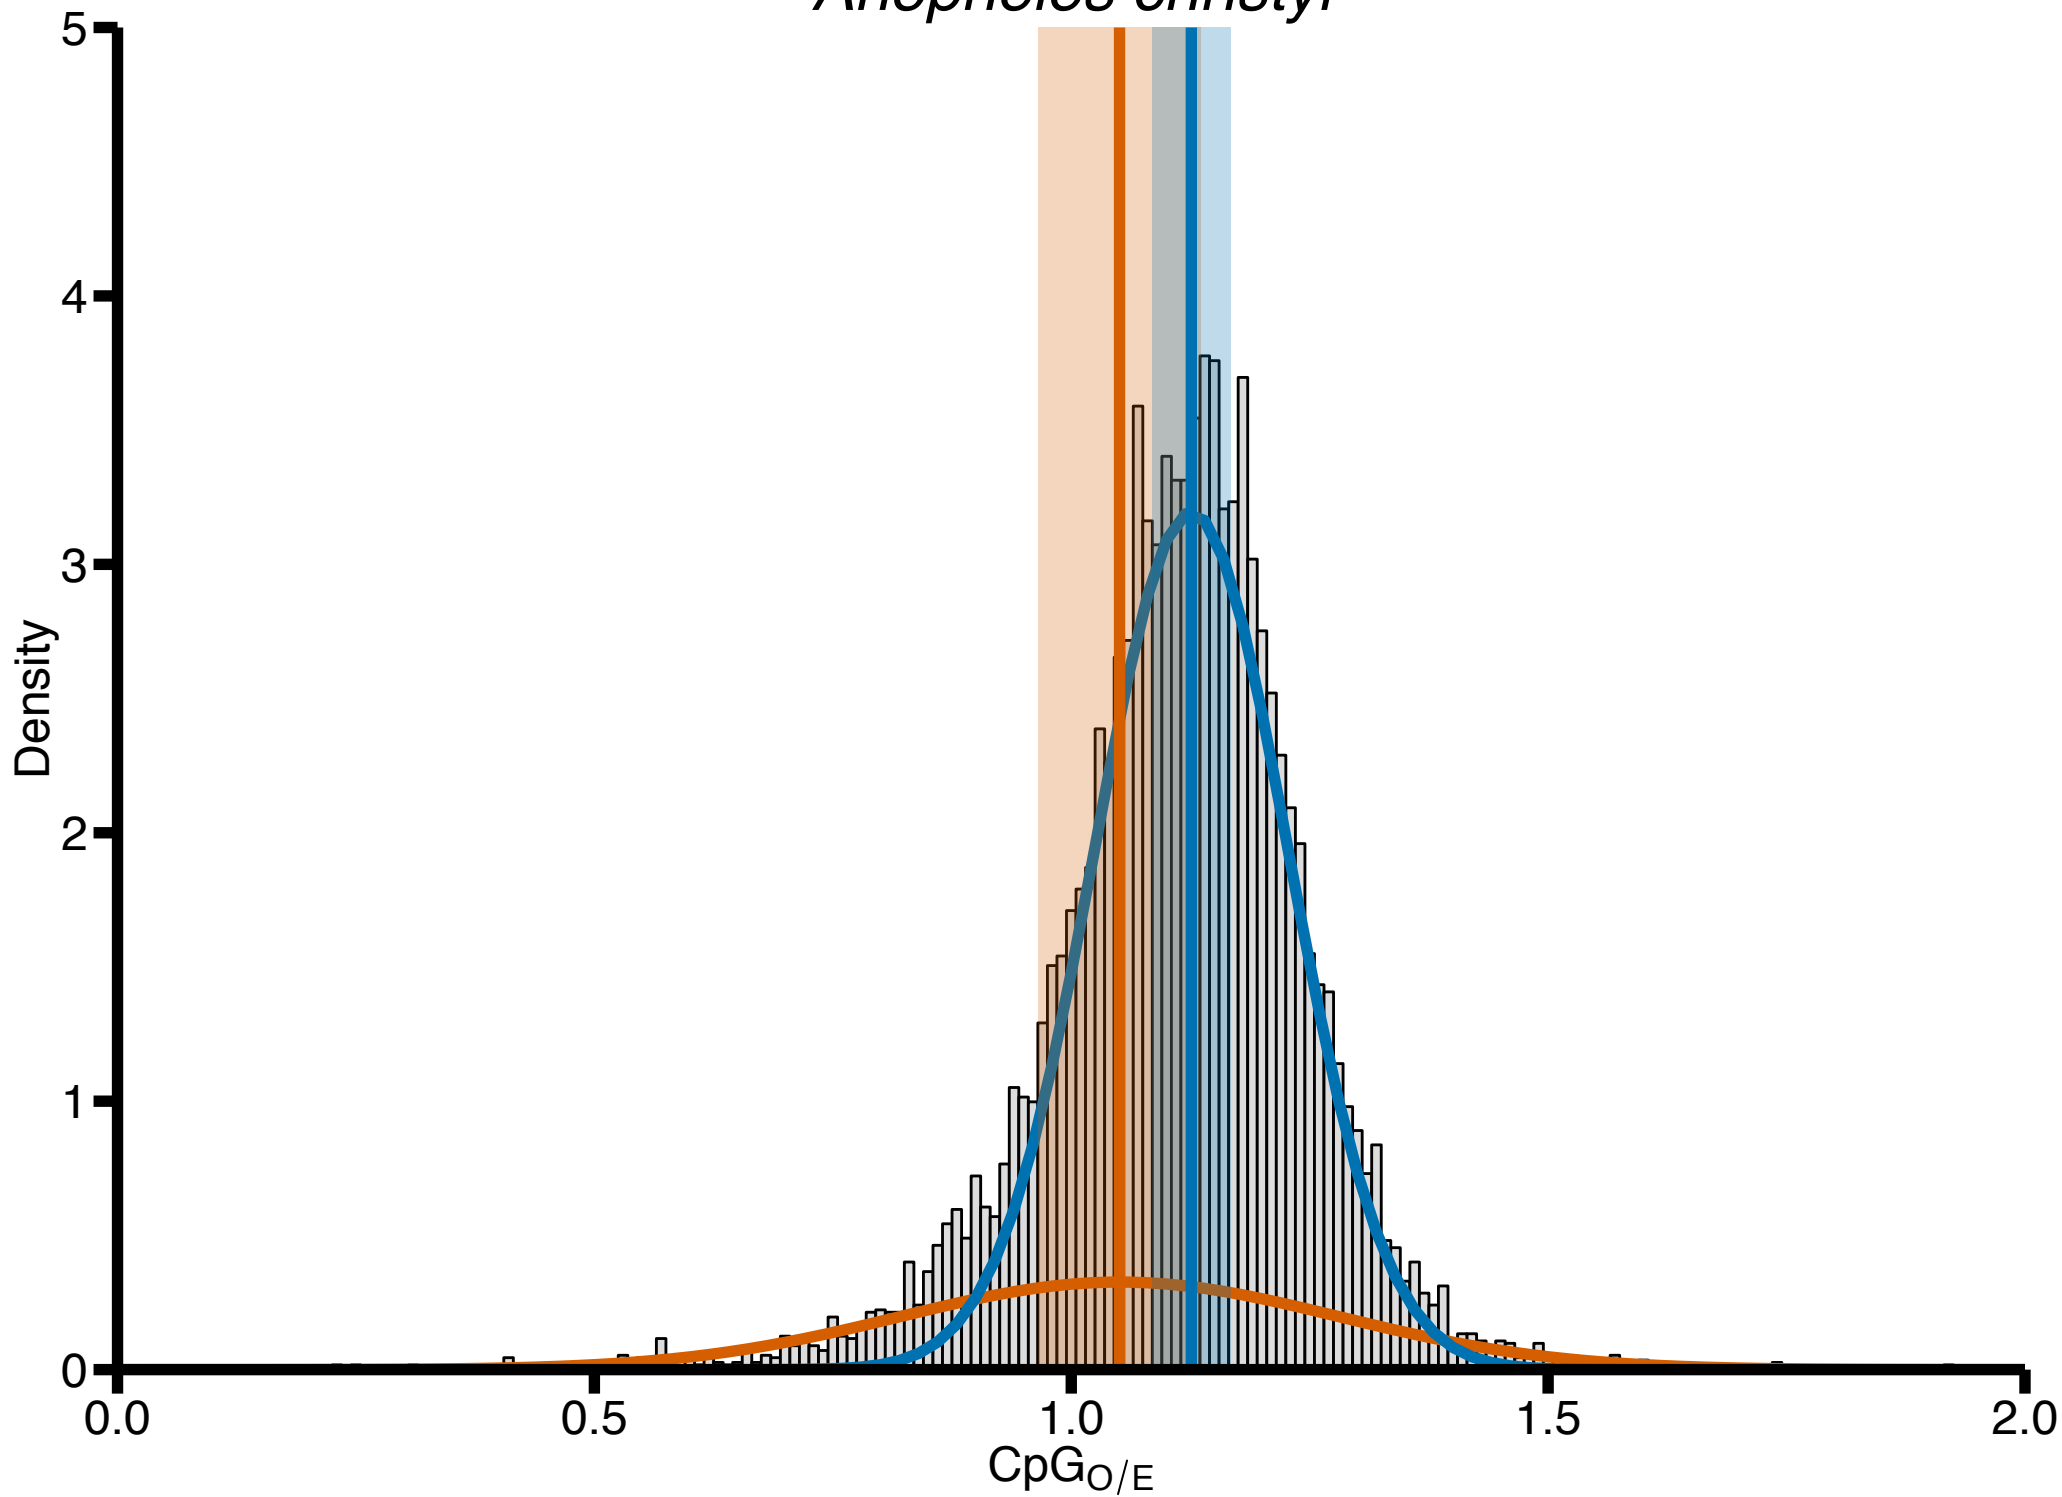



*Anopheles culicifacies*

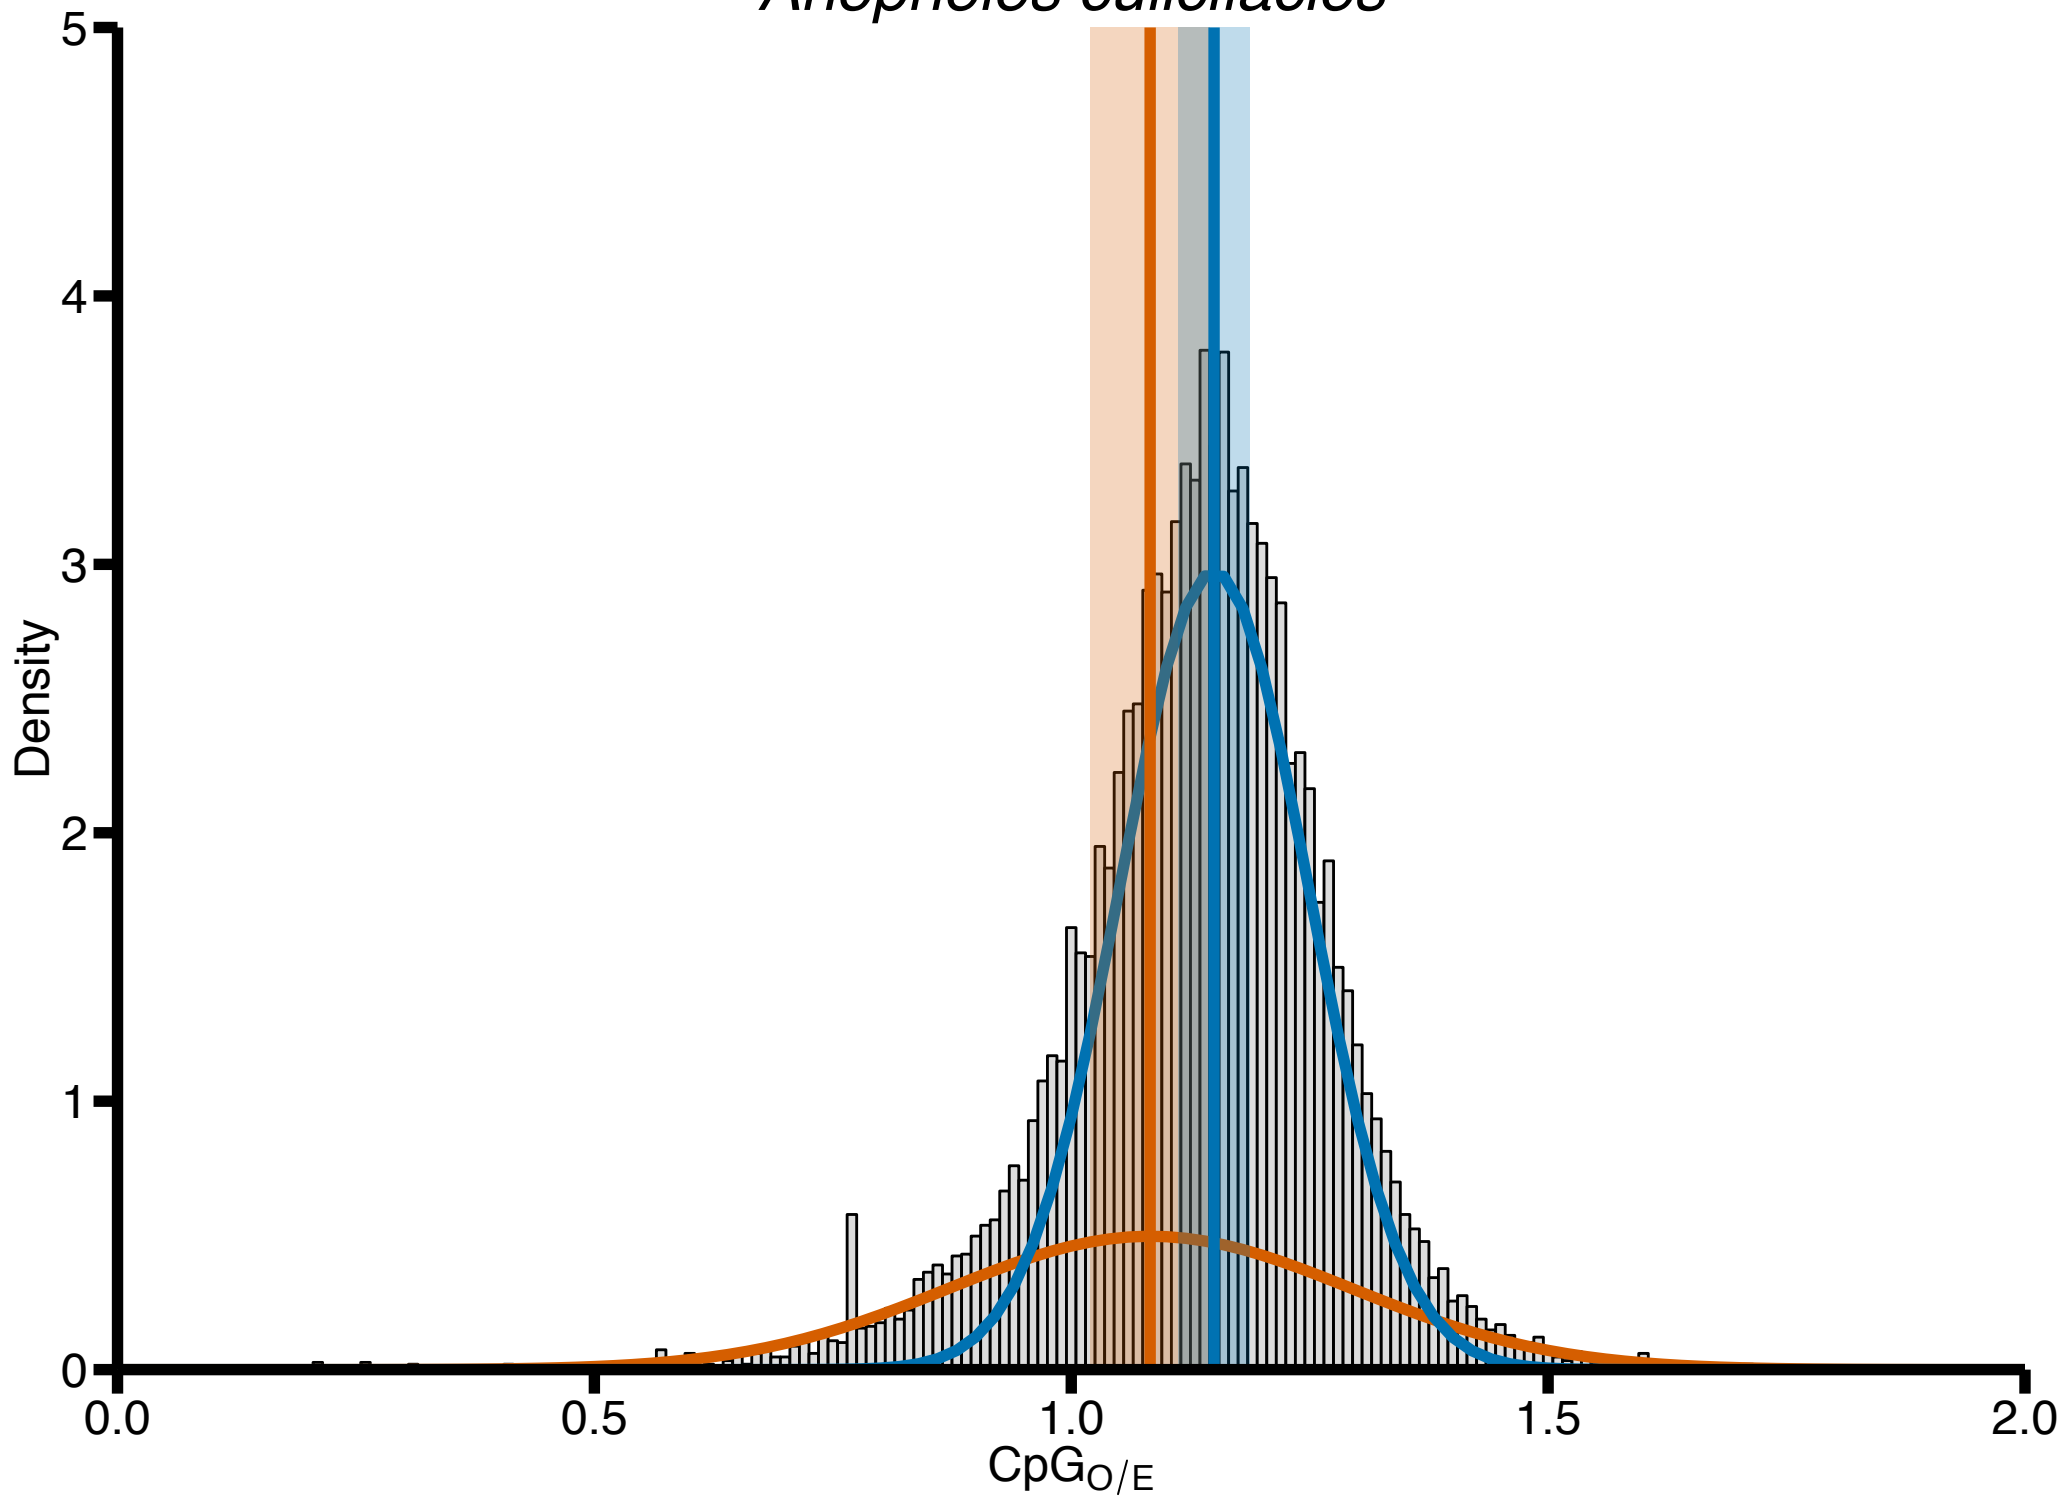

*Anopheles darlingi*

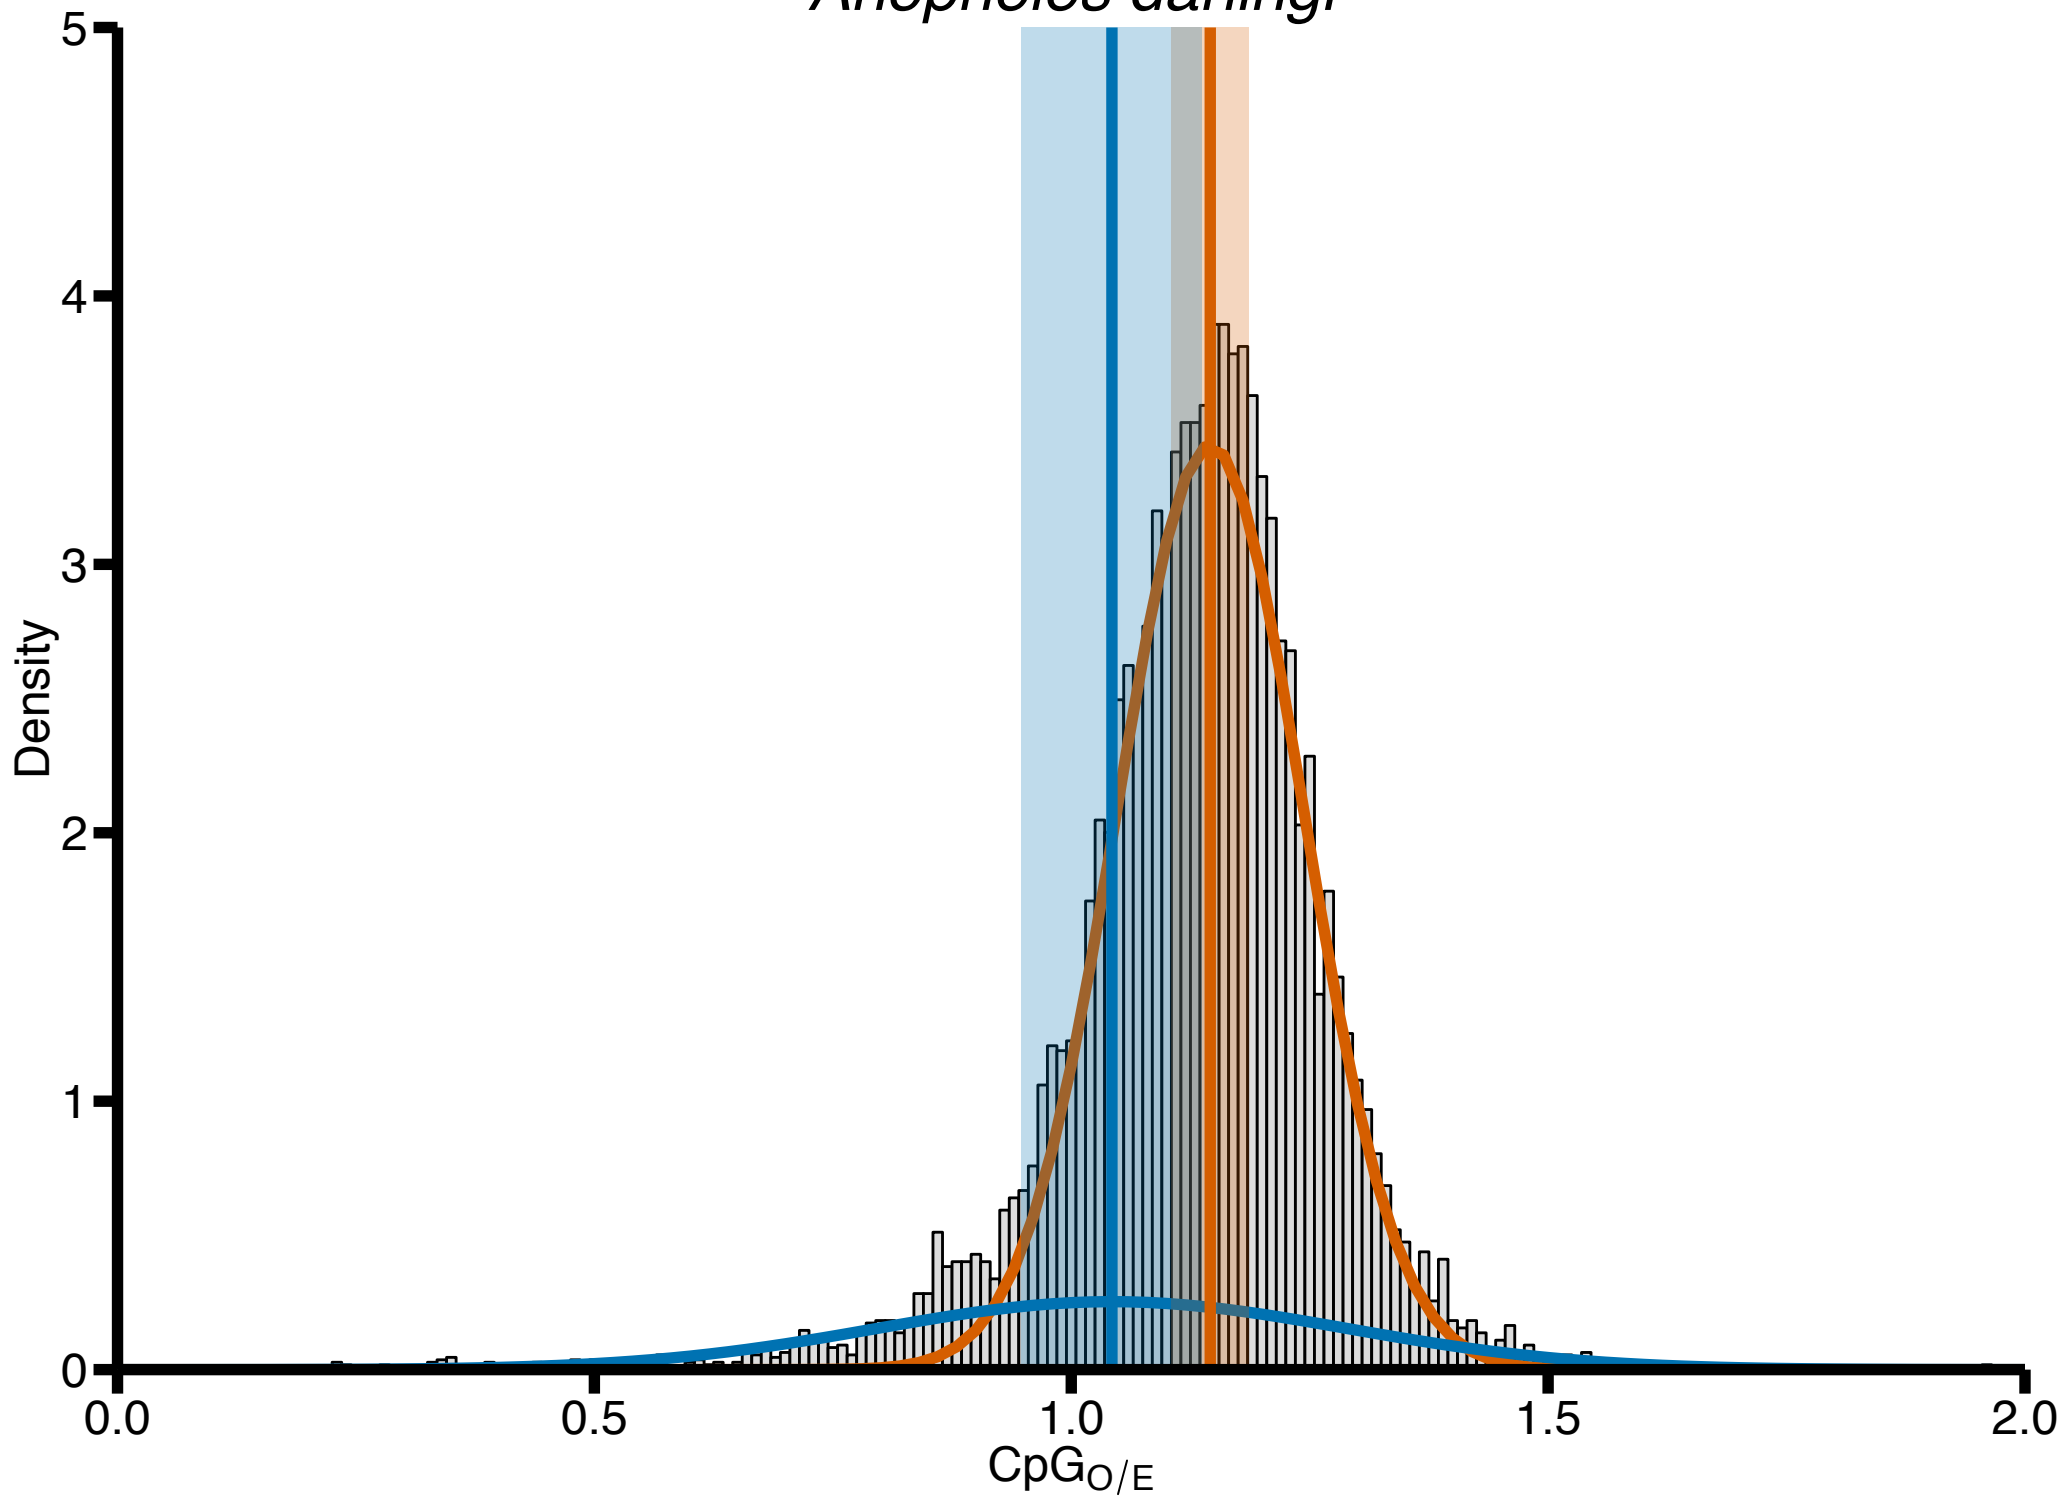

*Anopheles dirus*

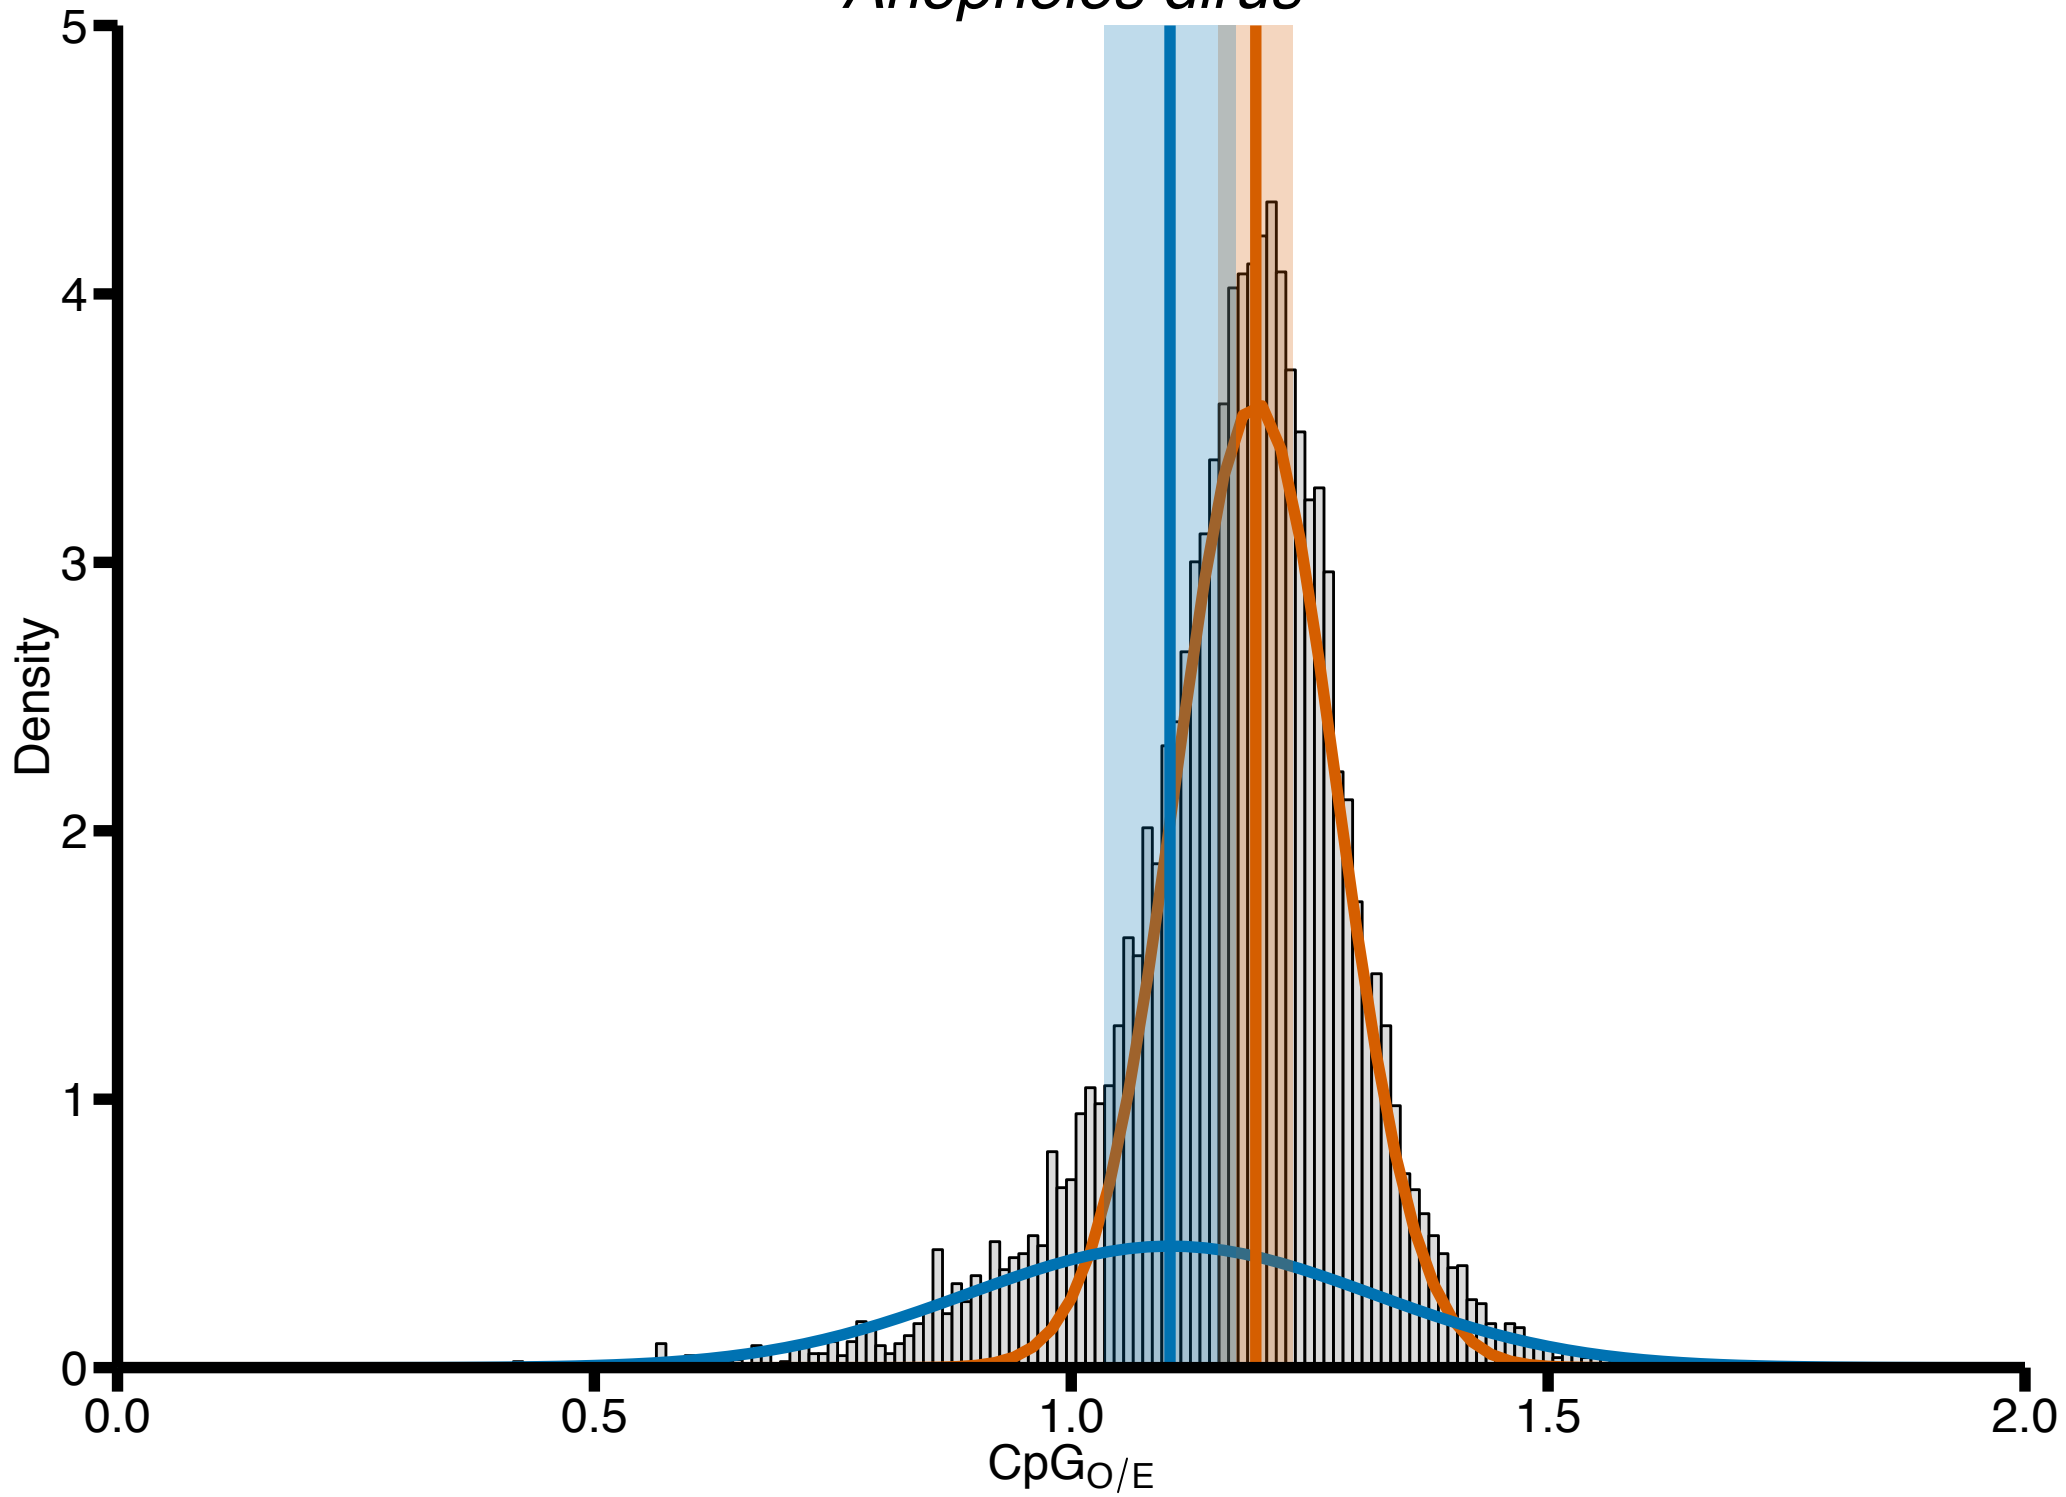

*Anopheles epiroticus*

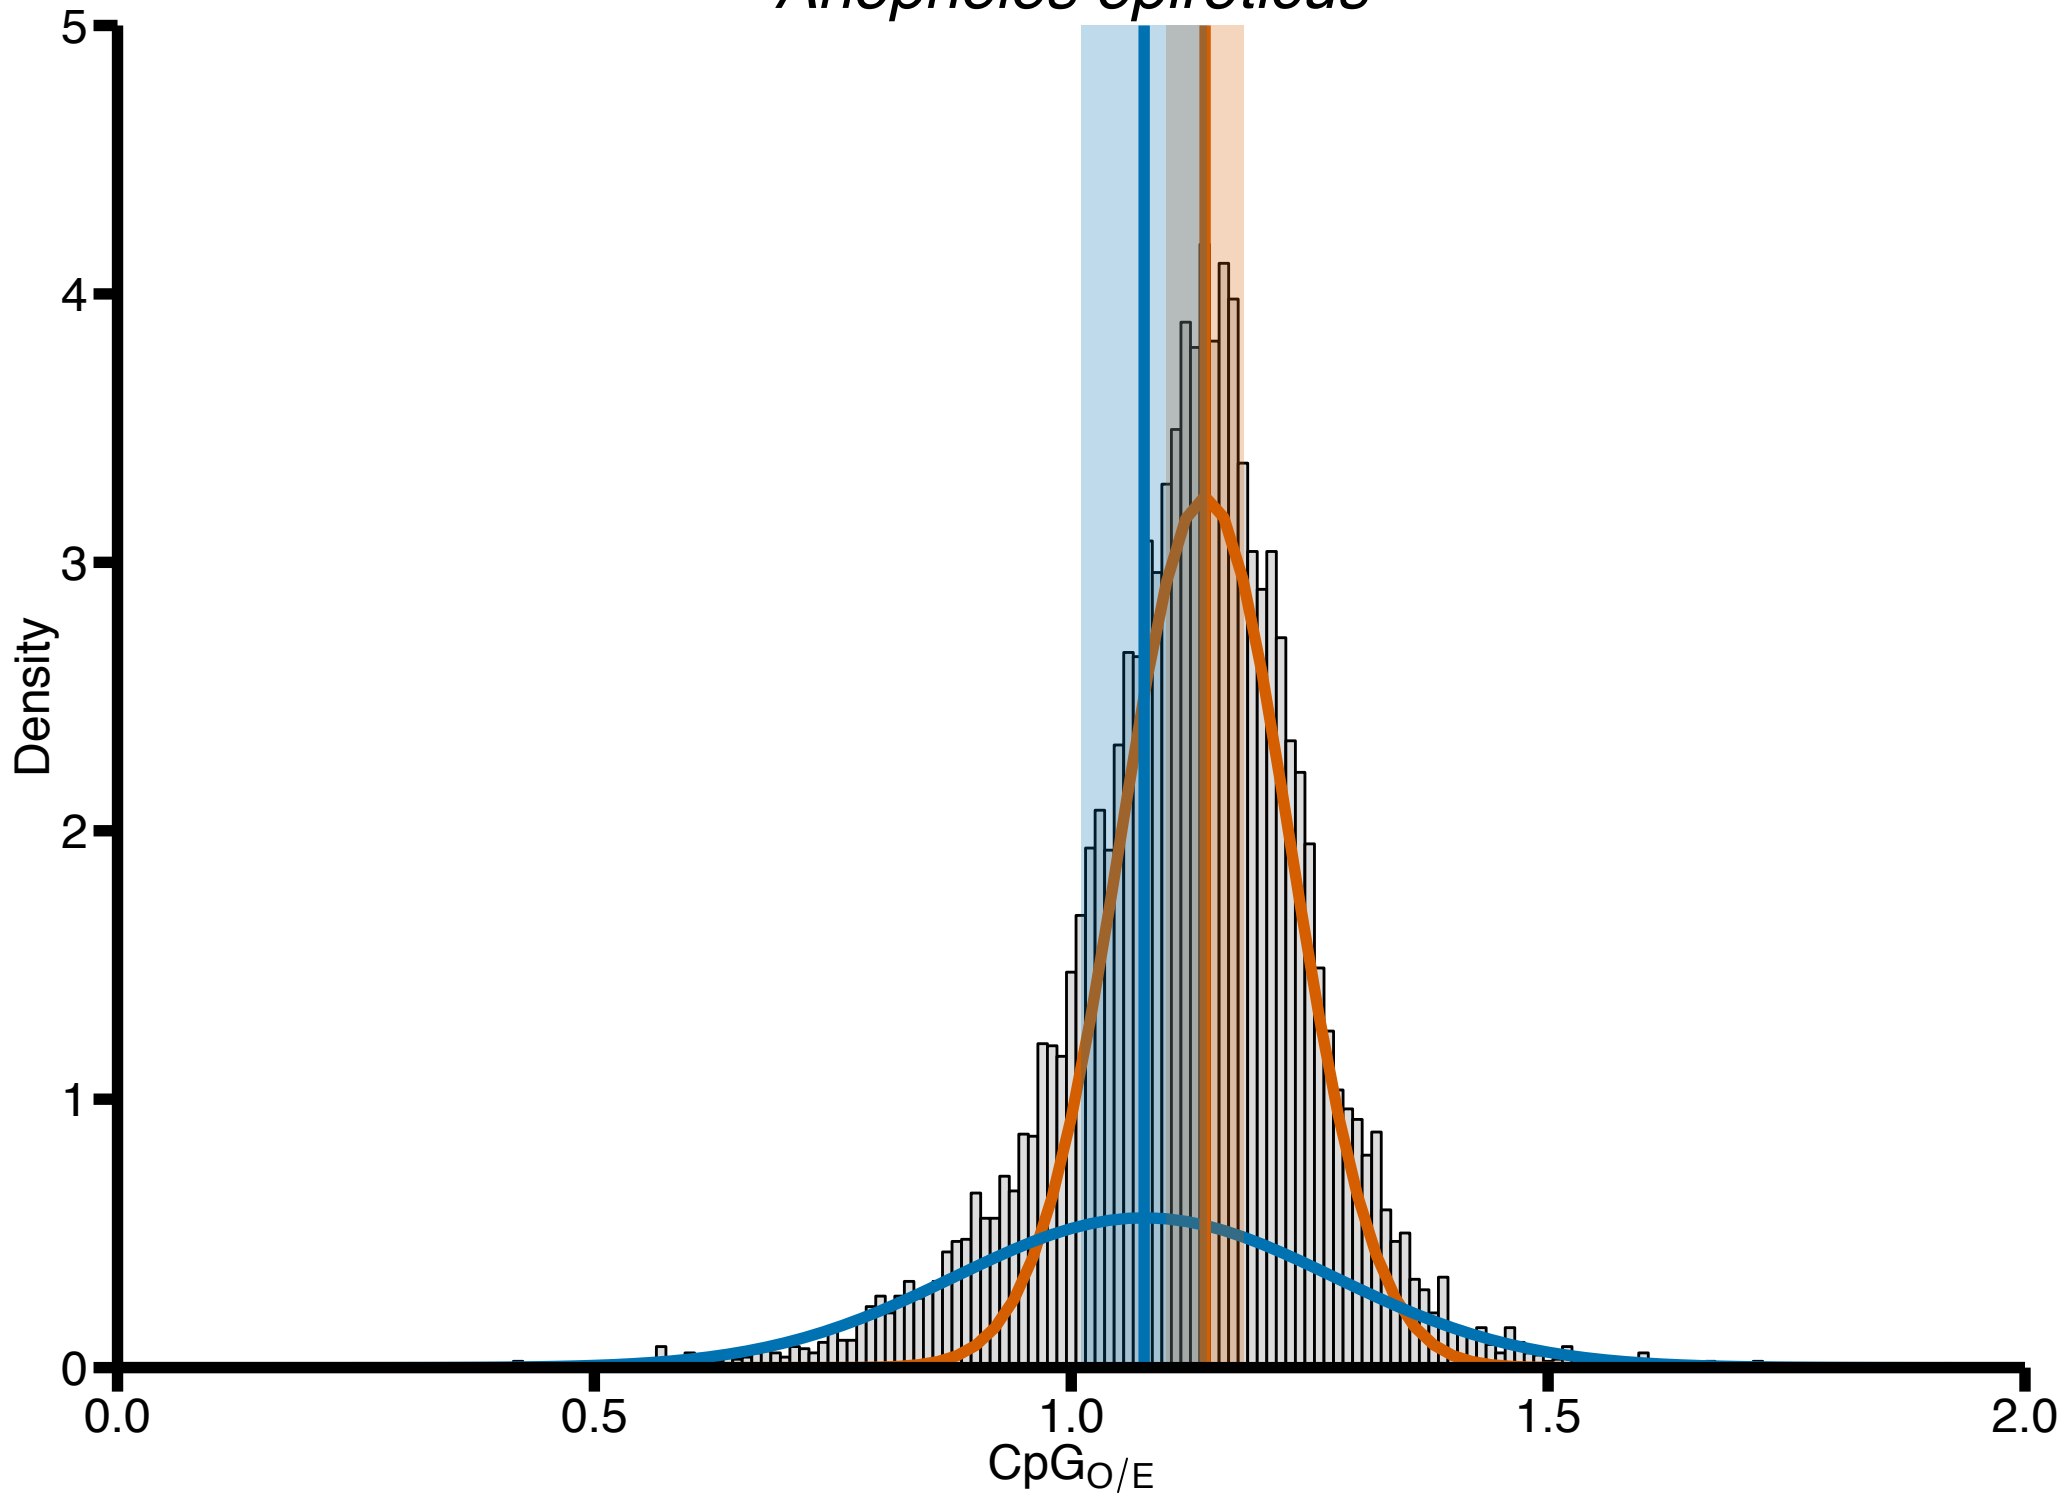

*Anopheles farauti*

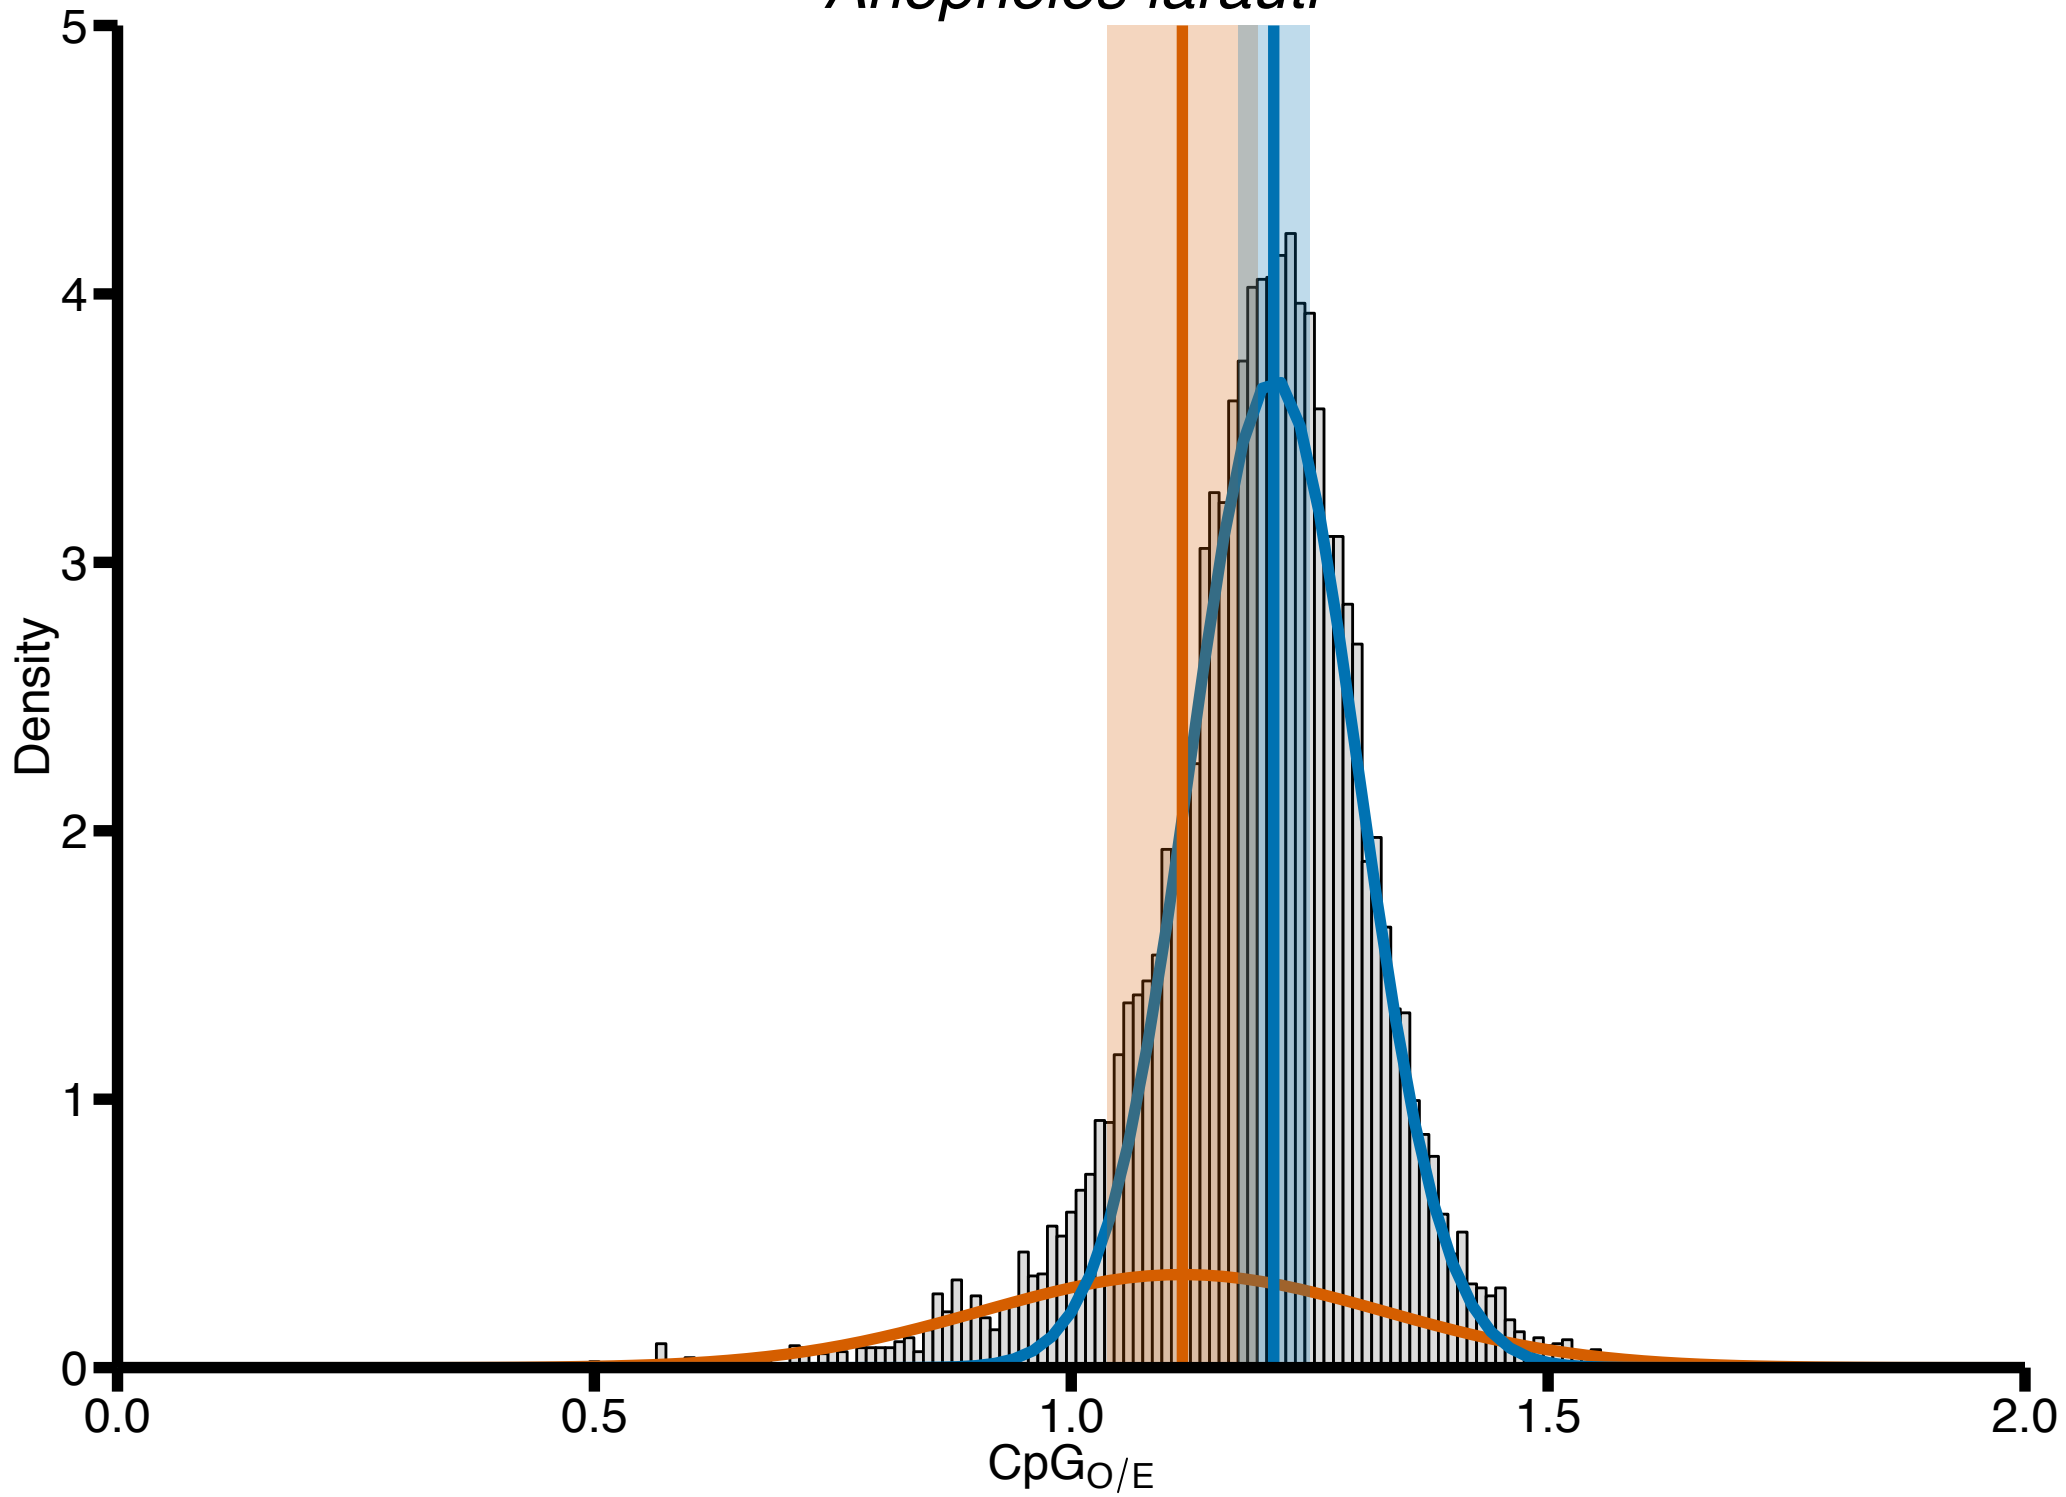

*Anopheles funestus*

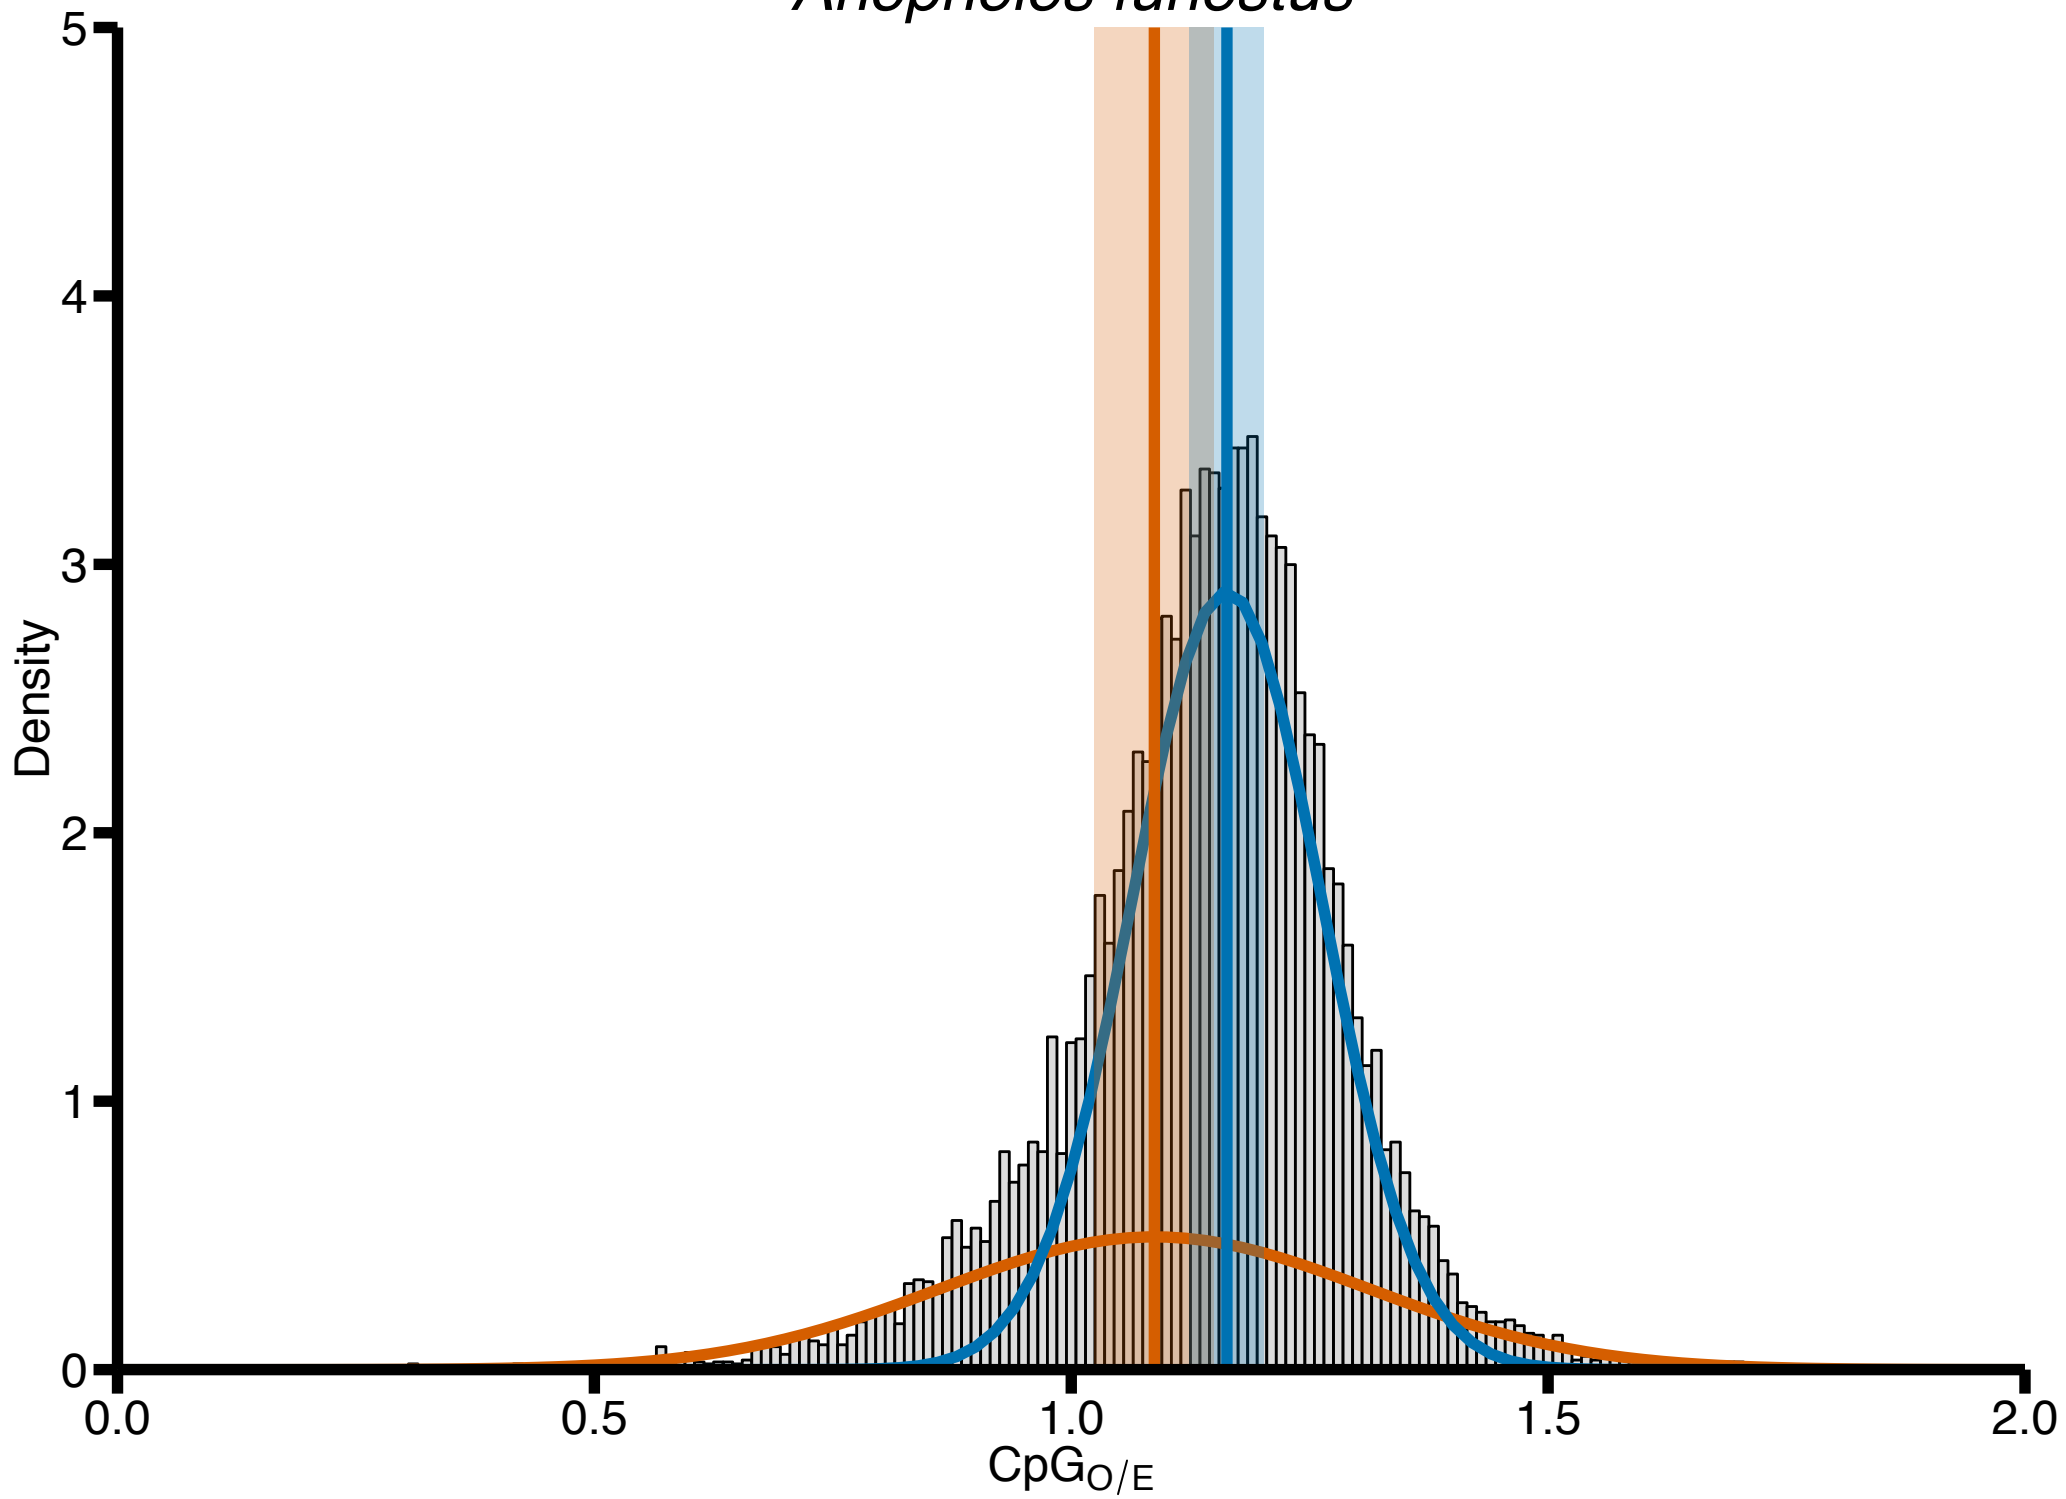

*Anopheles gambiae*

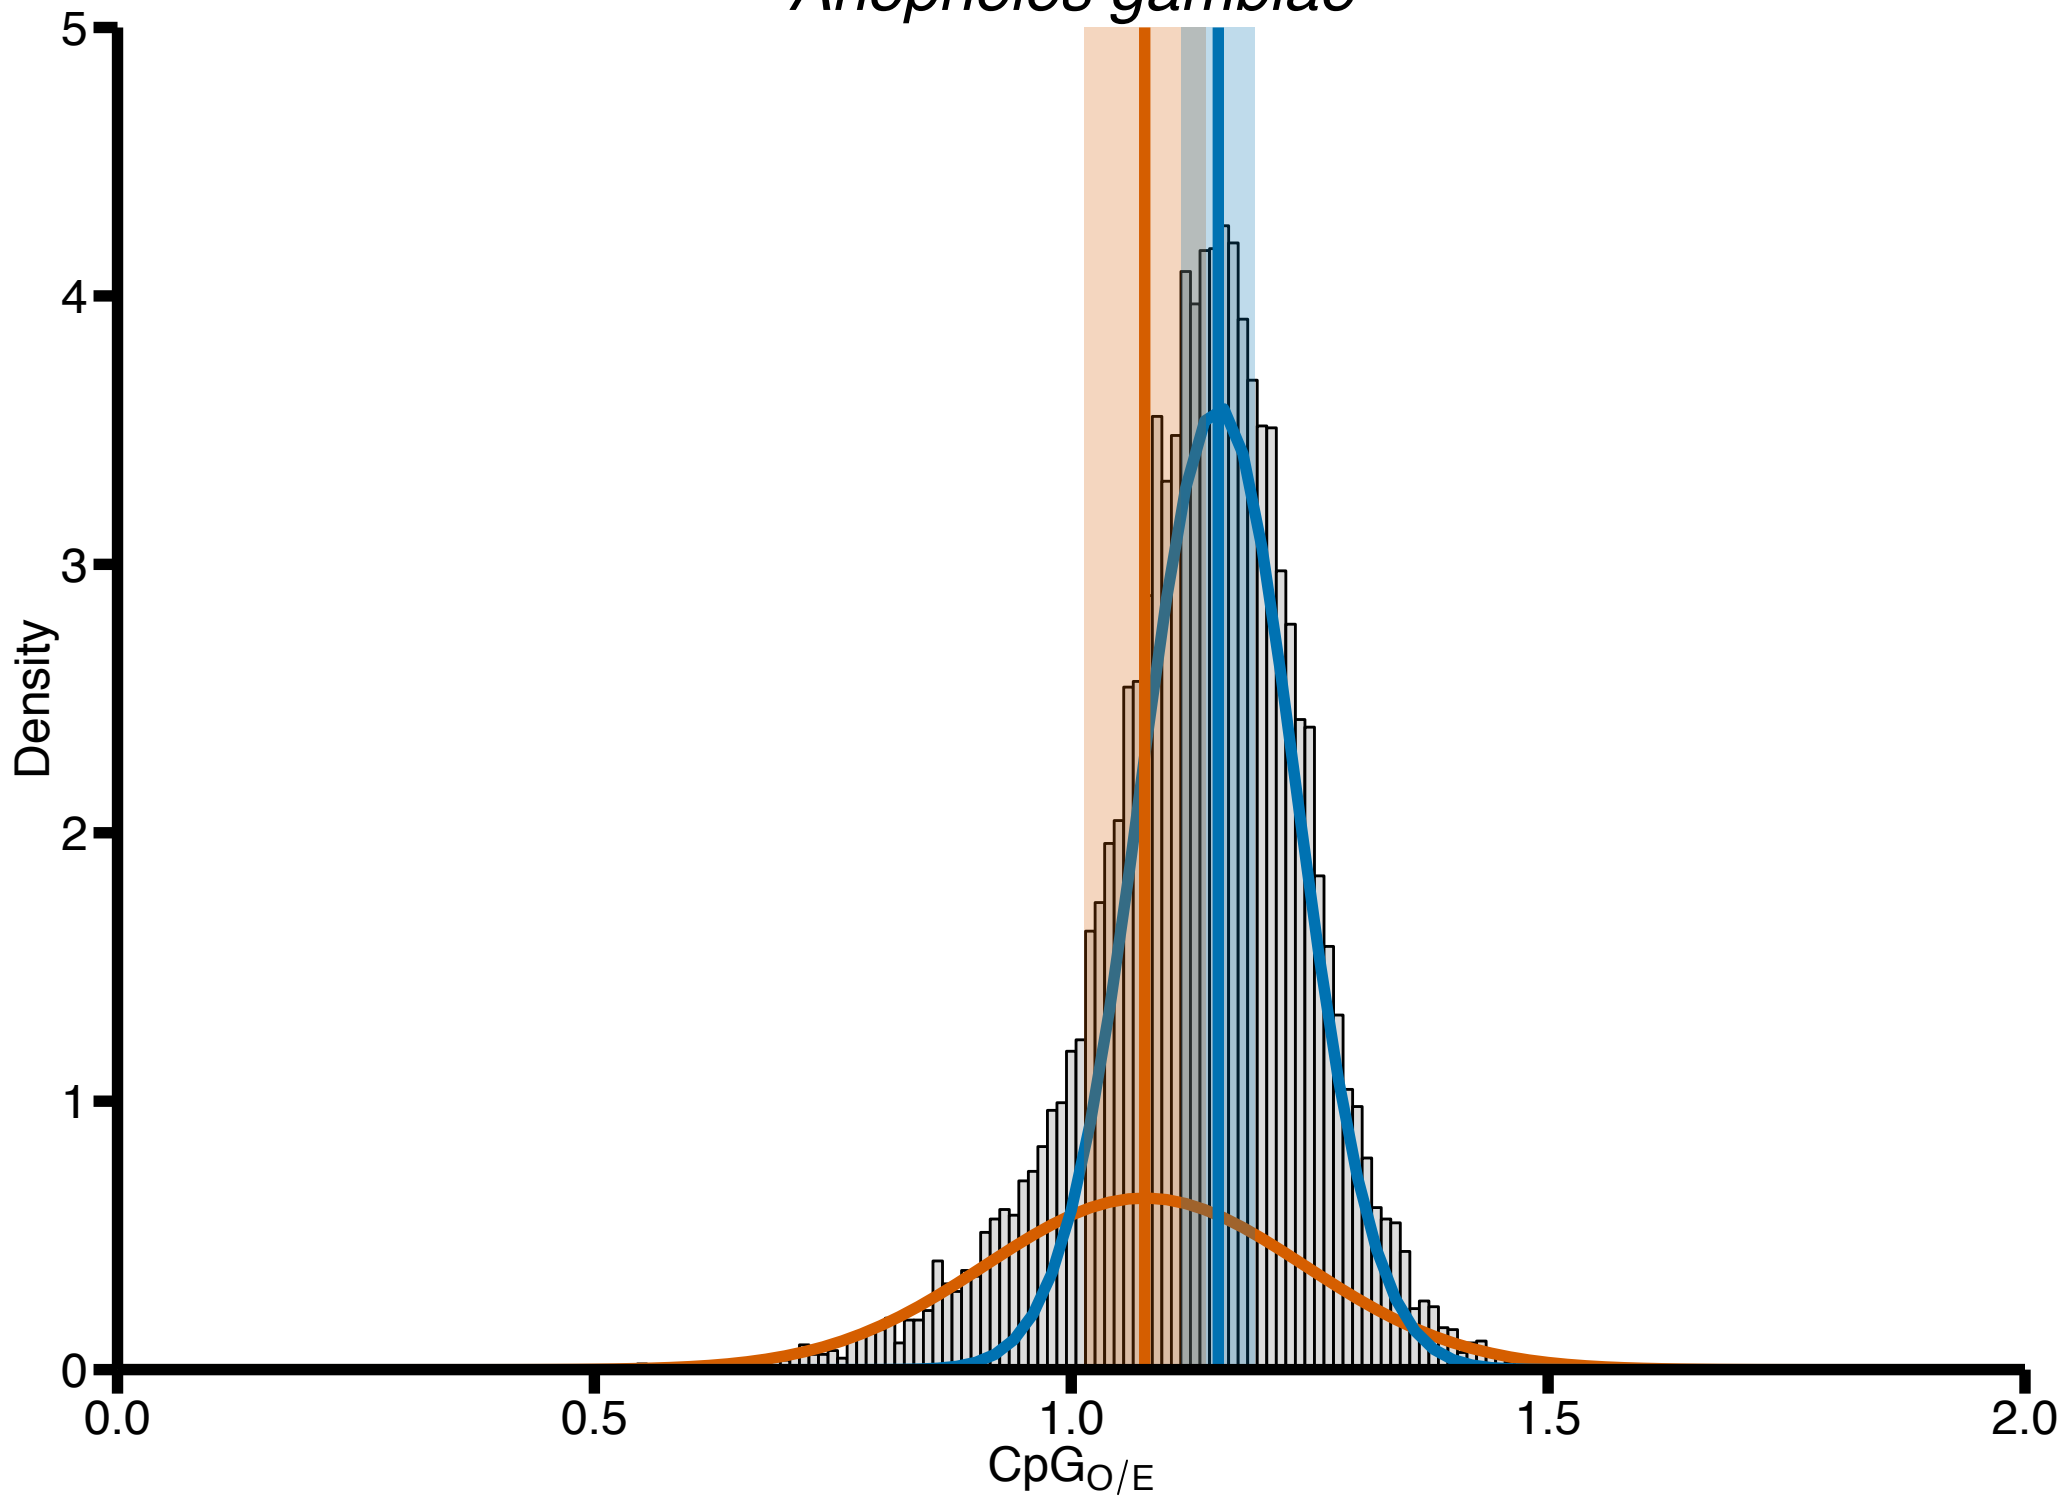

*Anopheles maculatus*

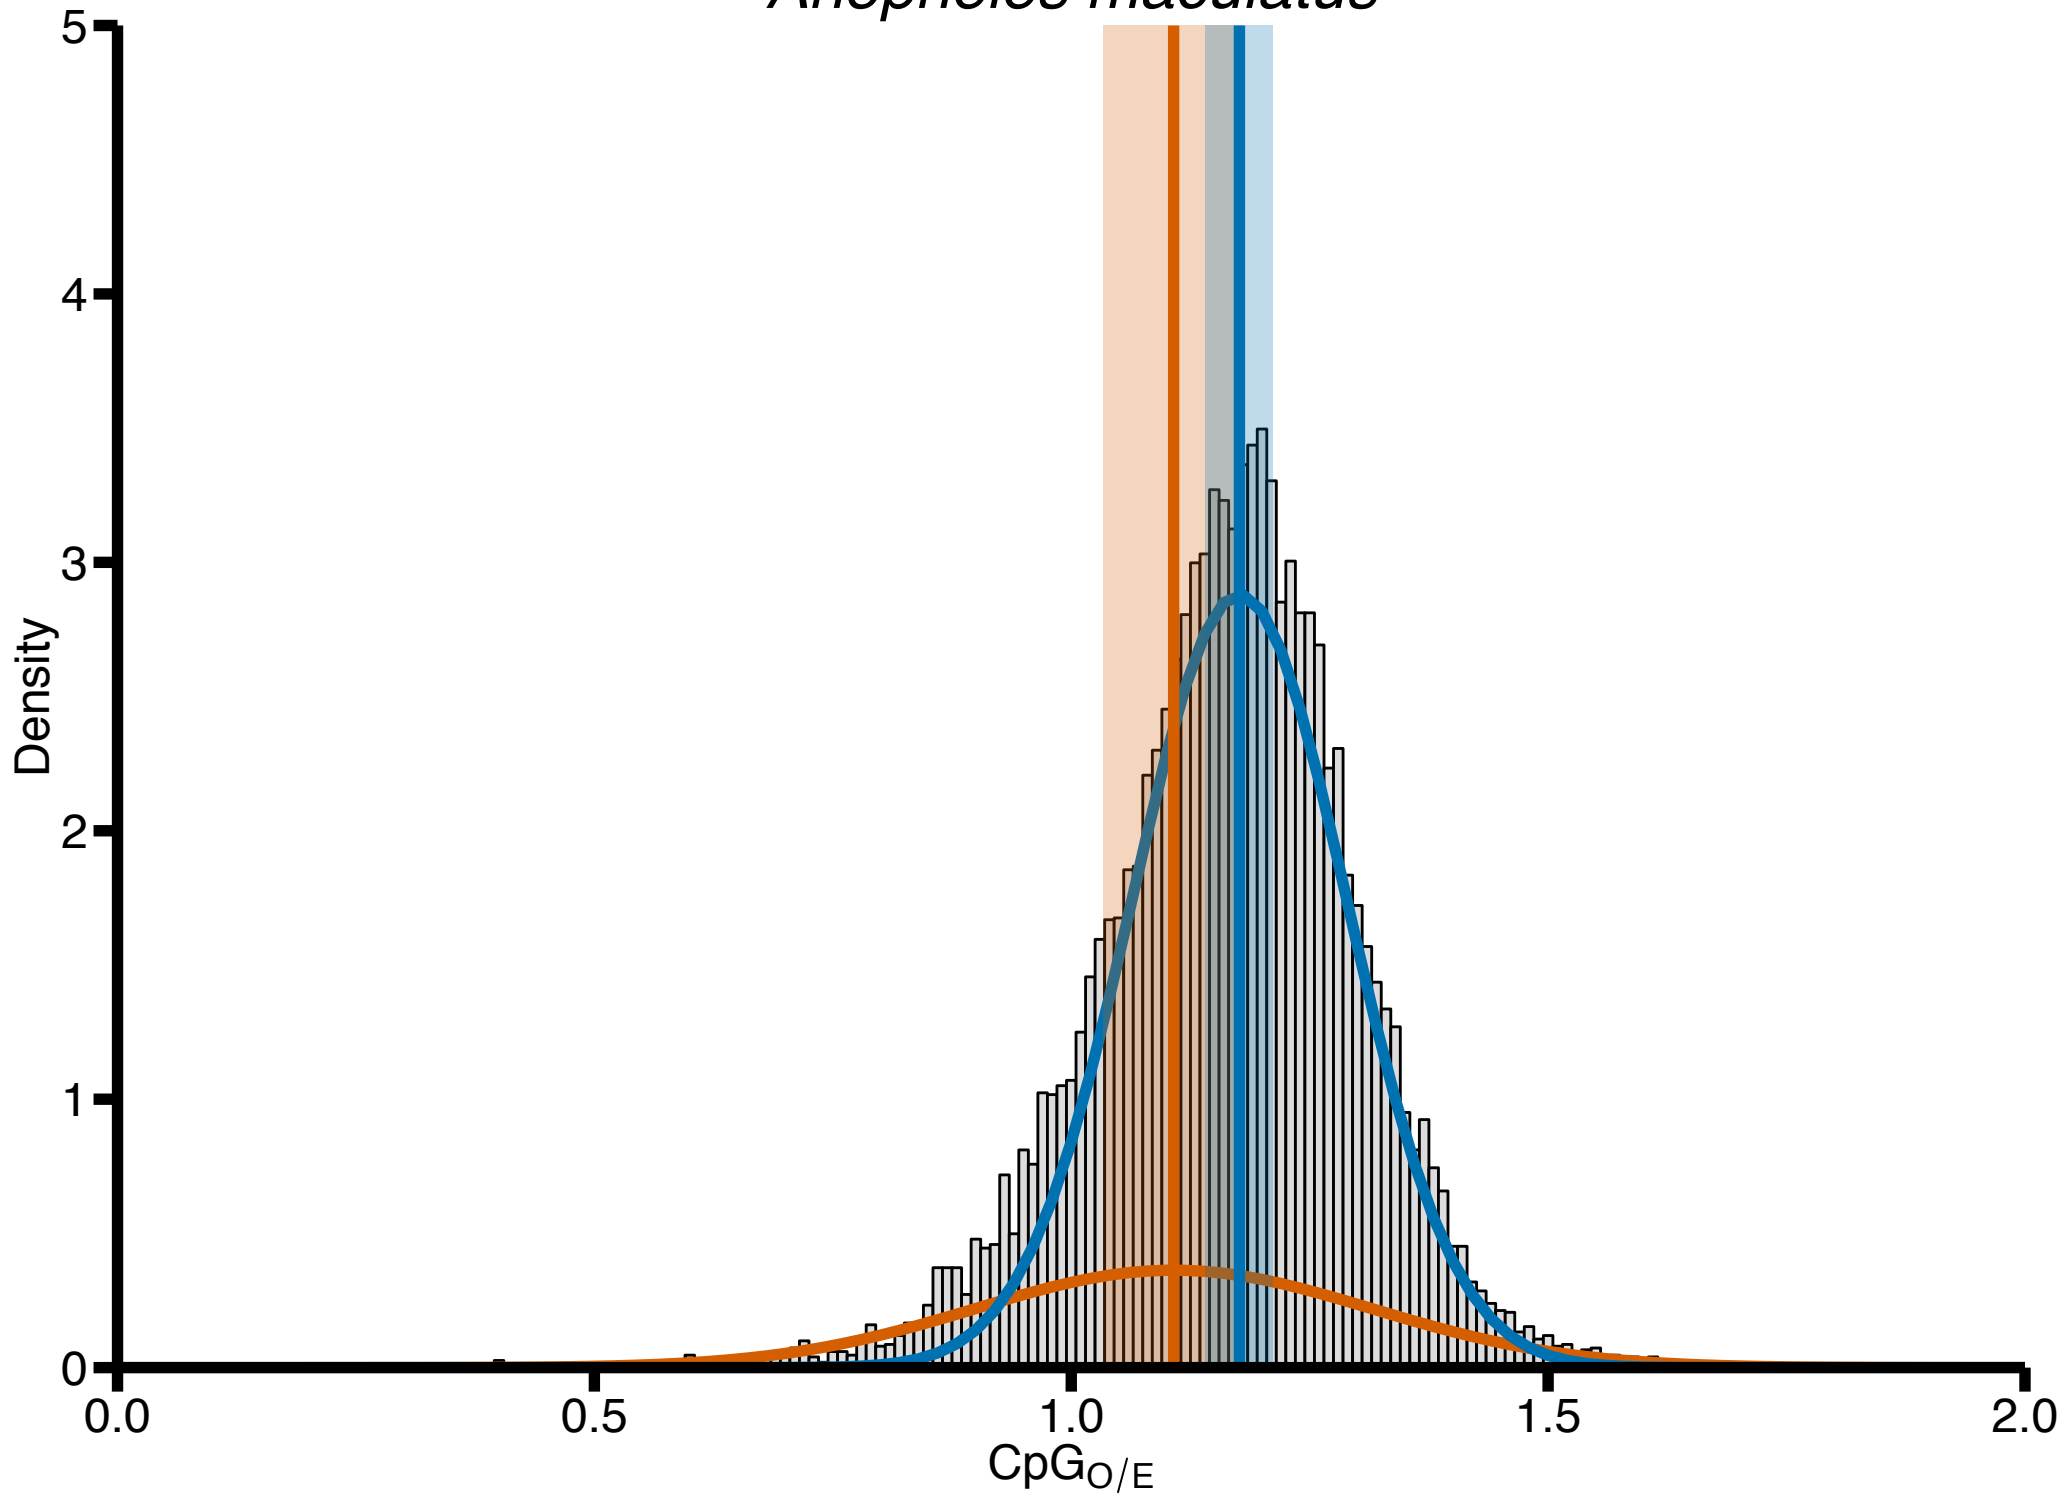



*Anopheles melas*

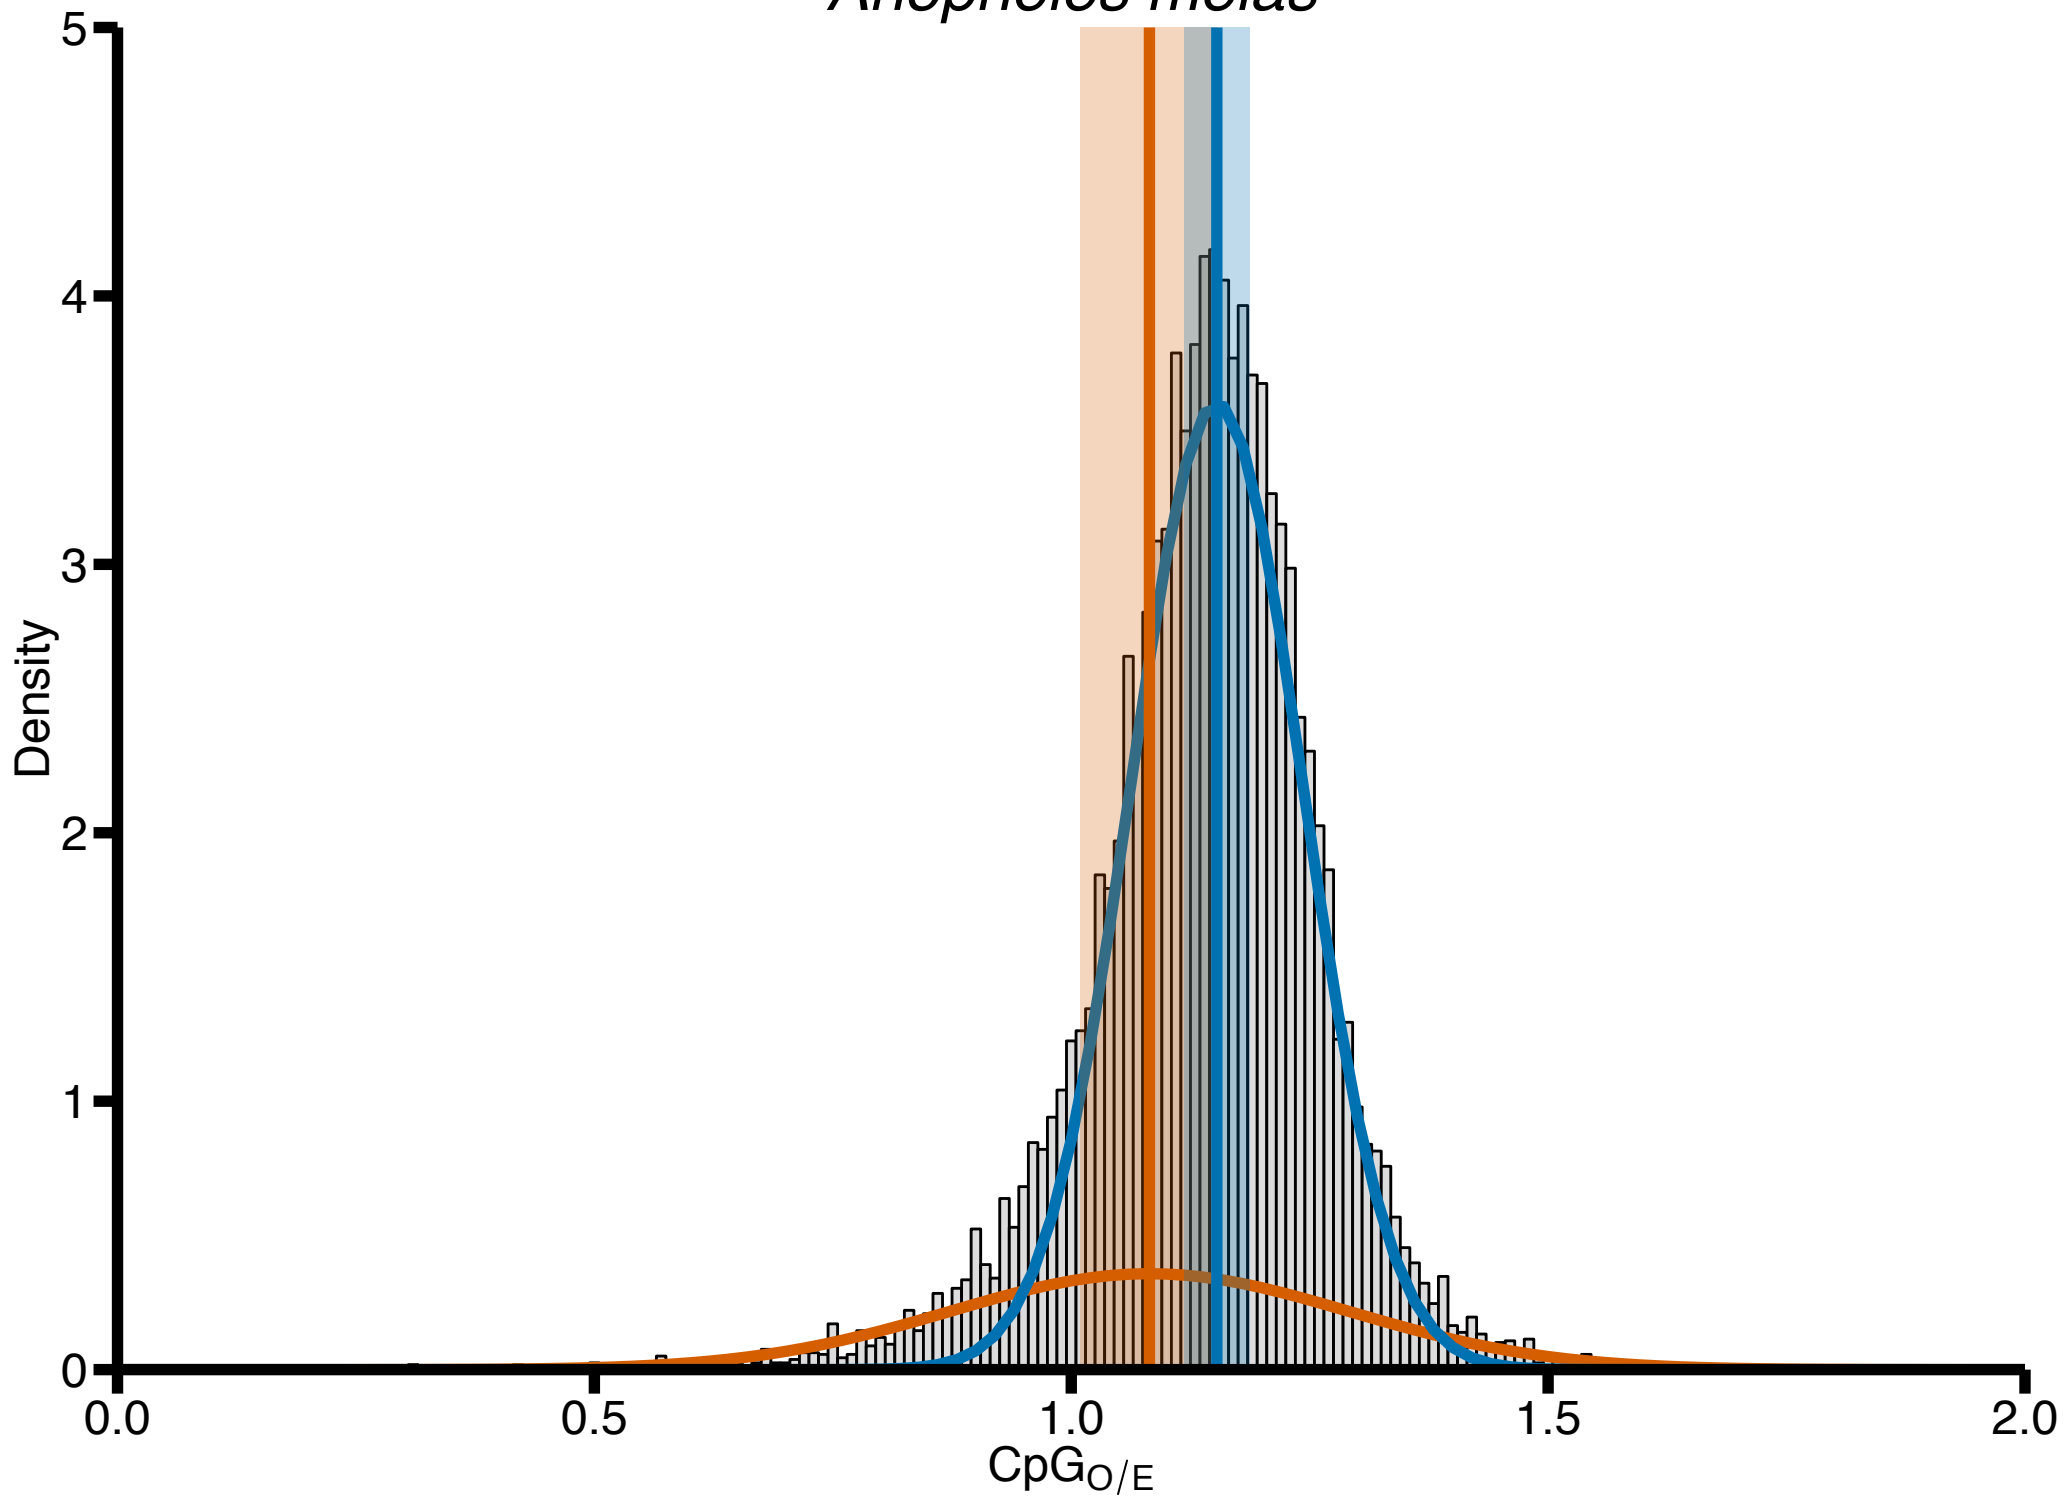

*Anopheles merus*

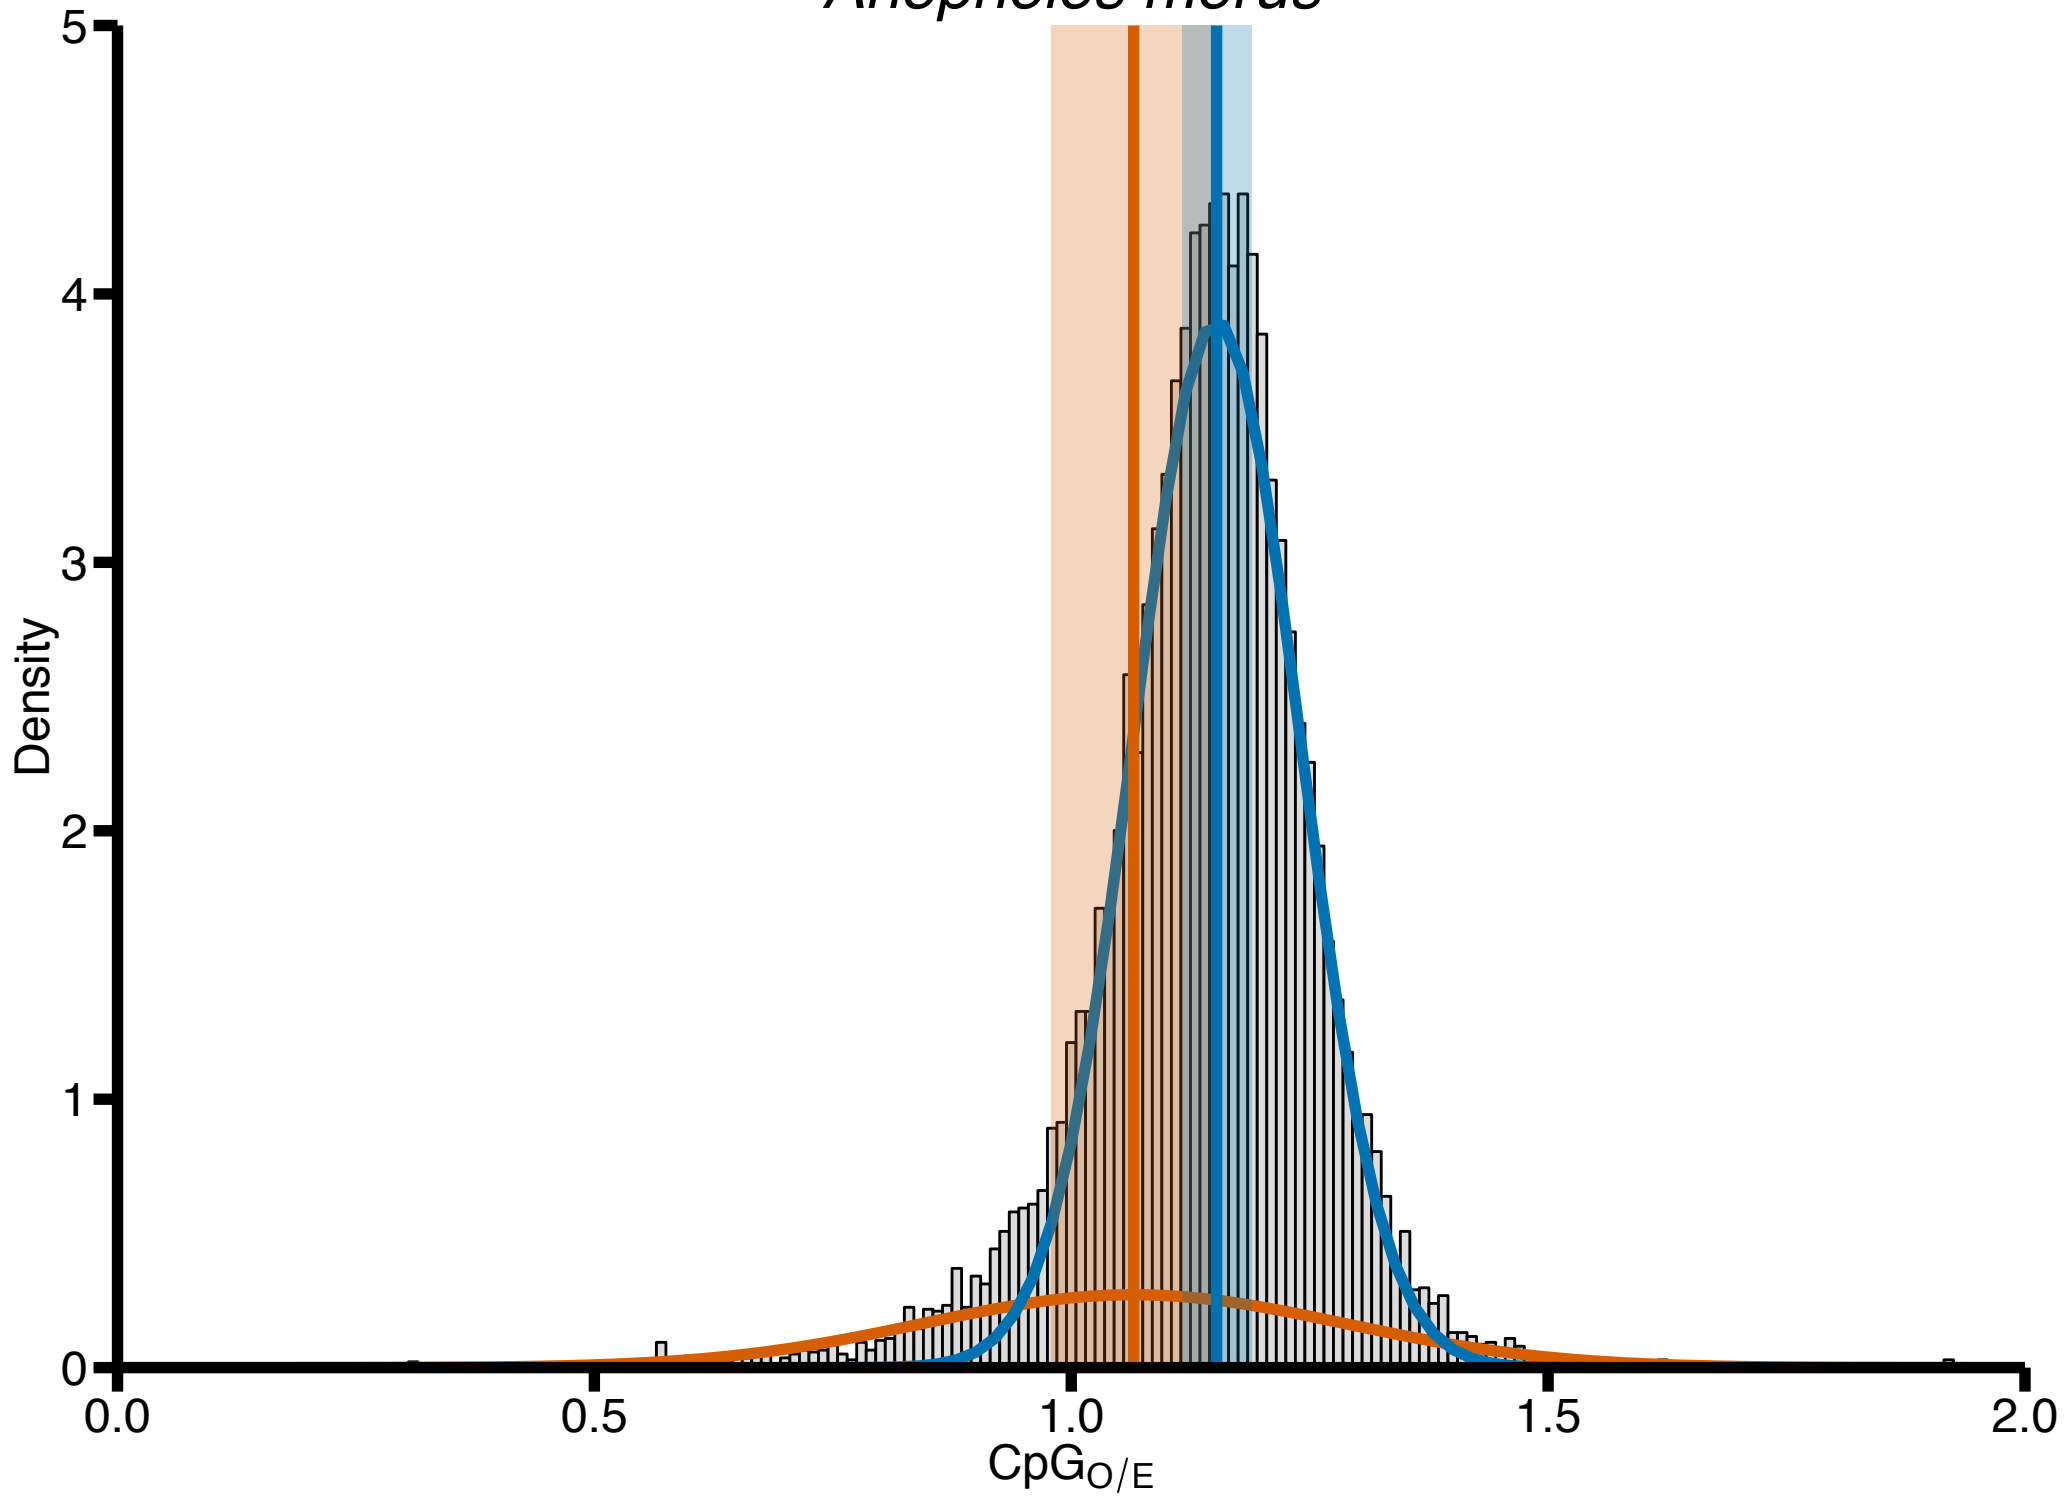

*Anopheles minimus*

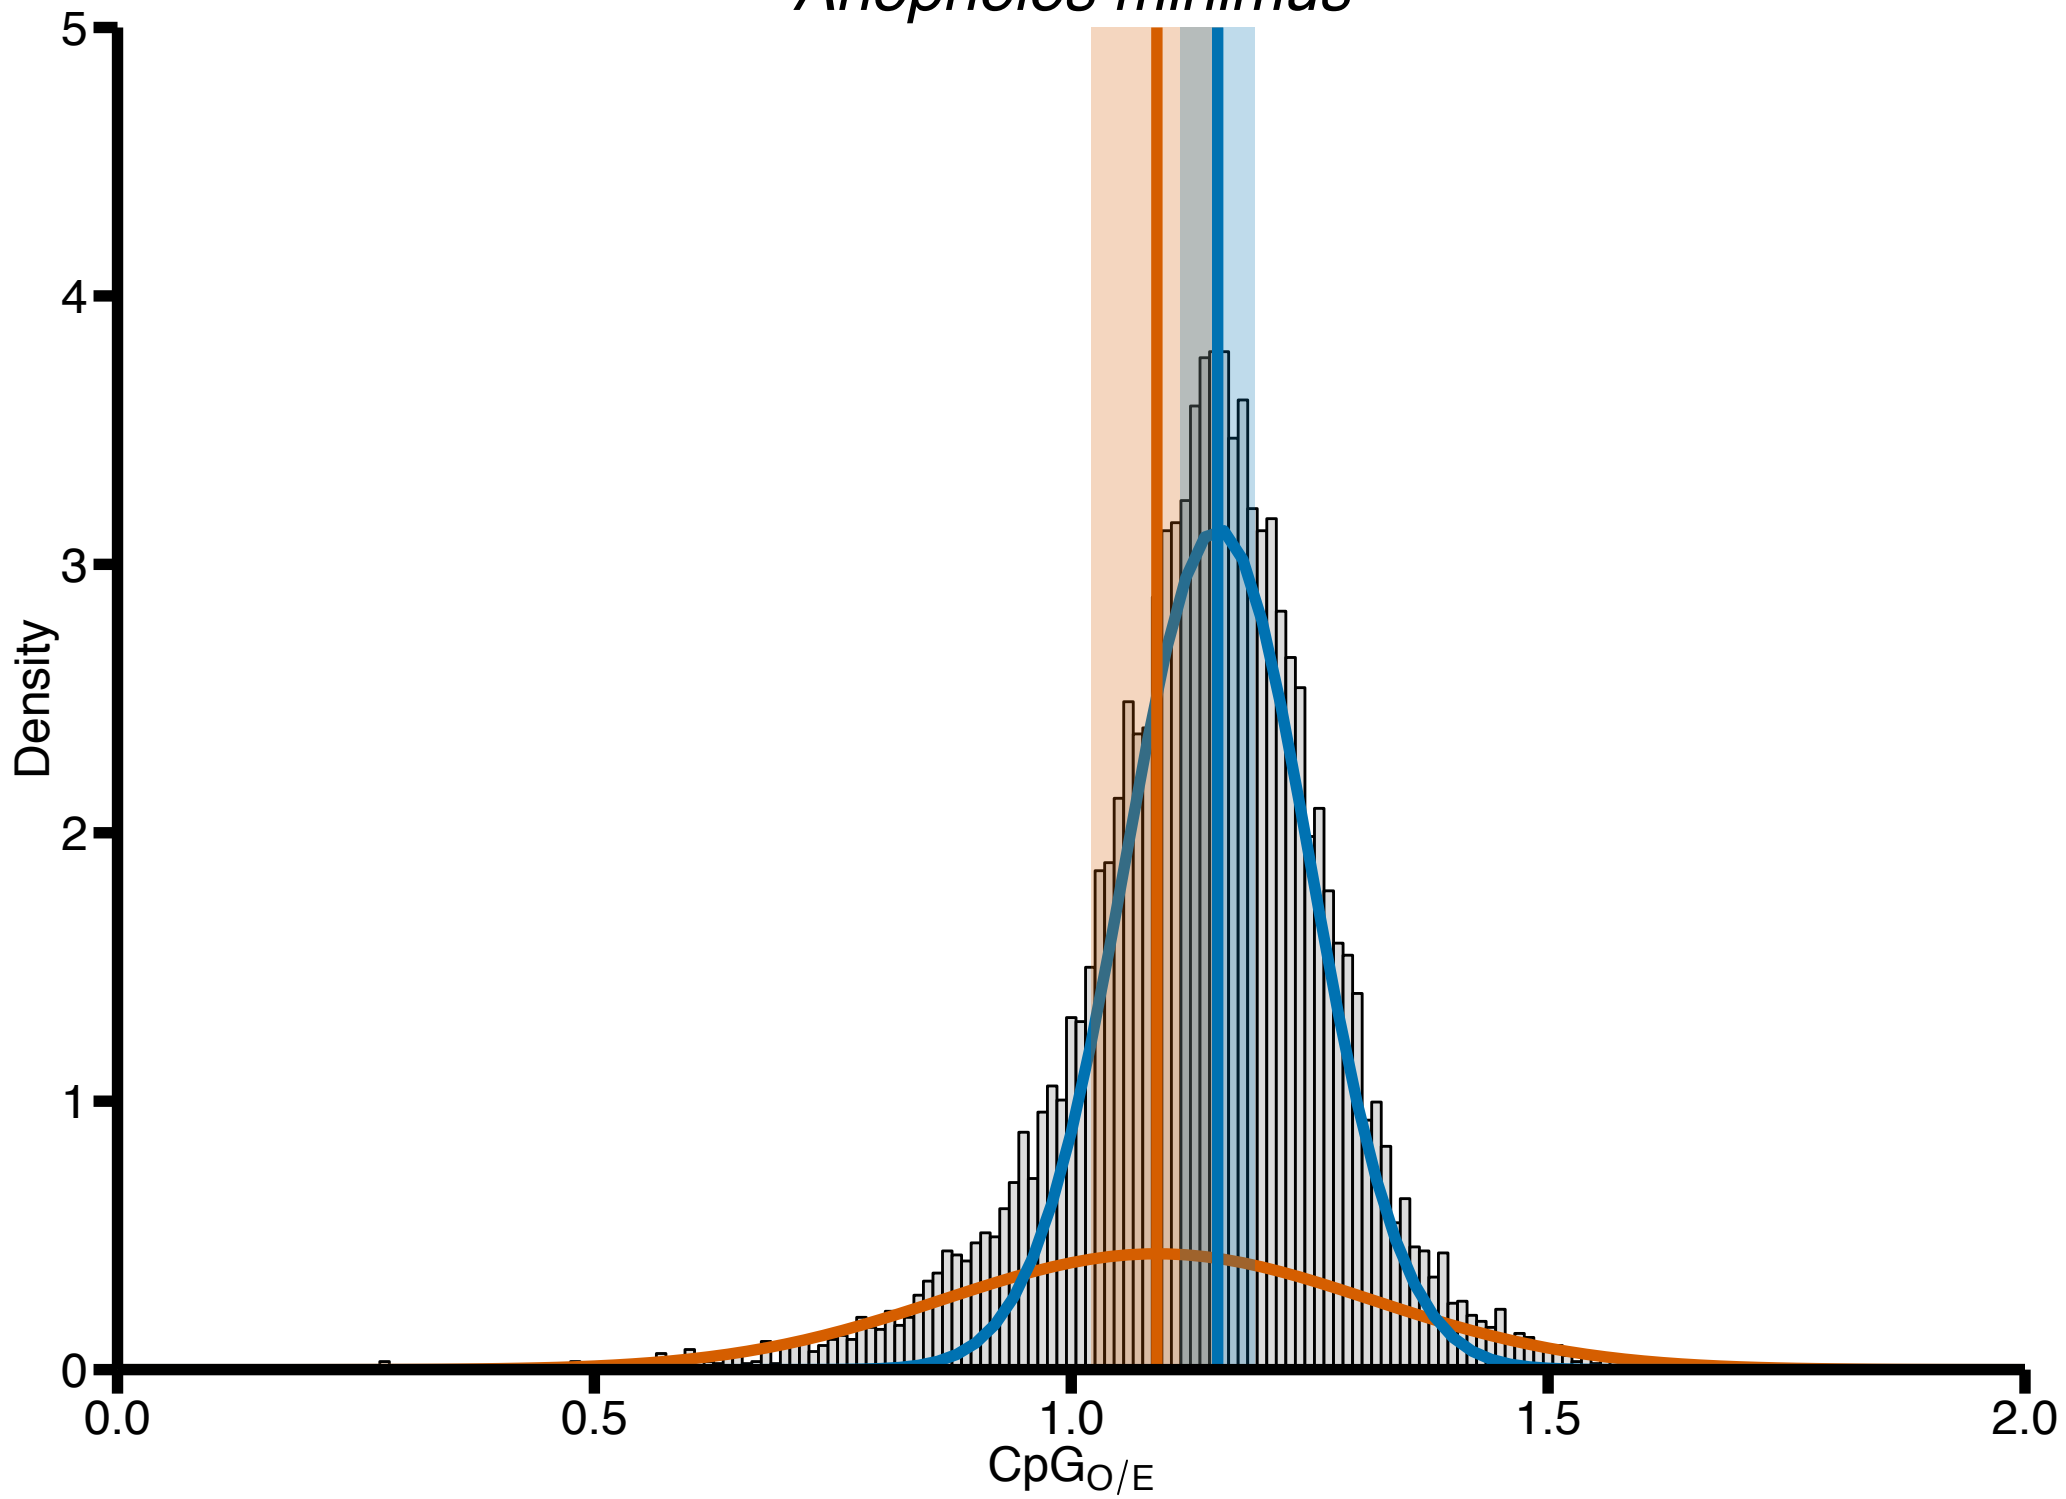

*Anopheles quadriannulatus*

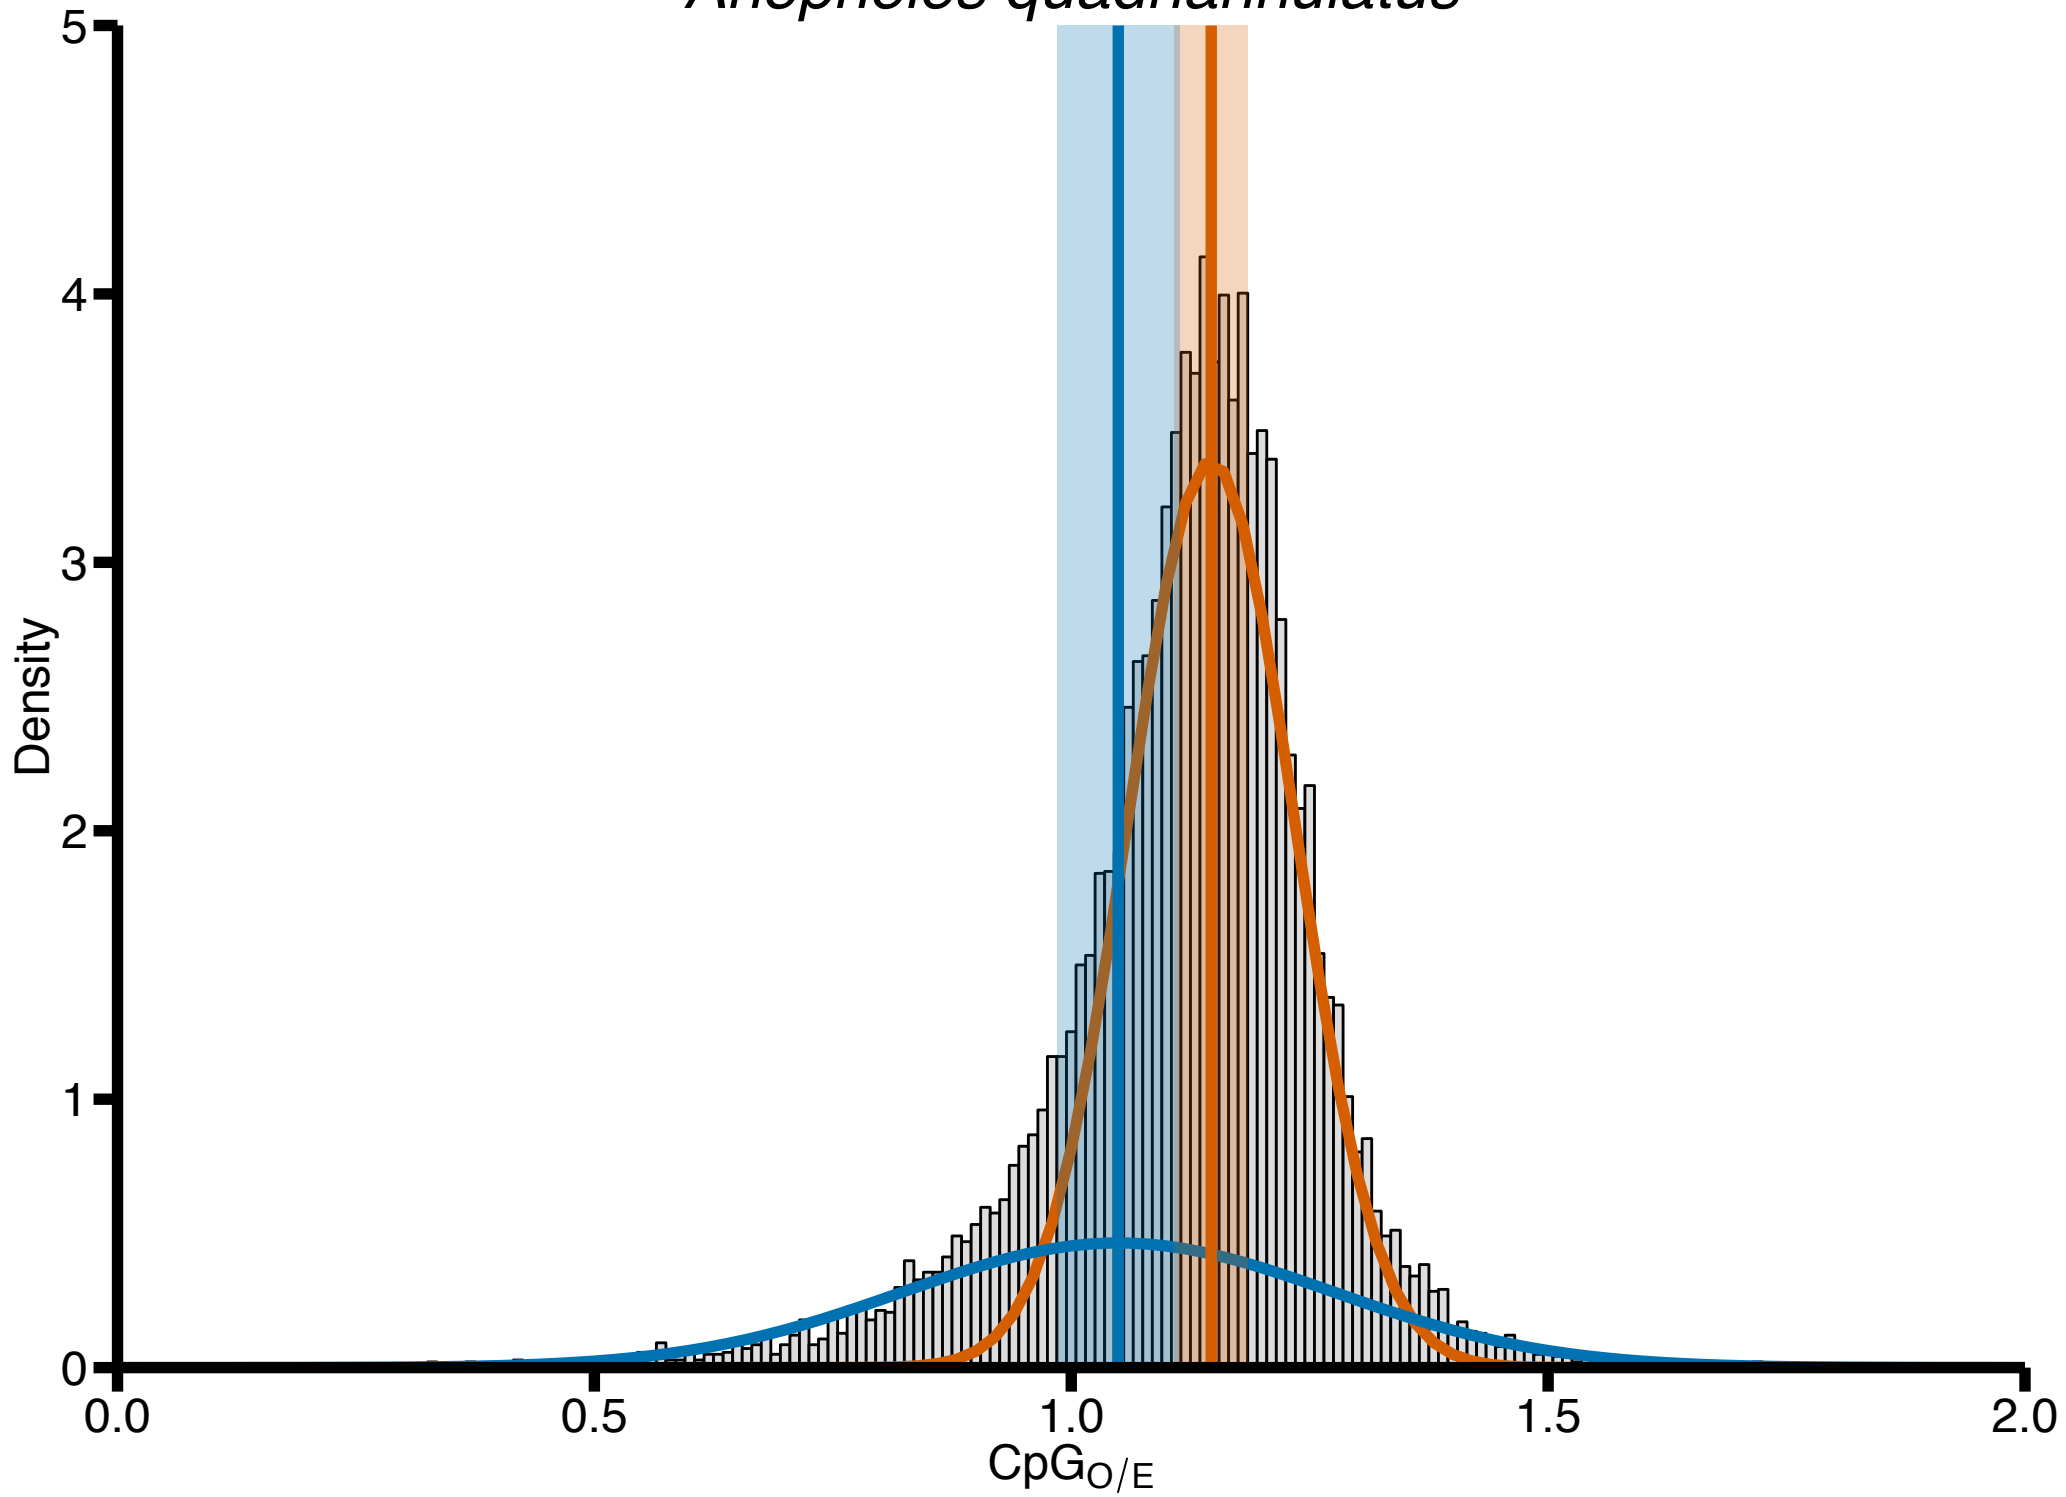

*Anopheles sinensis*

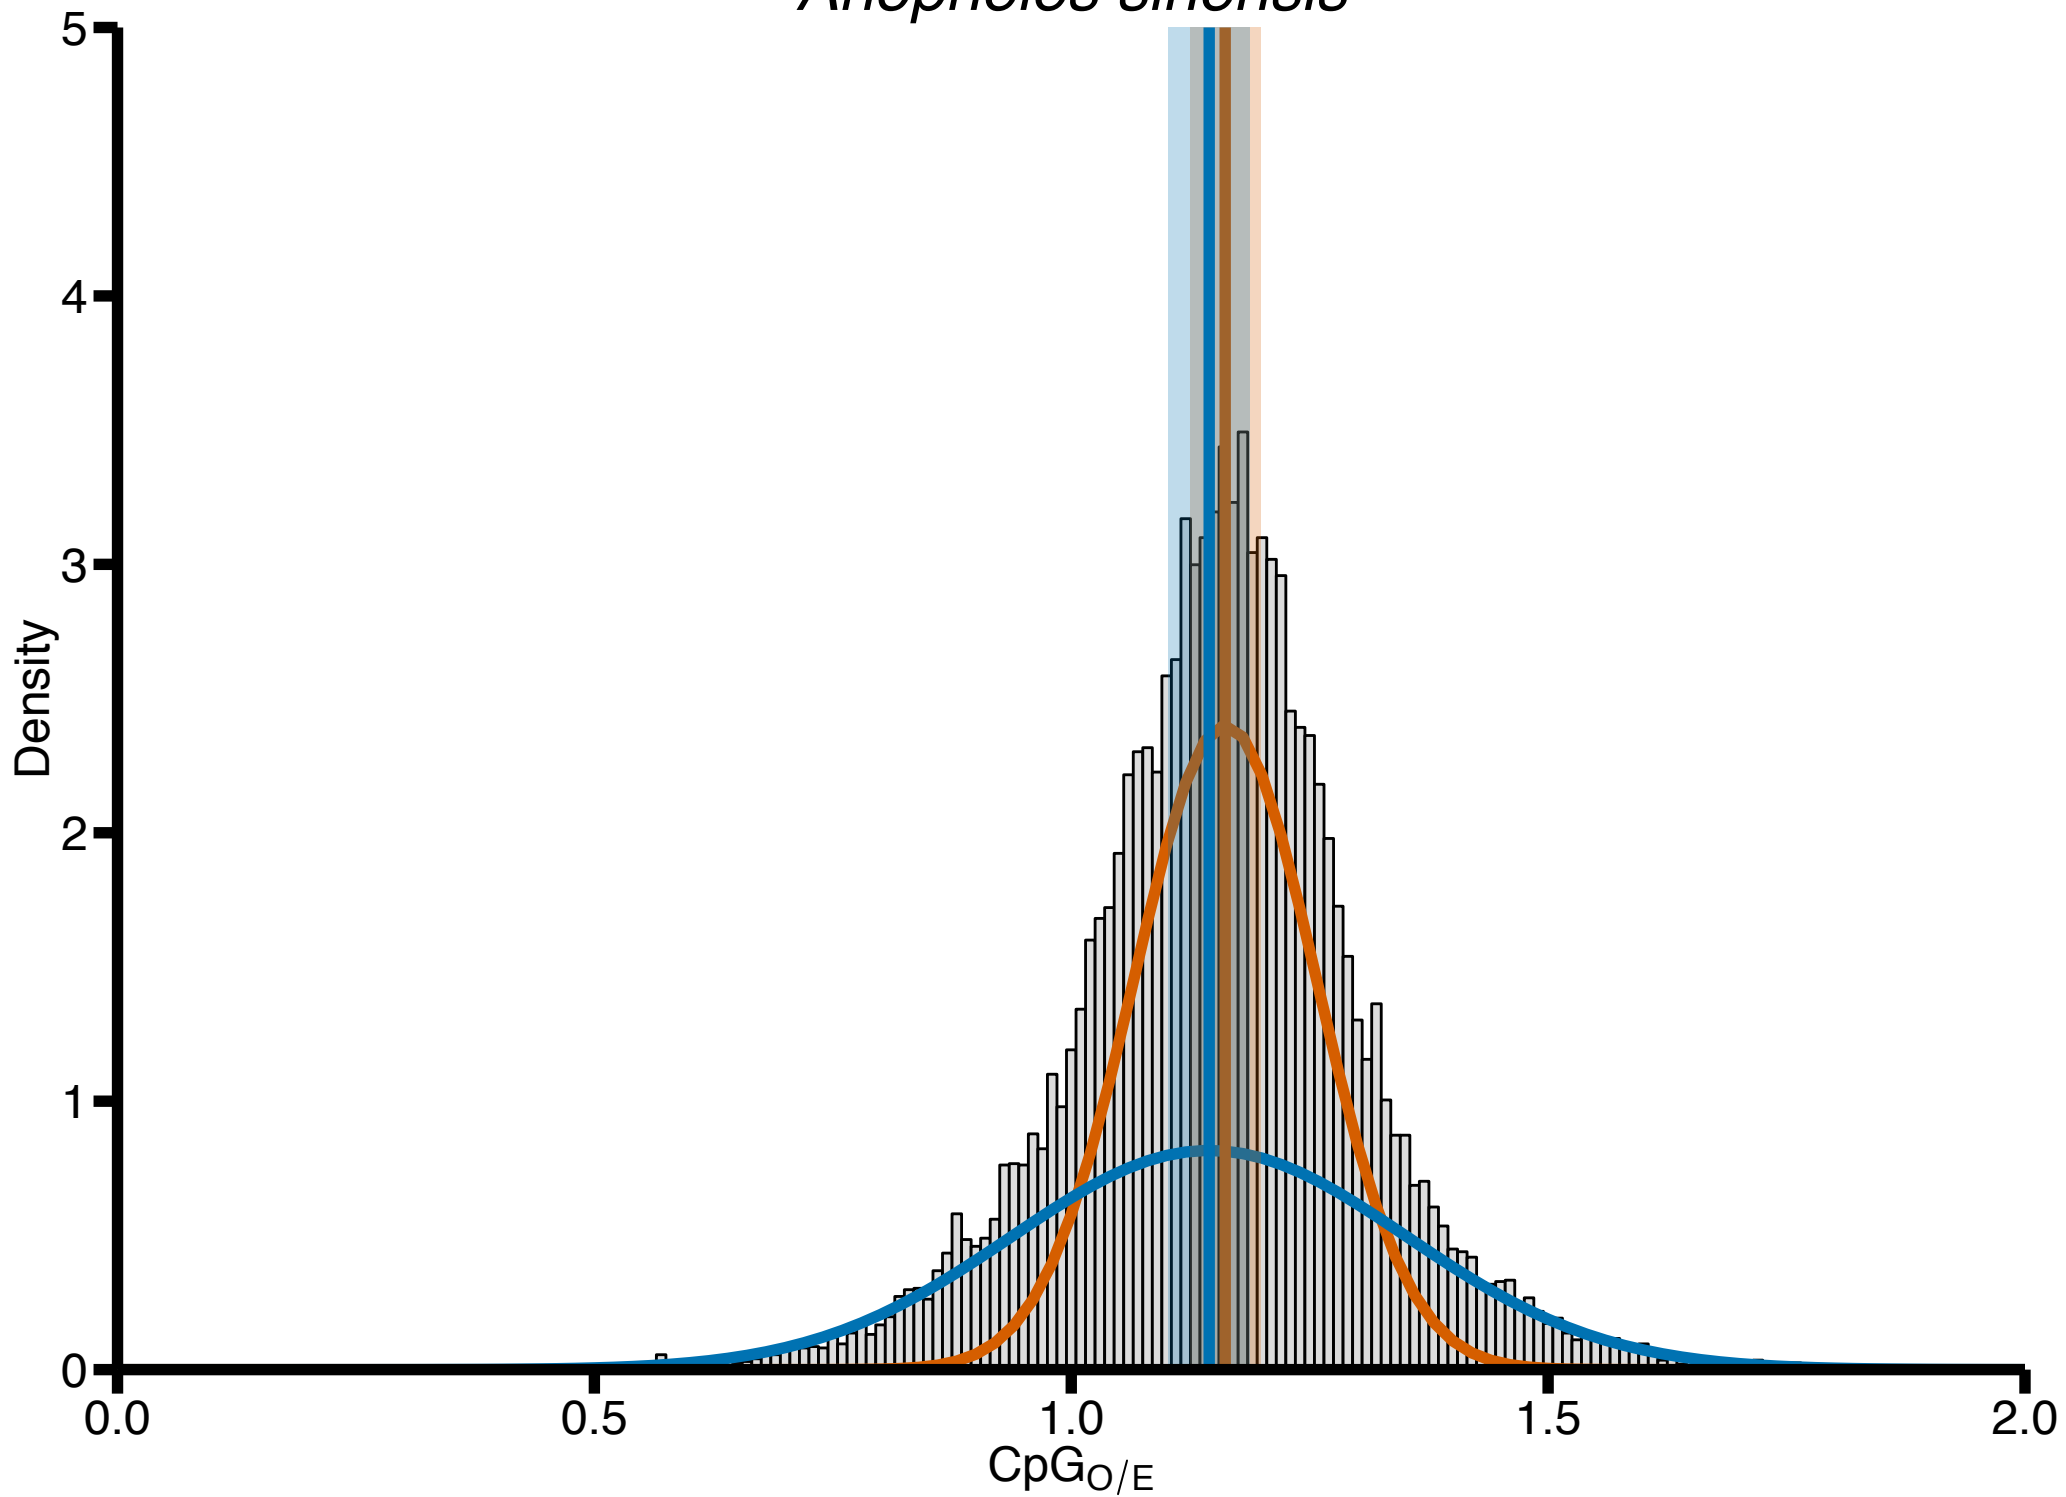

*Anopheles stephensi*

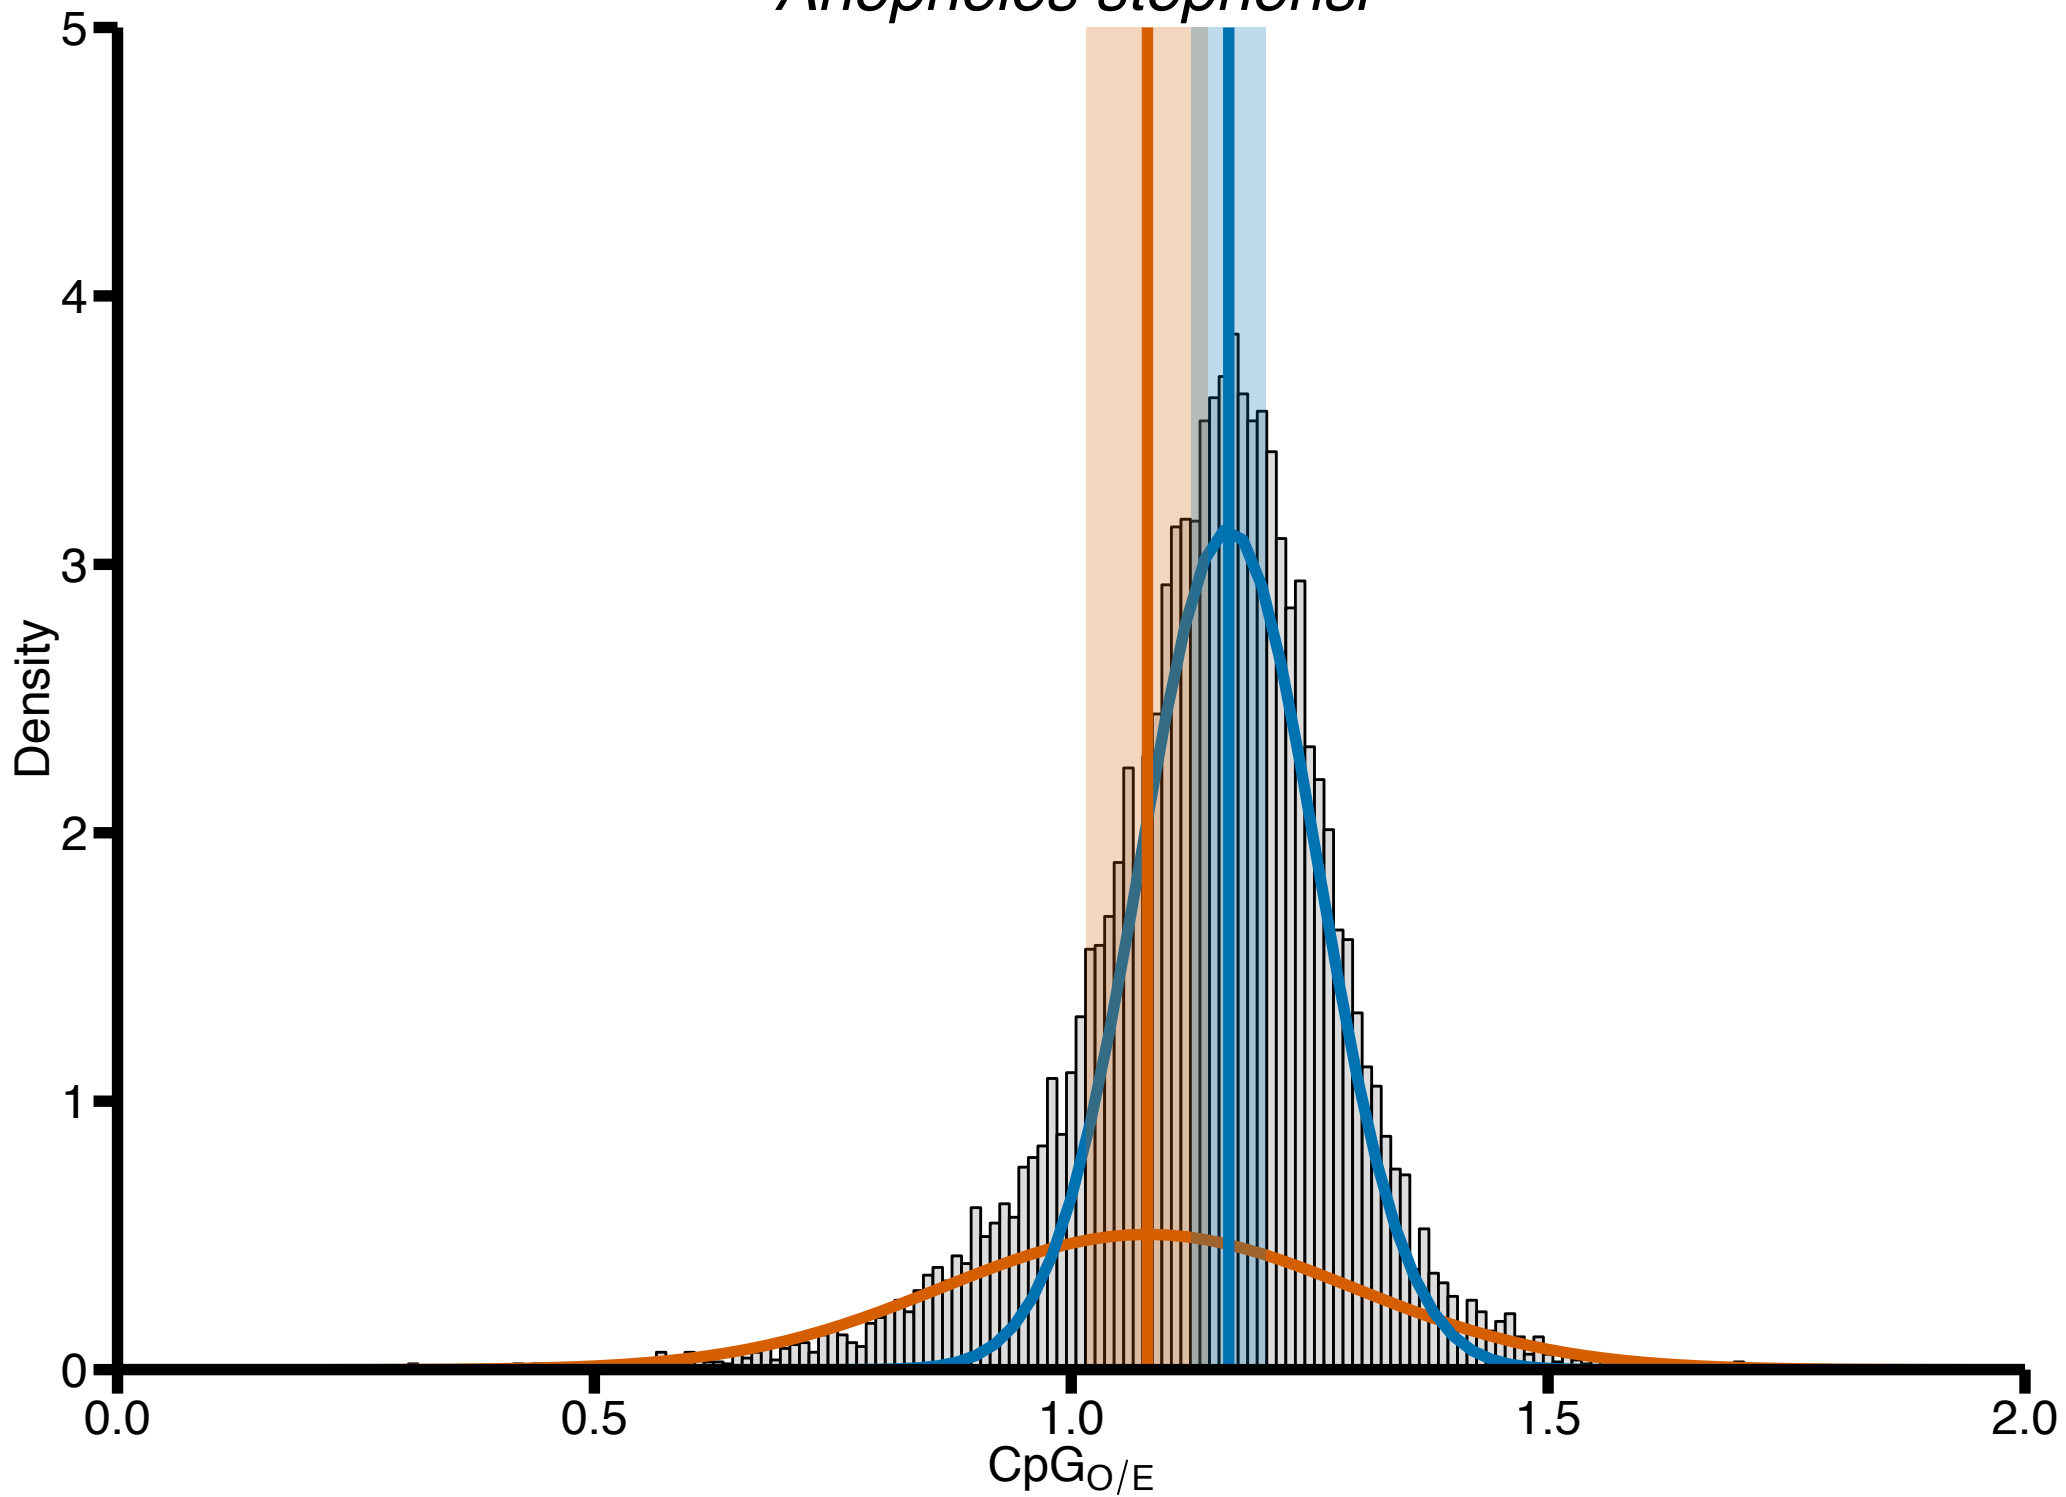

*Bactrocera cucurbitae*

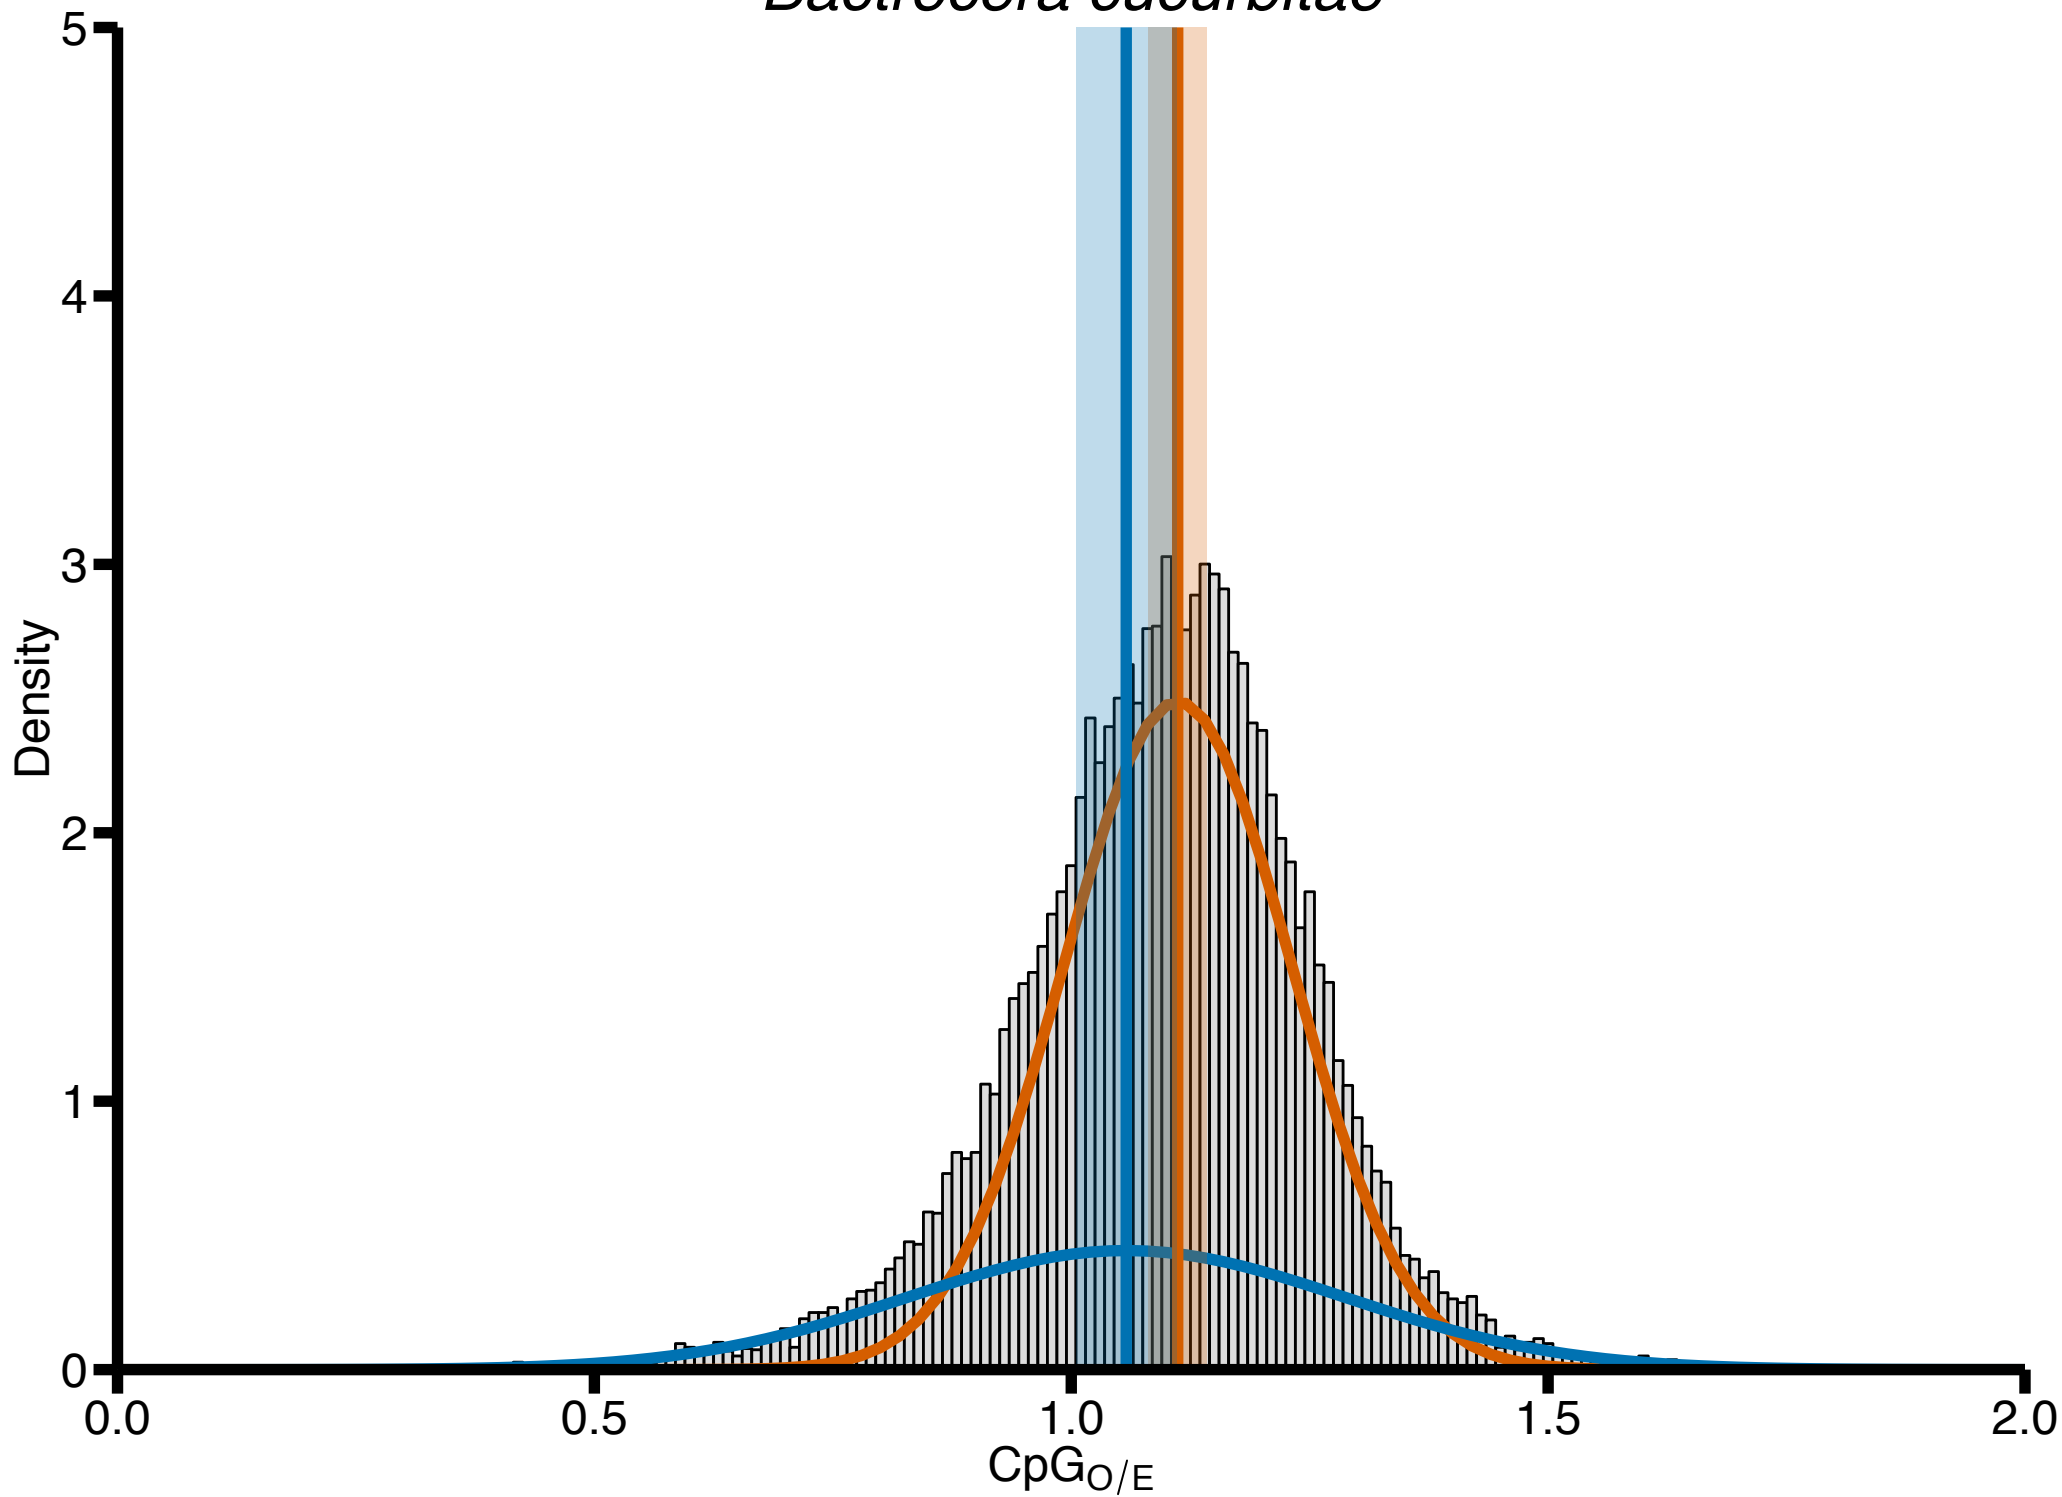

*Bactrocera dorsalis*

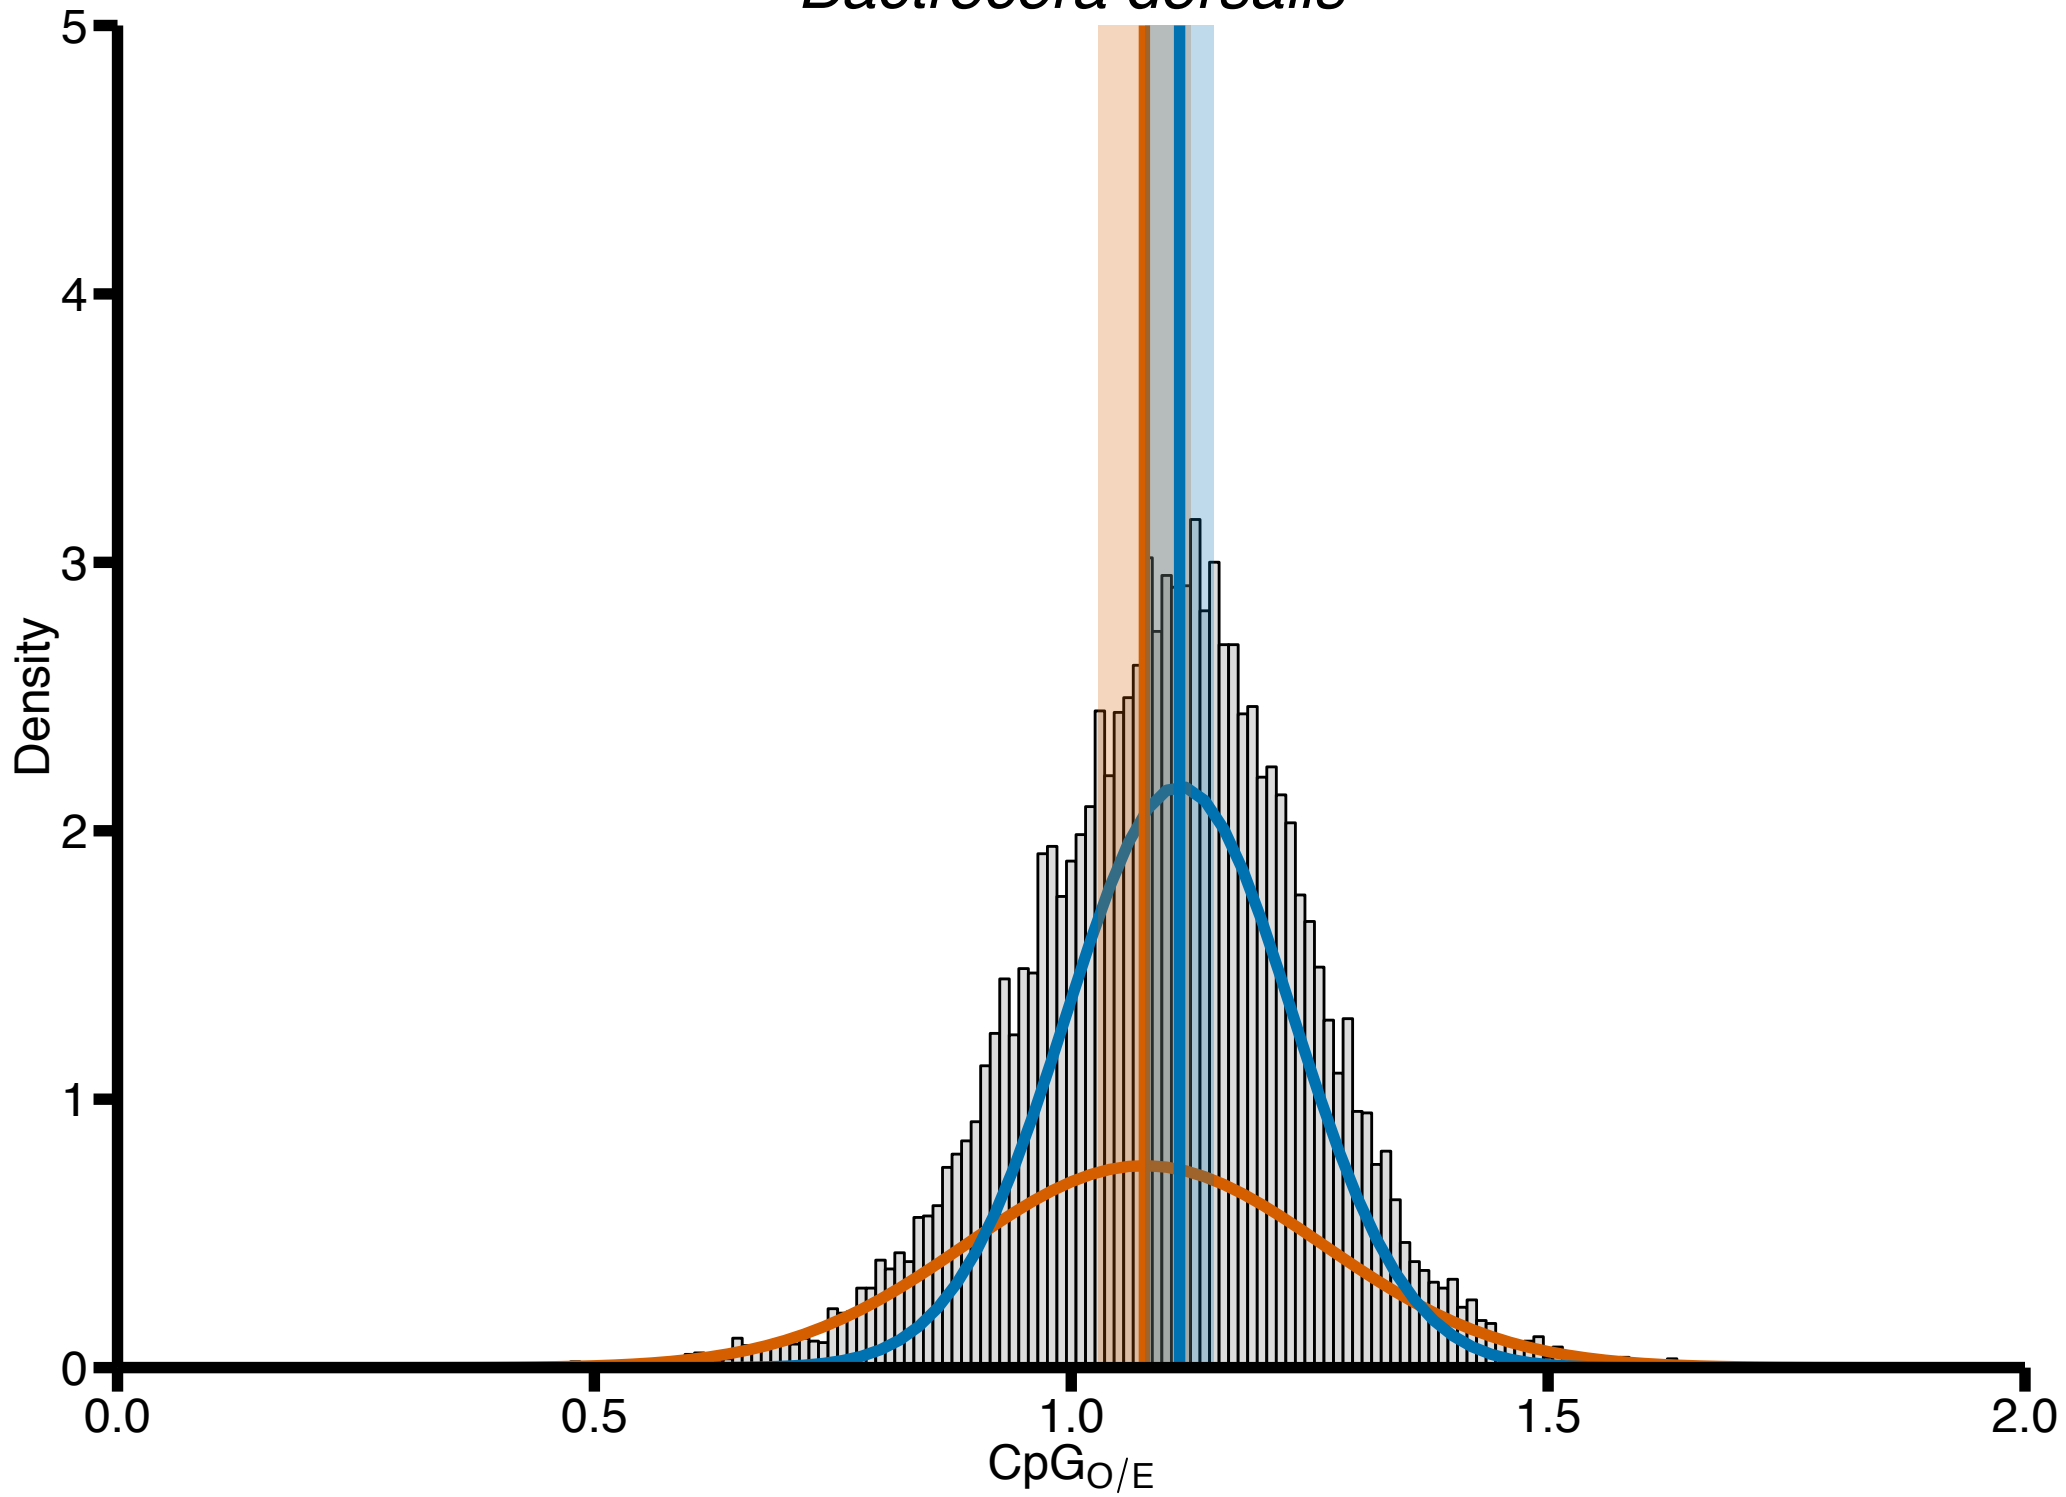



*Bactrocera oleae*

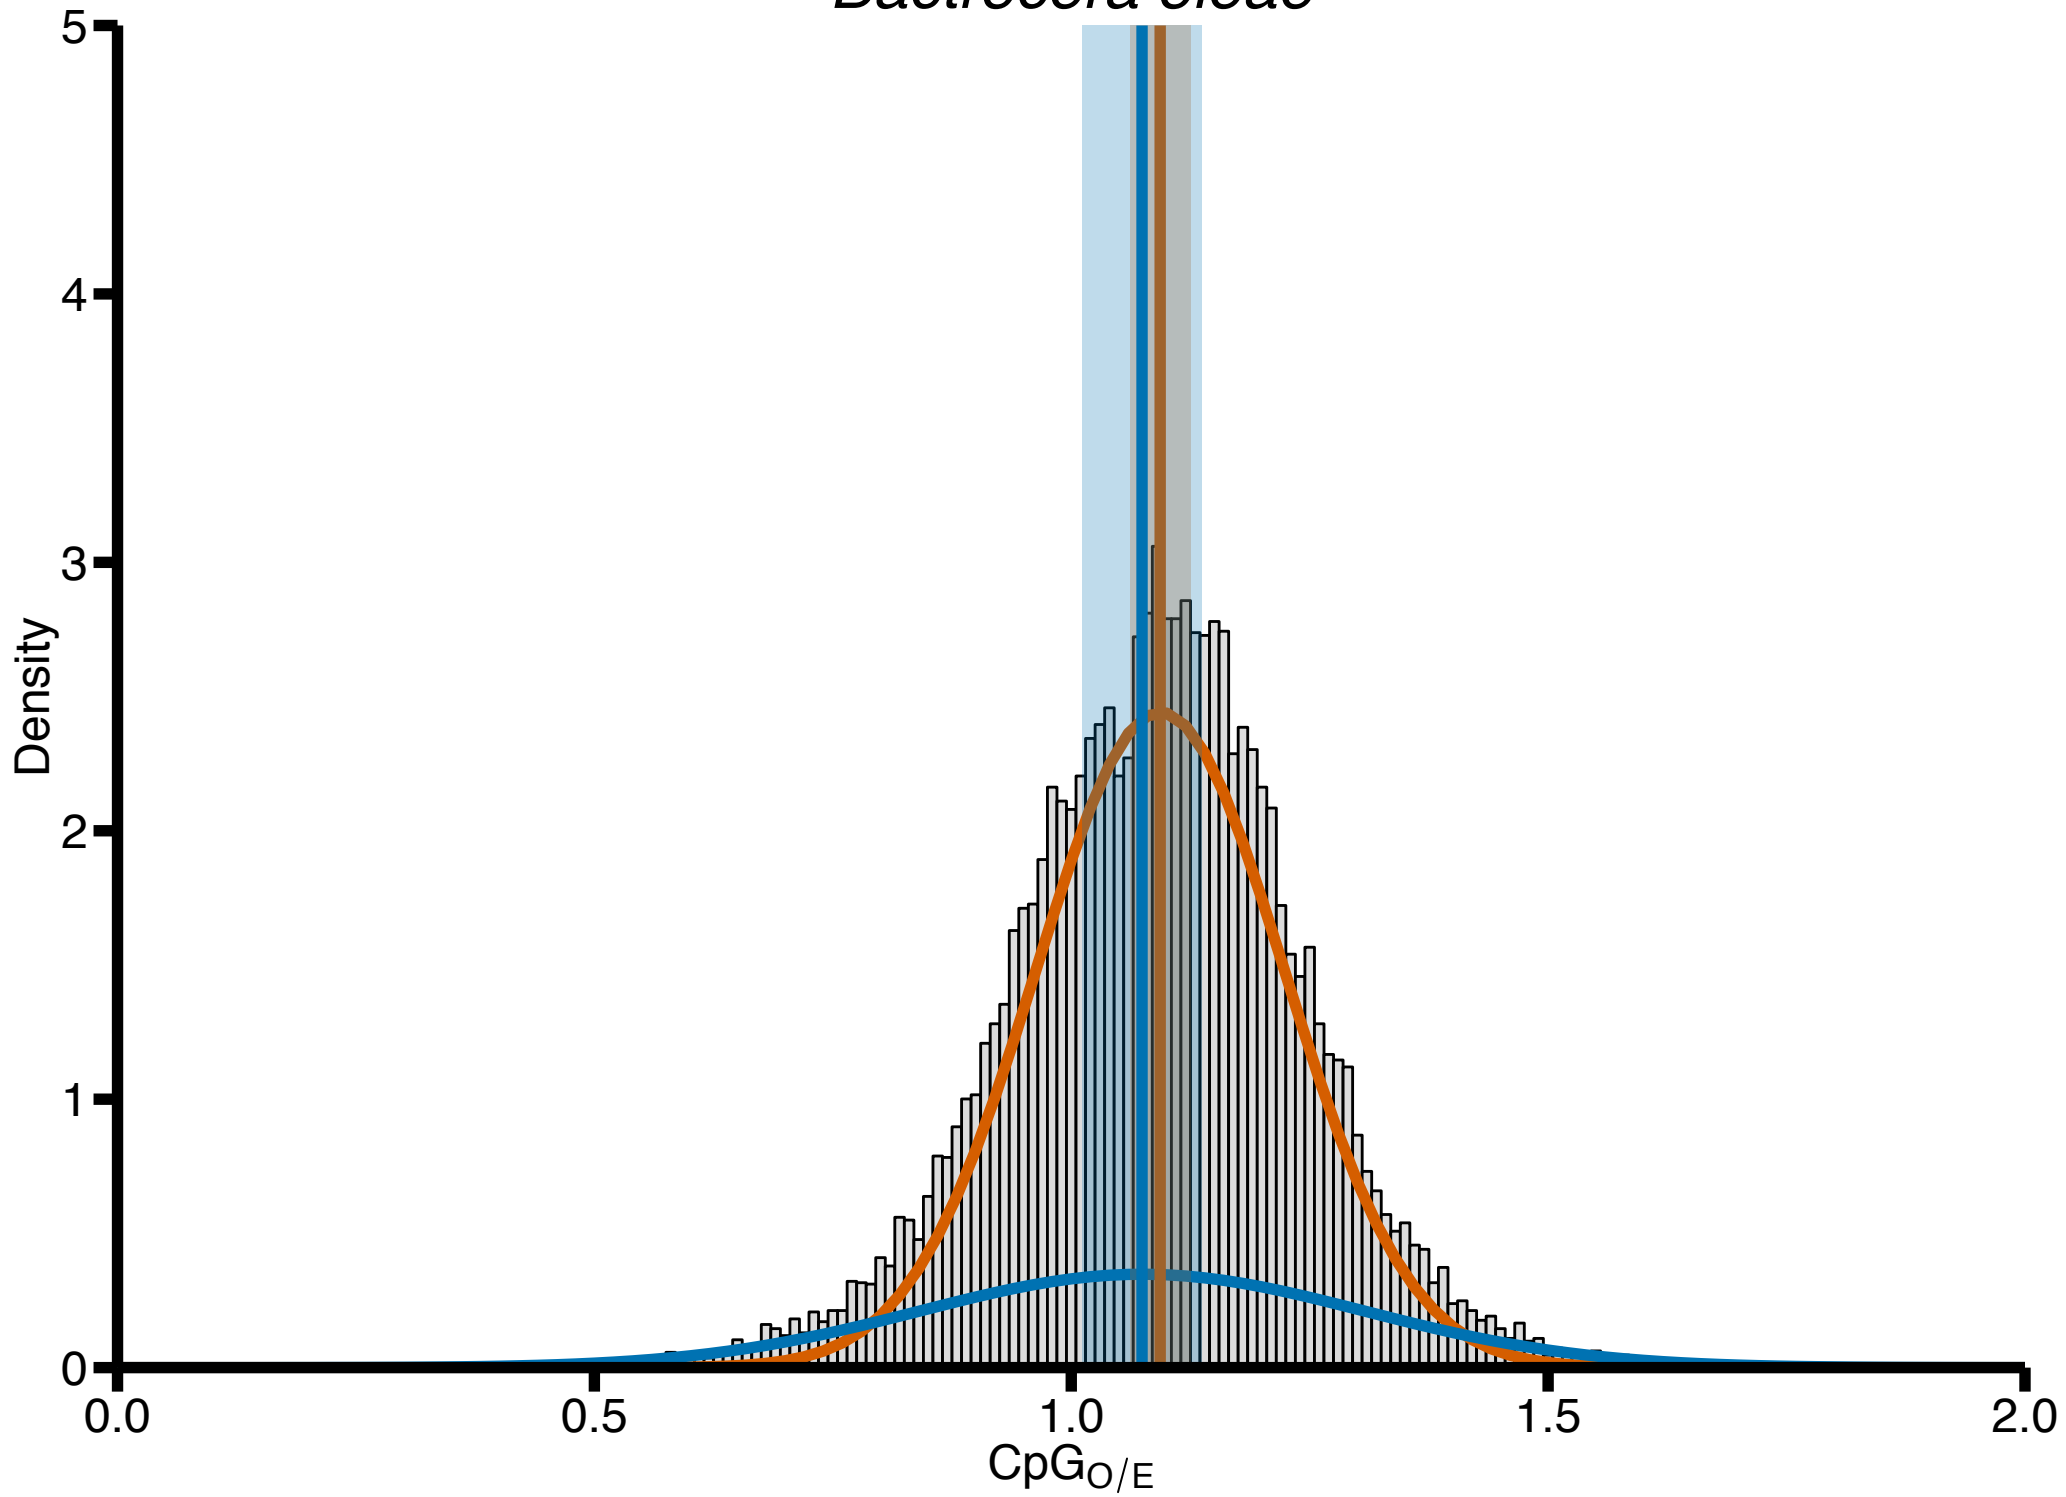

*Ceratitis capitata*

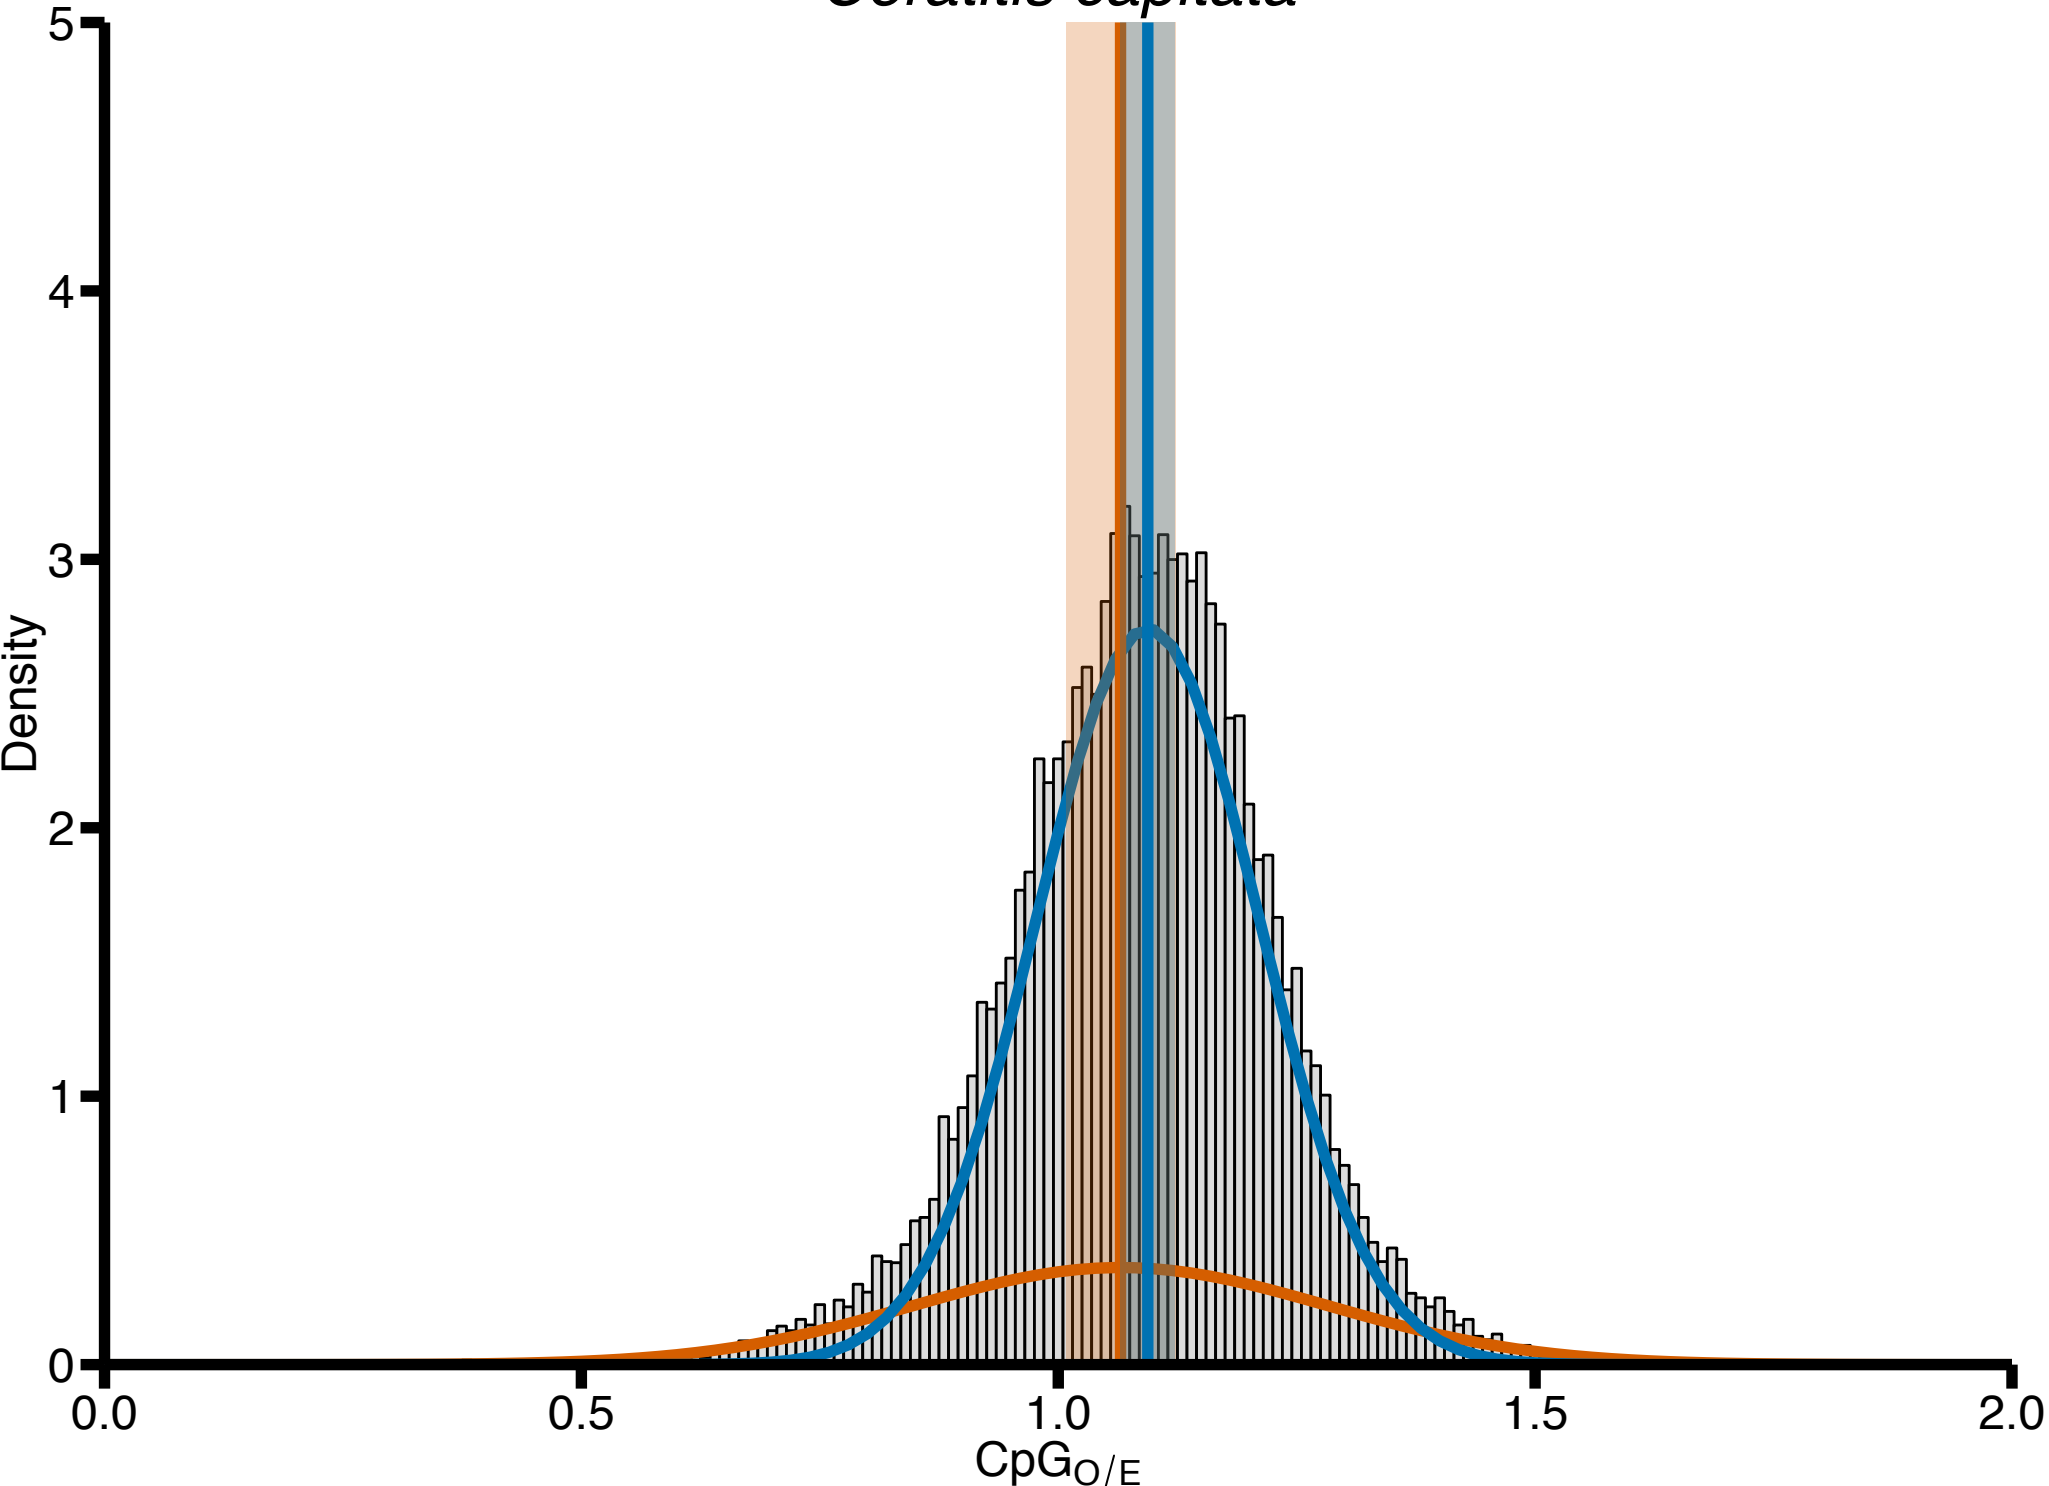

*Culex quinquefasciatus*

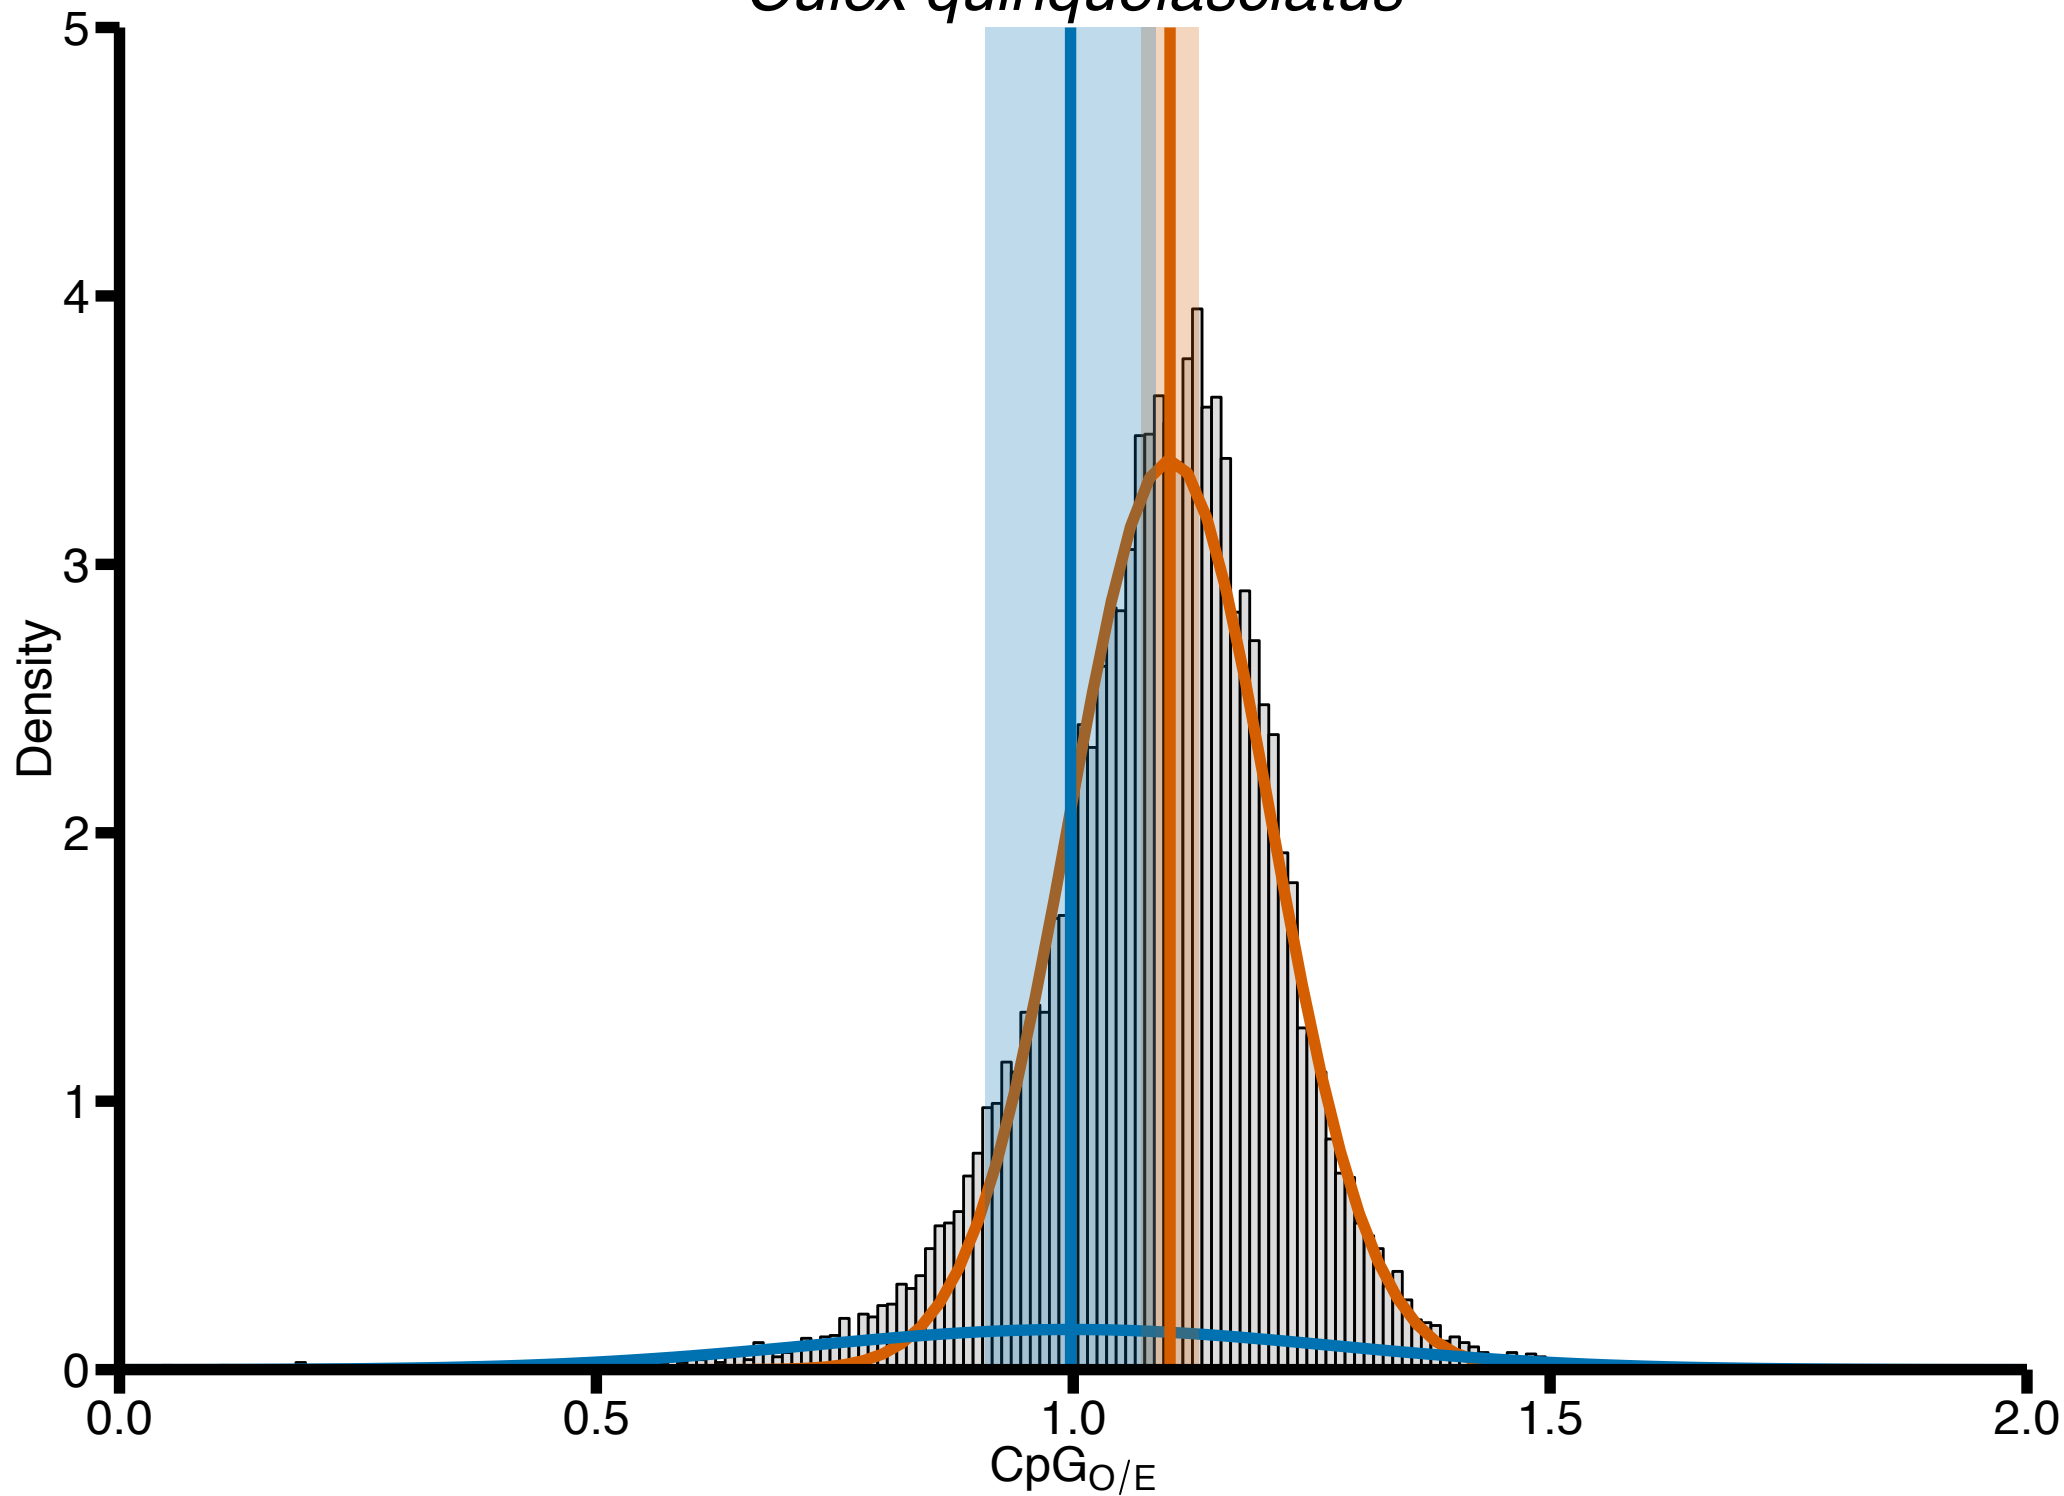

*Drosophila ananassae*

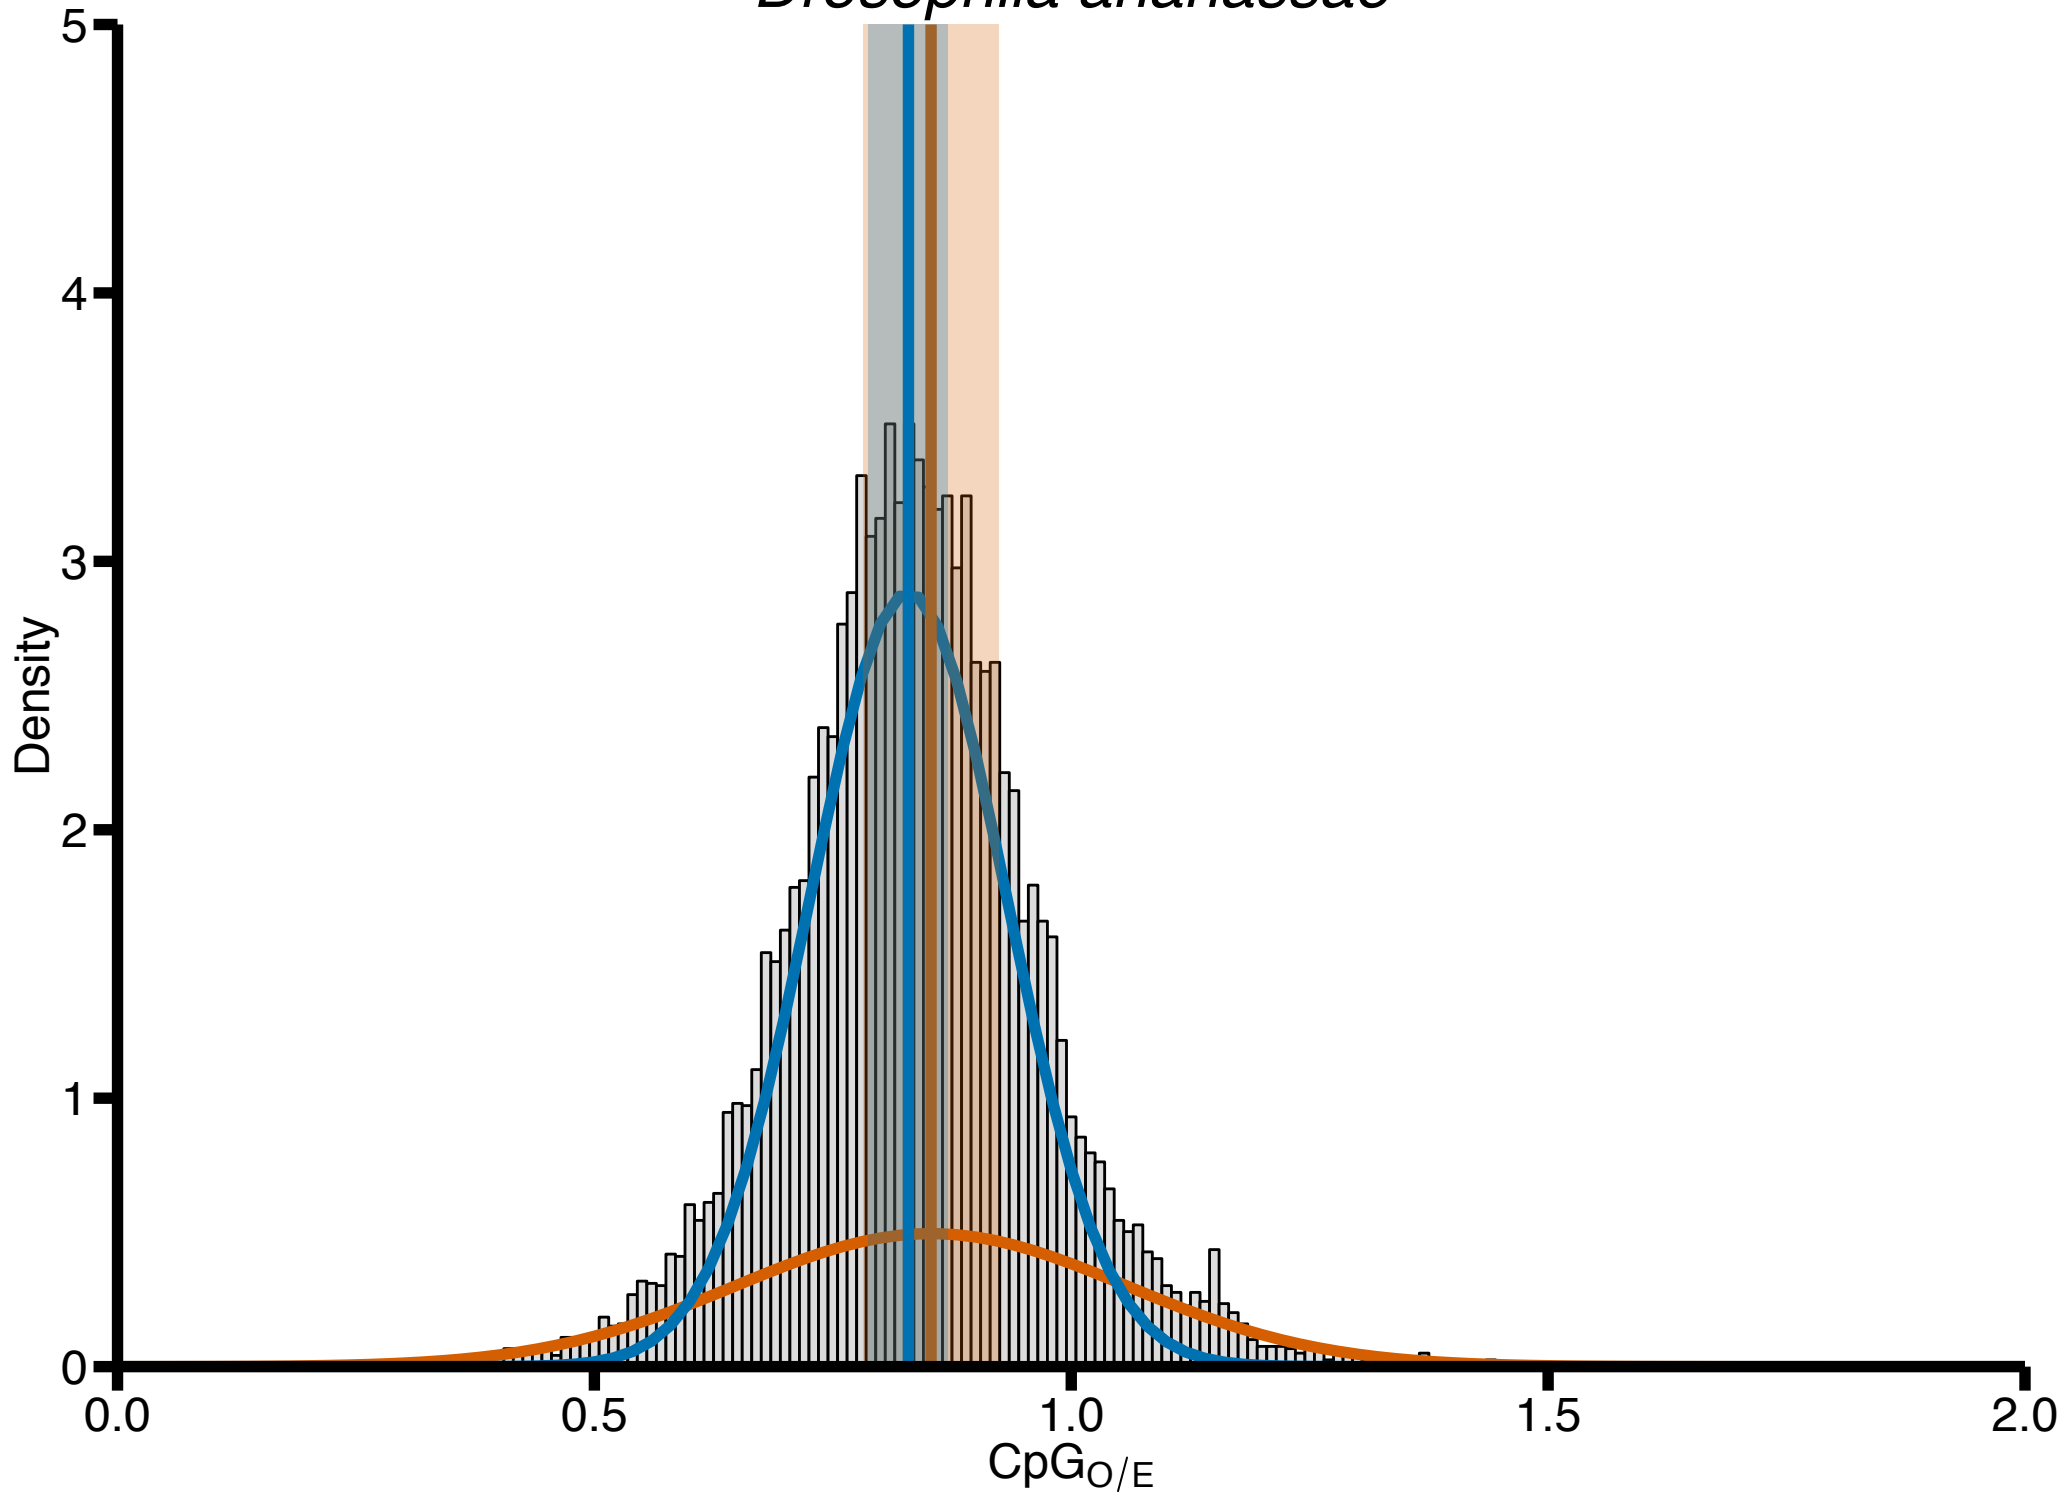

*Drosophila biarmipes*

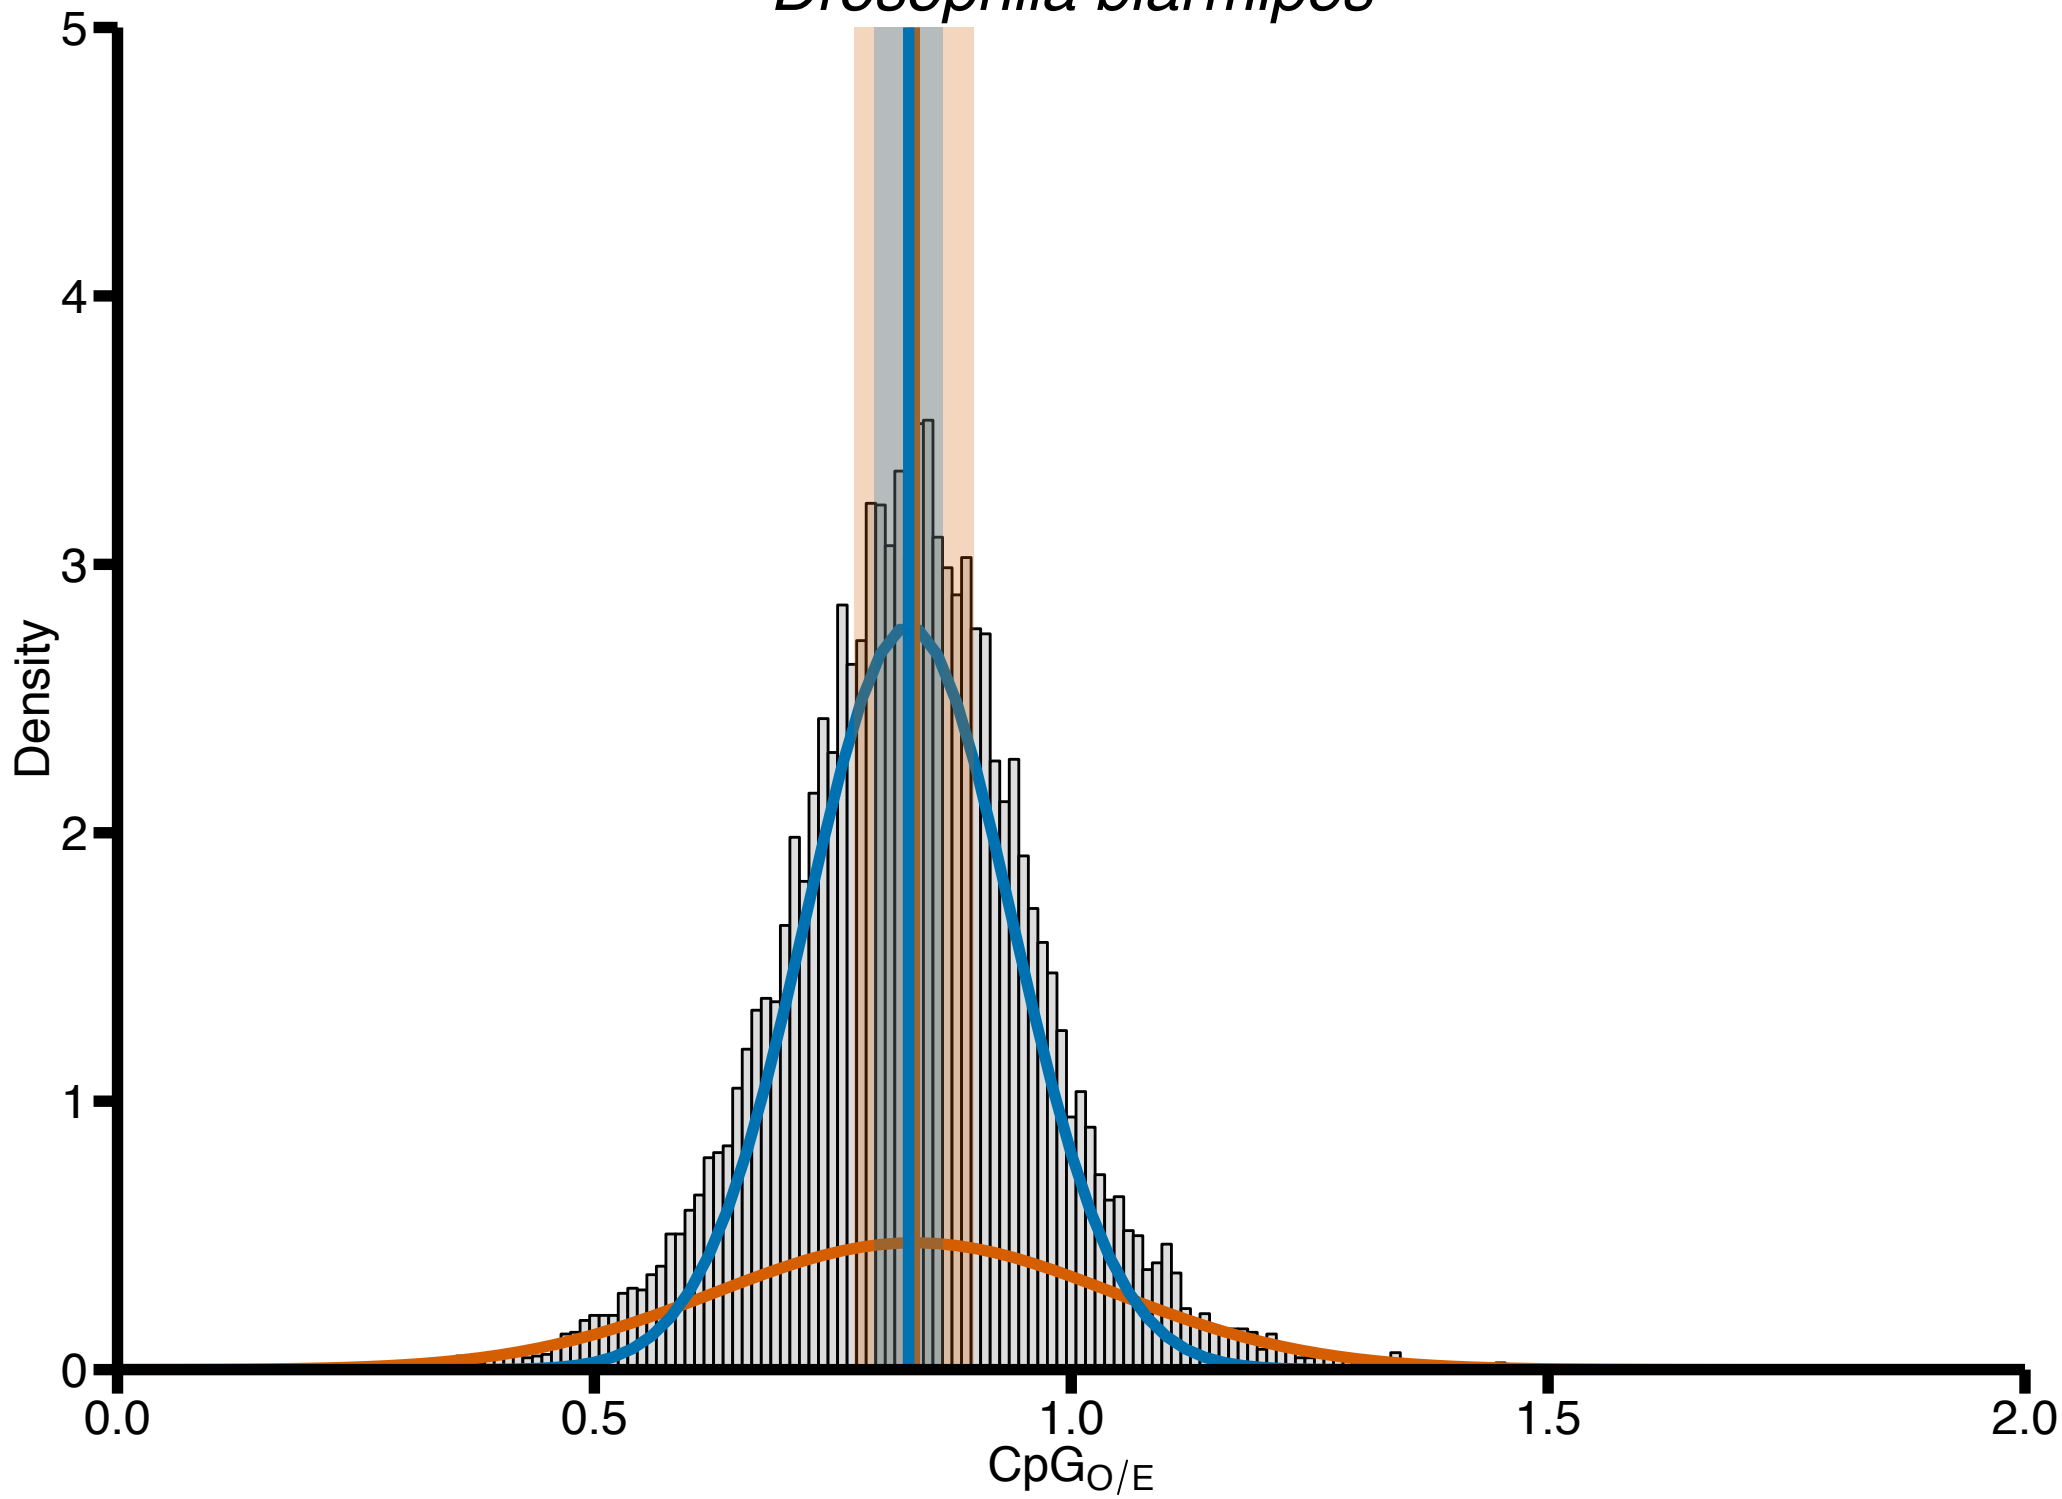

*Drosophila bipectinata*

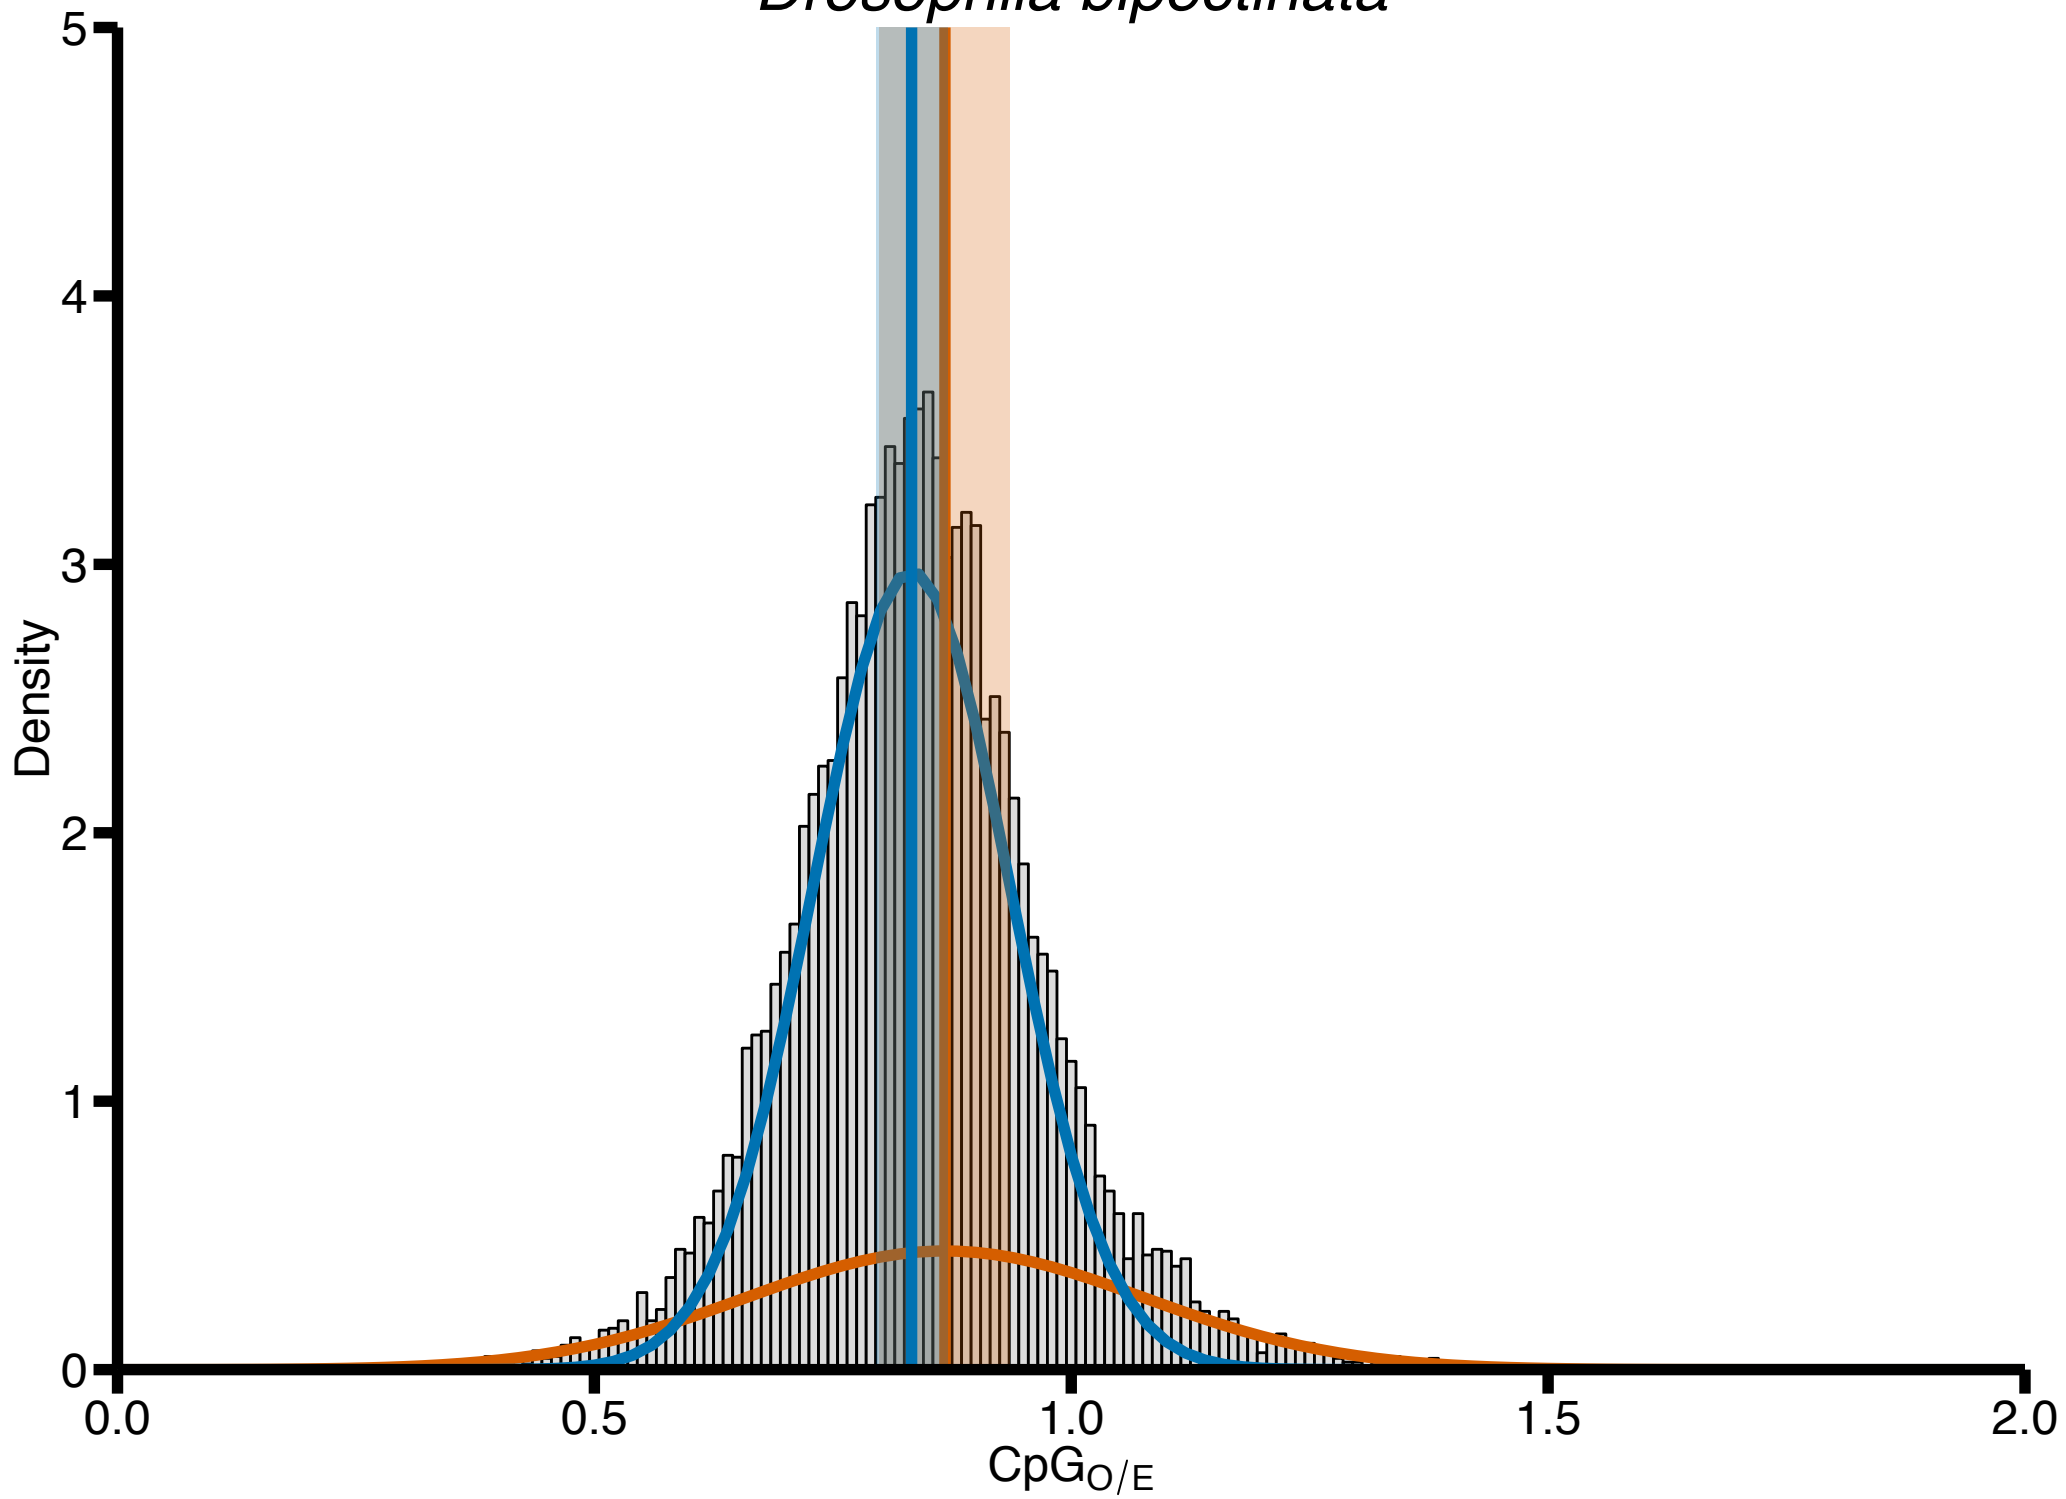

*Drosophila elegans*

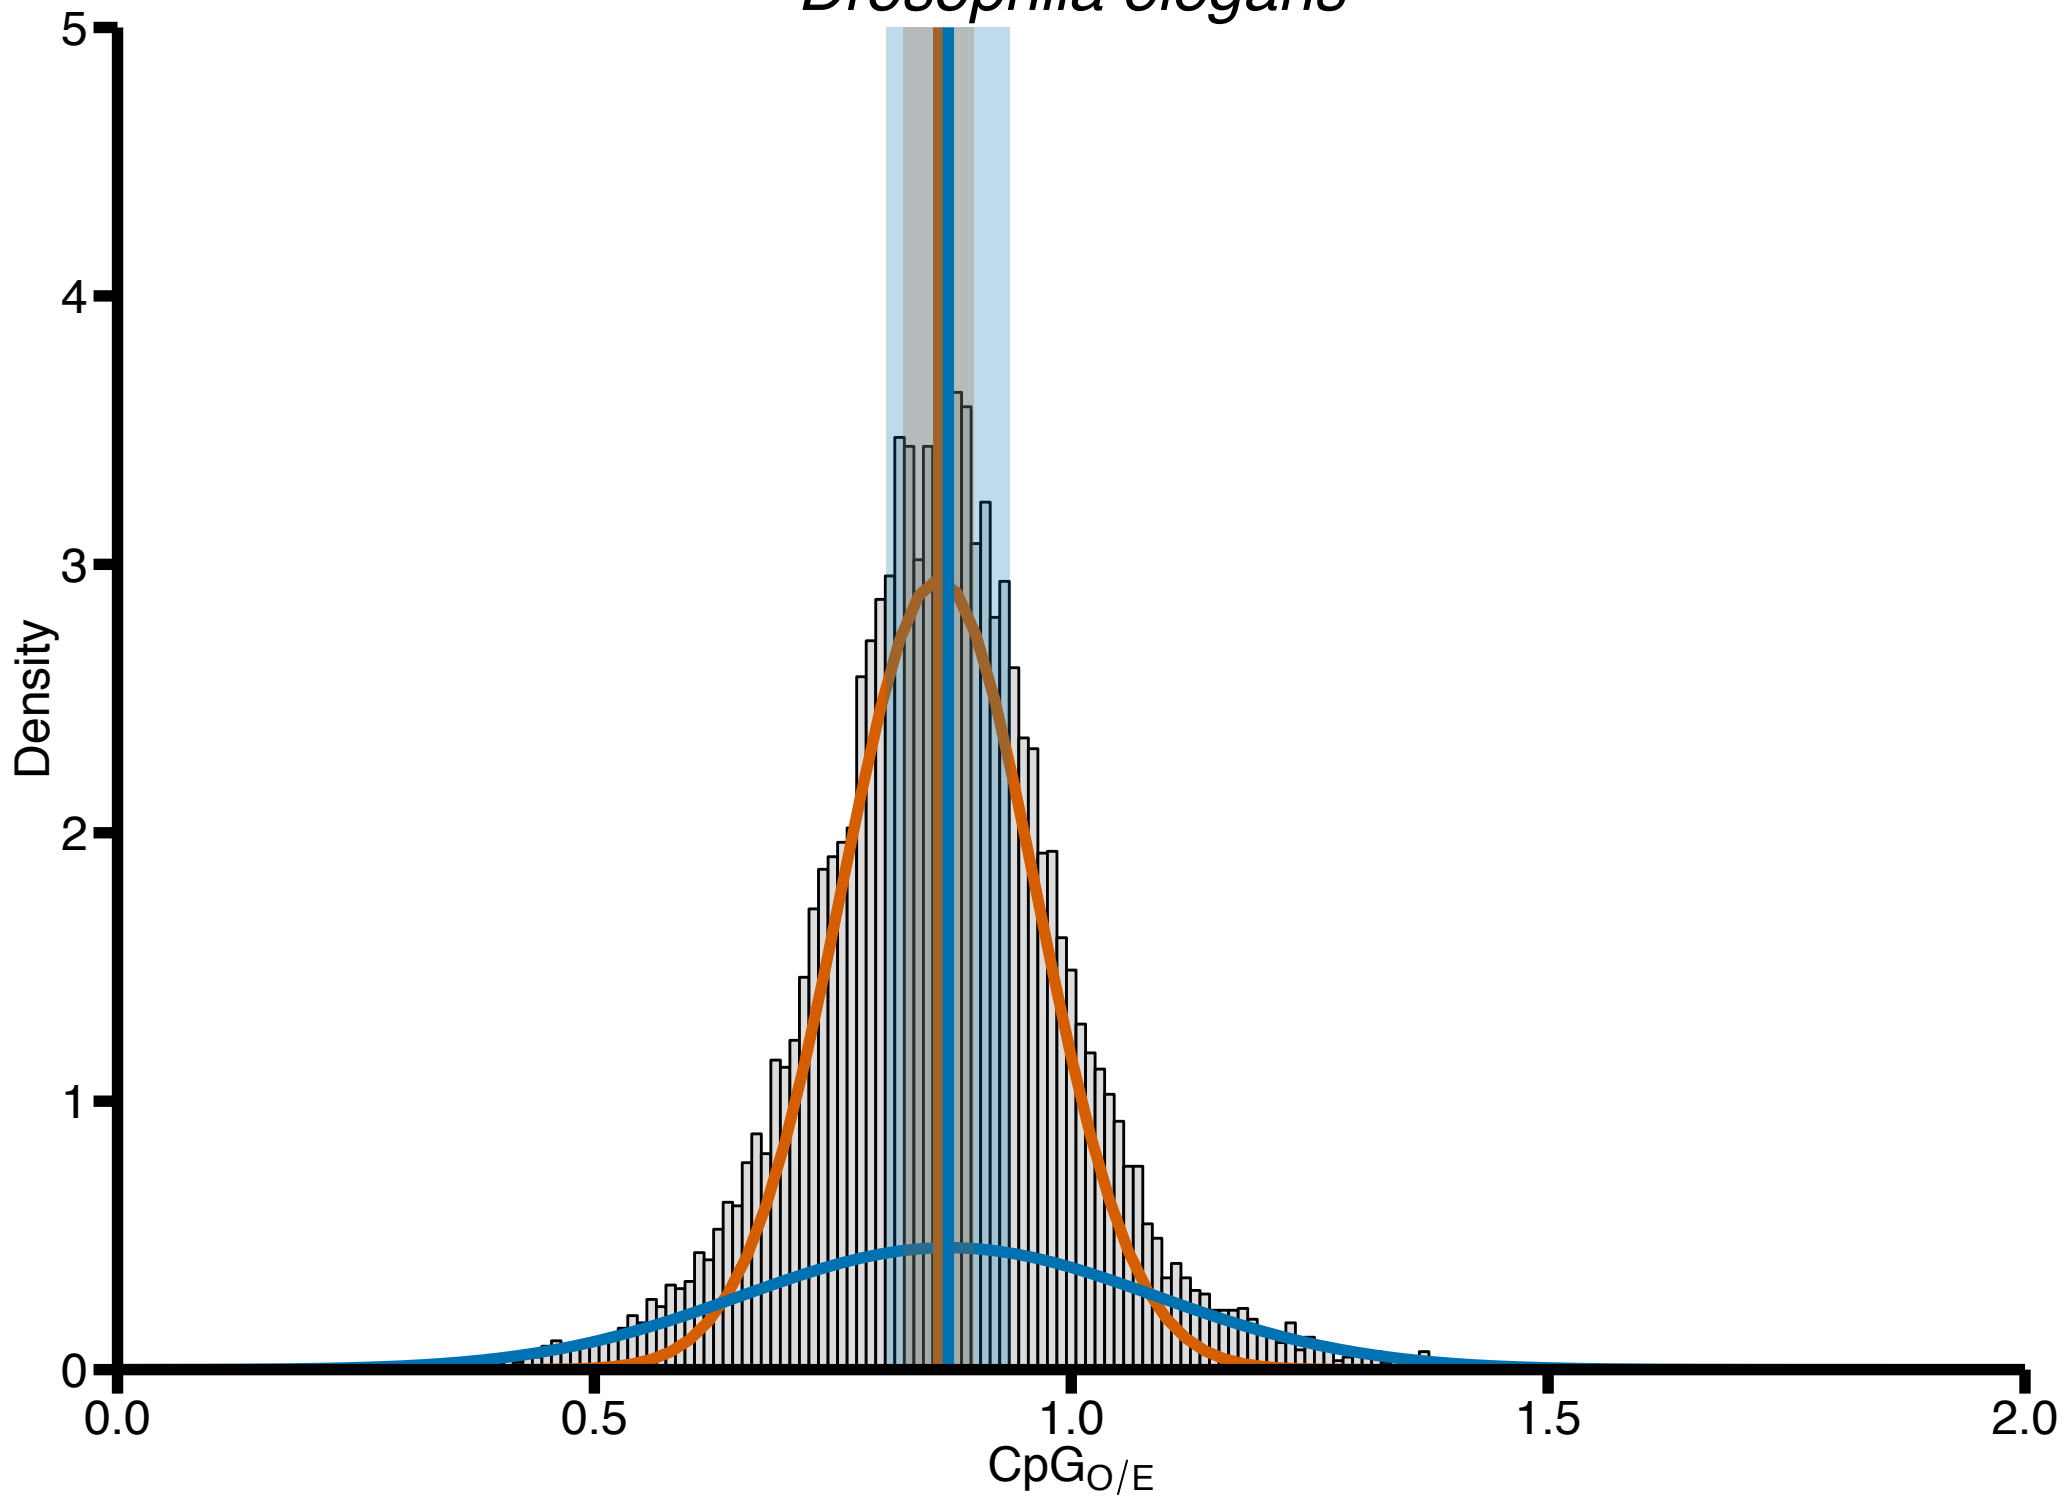

*Drosophila erecta*

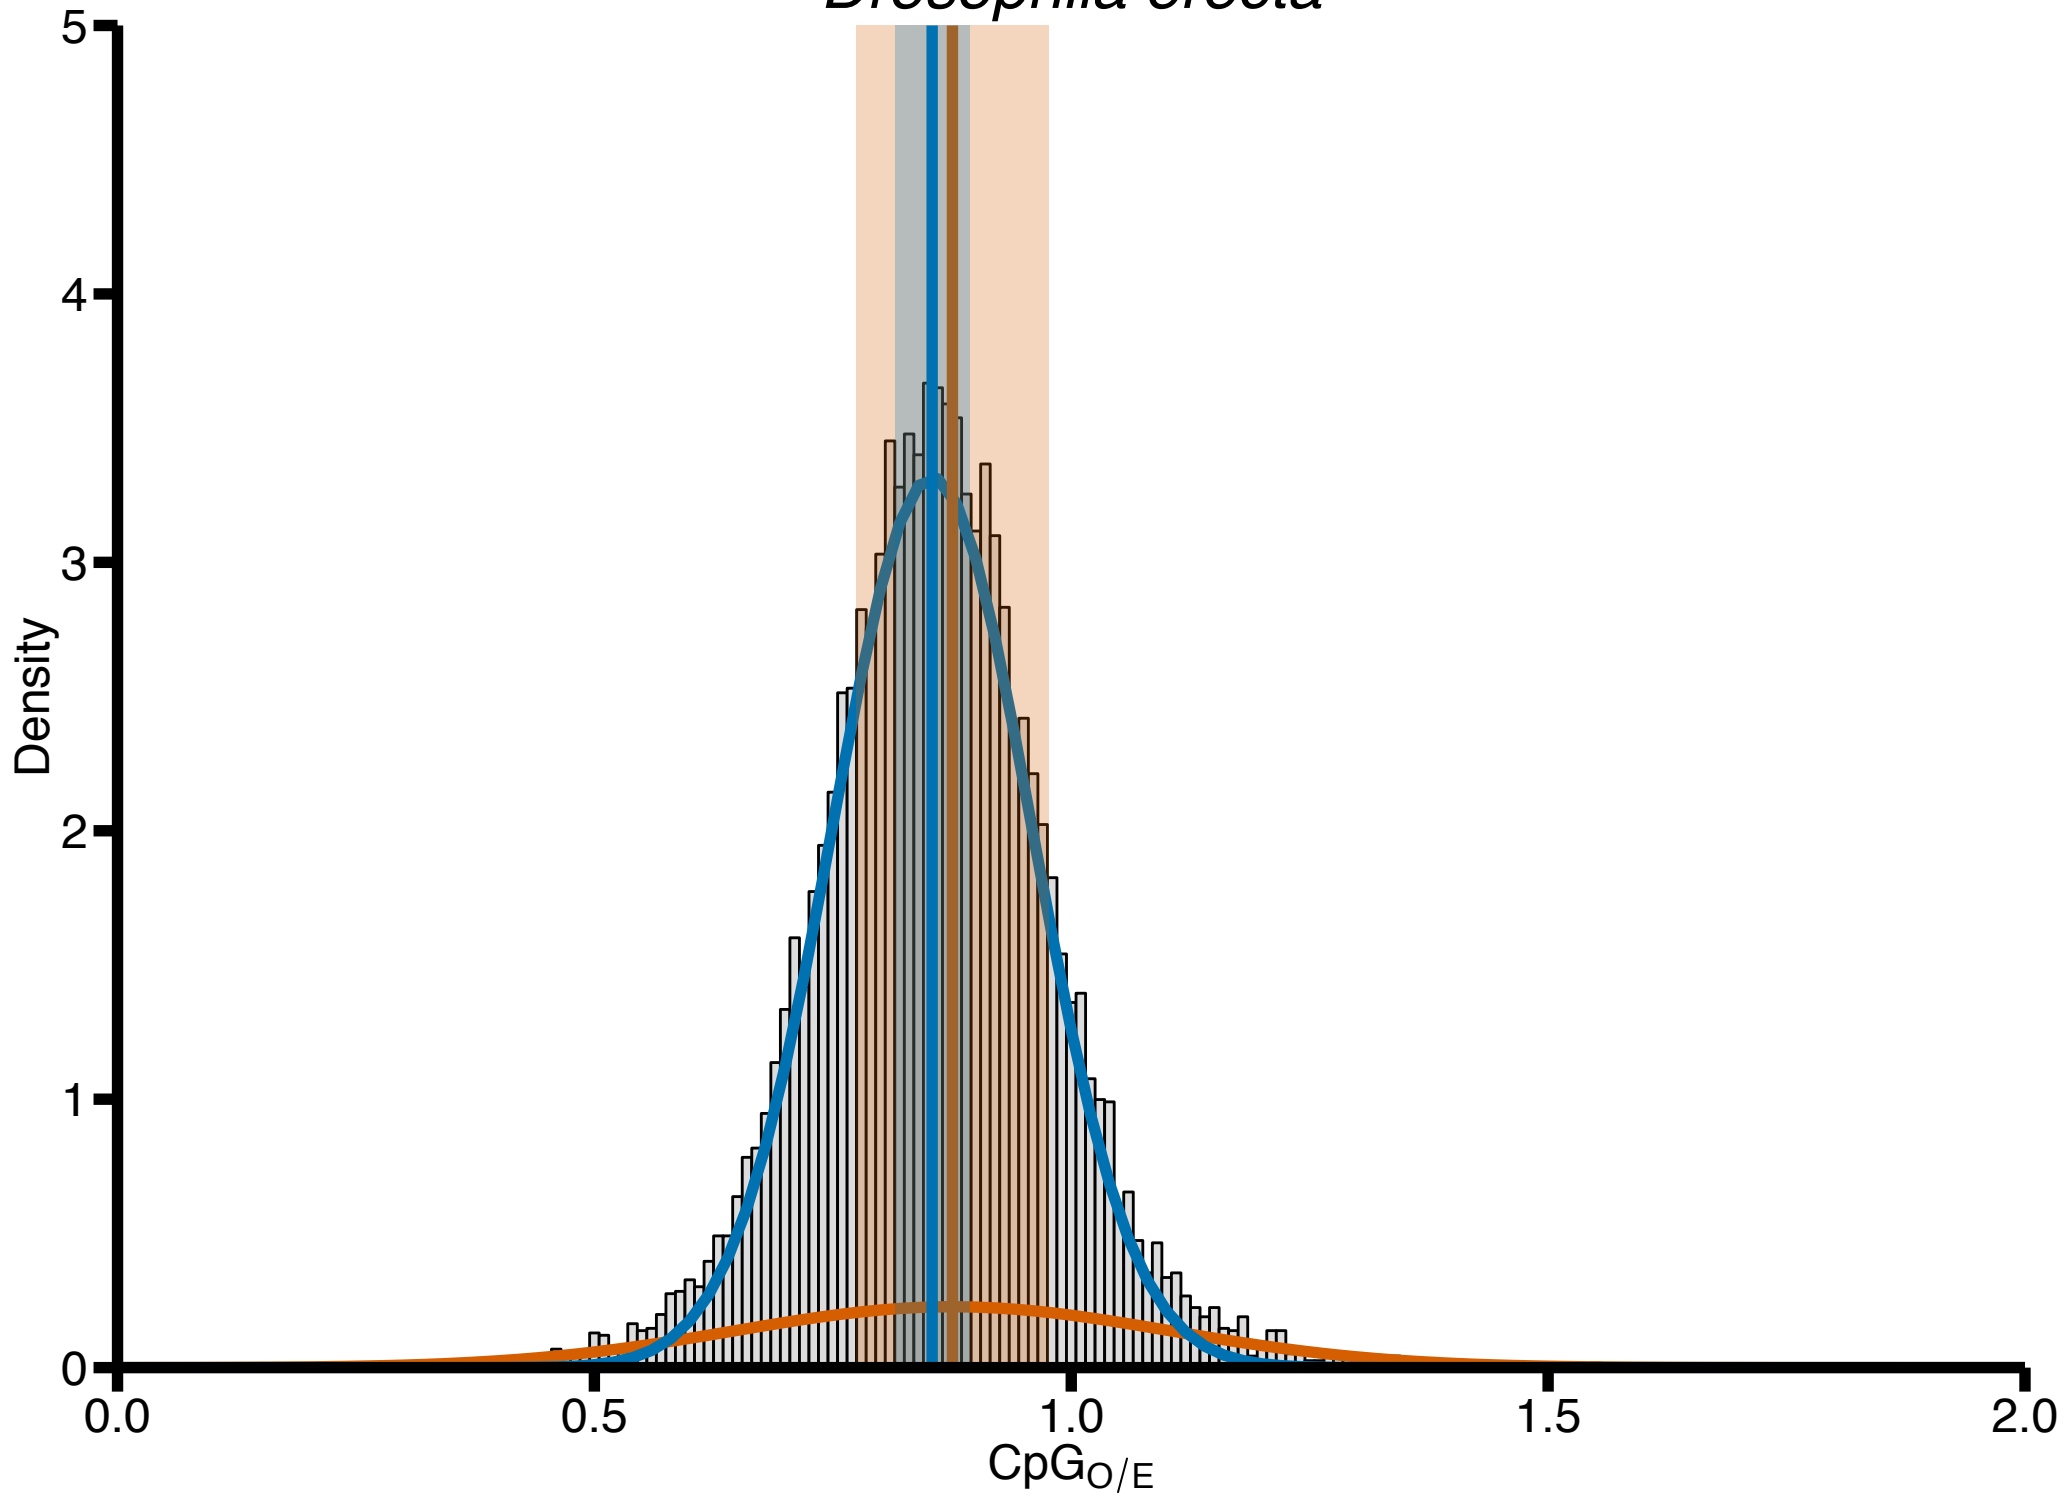



*Drosophila eugracilis*

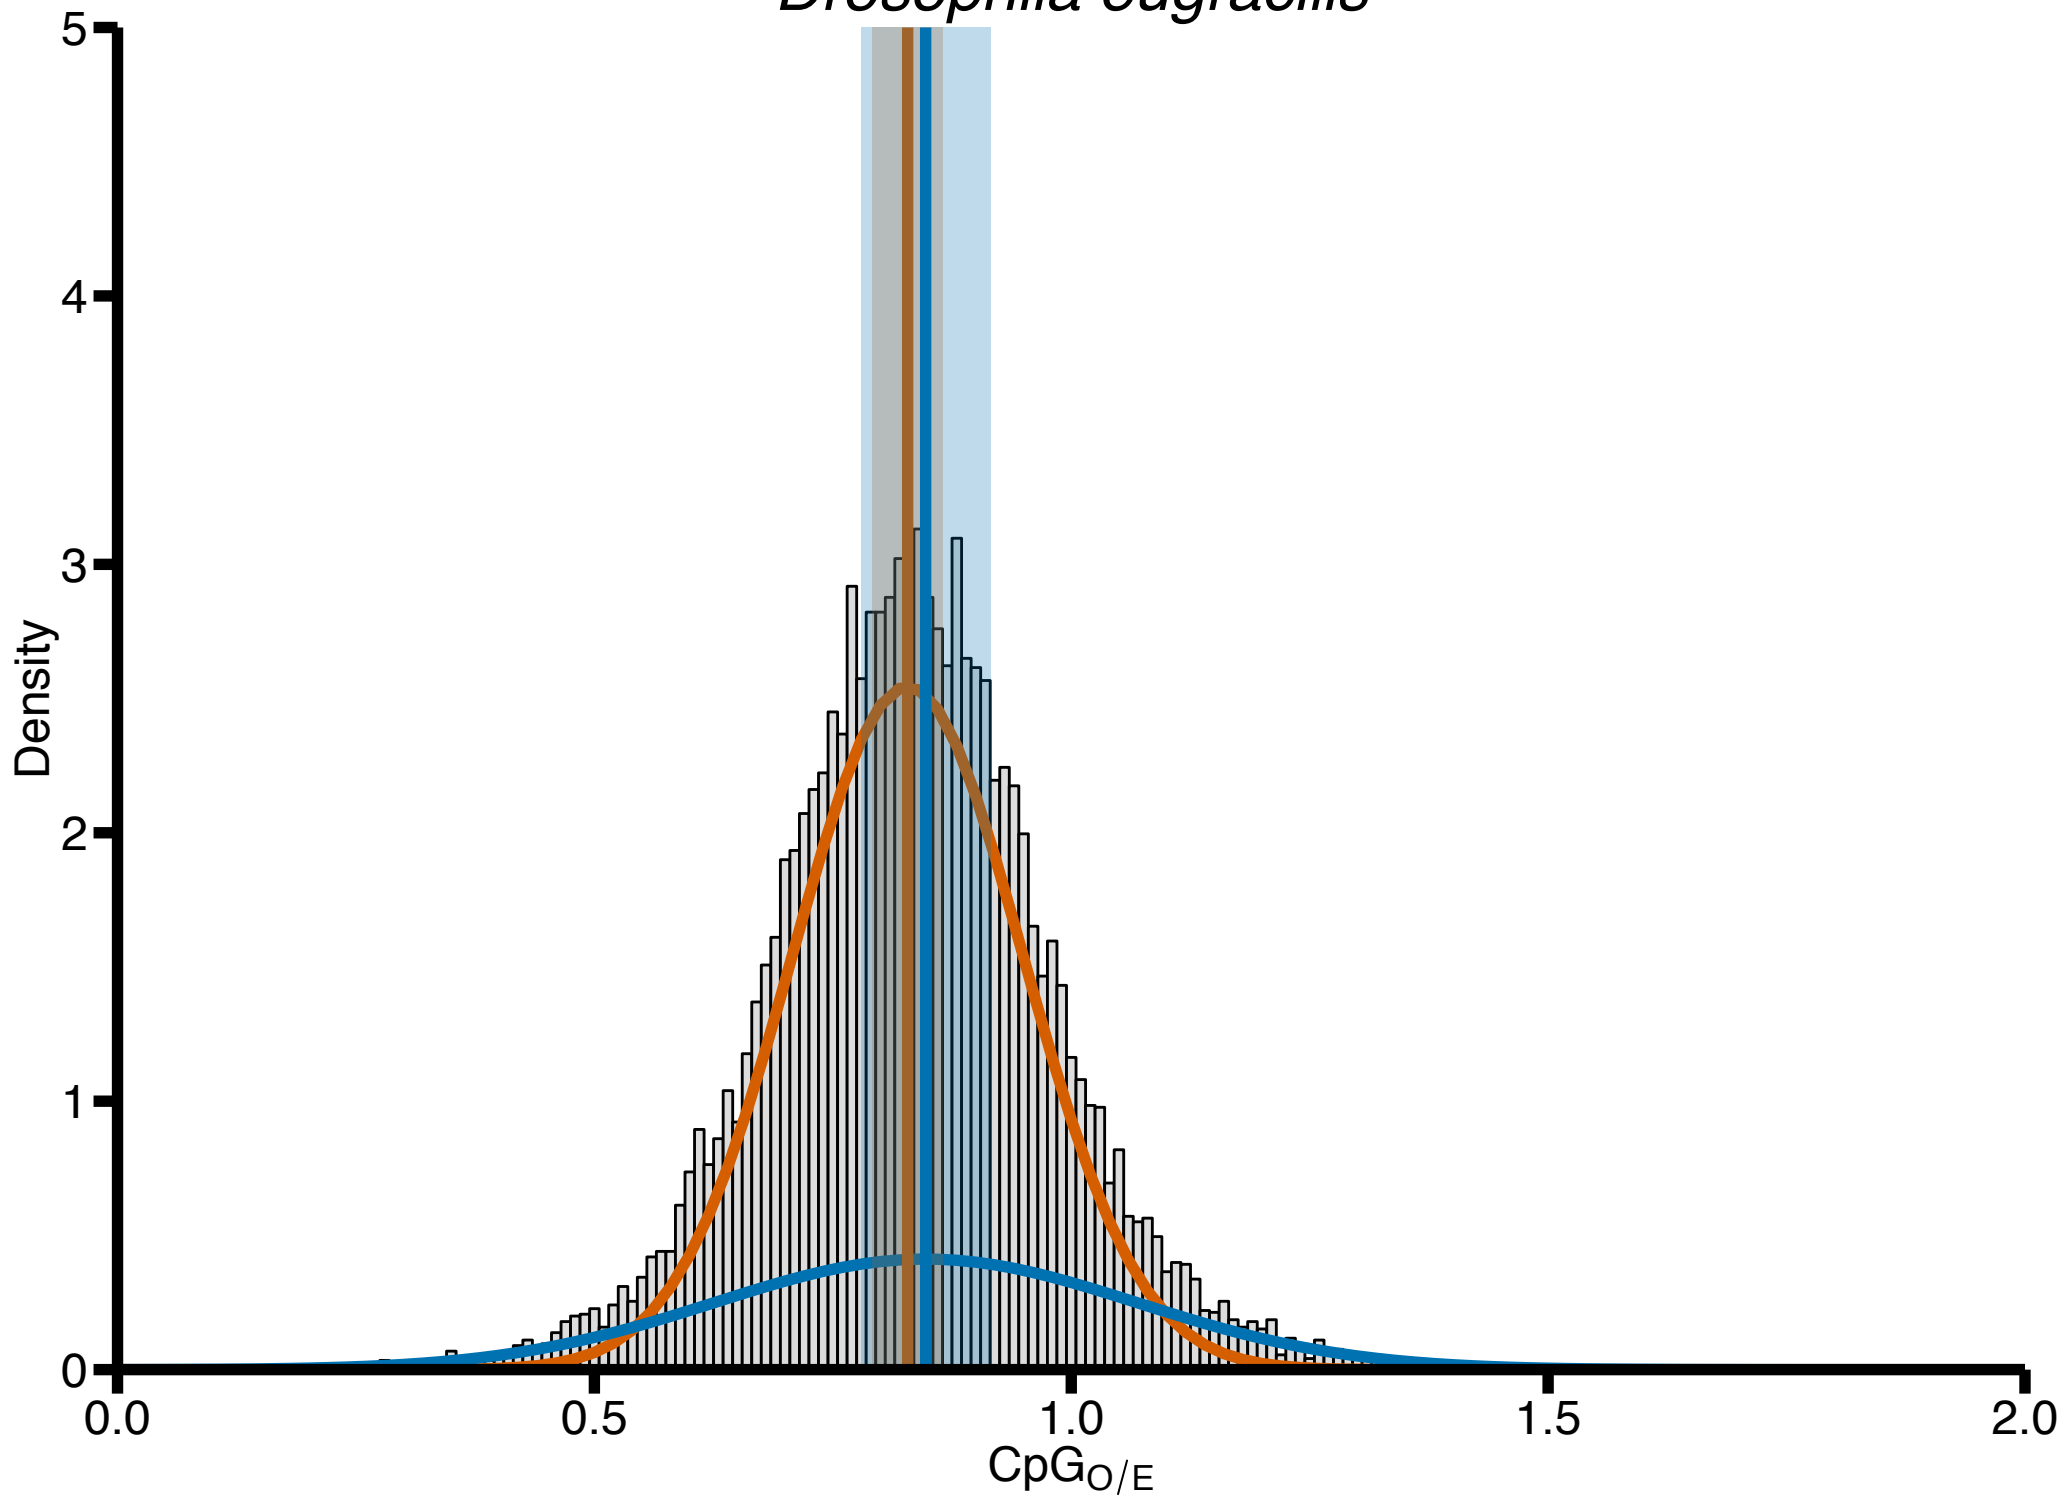

*Drosophila ficusphila*

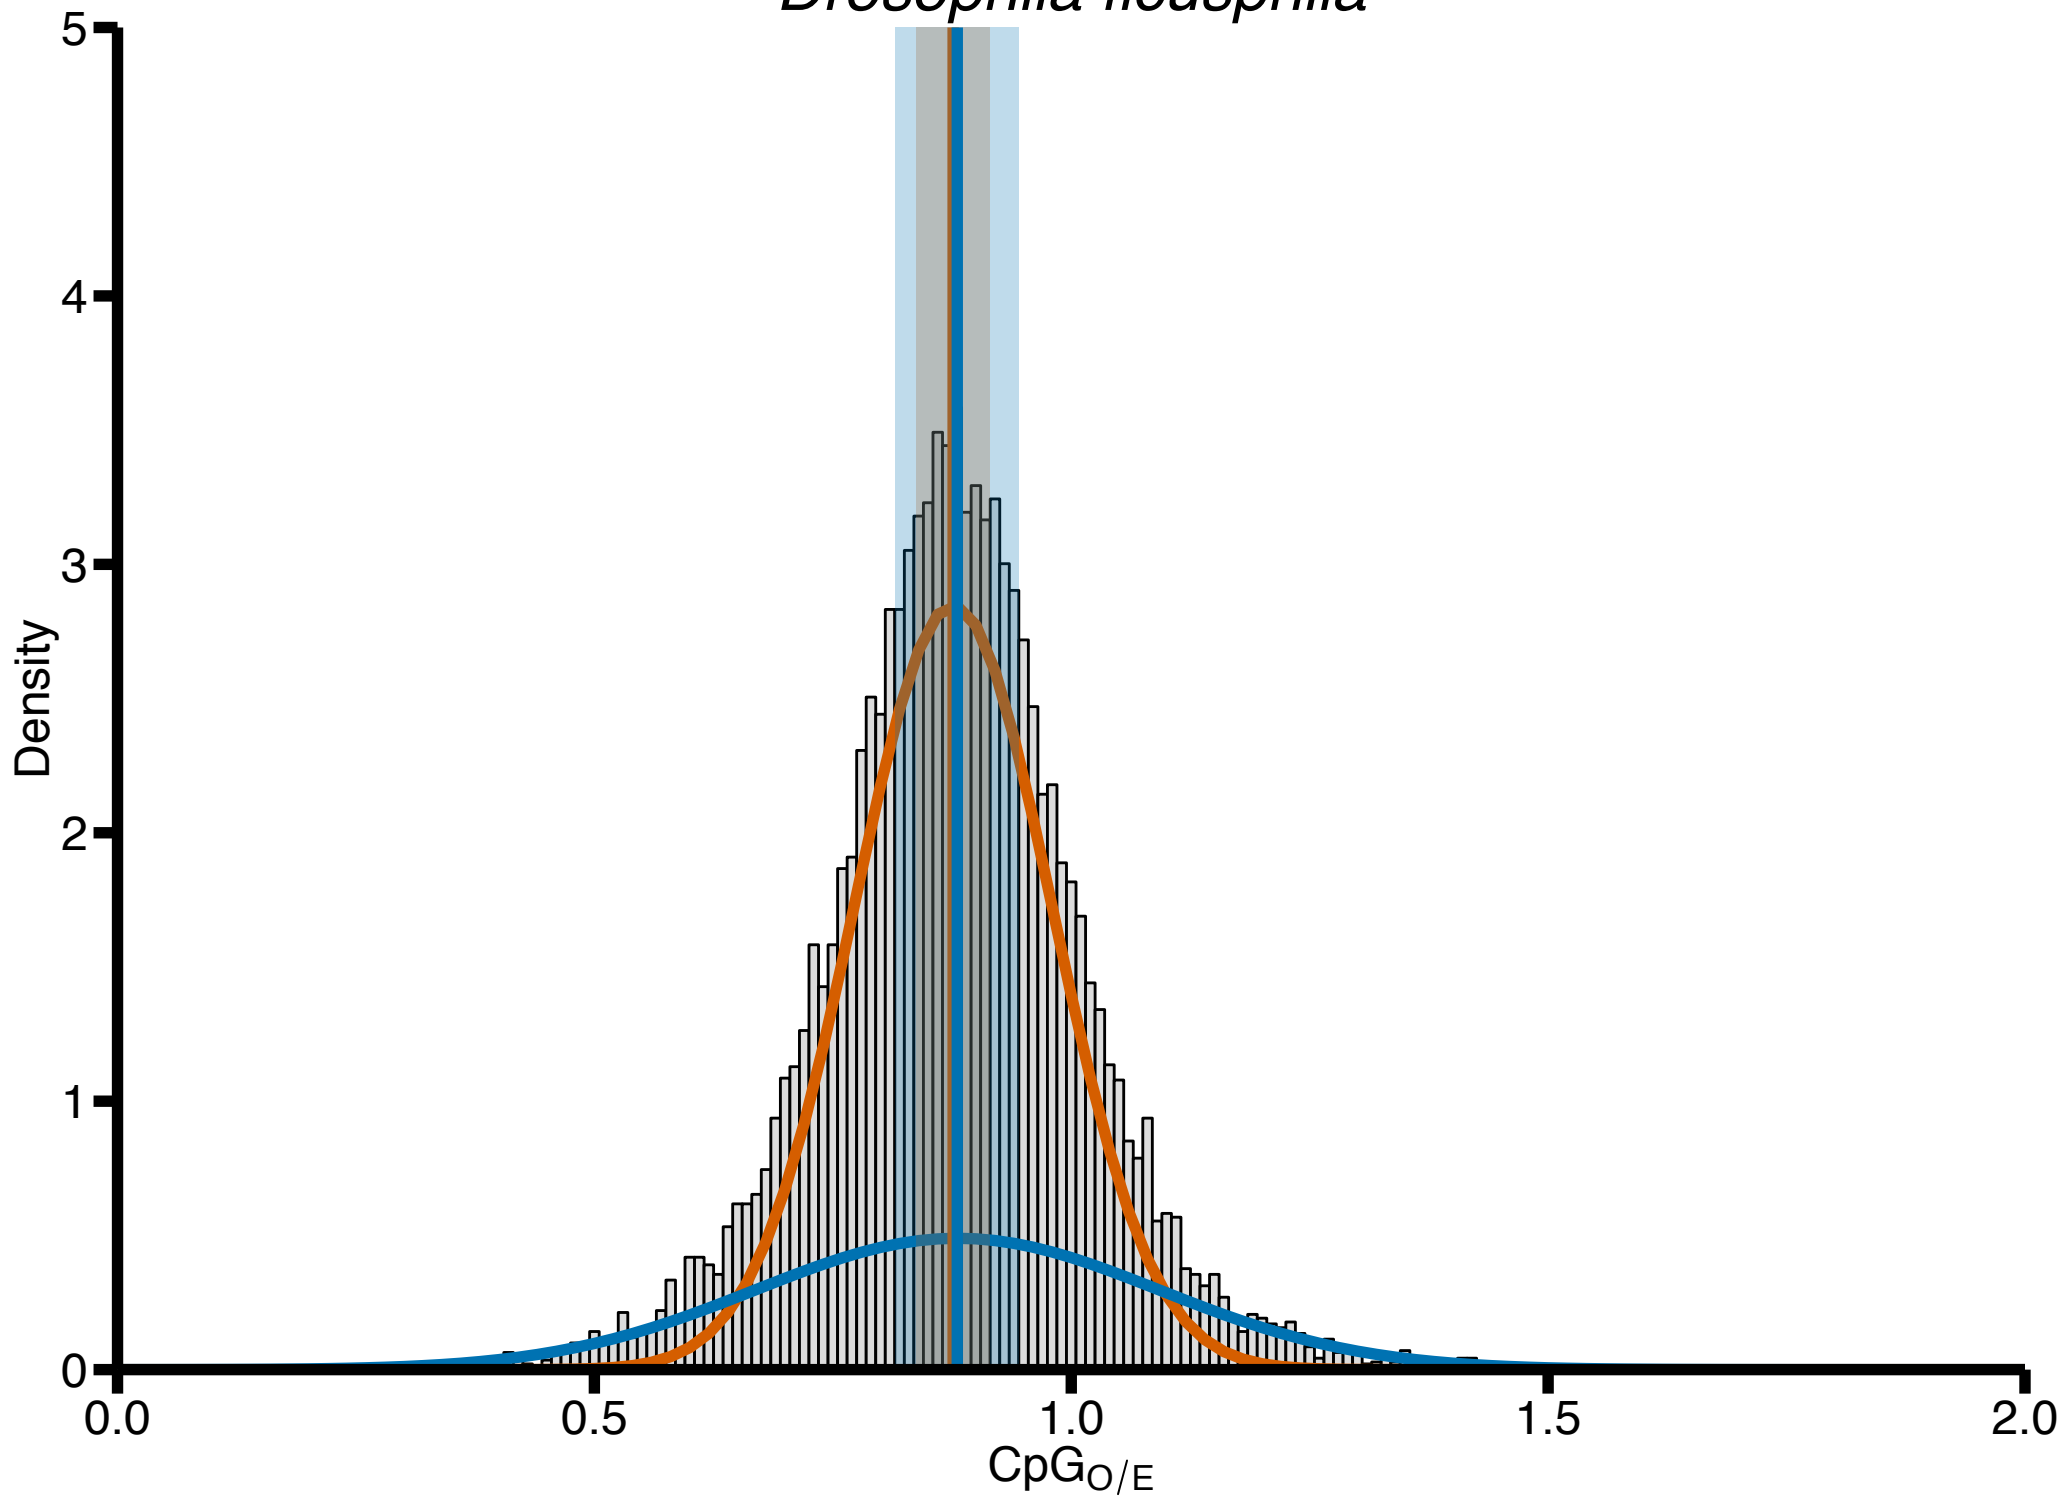

*Drosophila grimshawi*

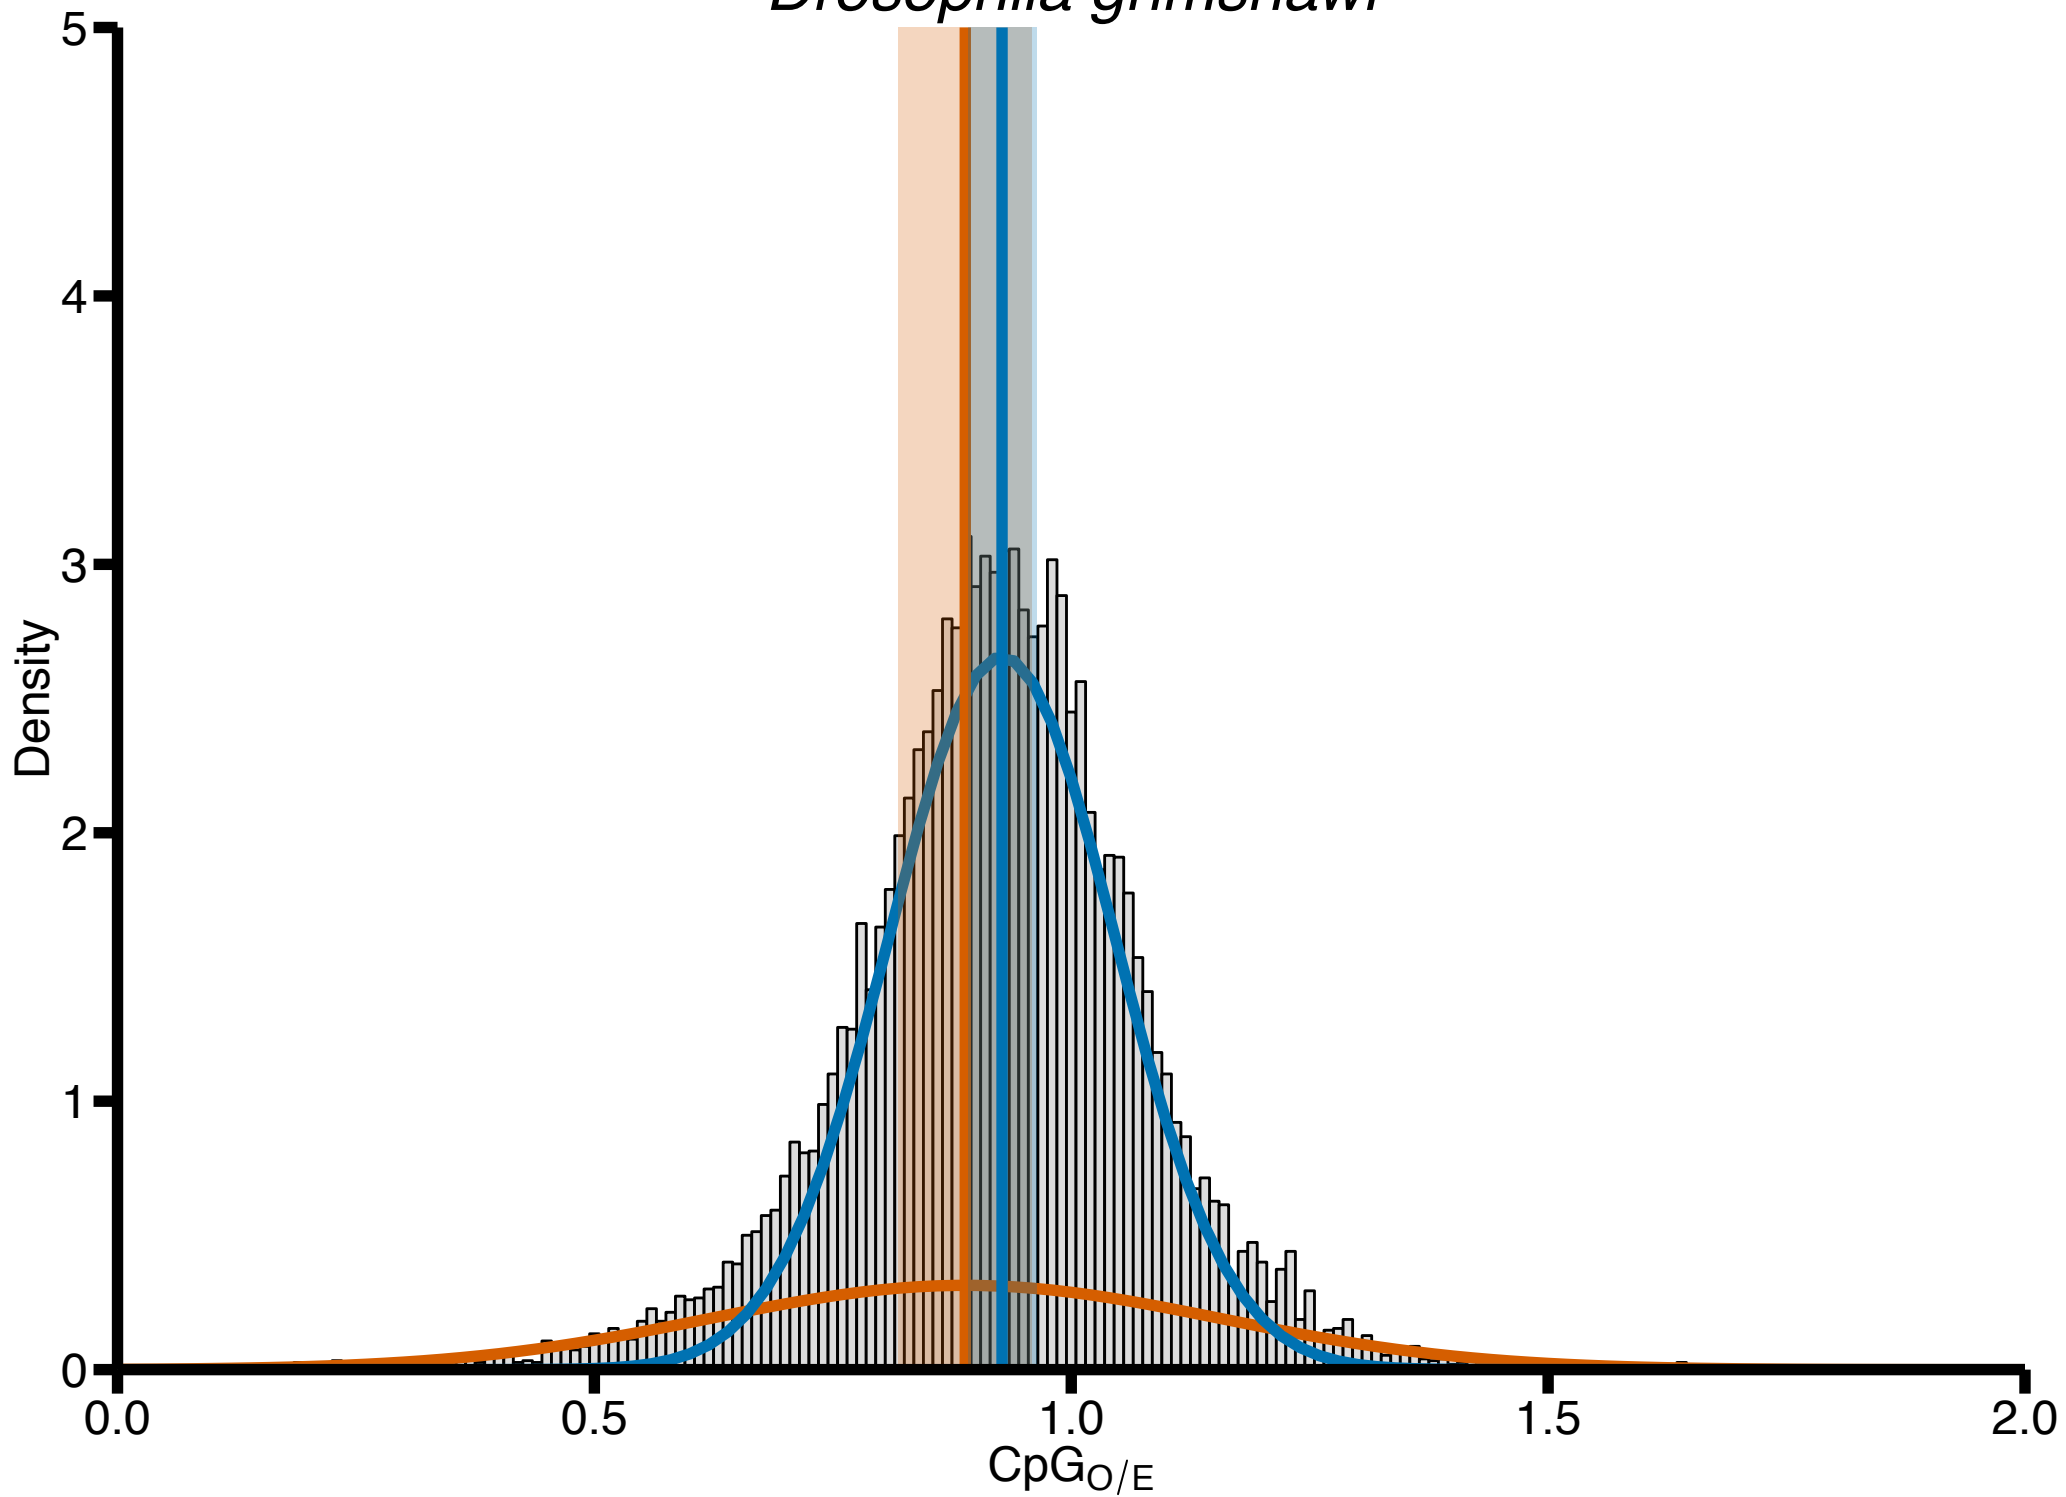

*Drosophila kikkawai*

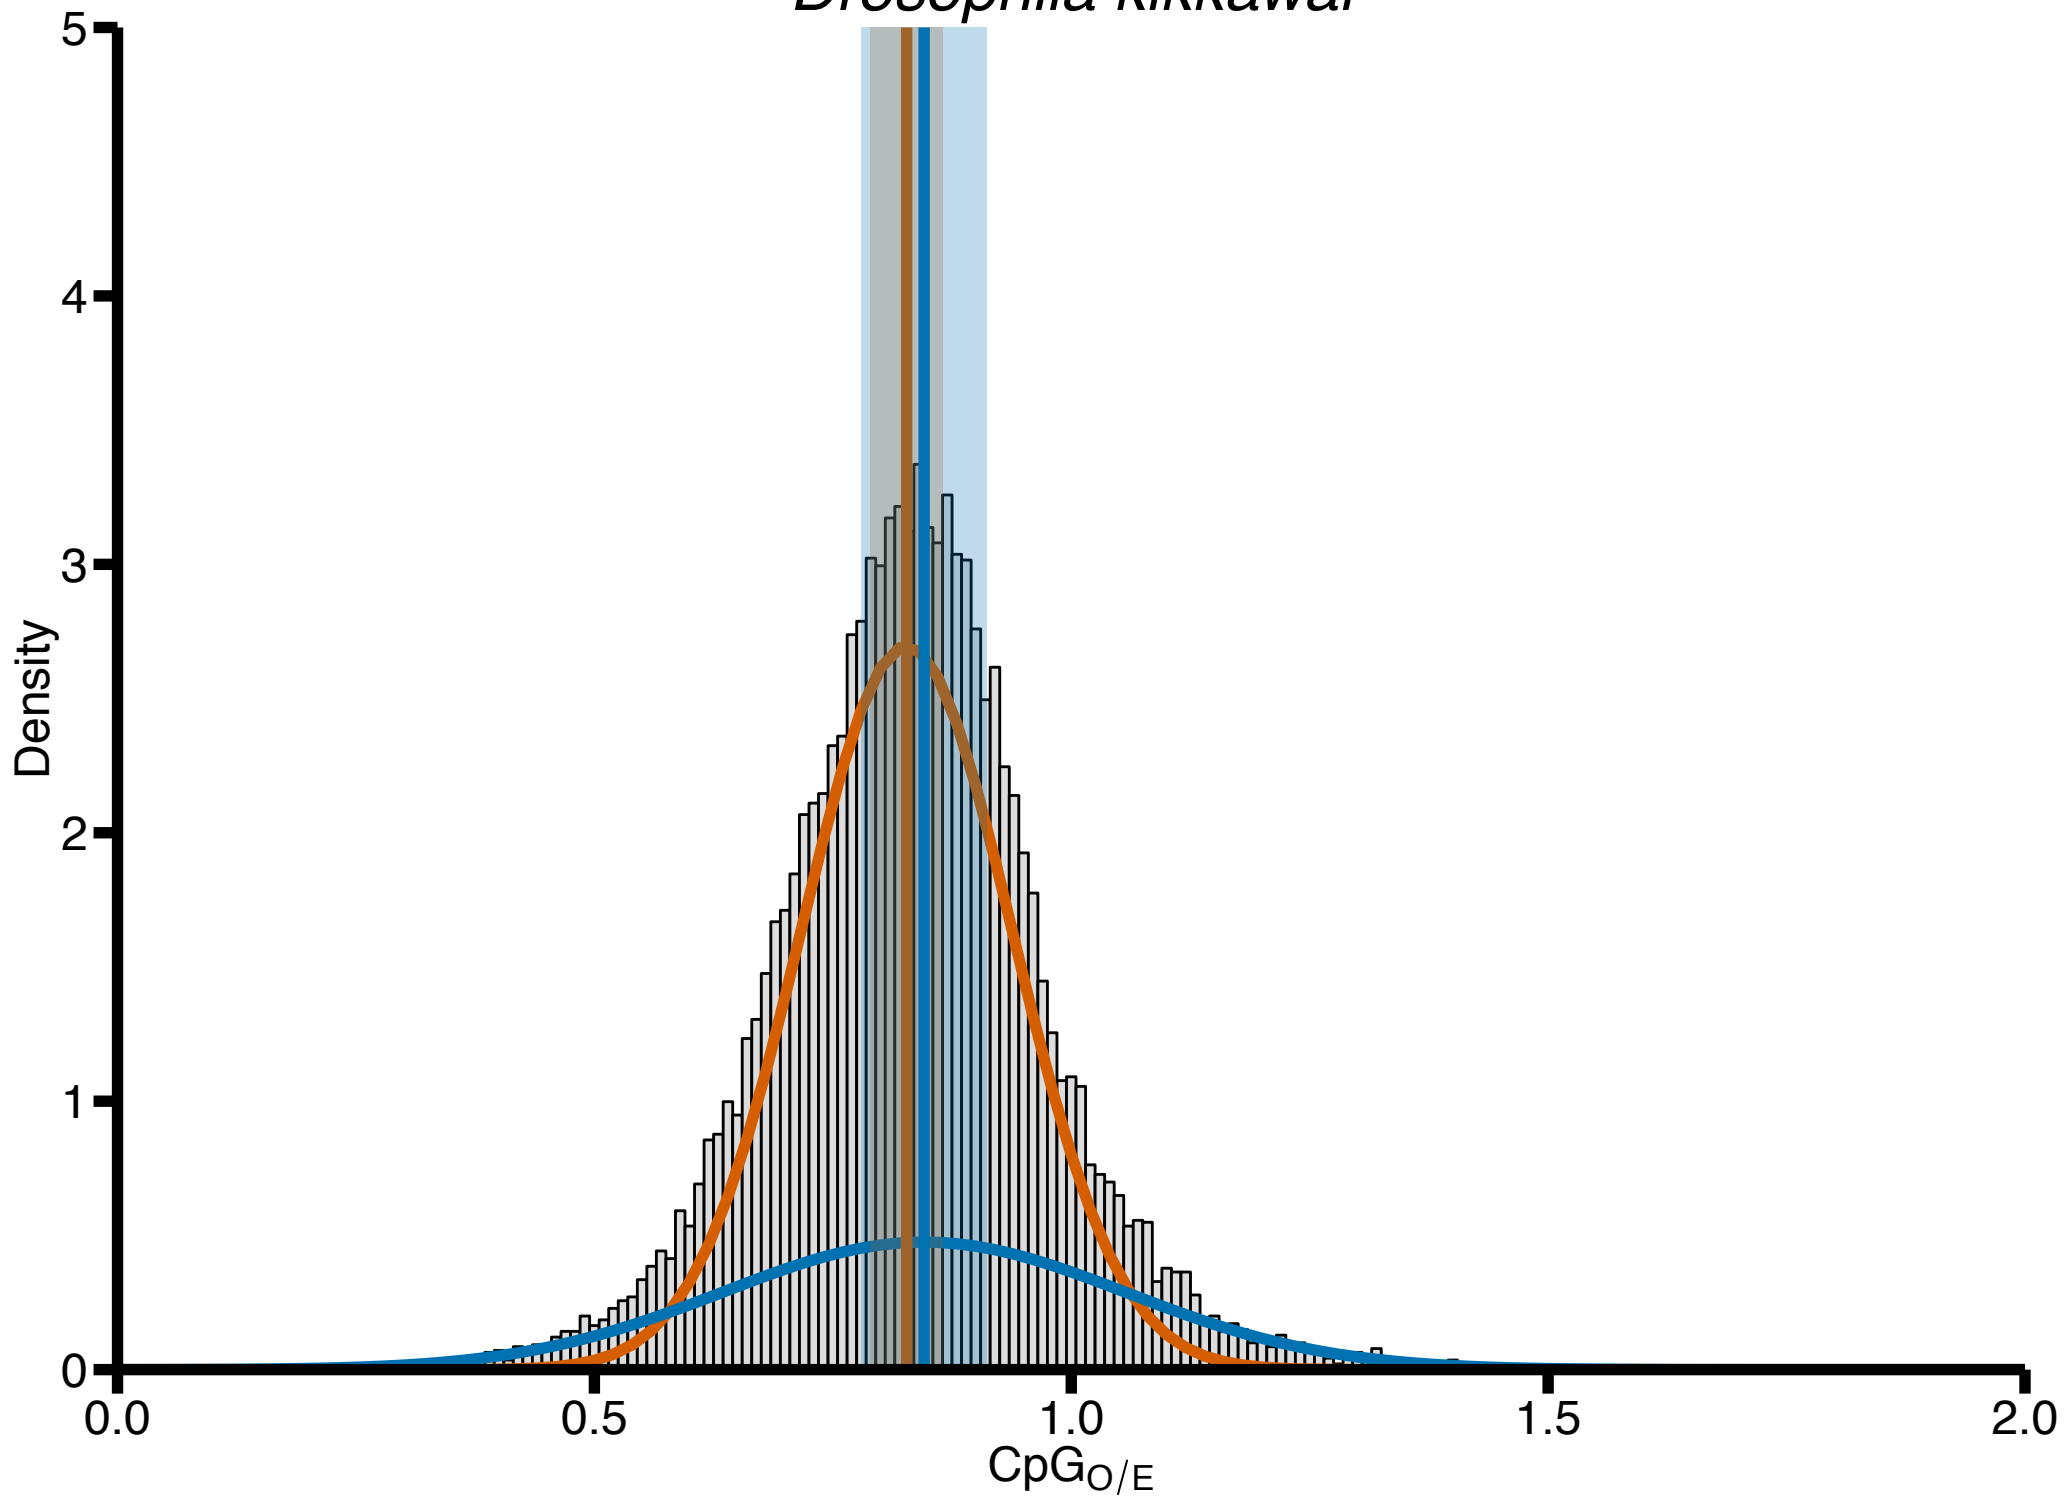

*Drosophila melanogaster*

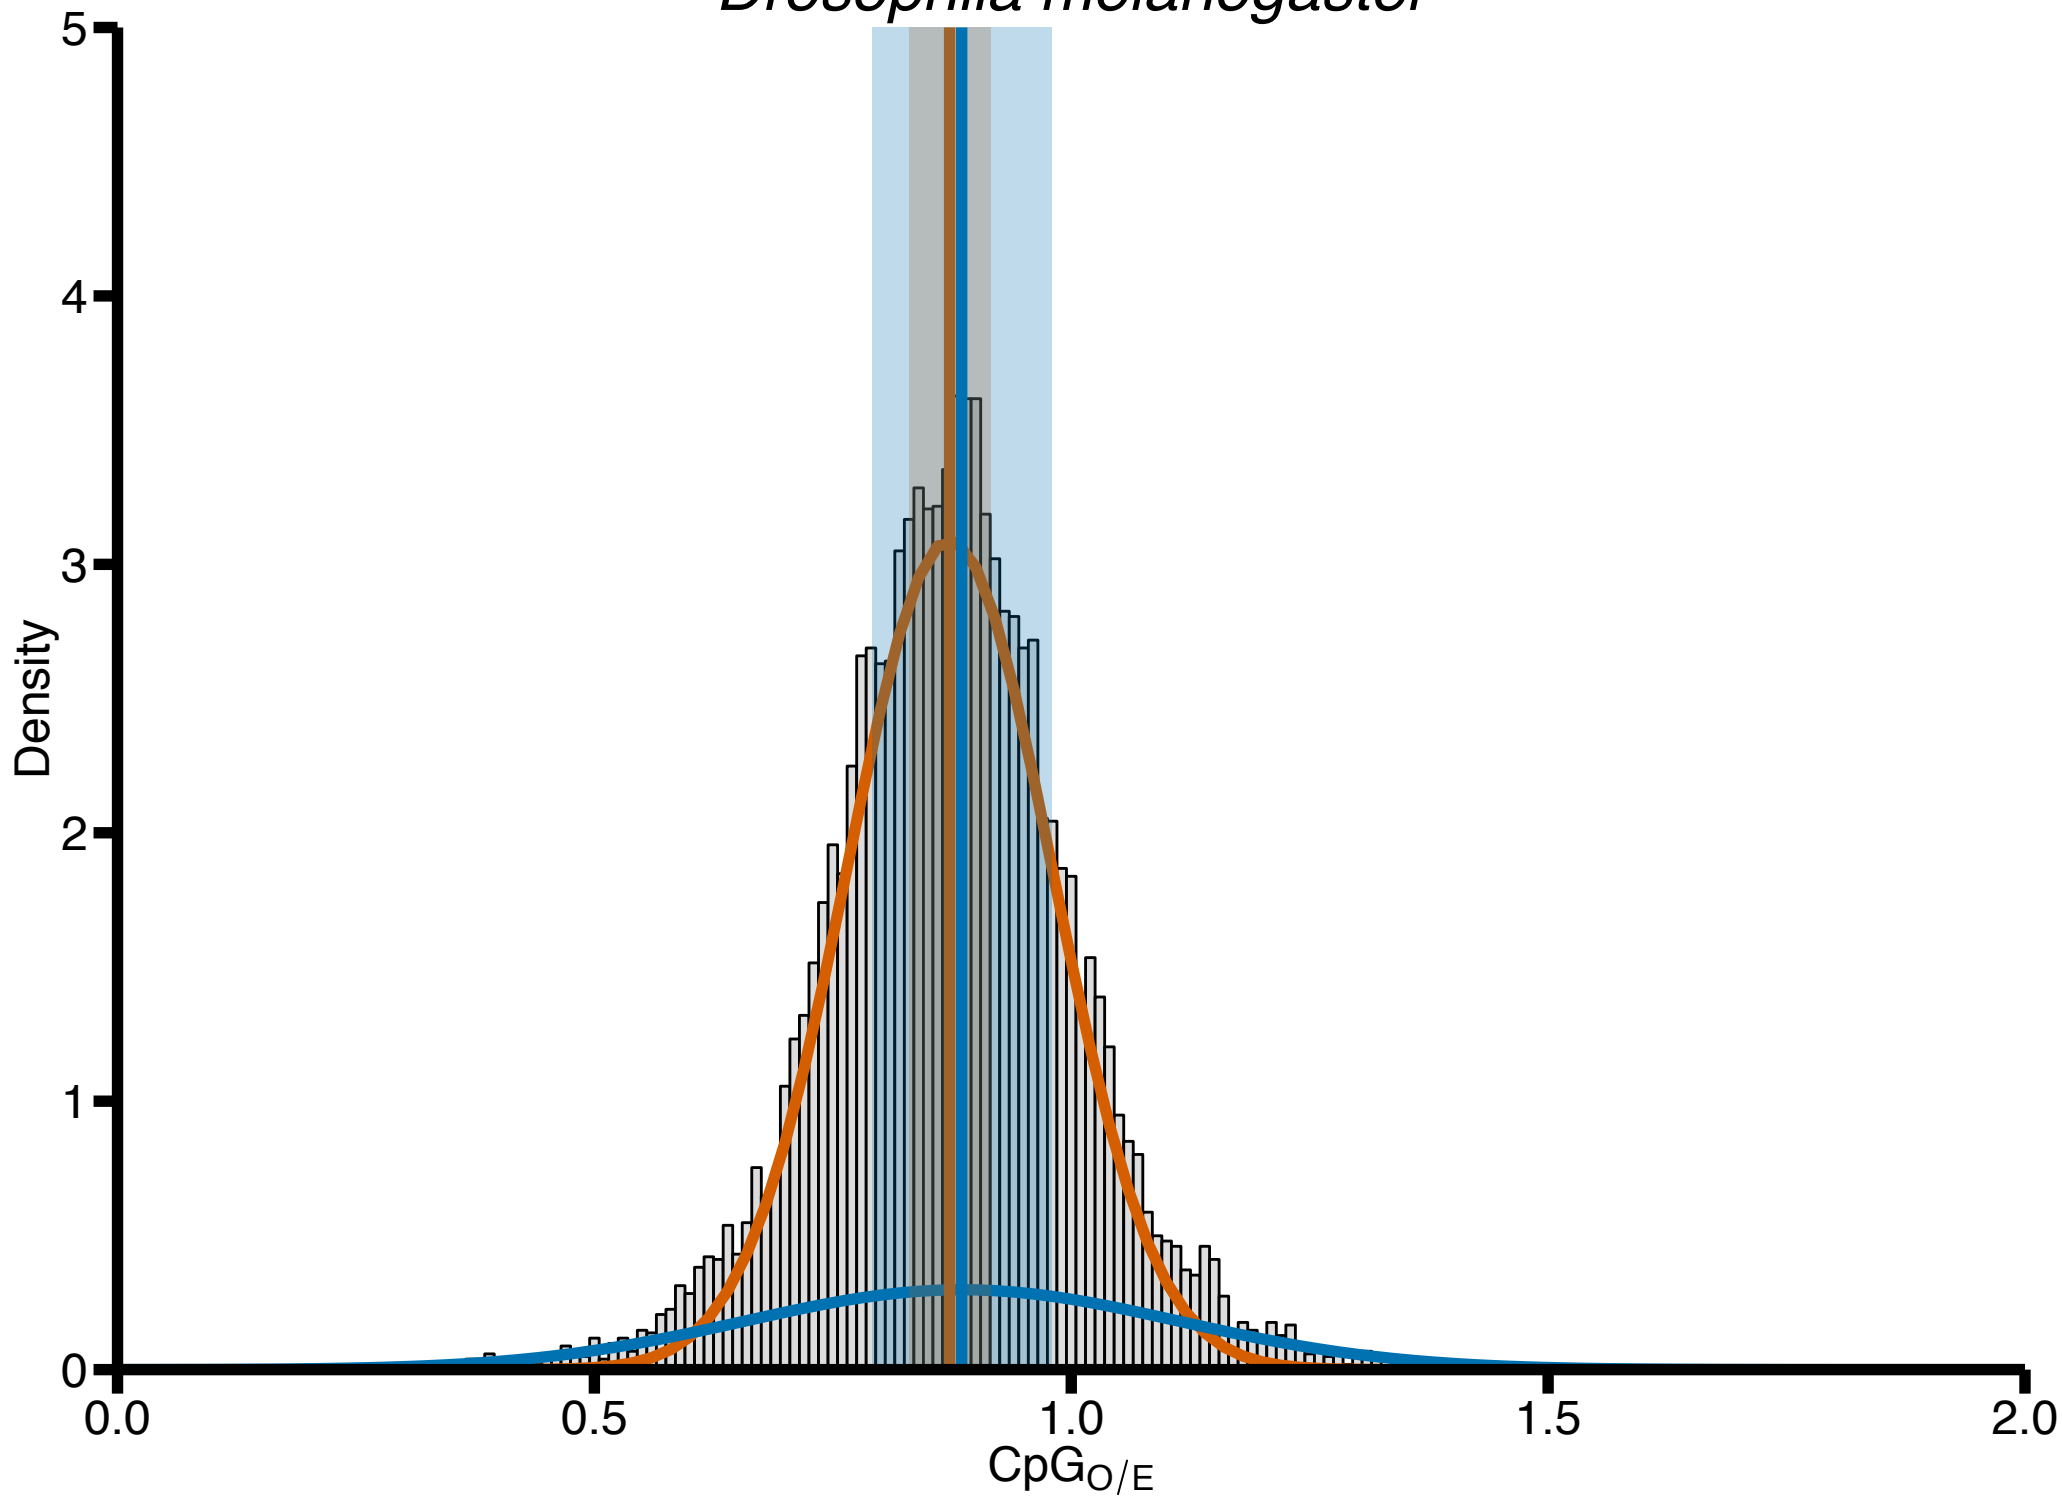

*Drosophila mojavensis*

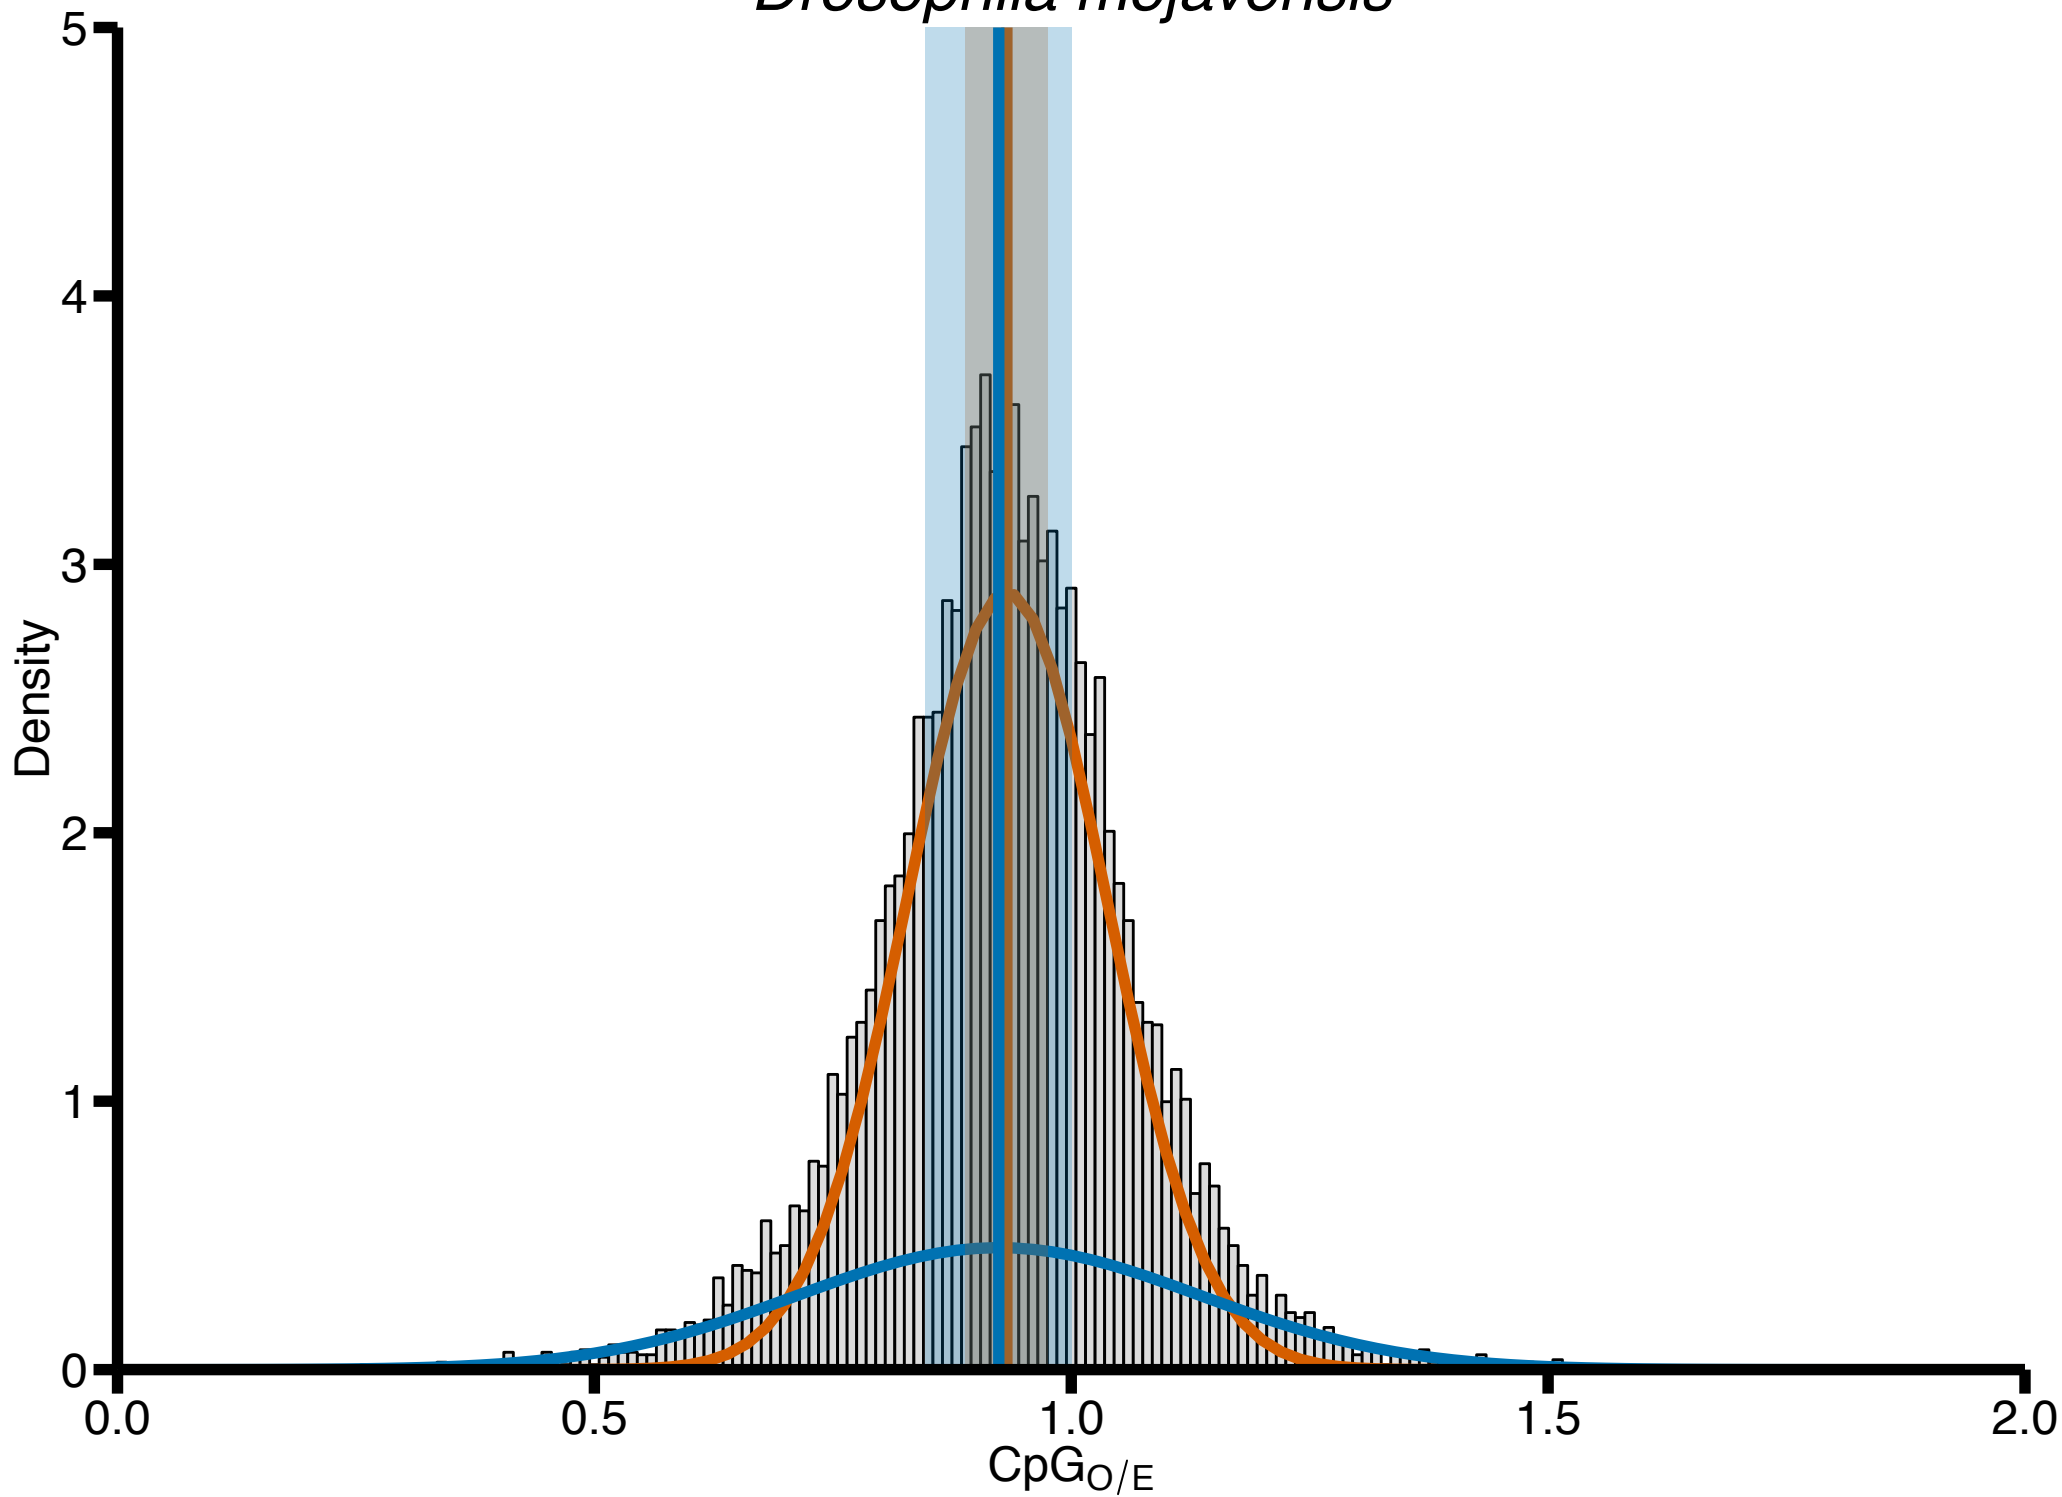

*Drosophila persimilis*

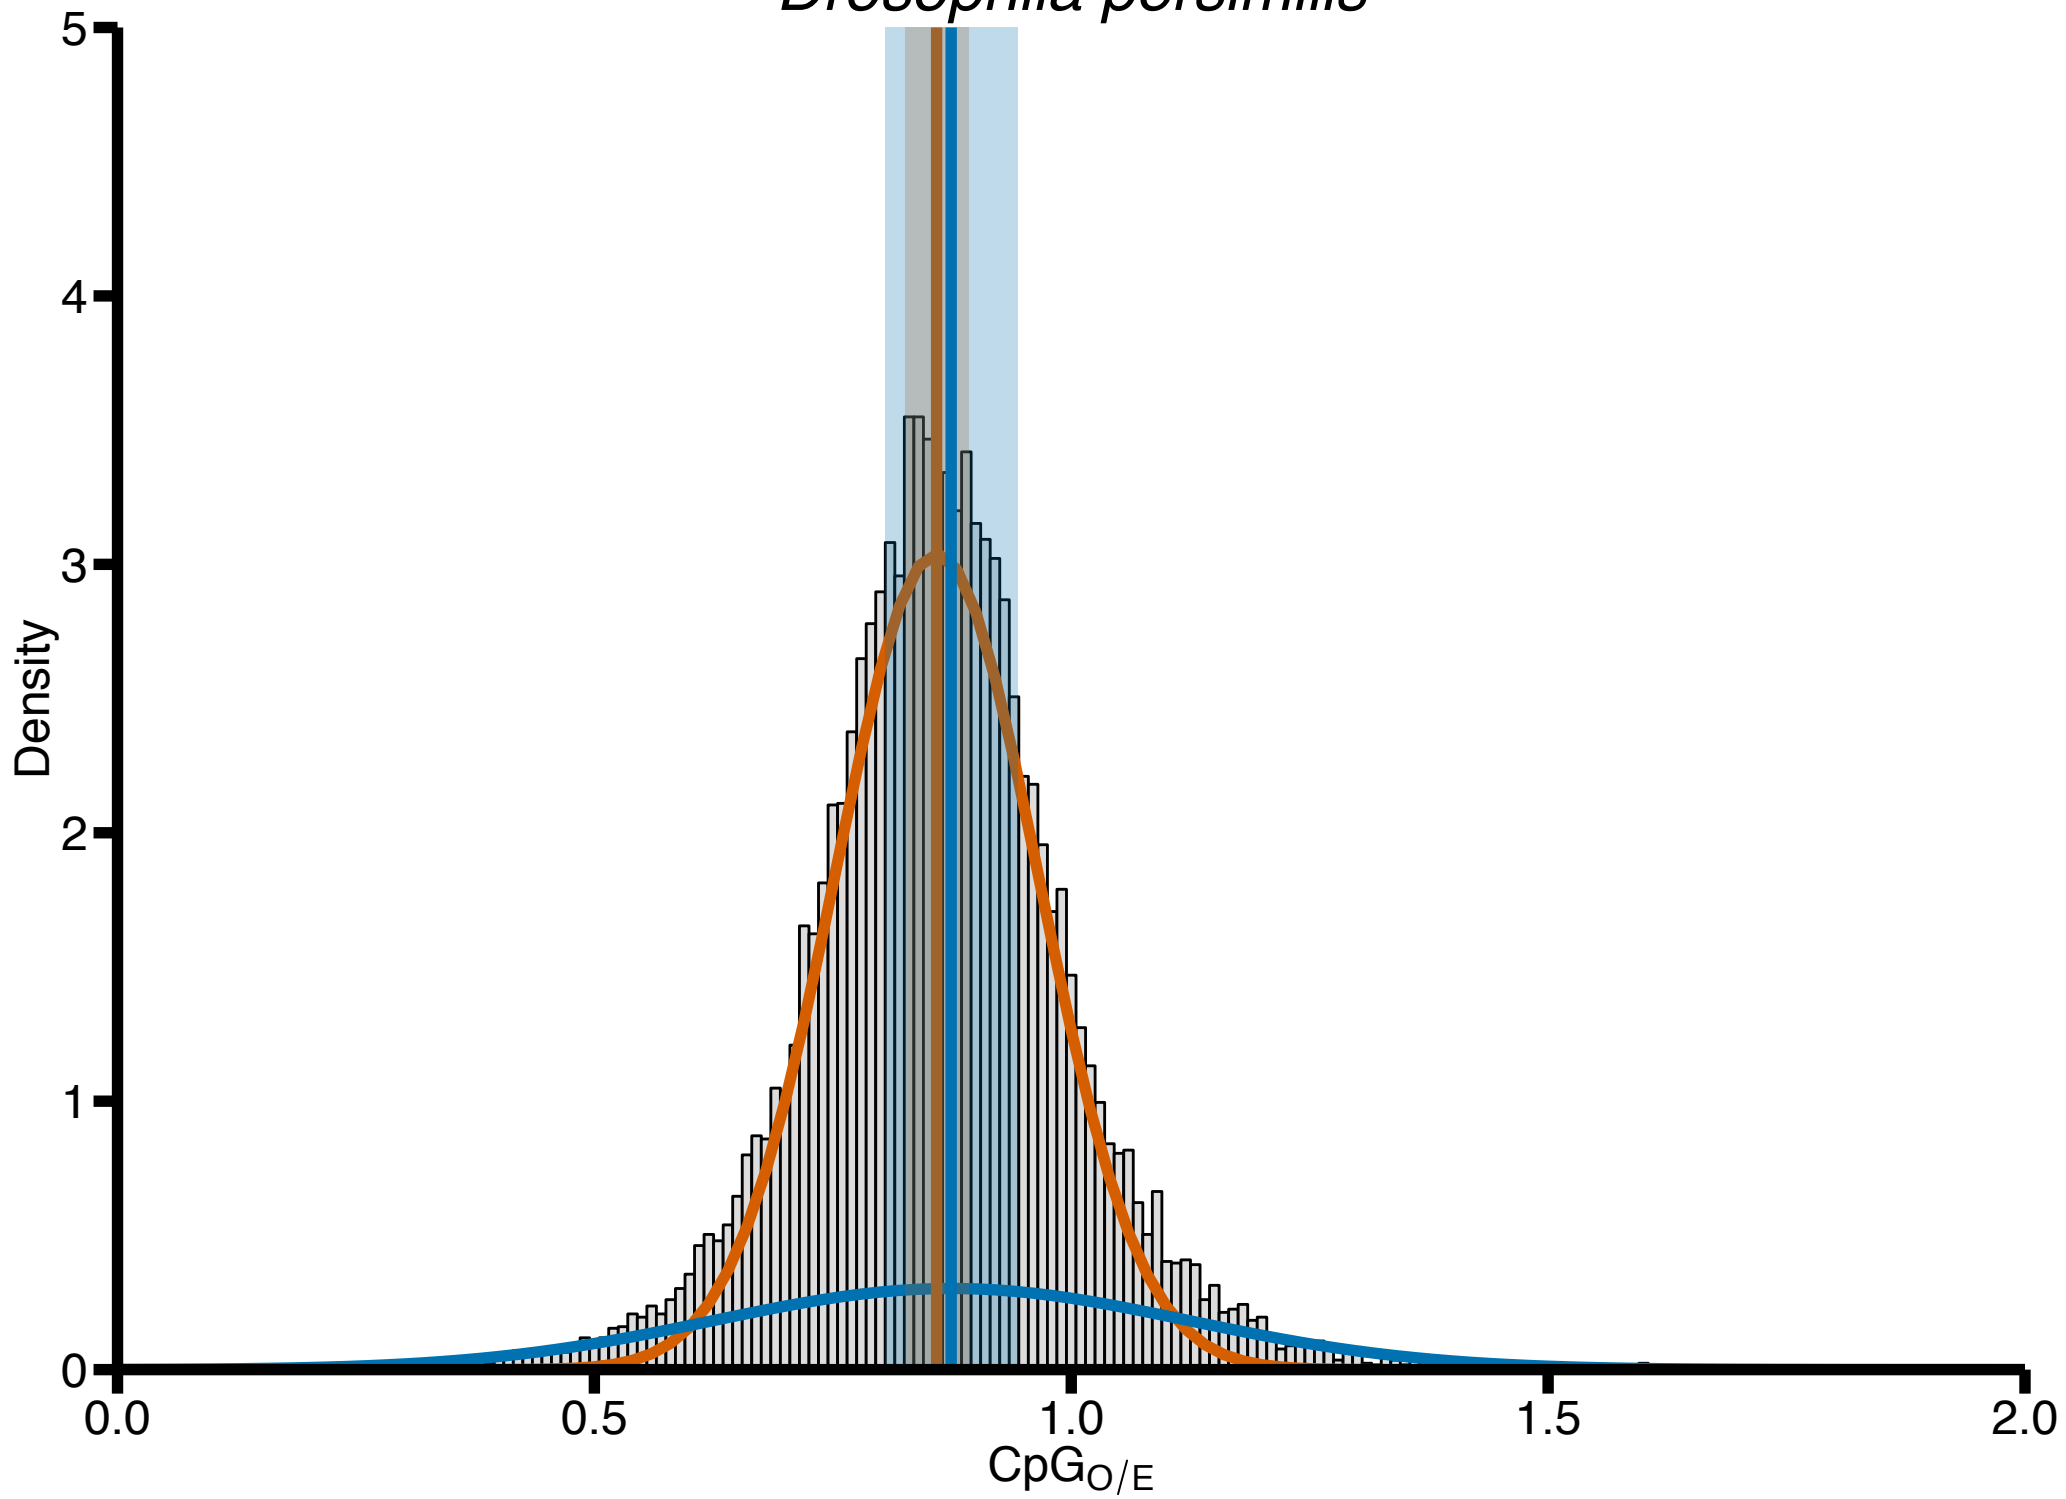

*Drosophila pseudoobscura*

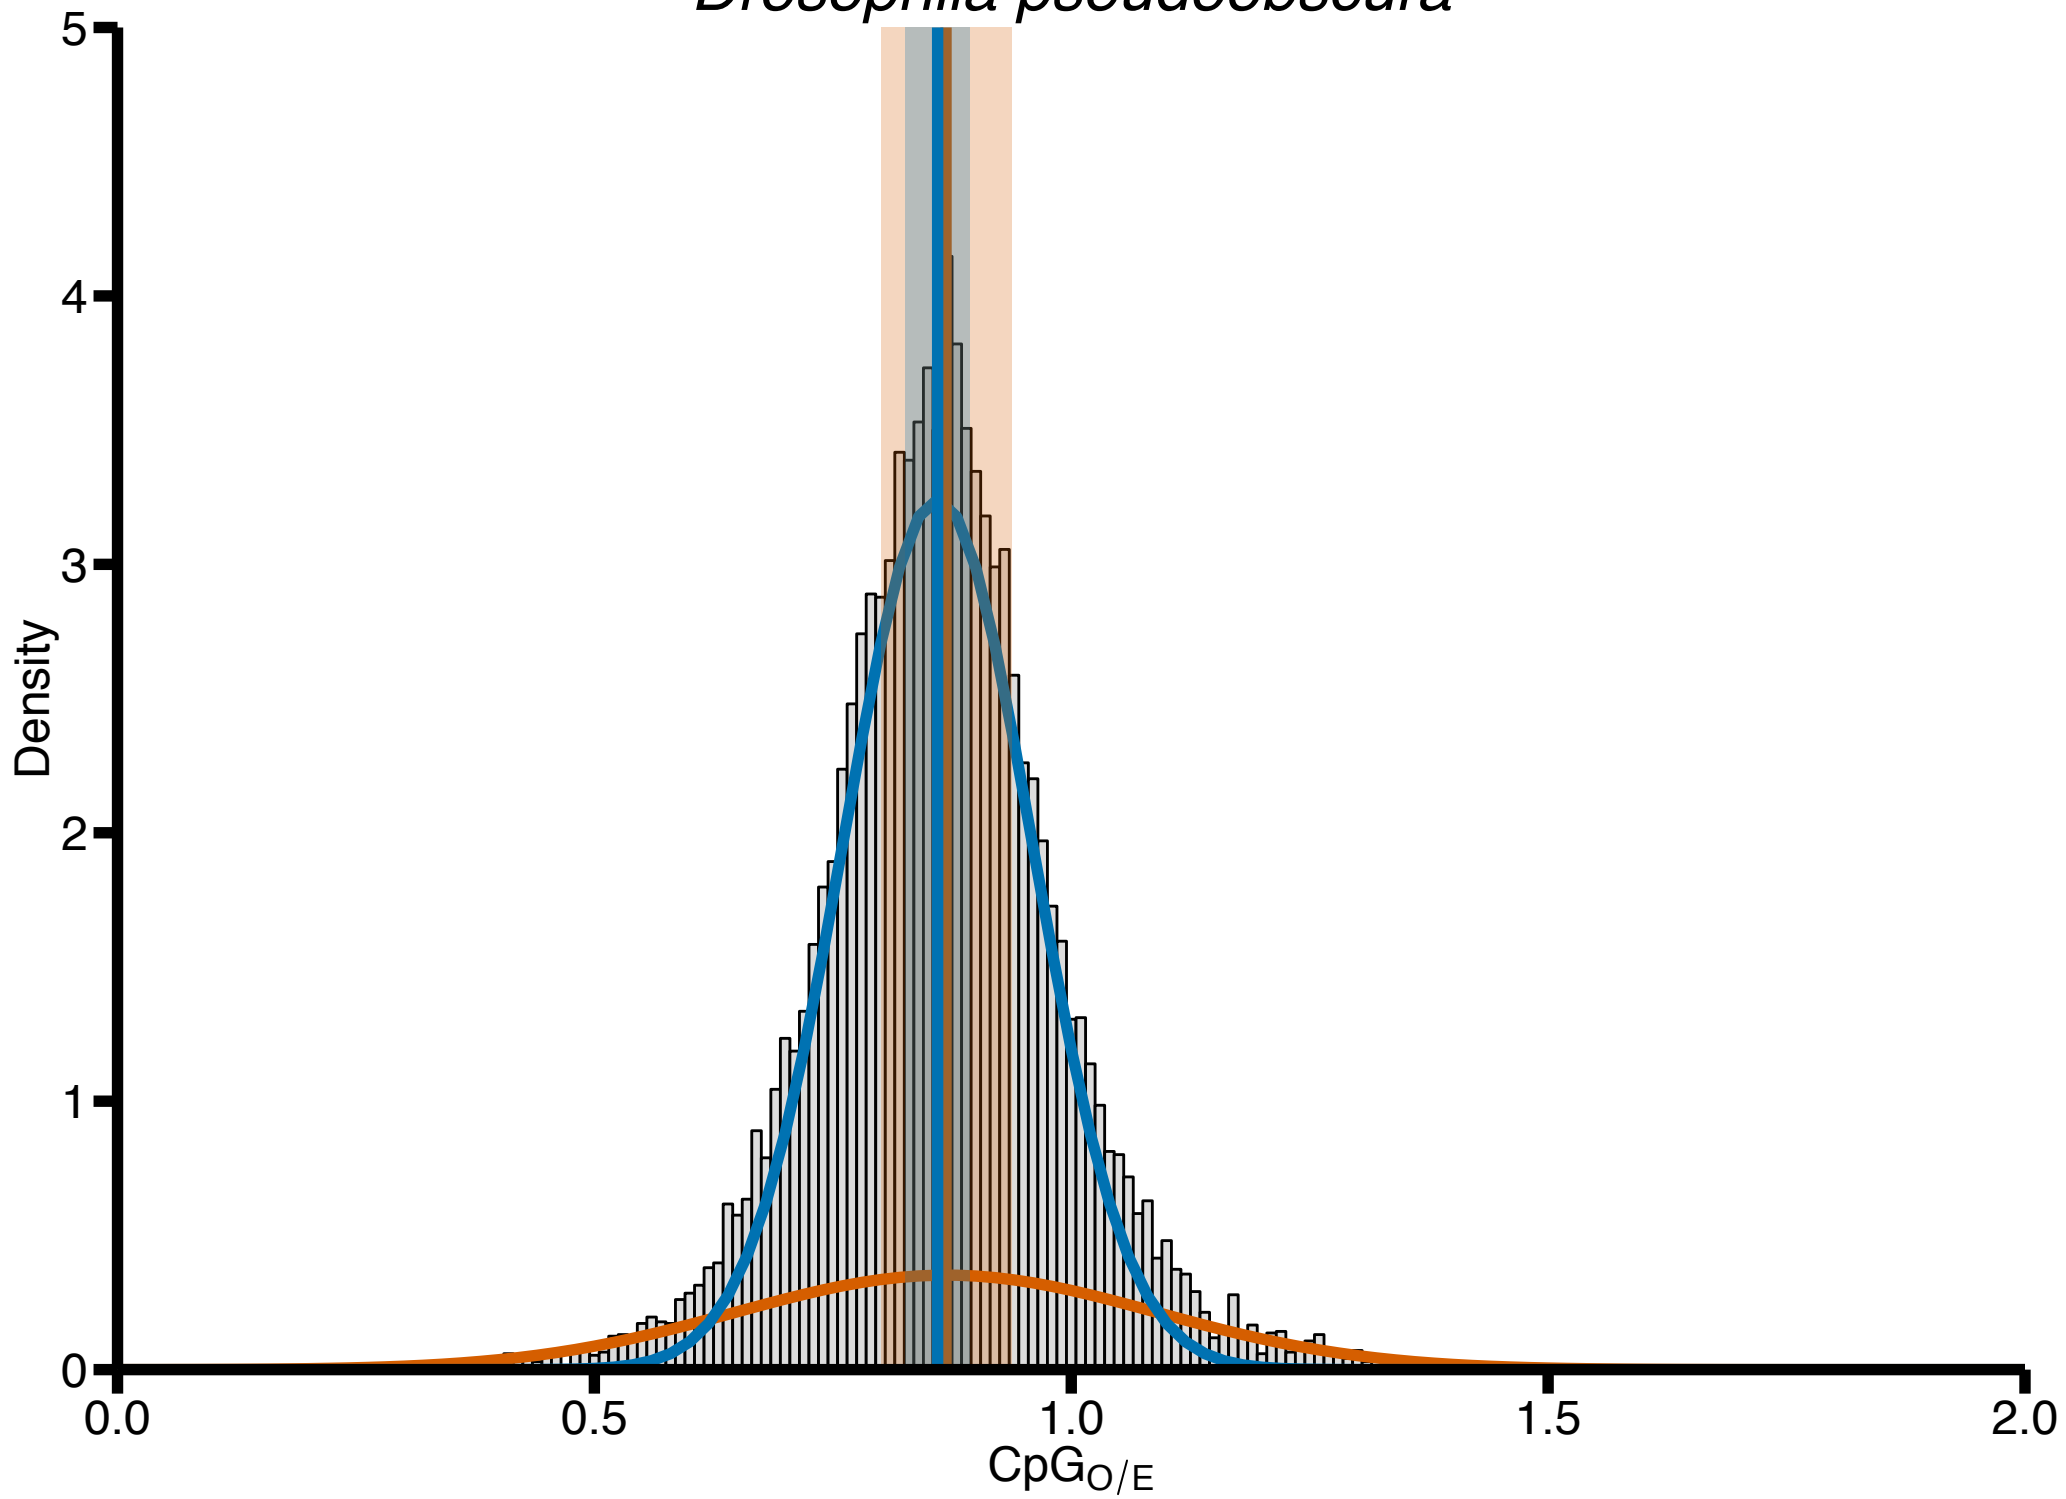



*Drosophila rhopaloea*

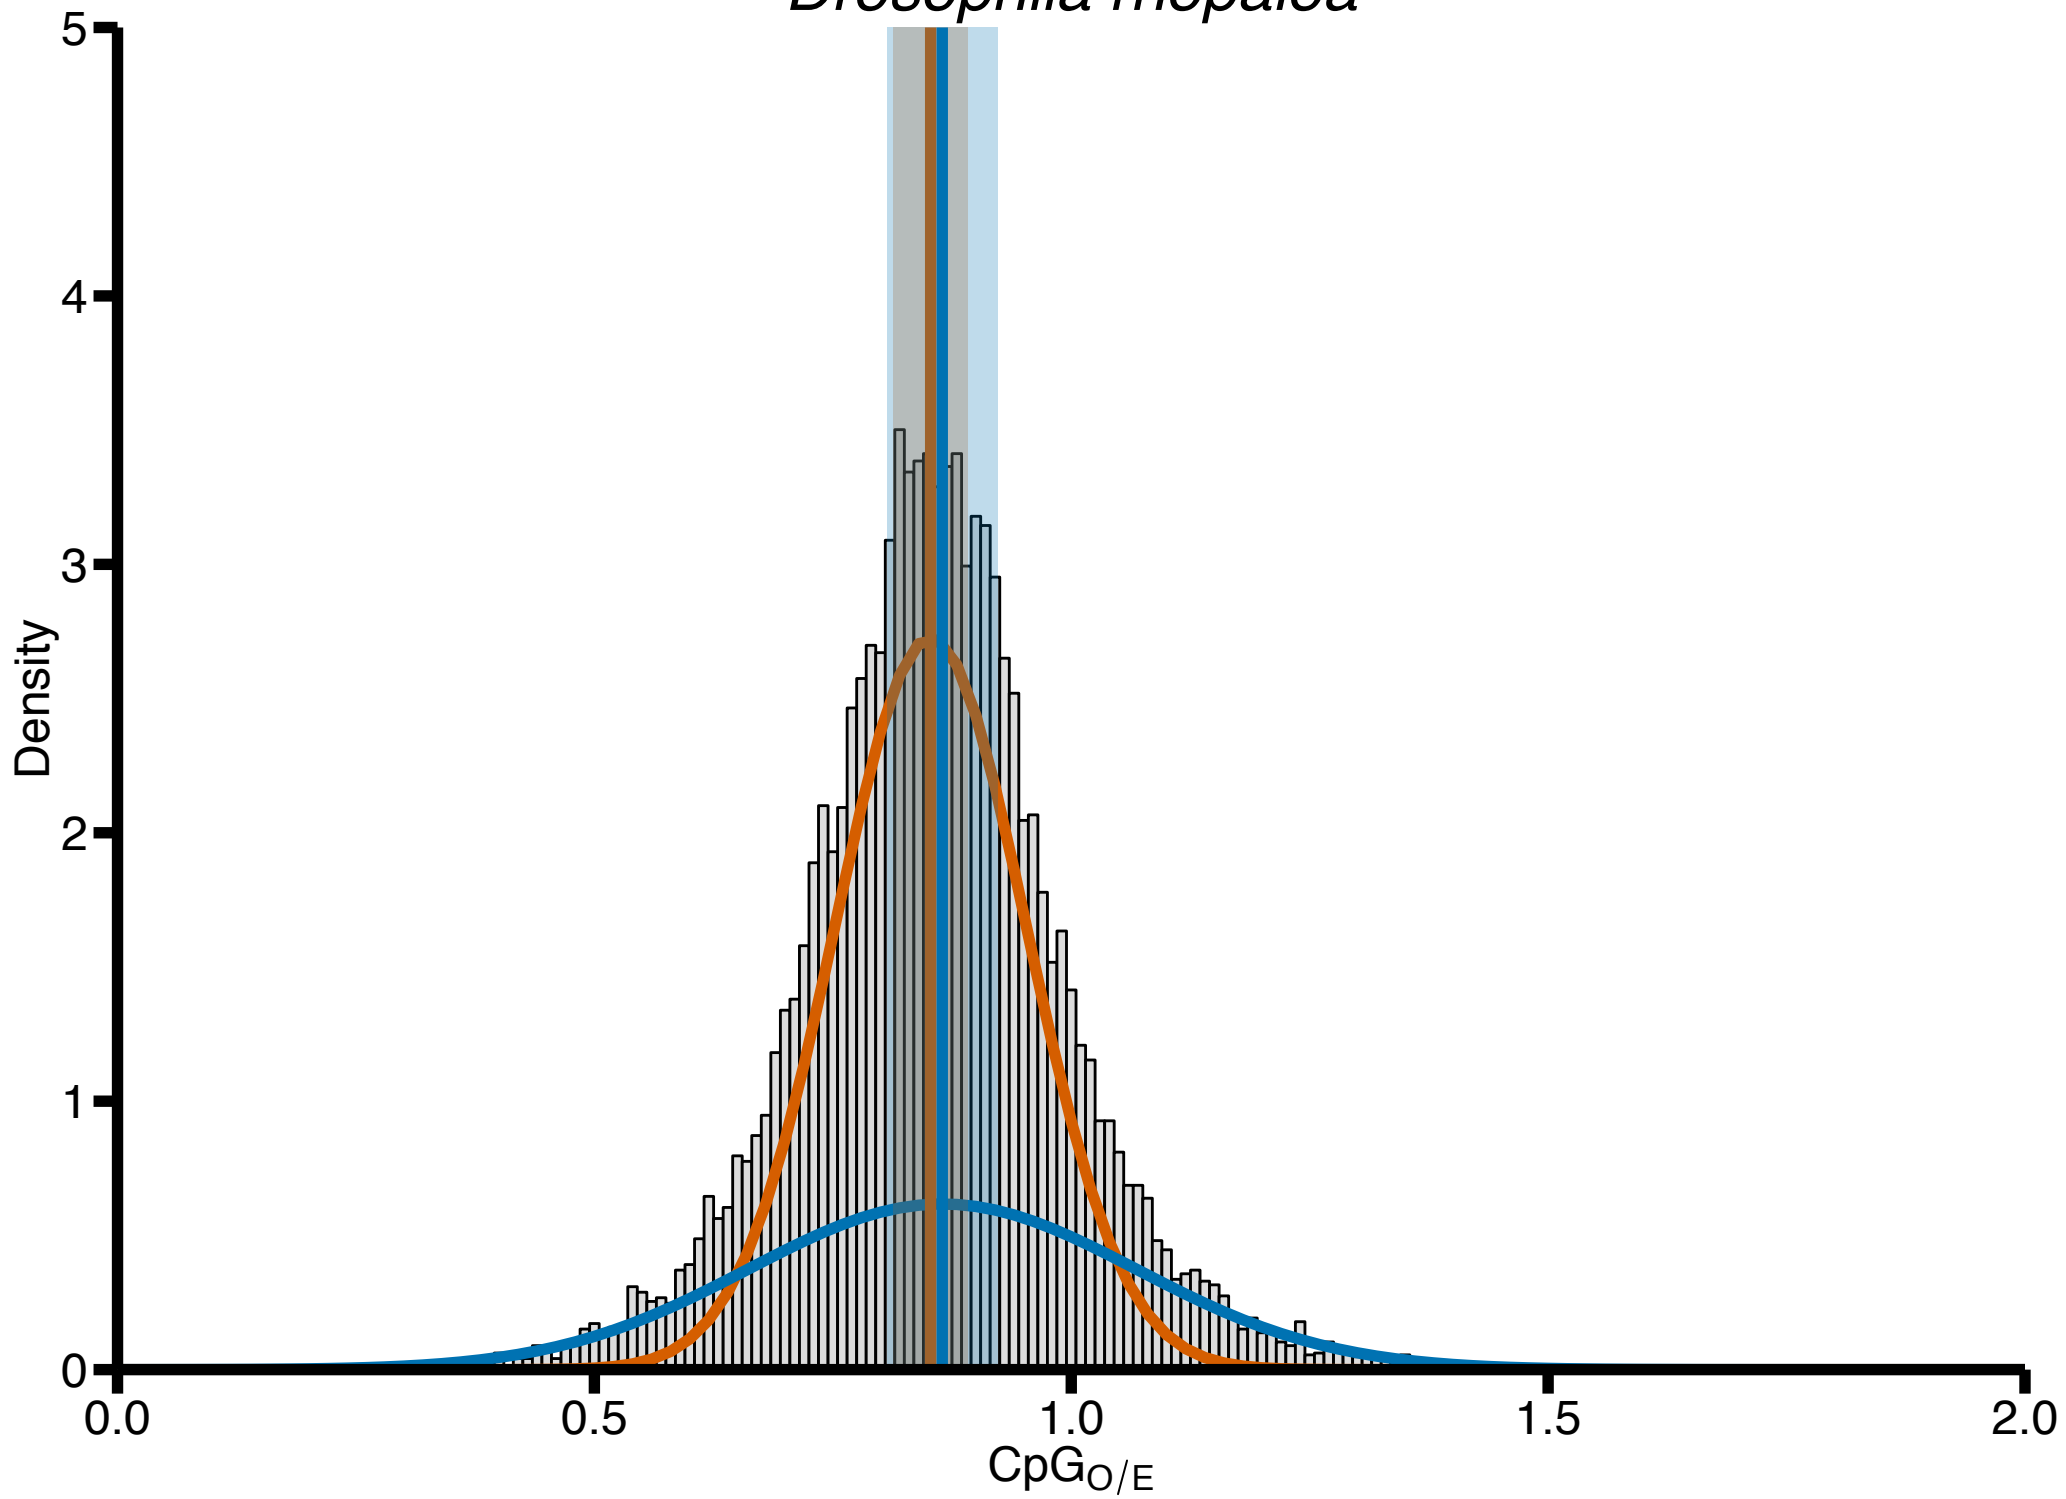

*Drosophila sechellia*

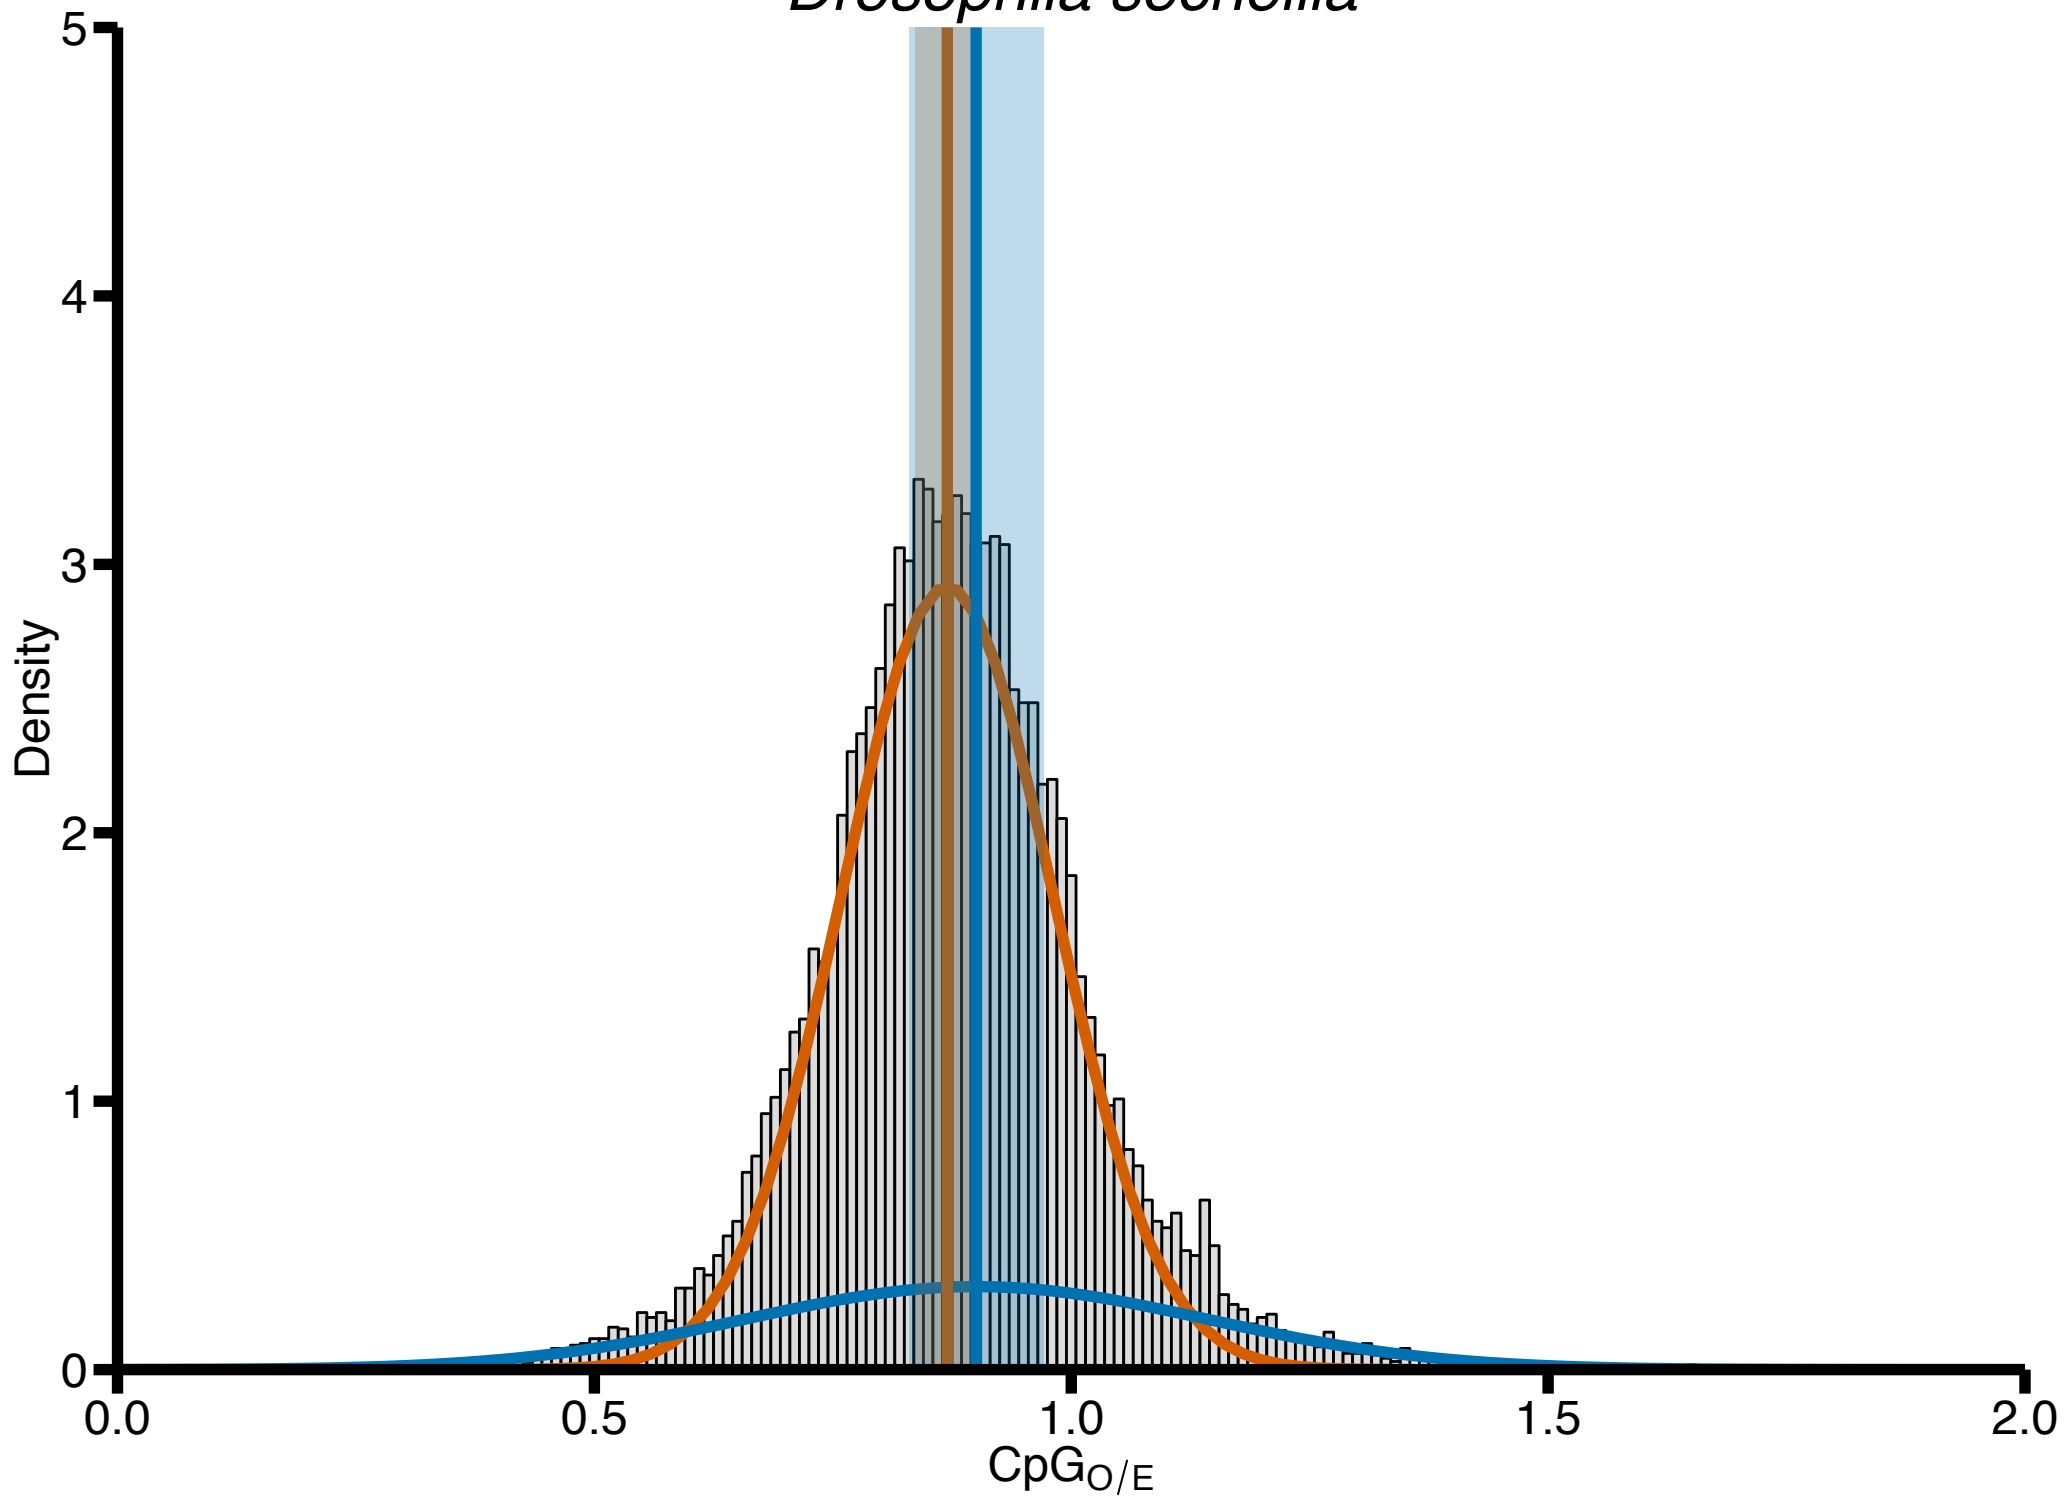

*Drosophila simulans*

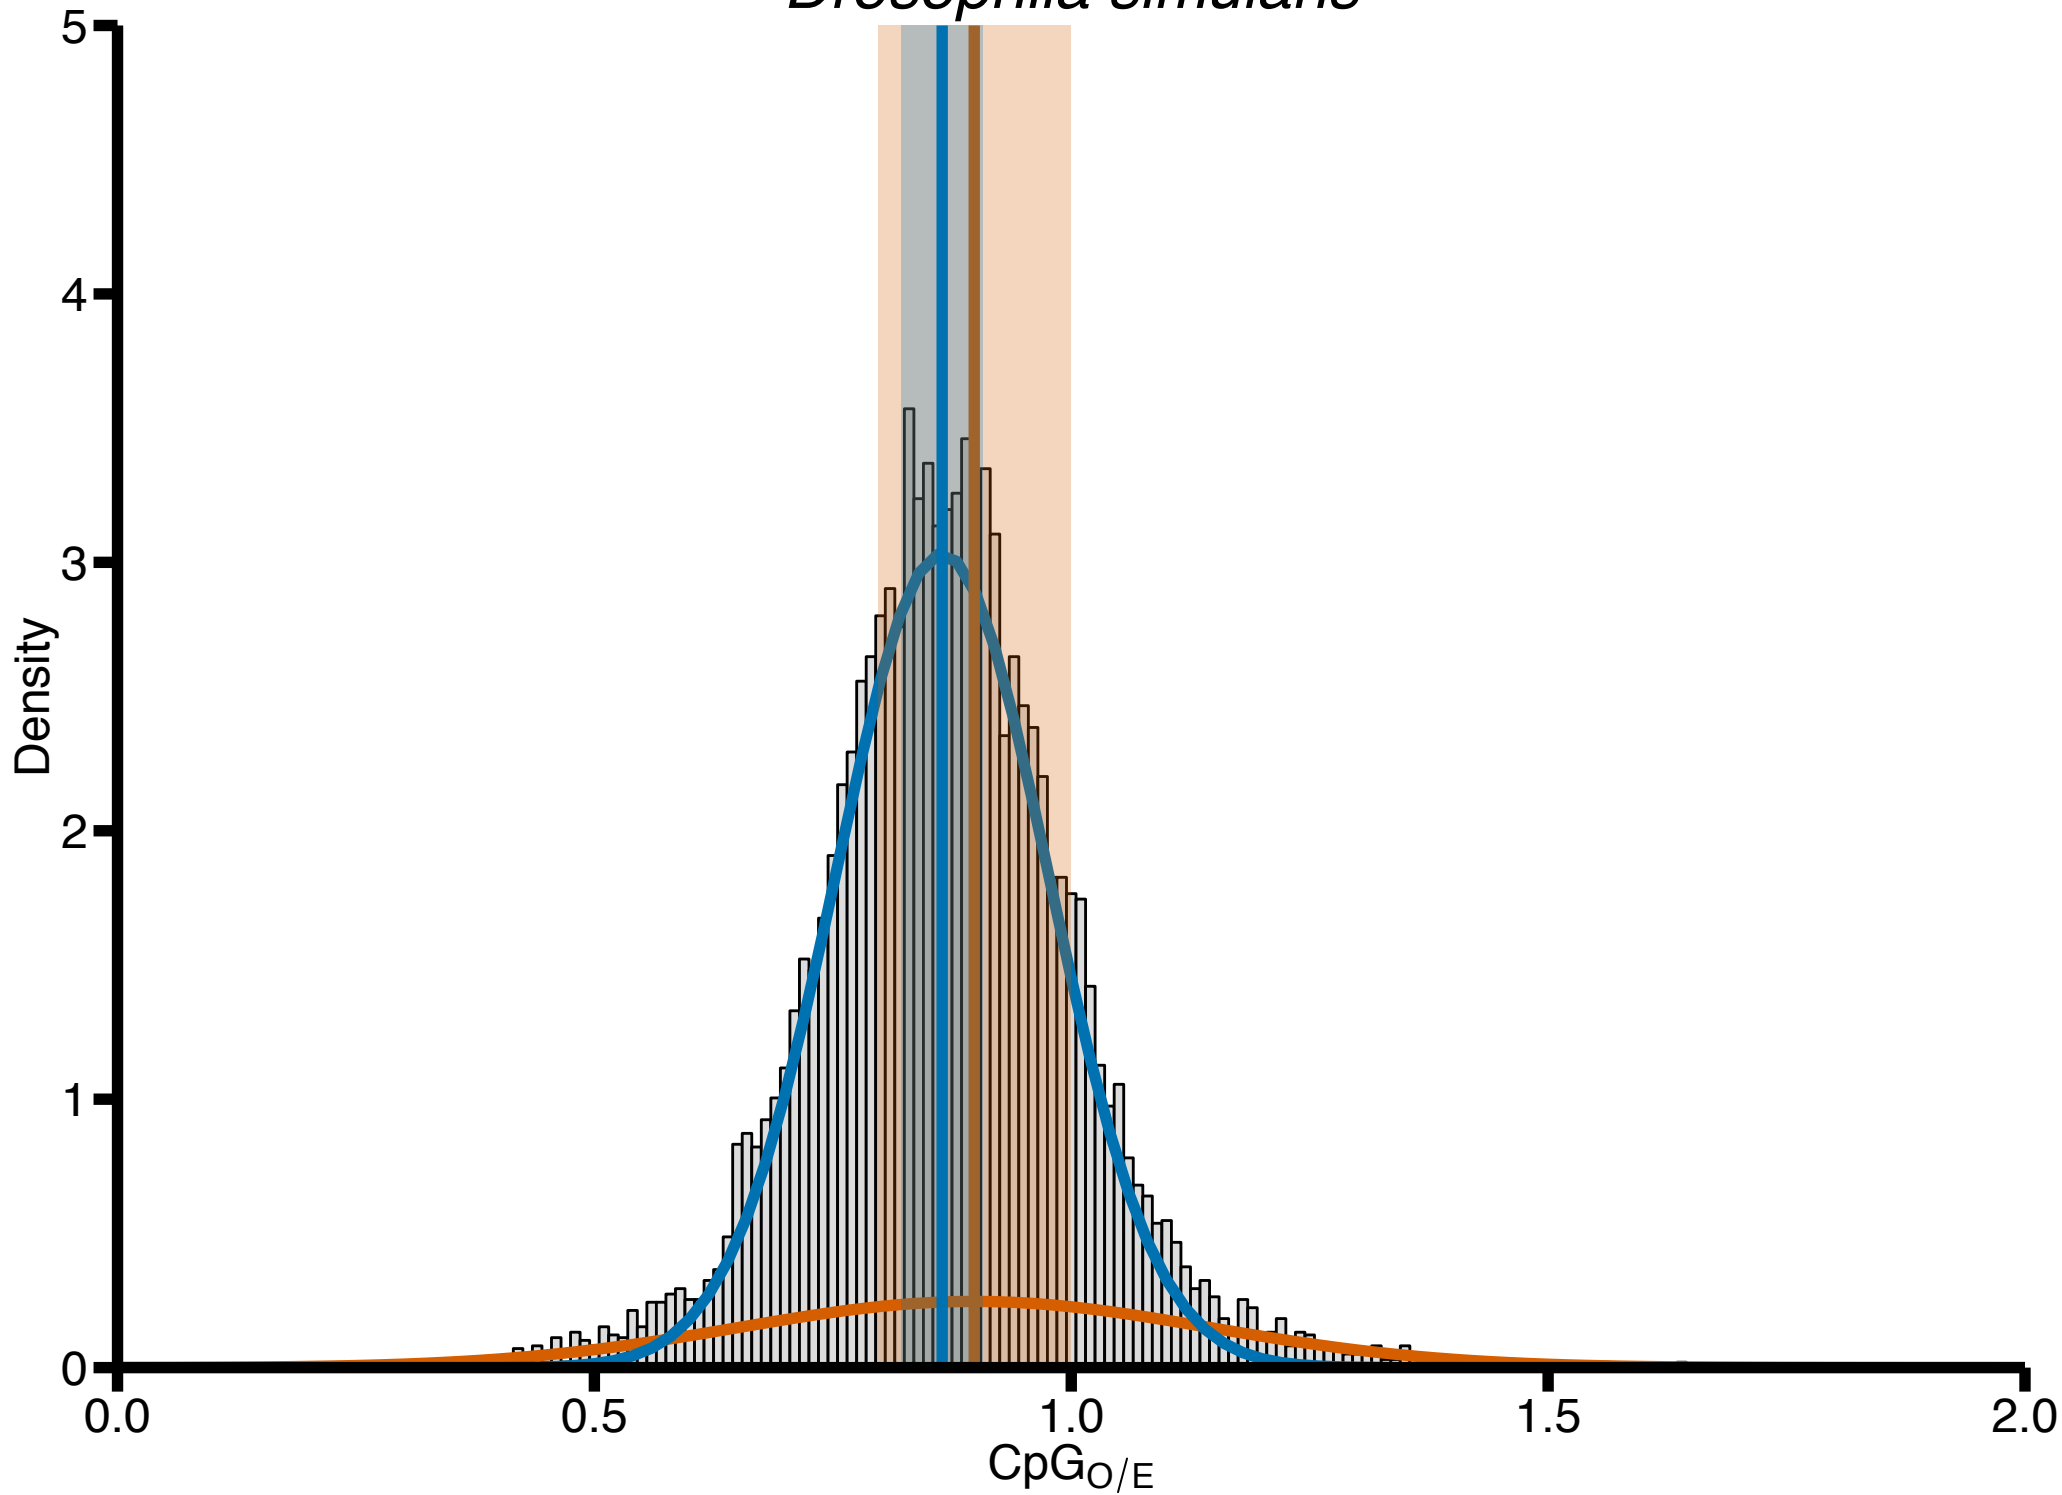

*Drosophila suzukii*

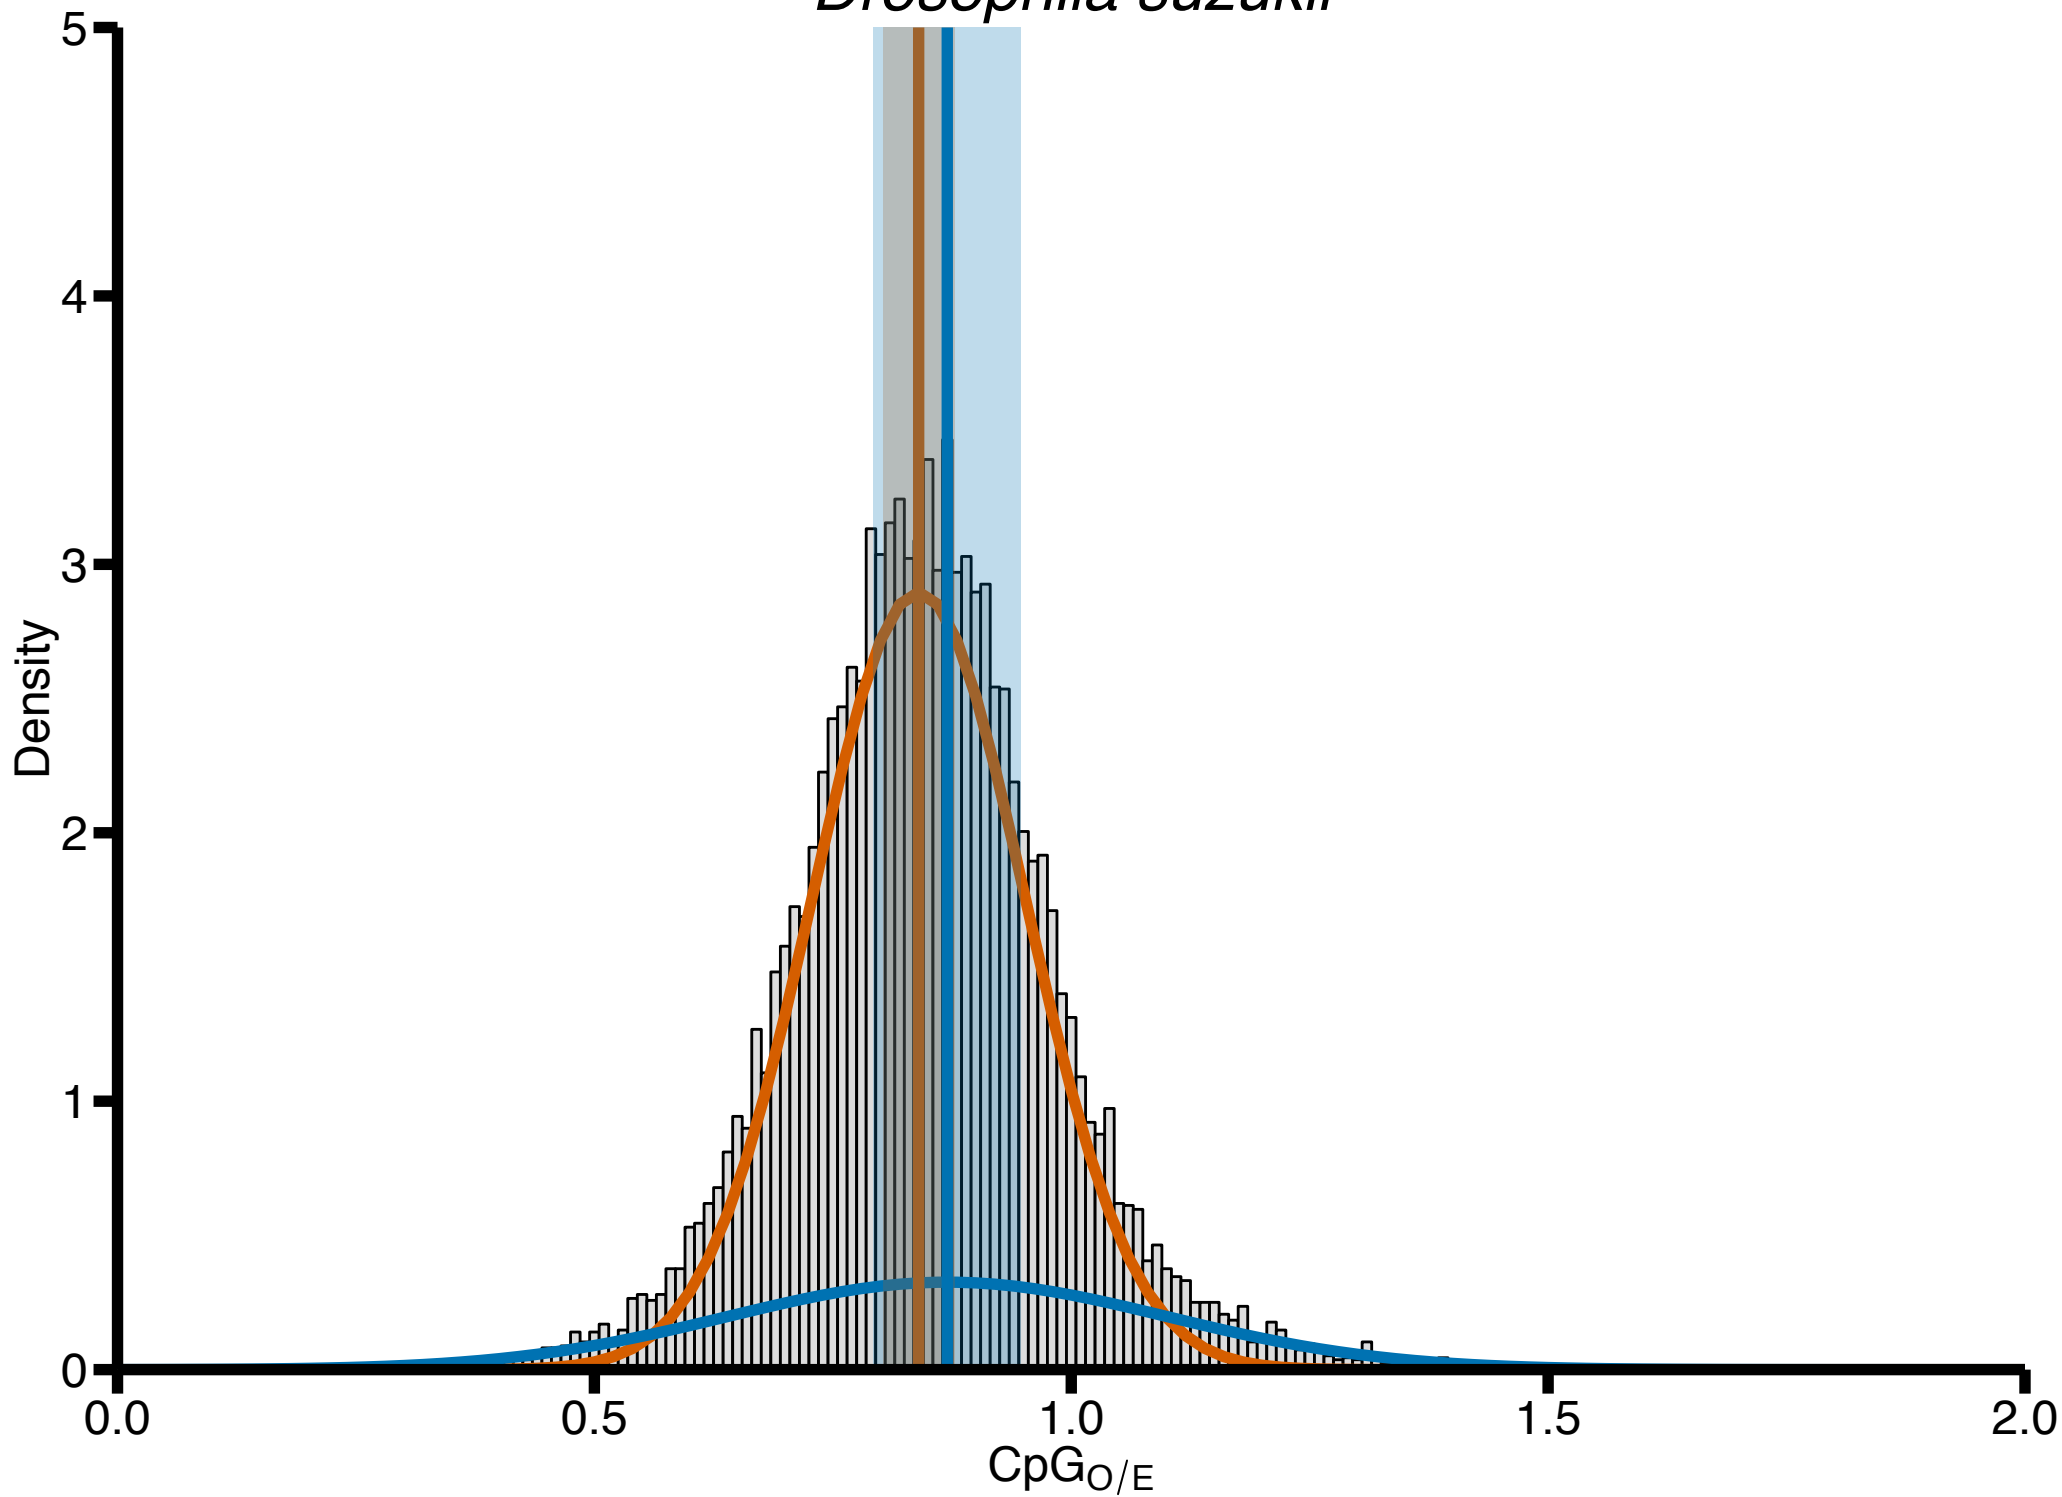

*Drosophila takahashii*

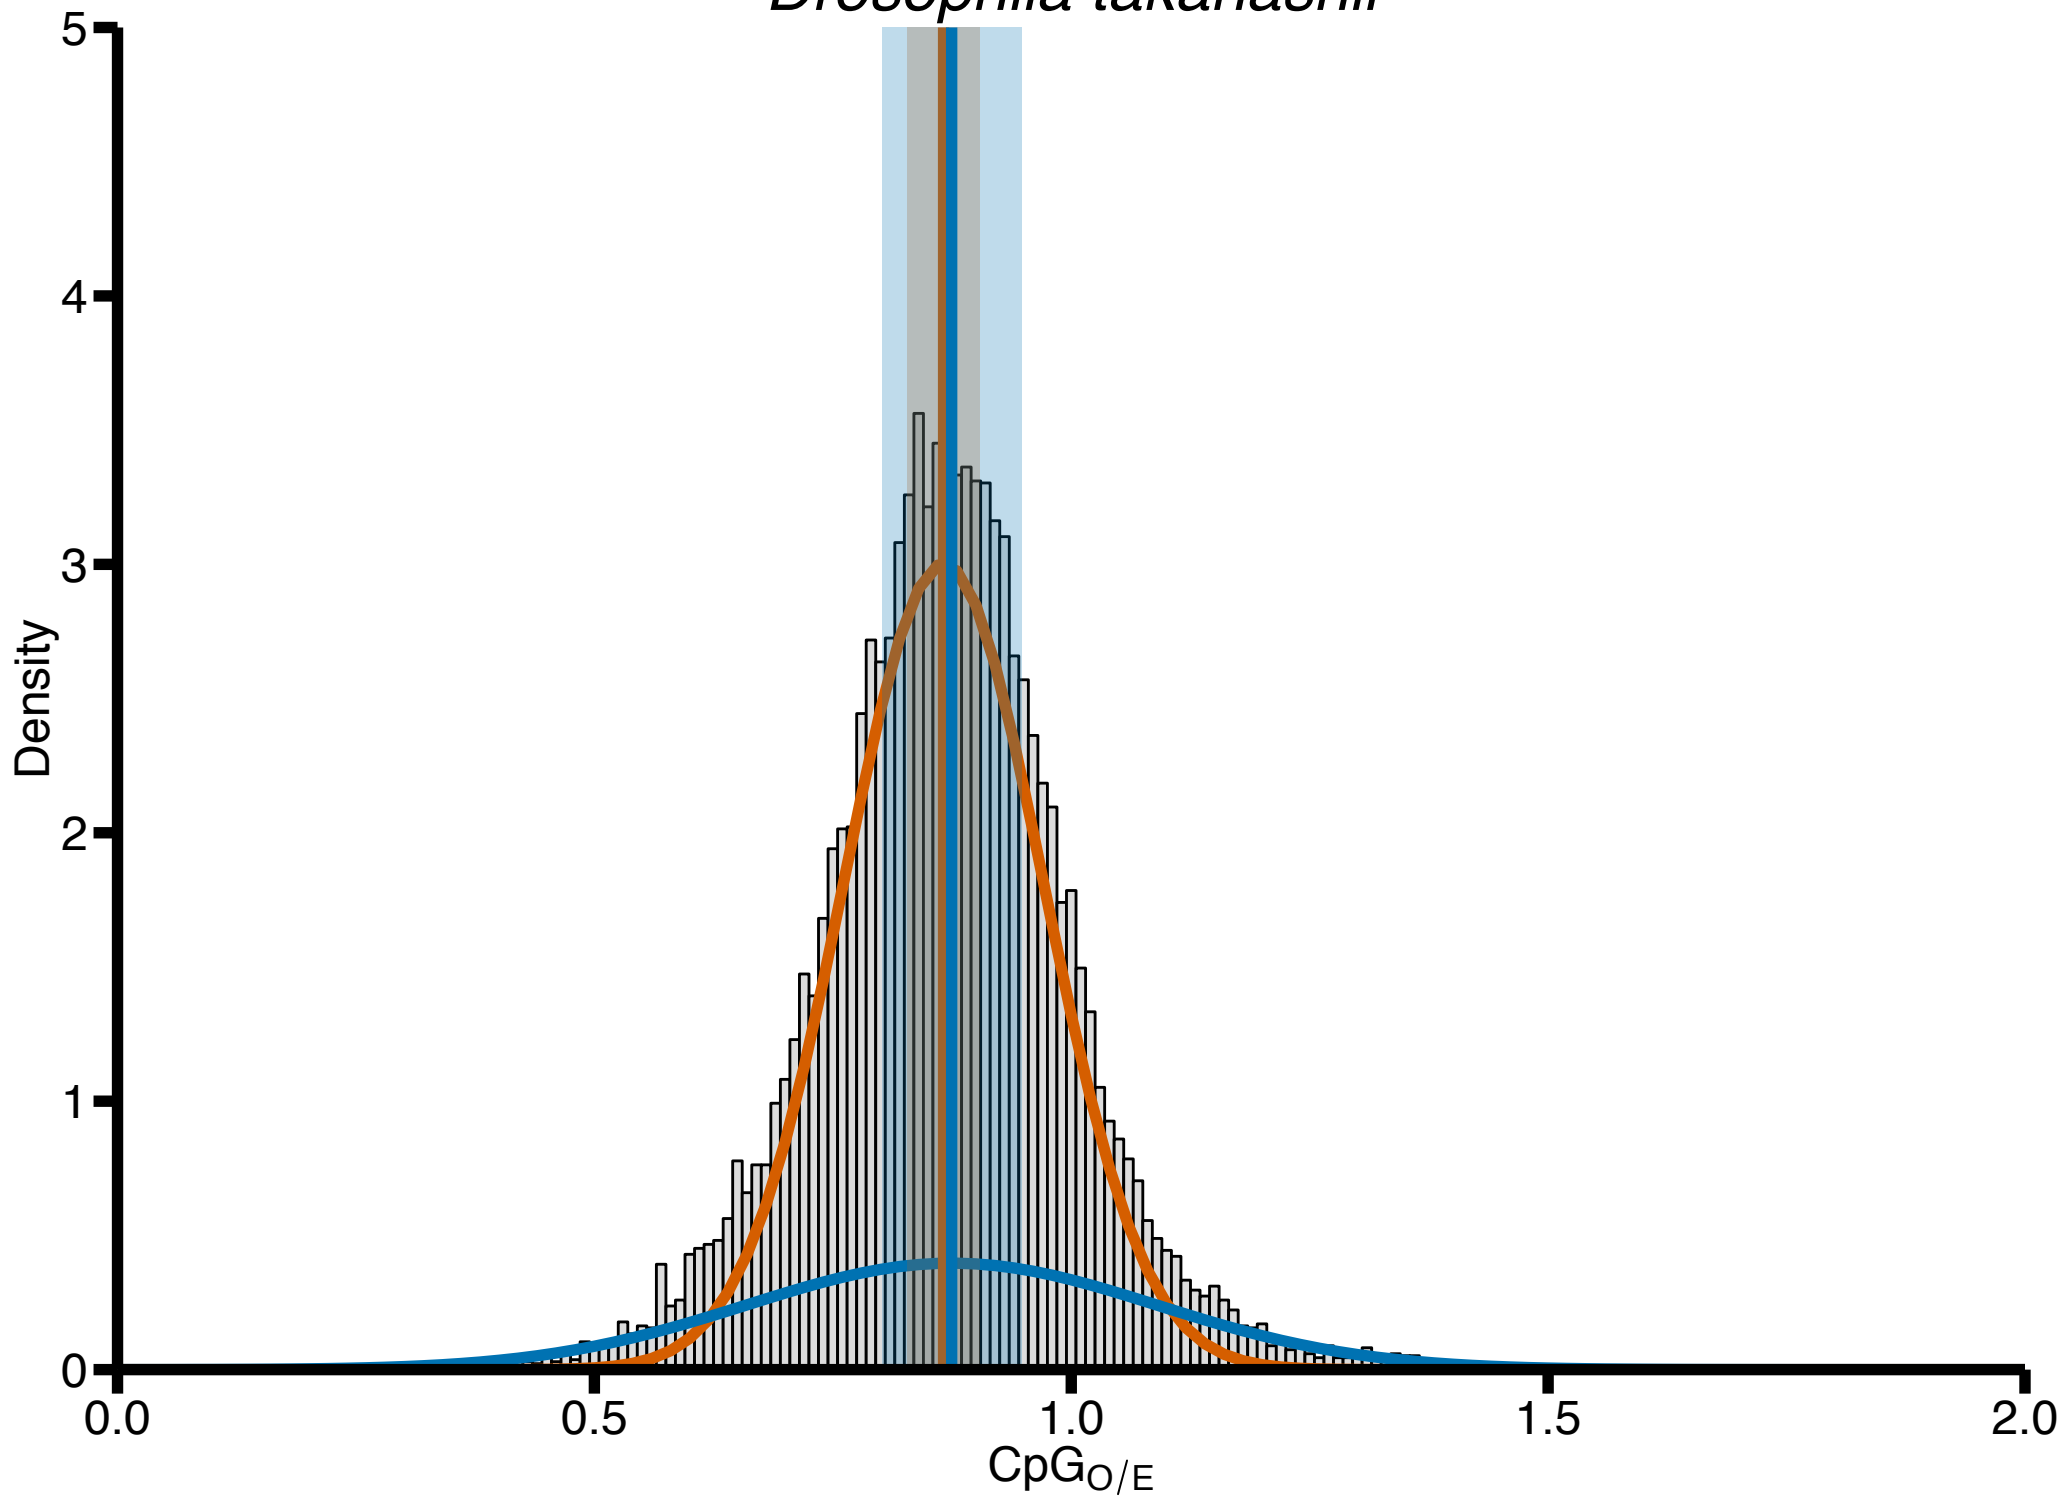

*Drosophila virilis*

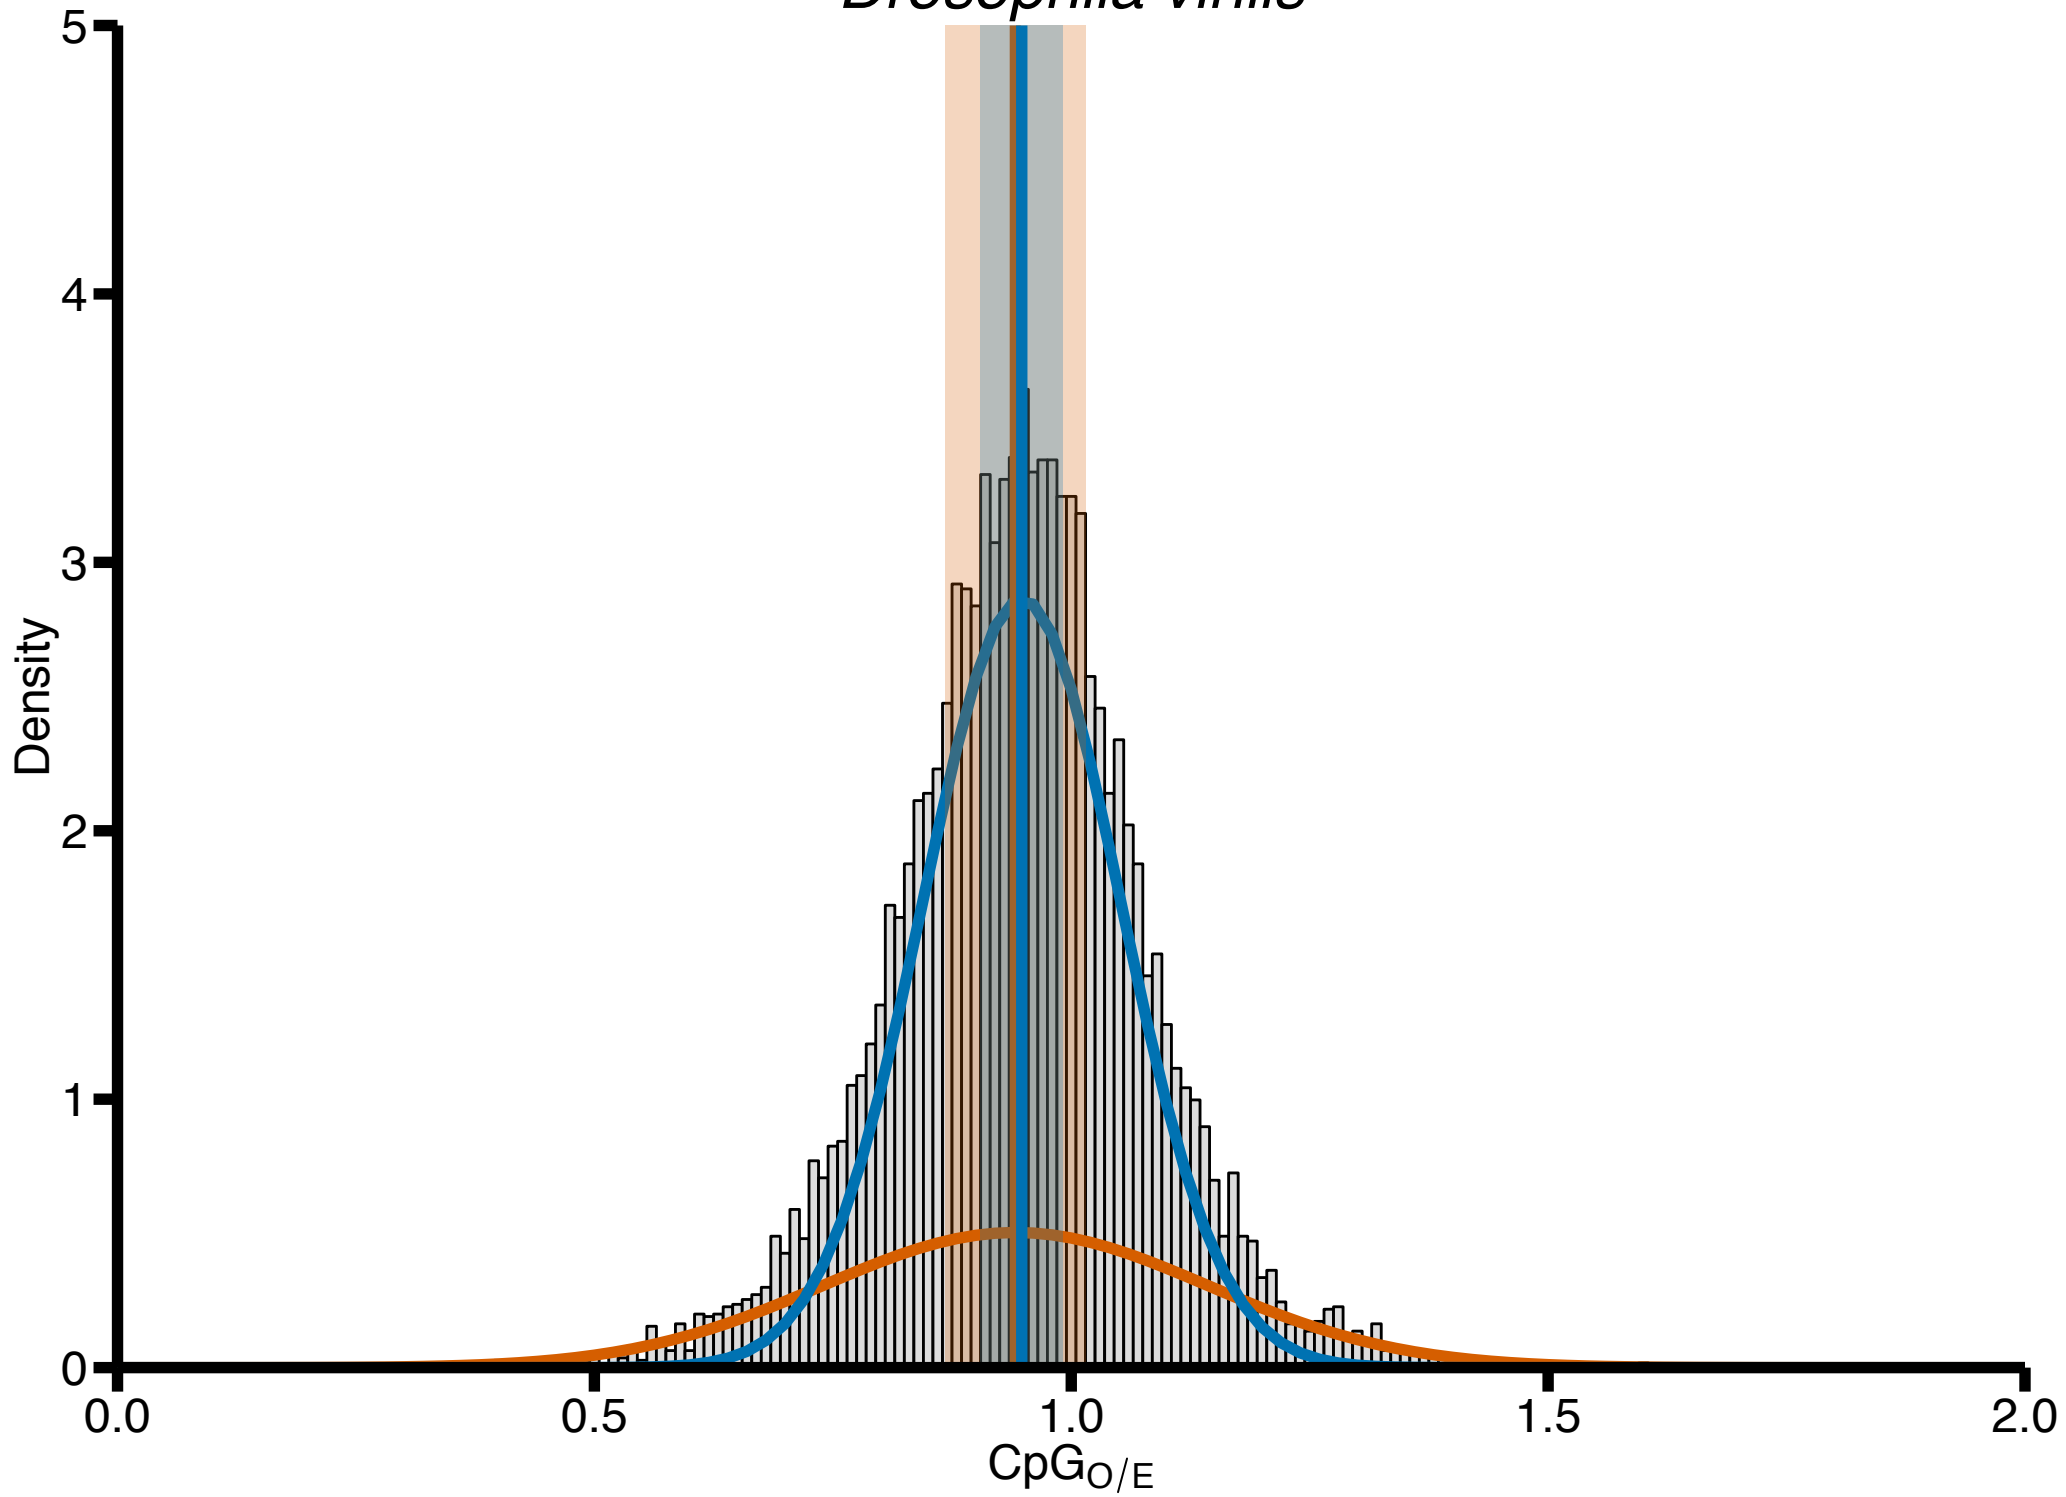

*Drosophila willistoni*

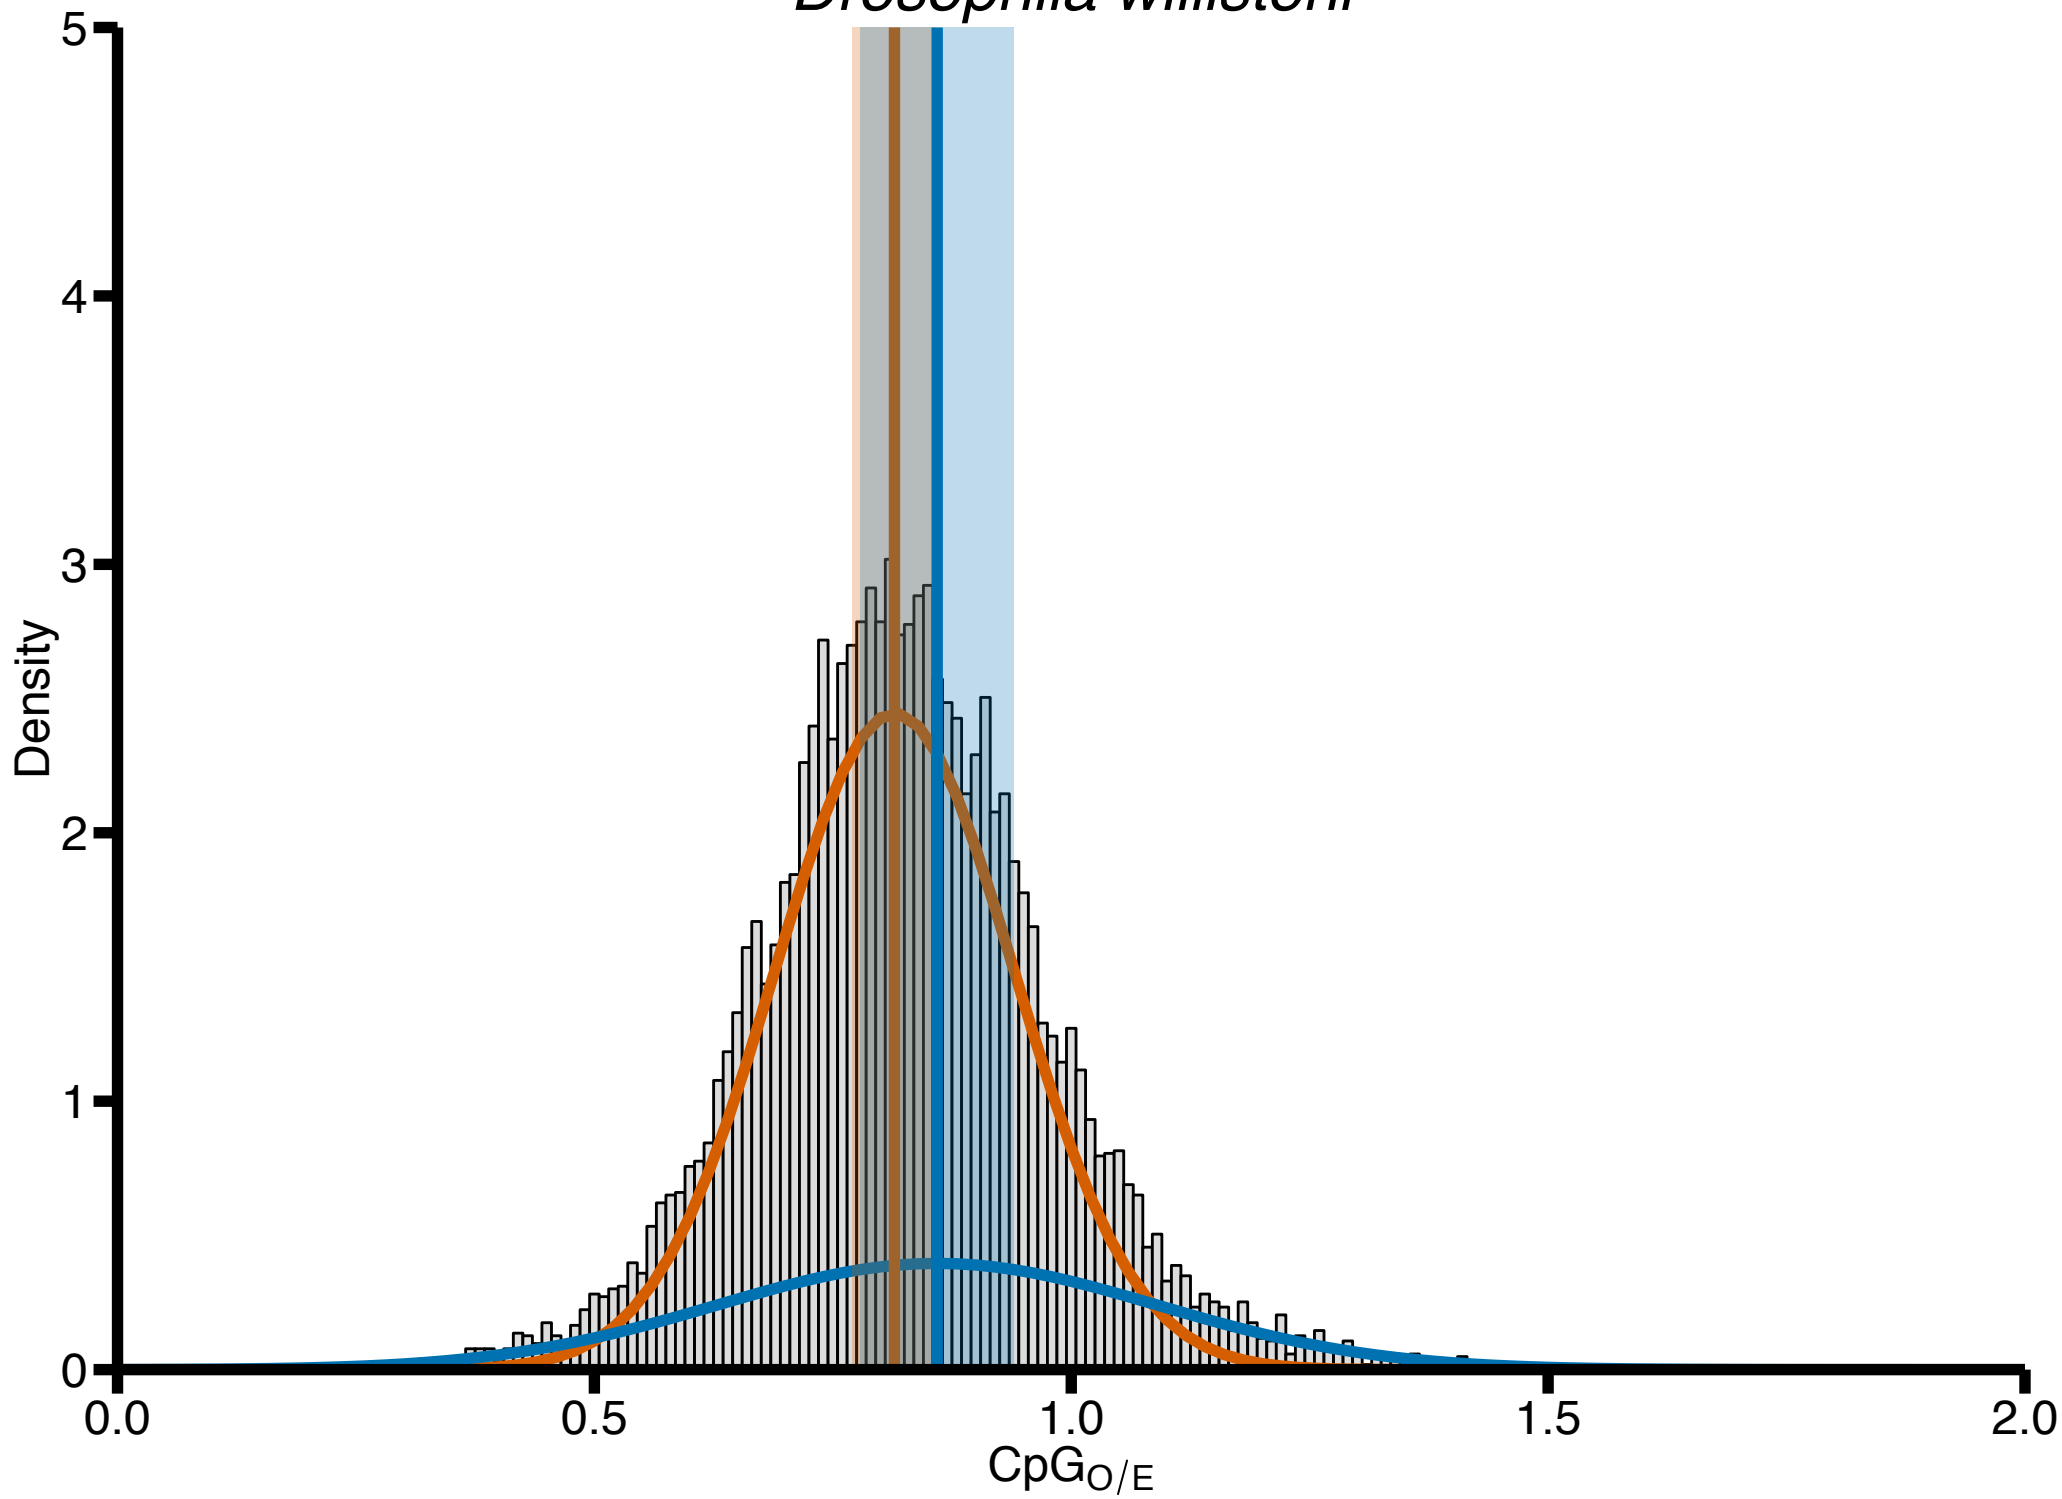

*Drosophila yakuba*

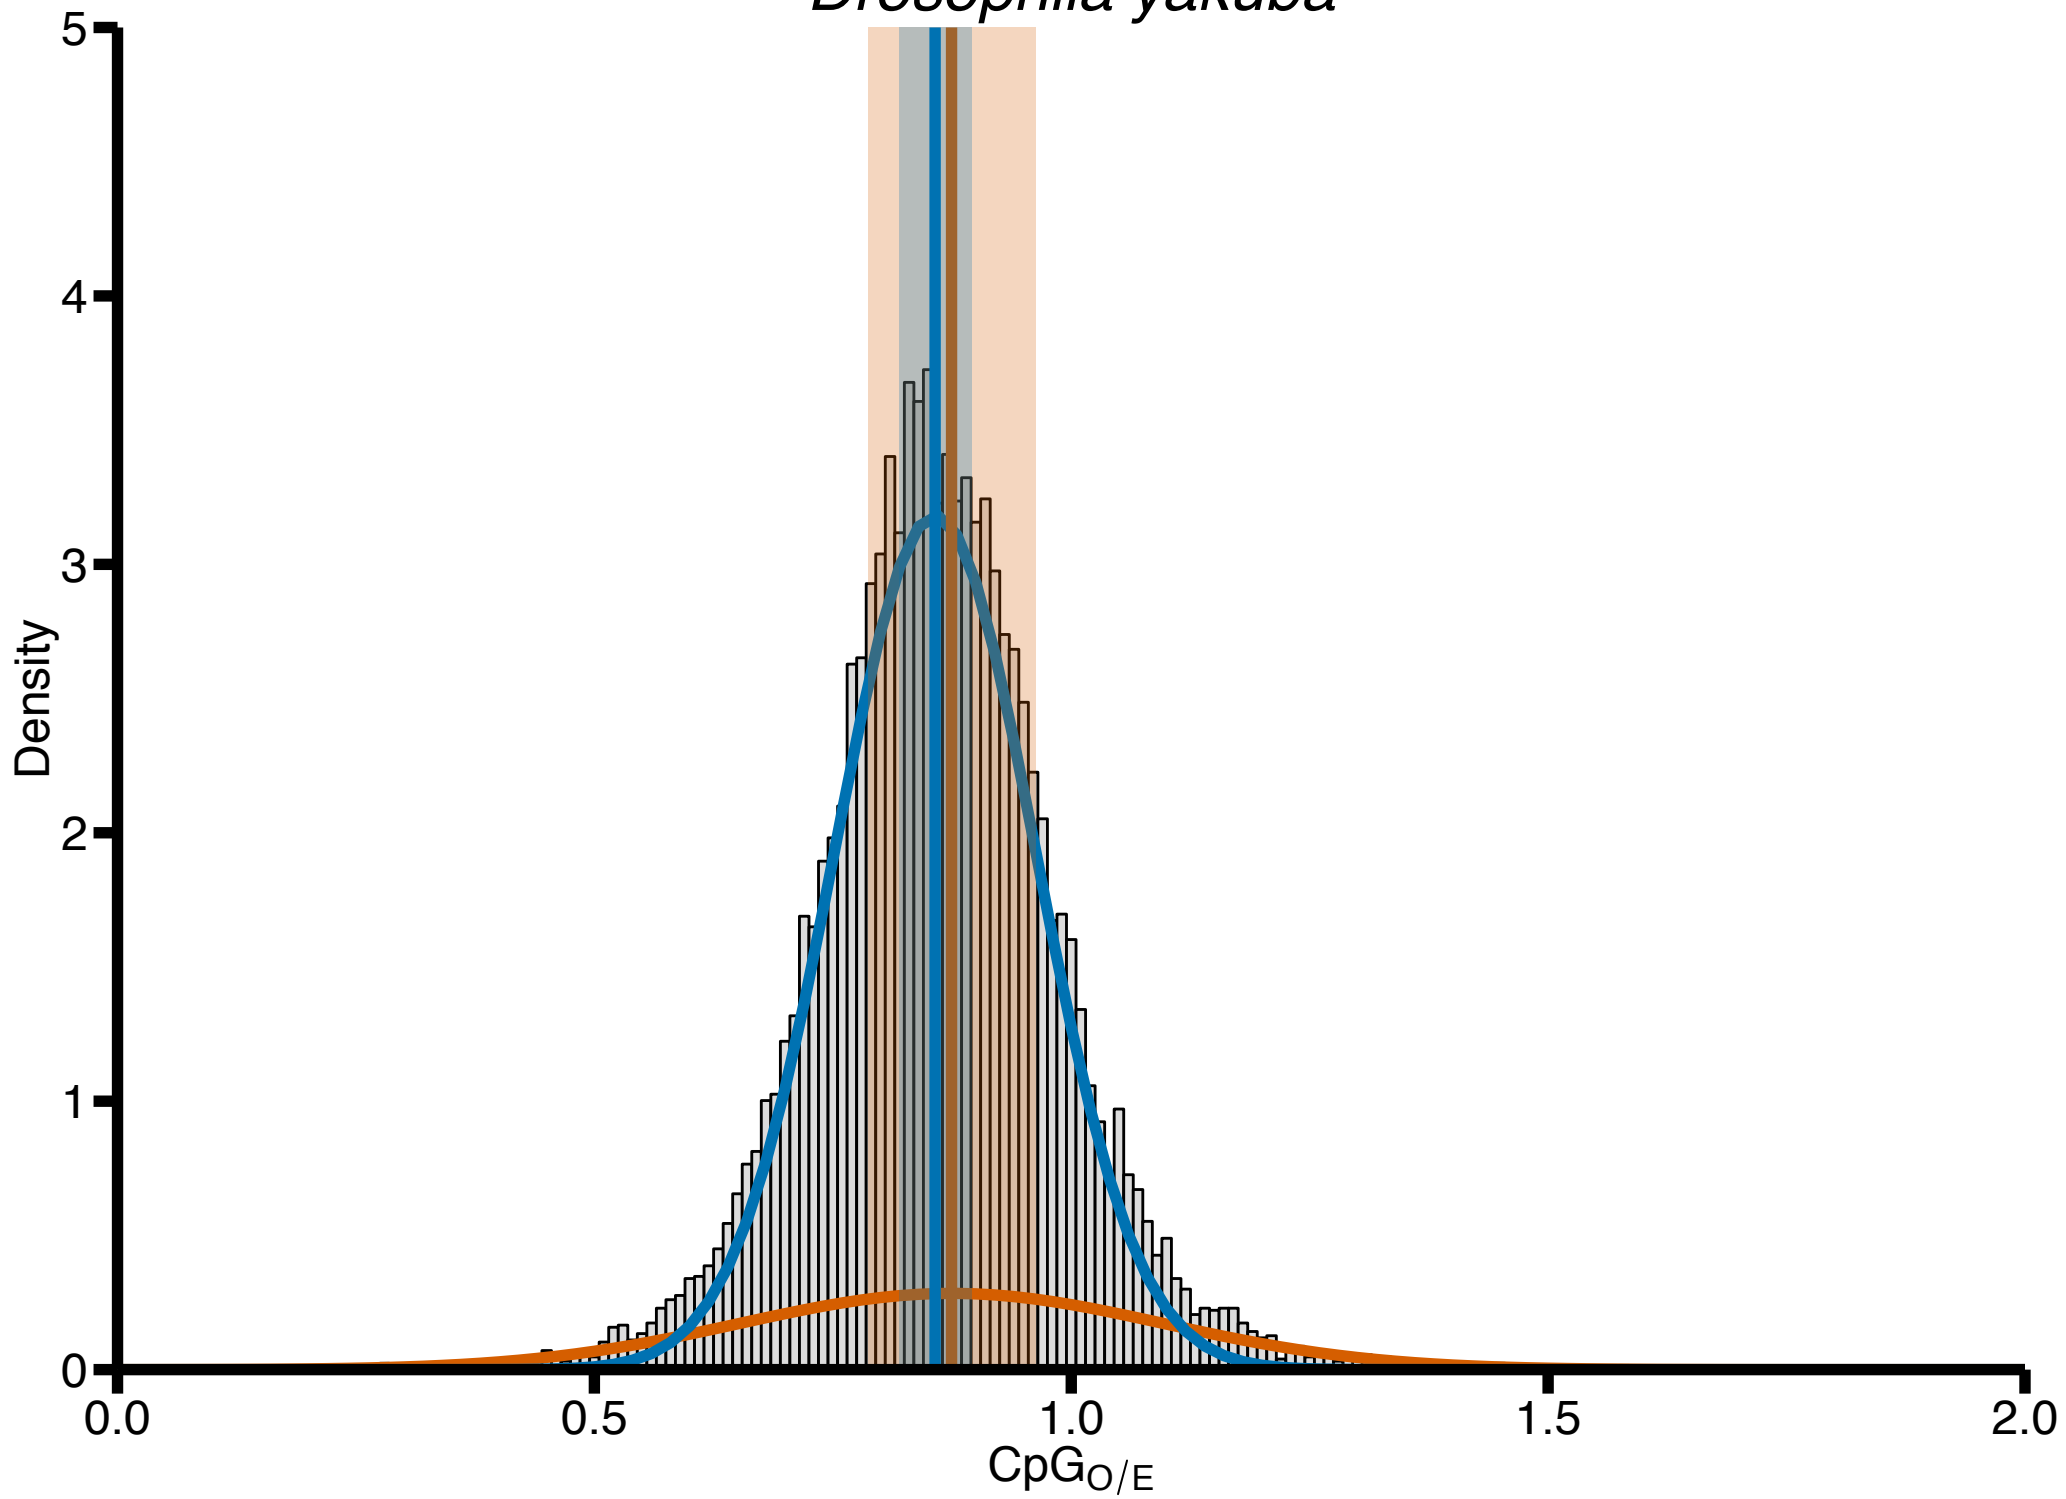



*Glossina austeni*

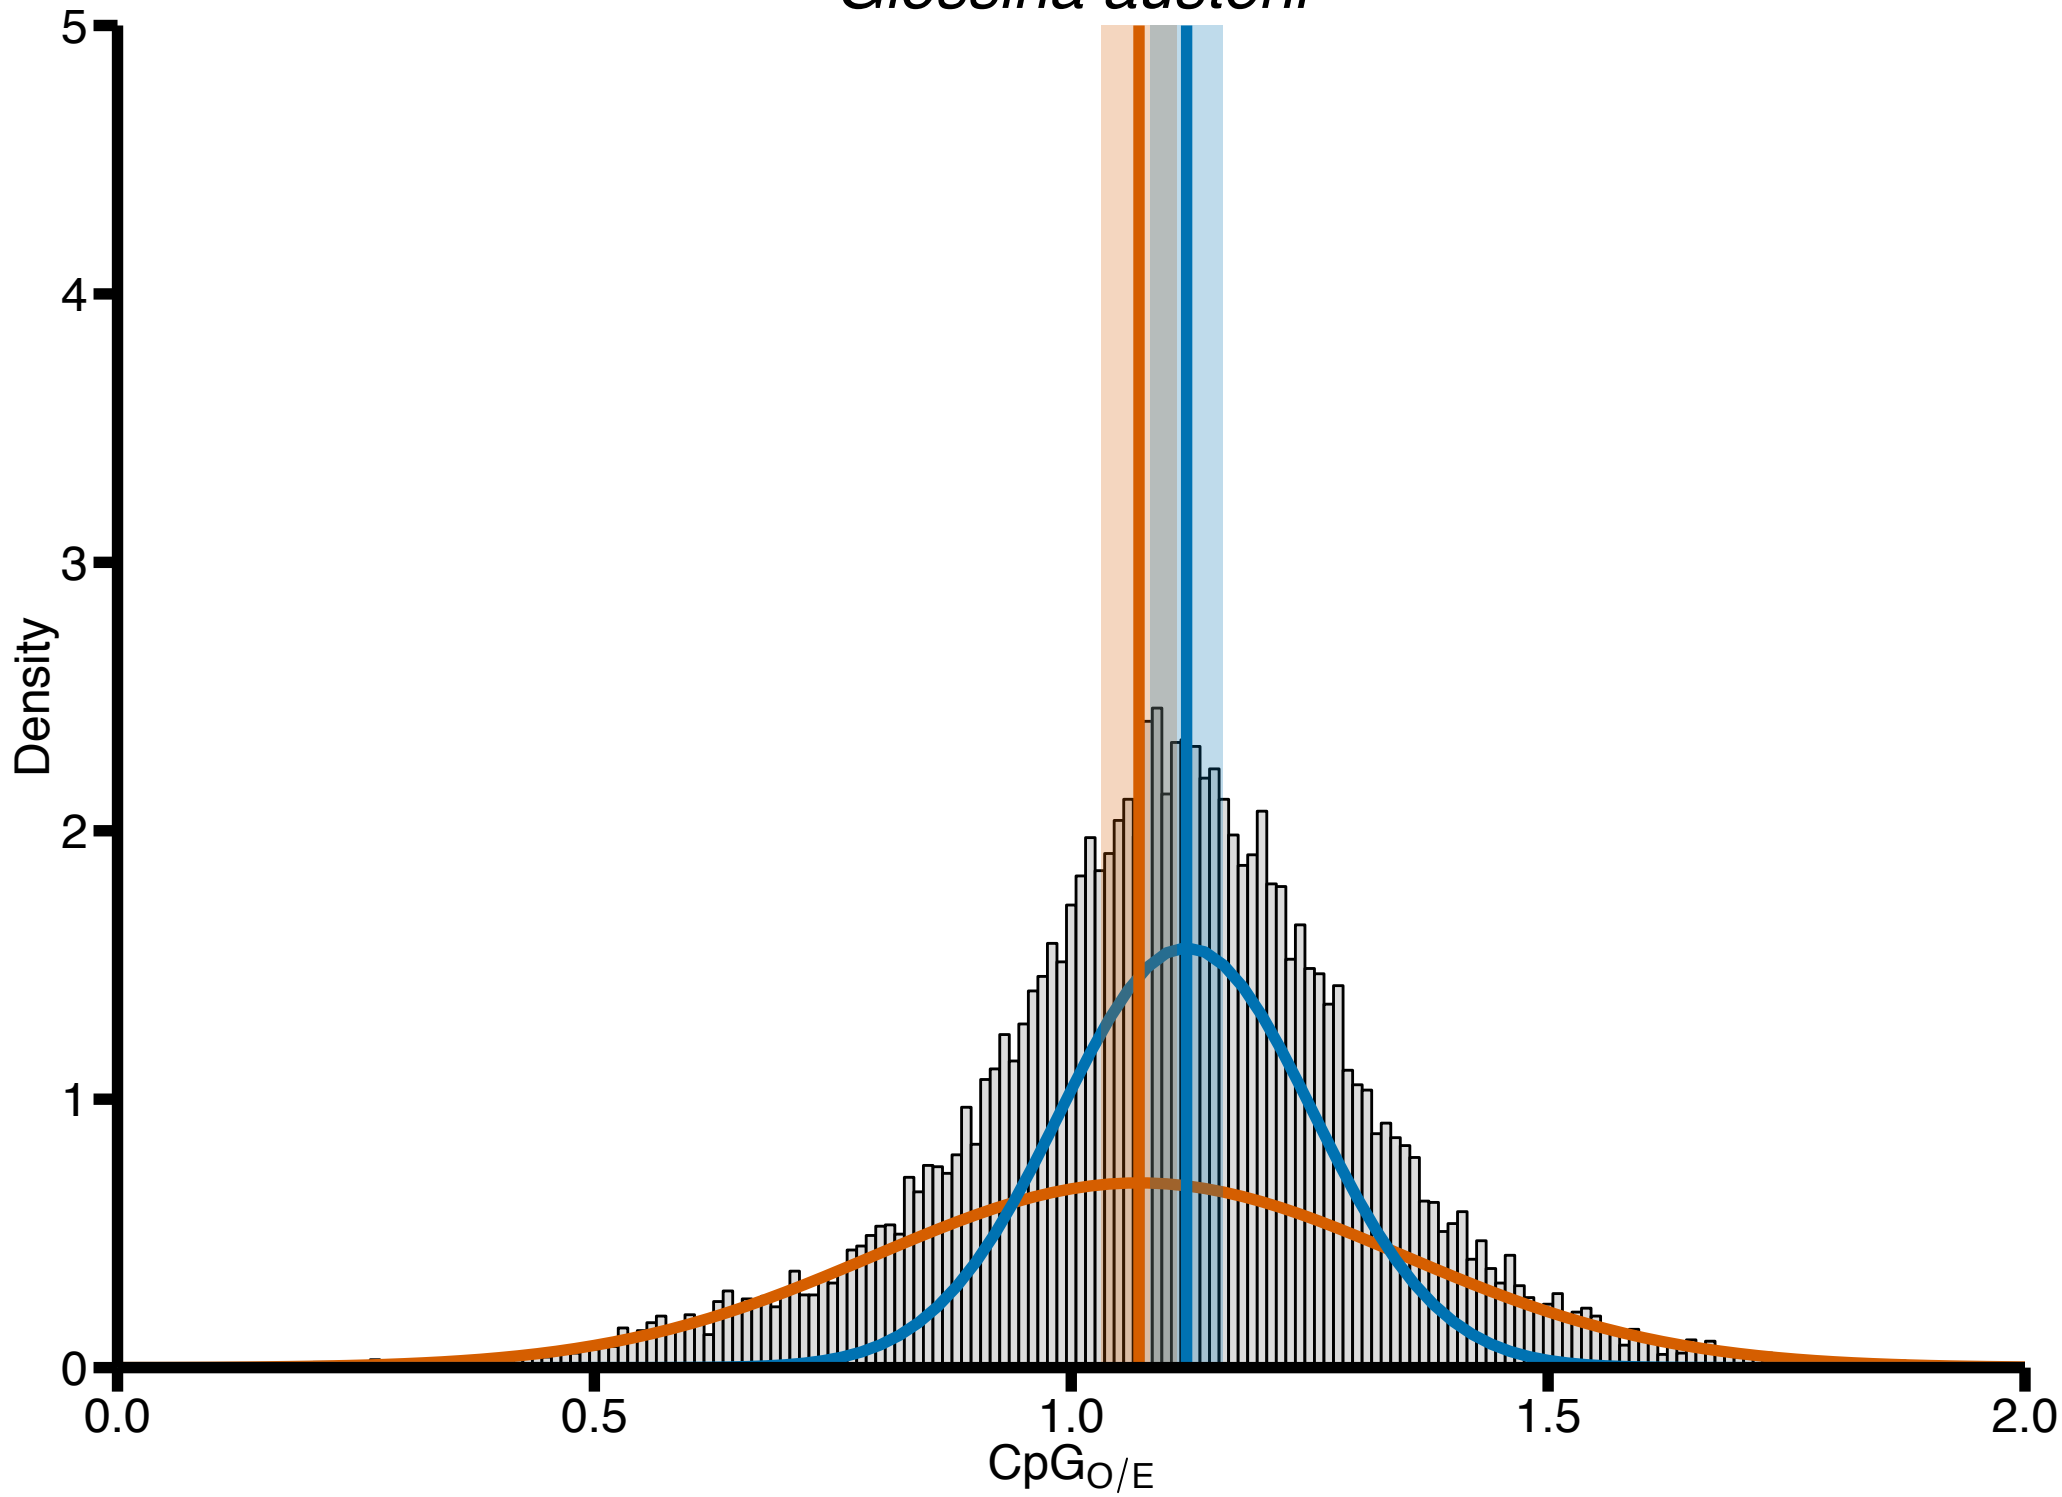

*Glossina brevipalpis*

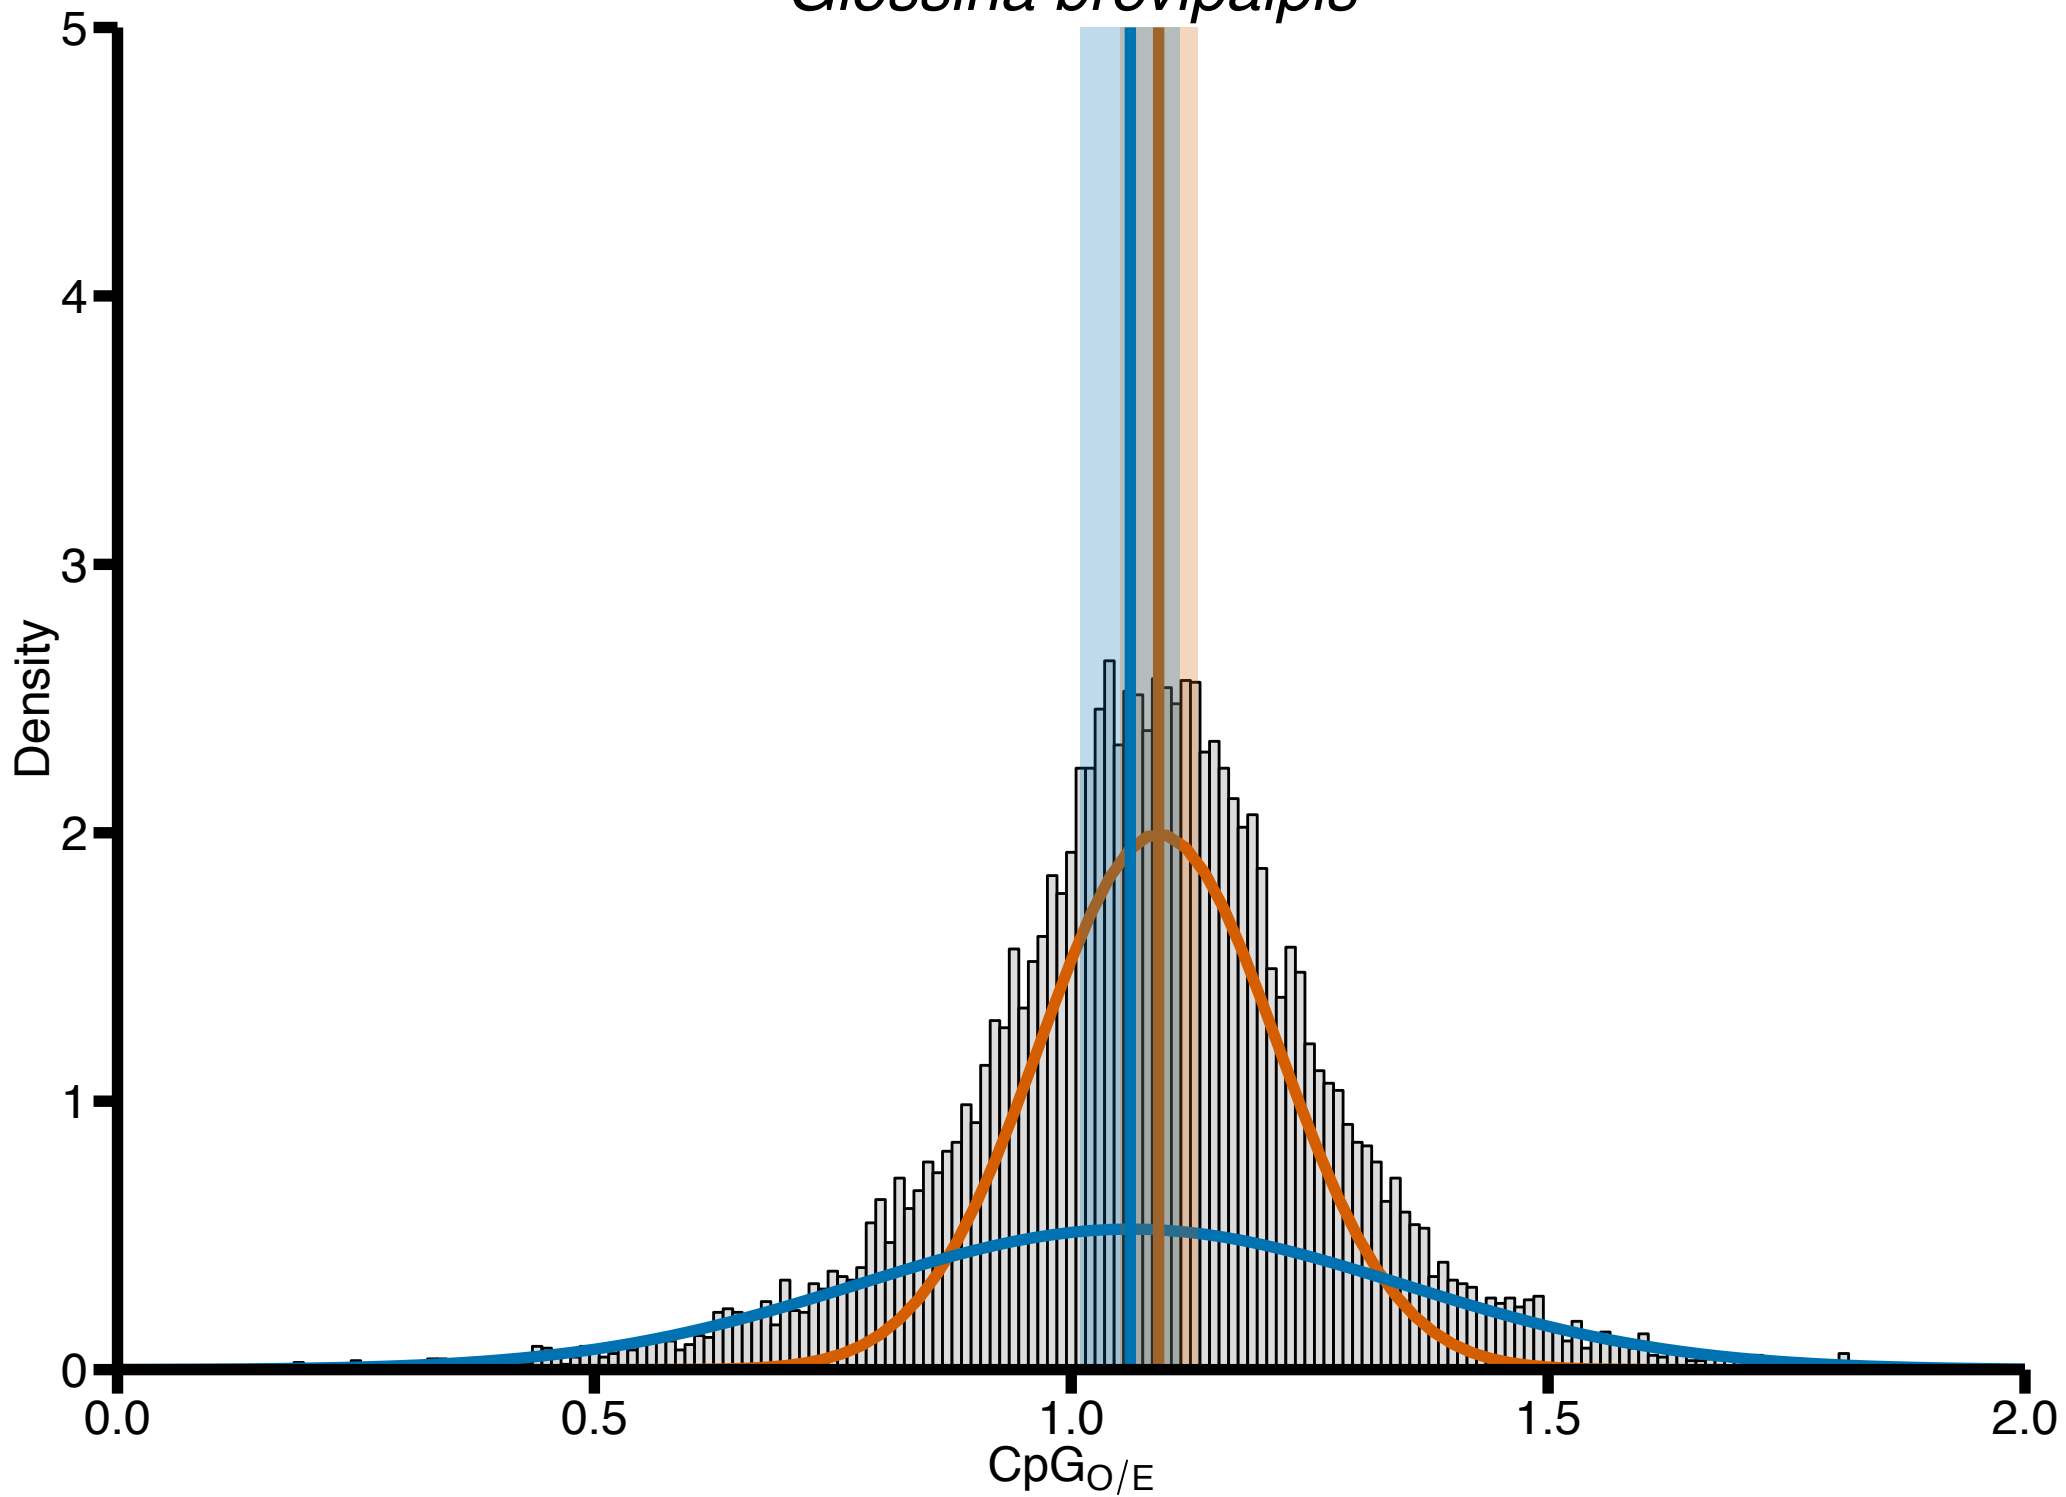

*Glossina fuscipes*

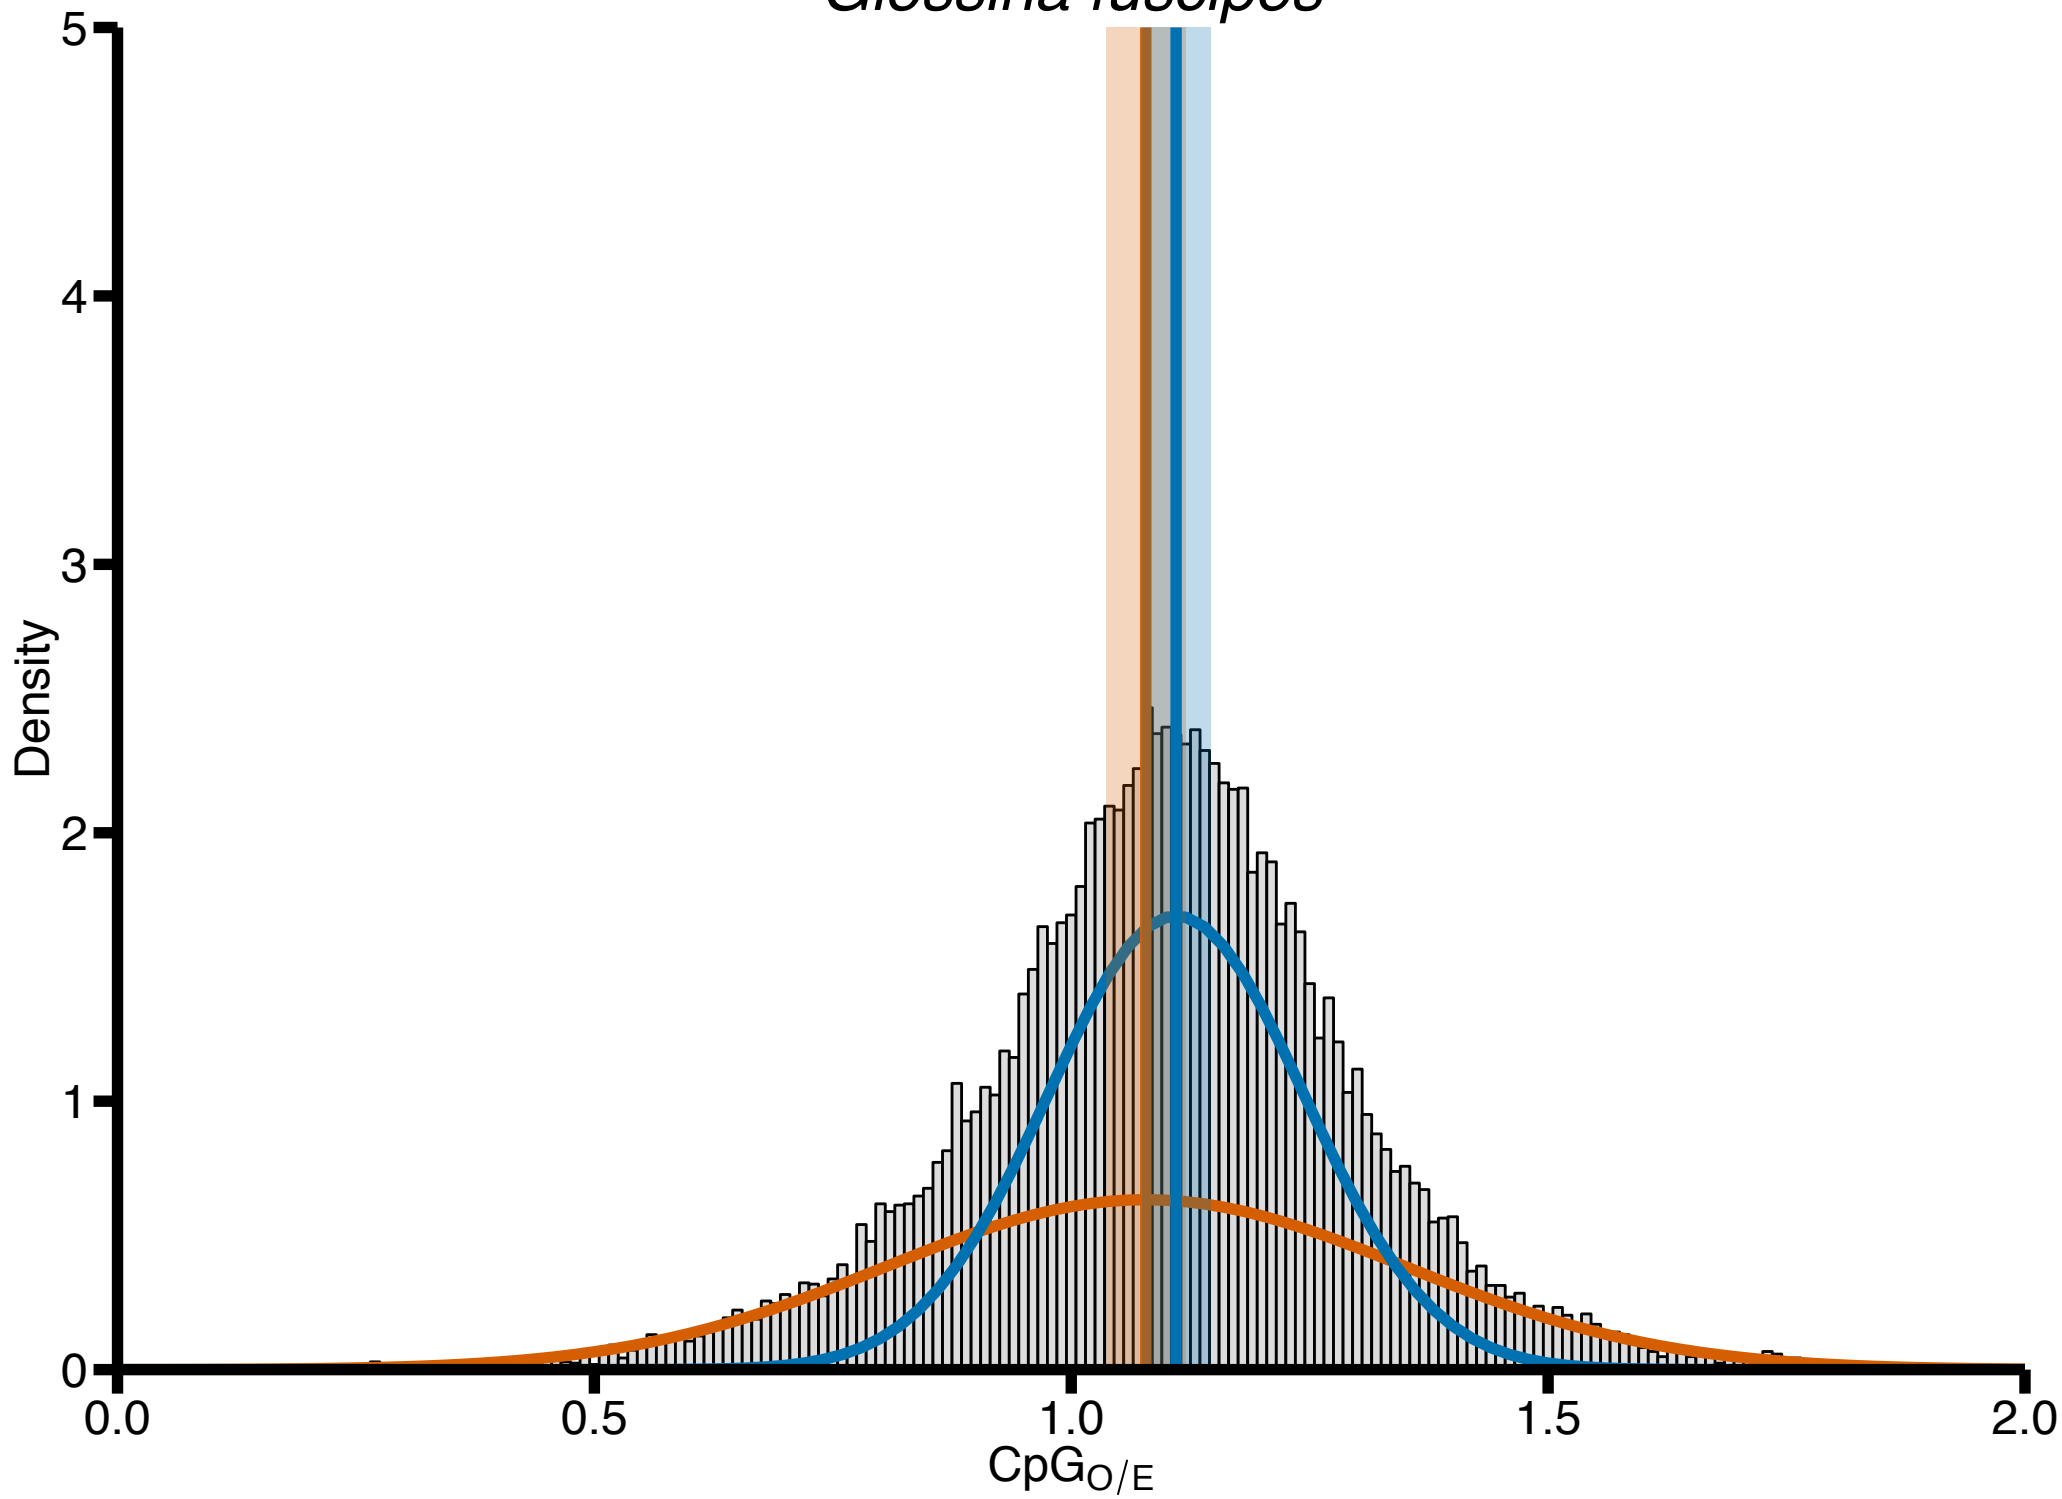

*Glossina morsitans*

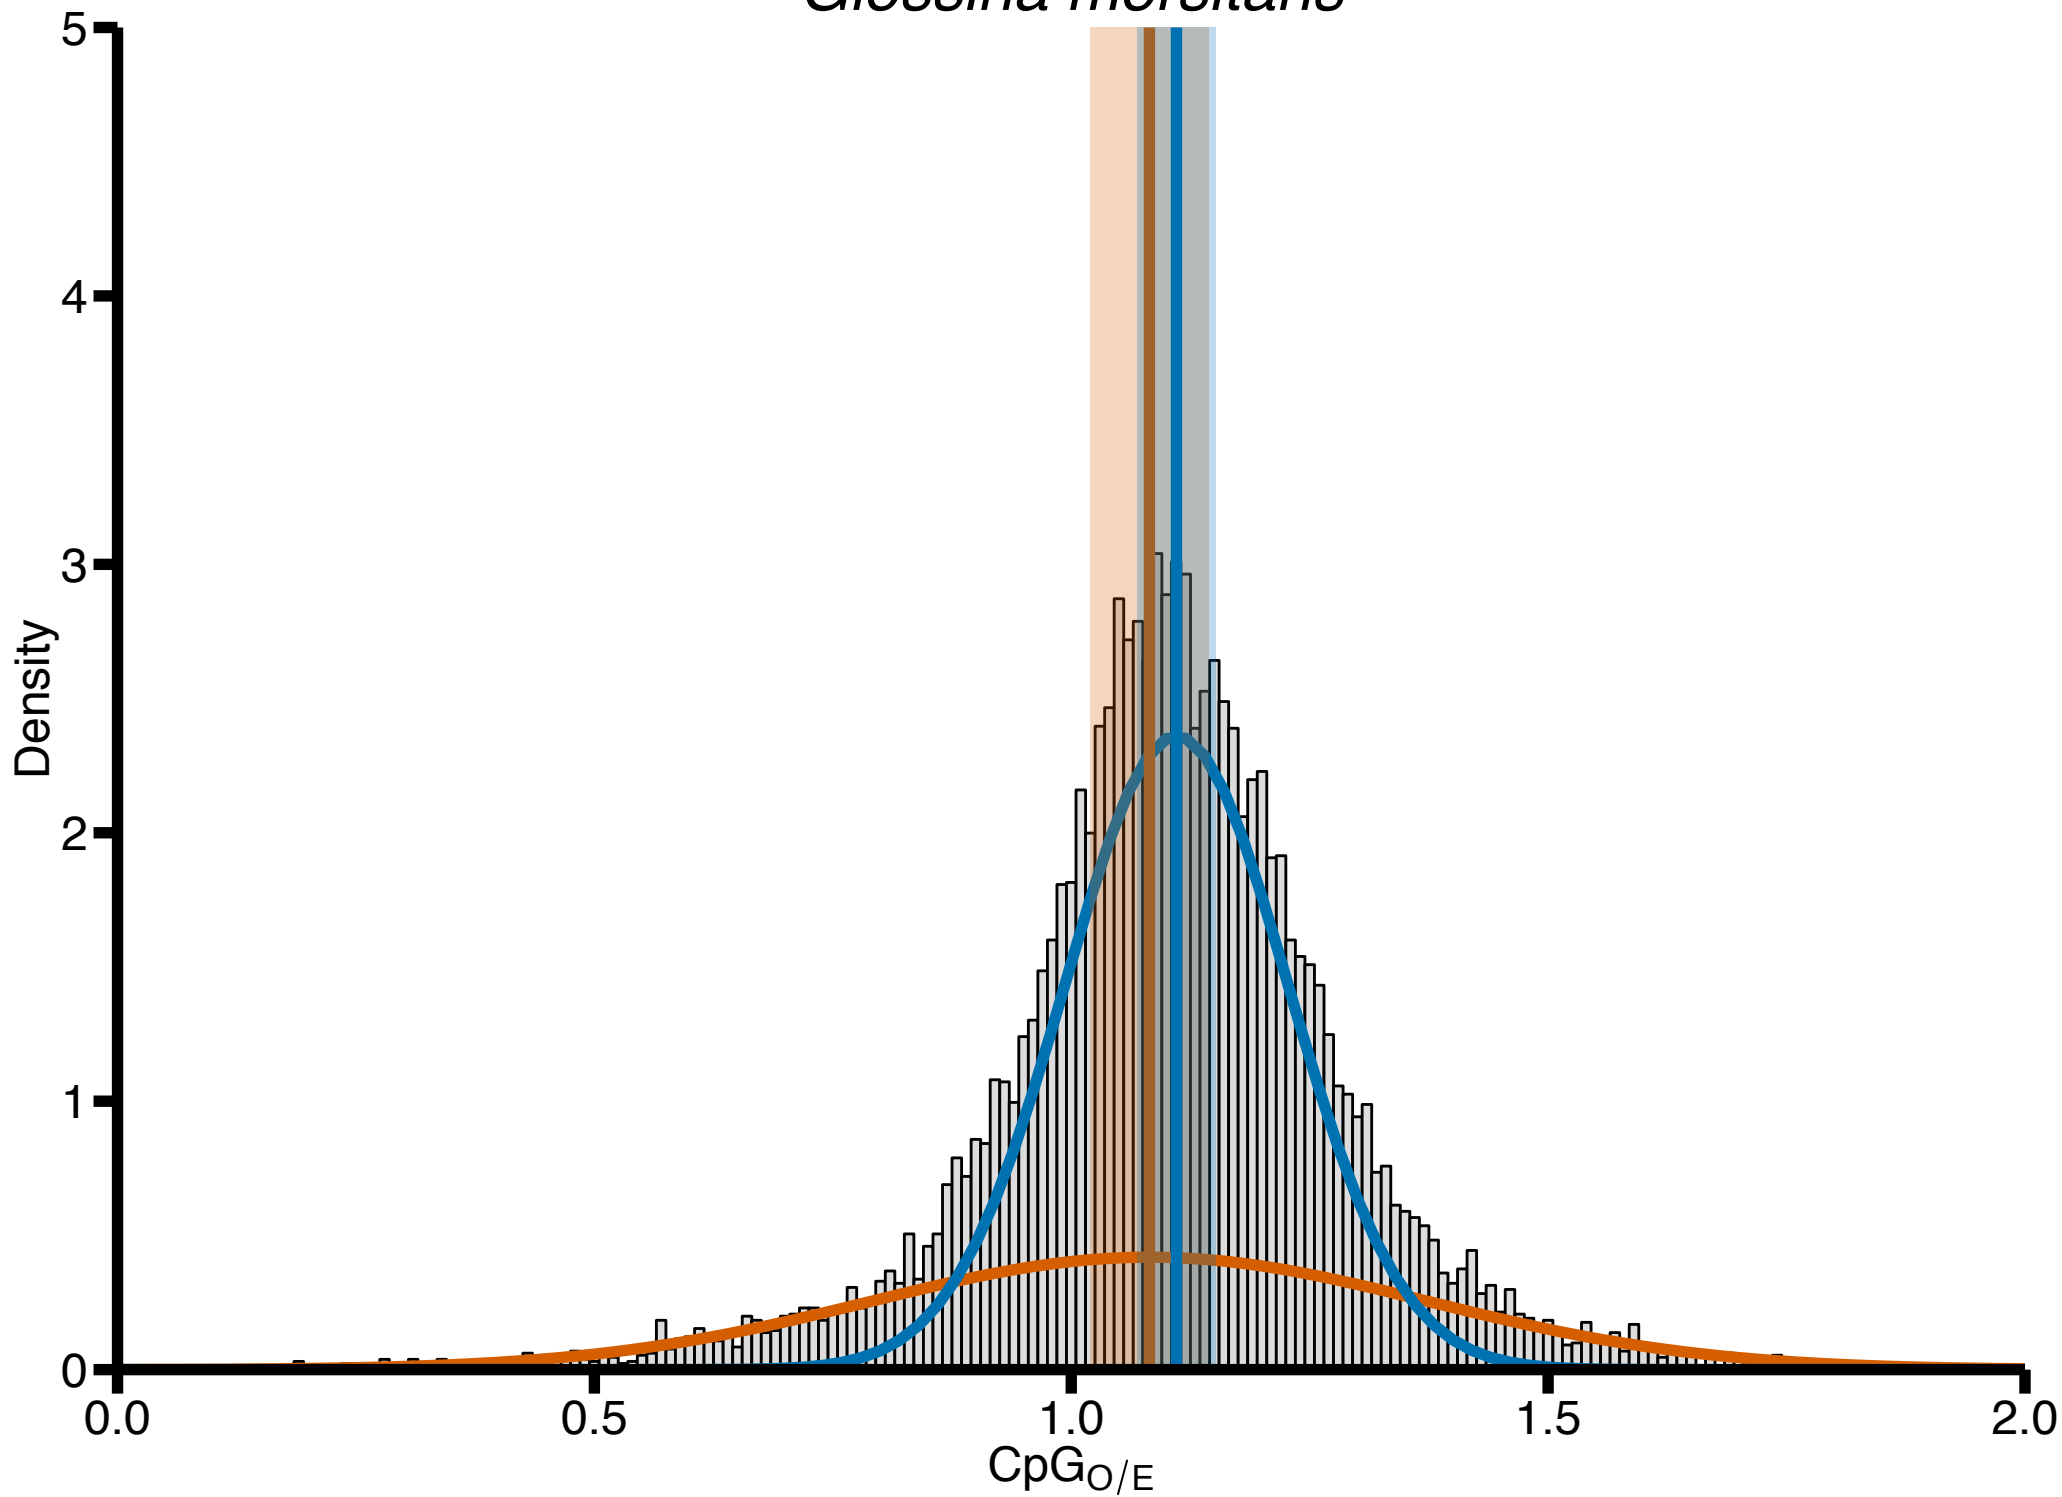

*Glossina pallidipes*

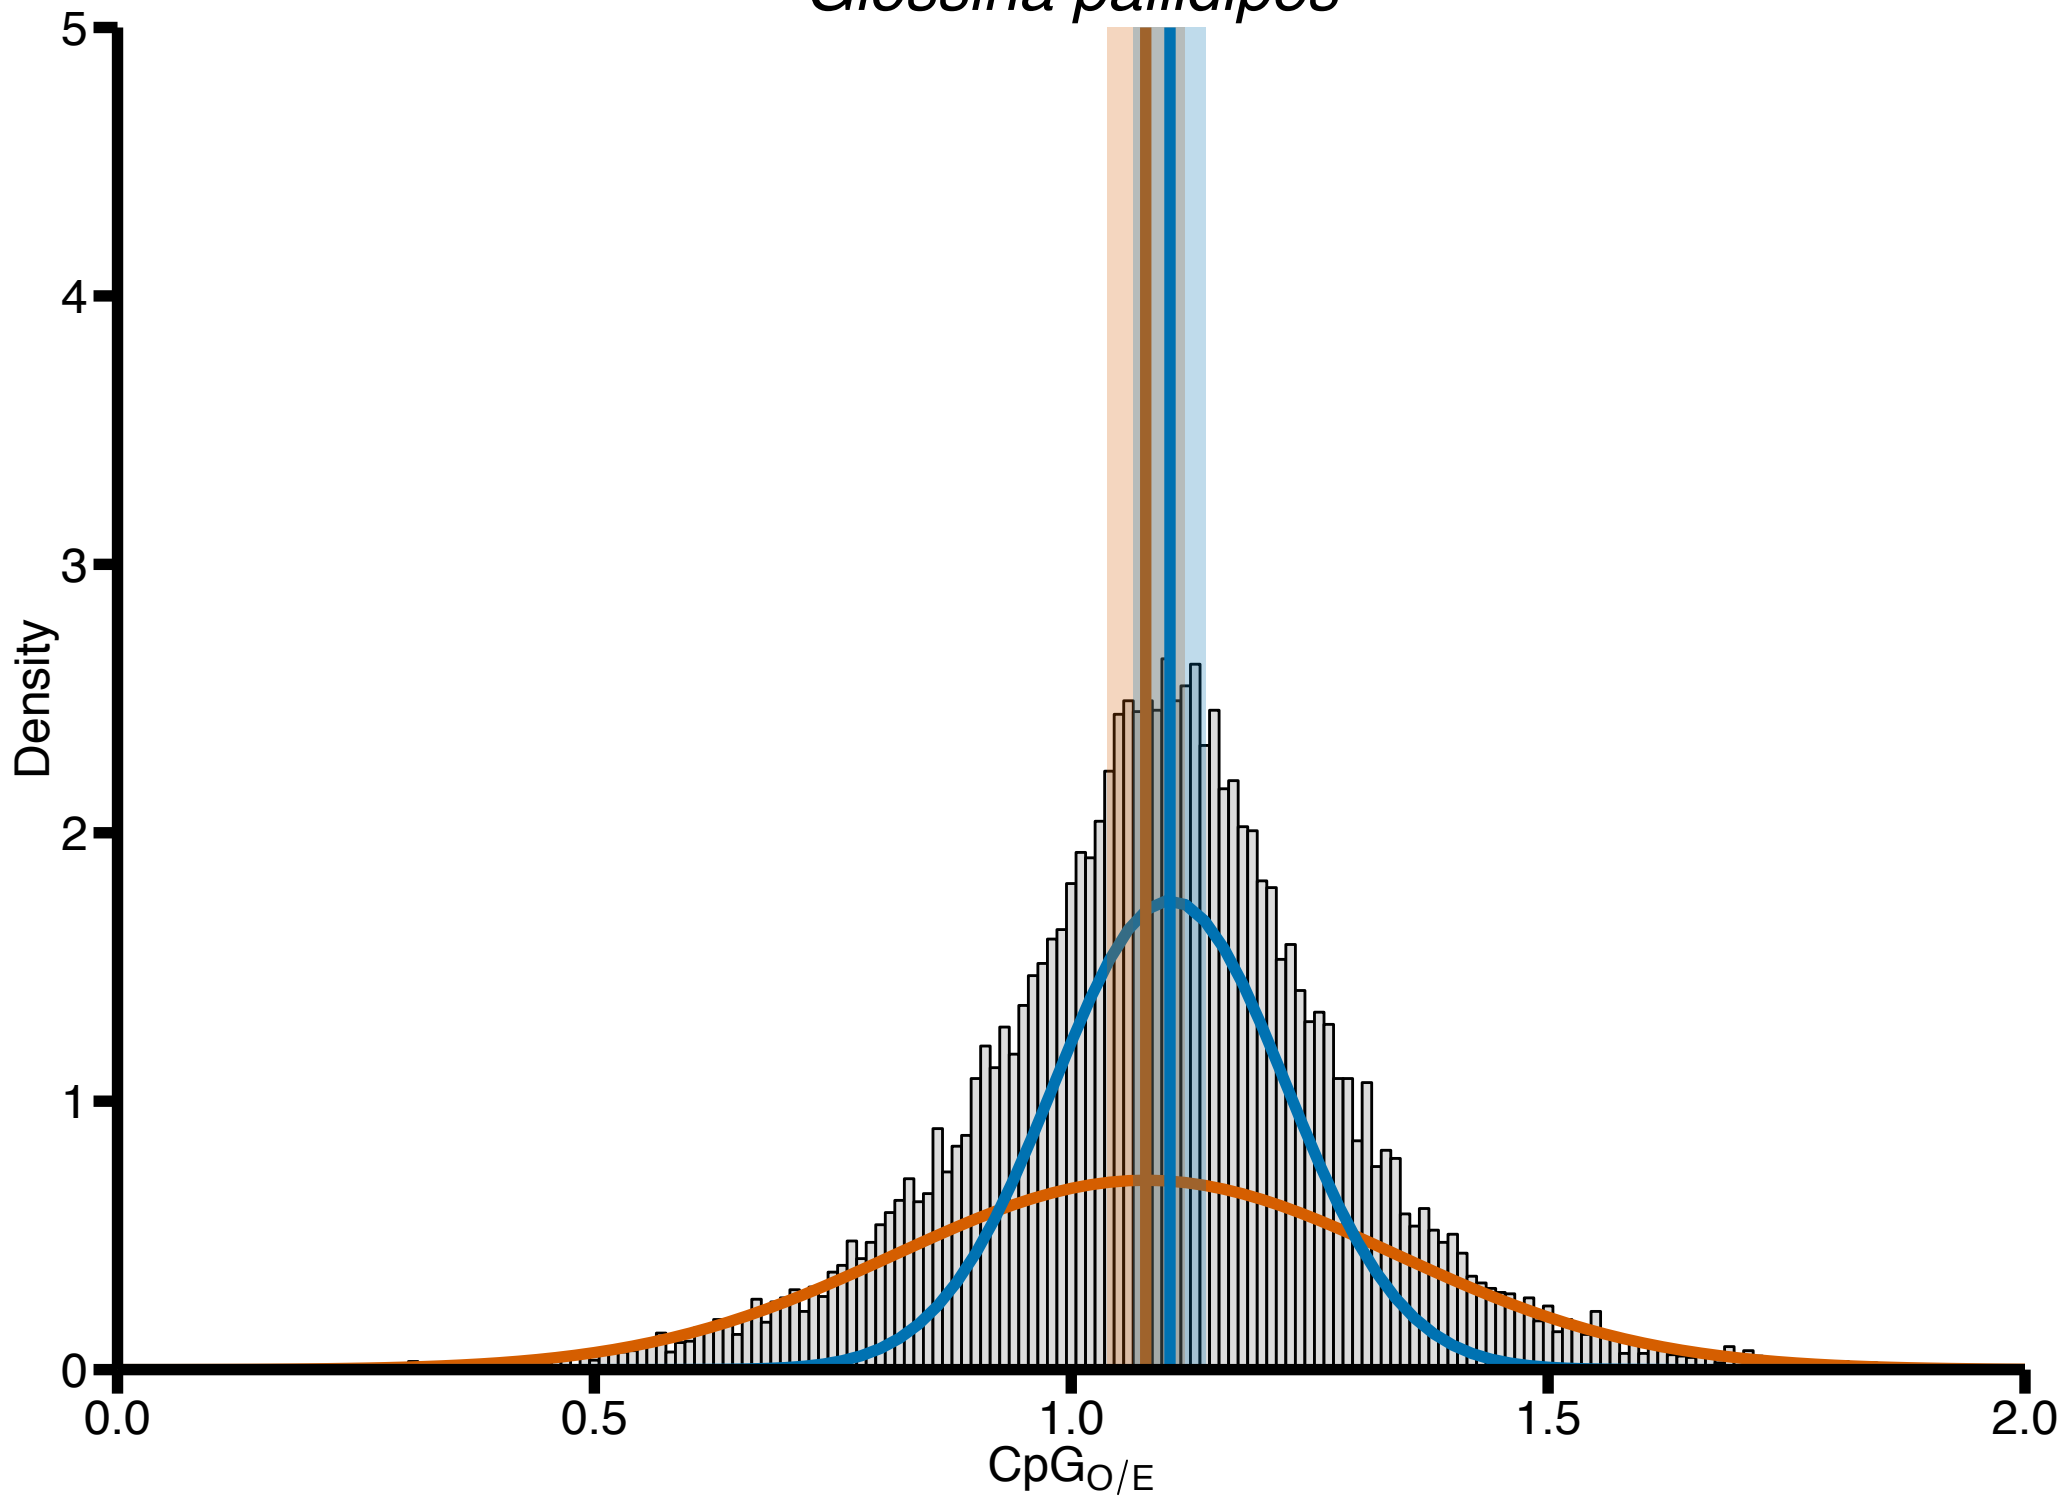

*Glossina palpalis*

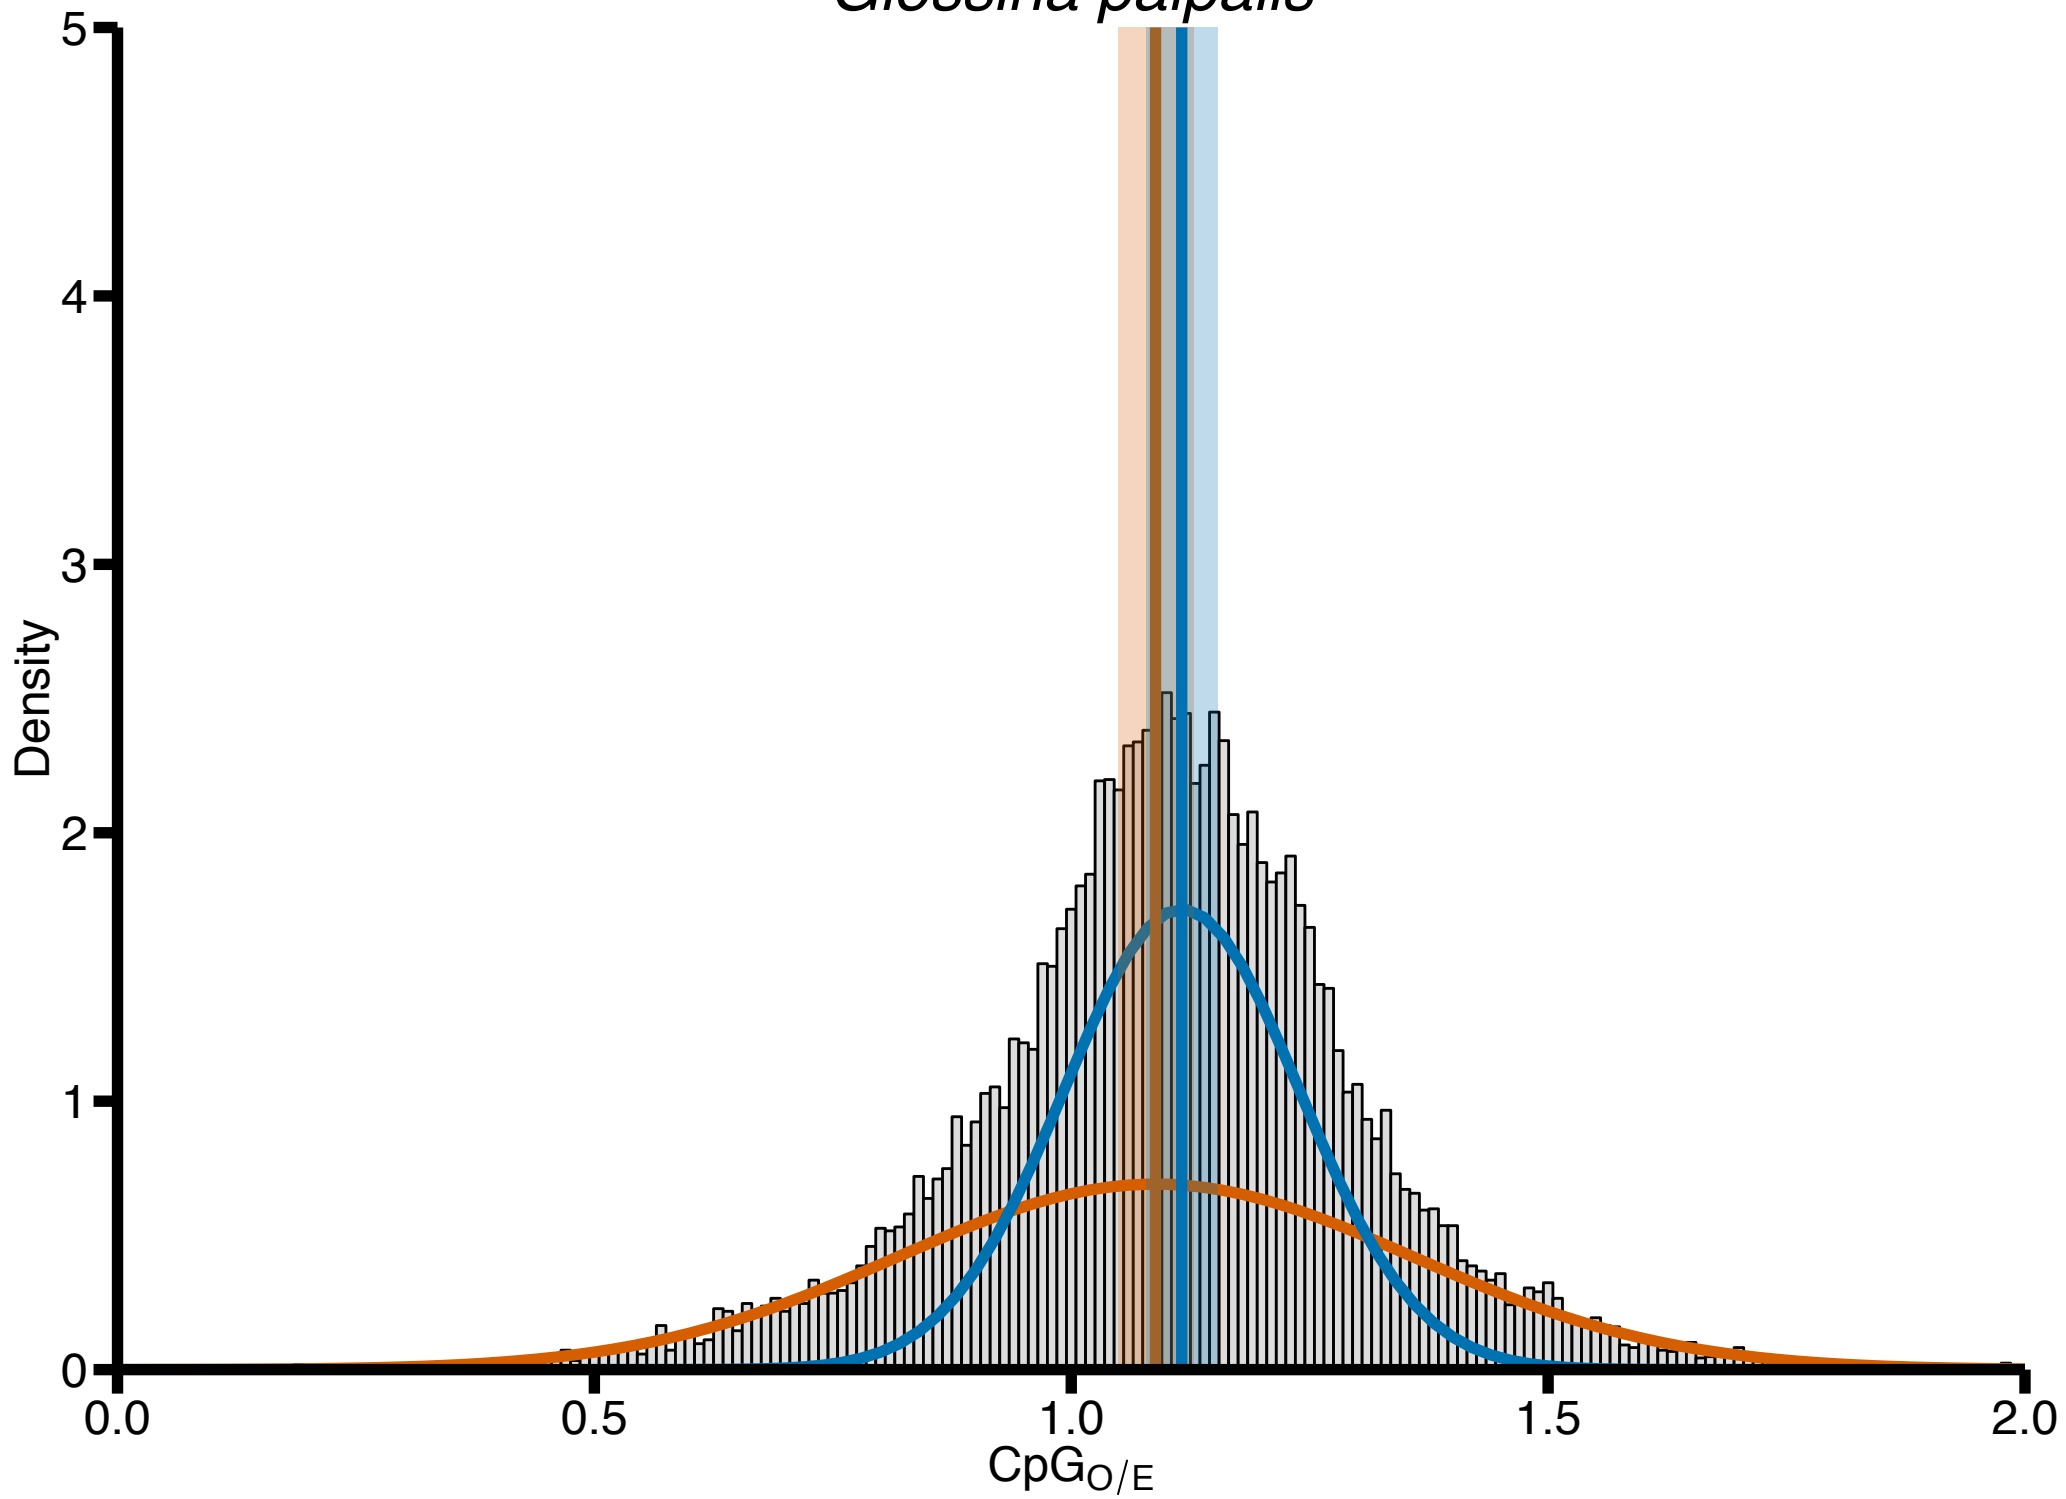

*Lucilia cuprina*

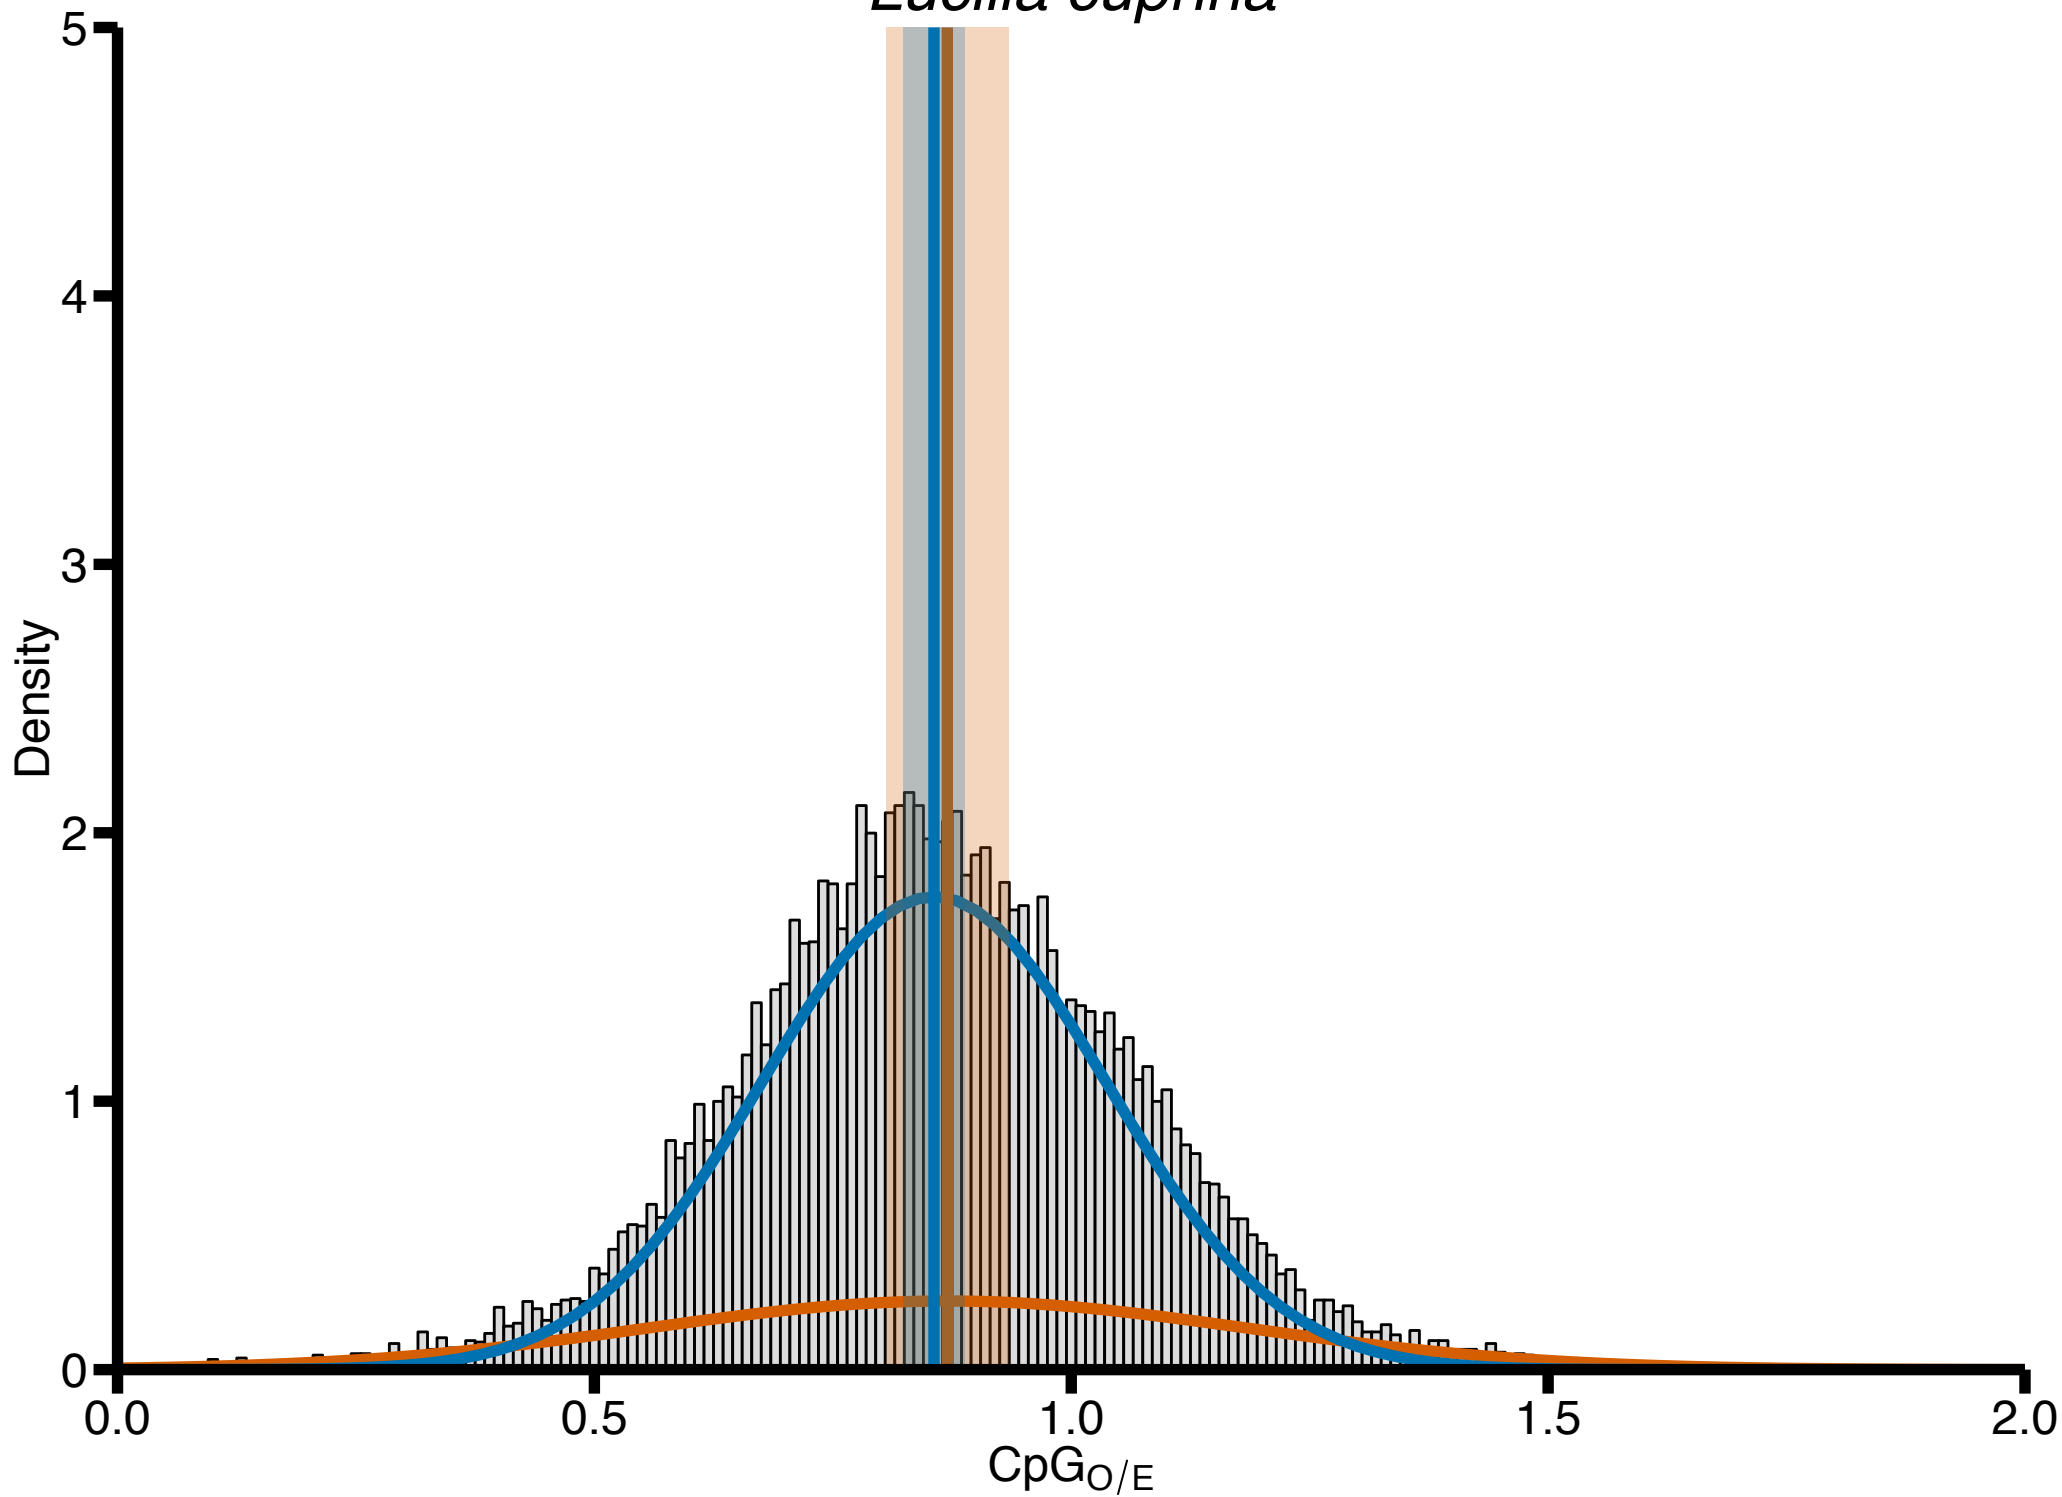

*Lutzomyia longipalpis*

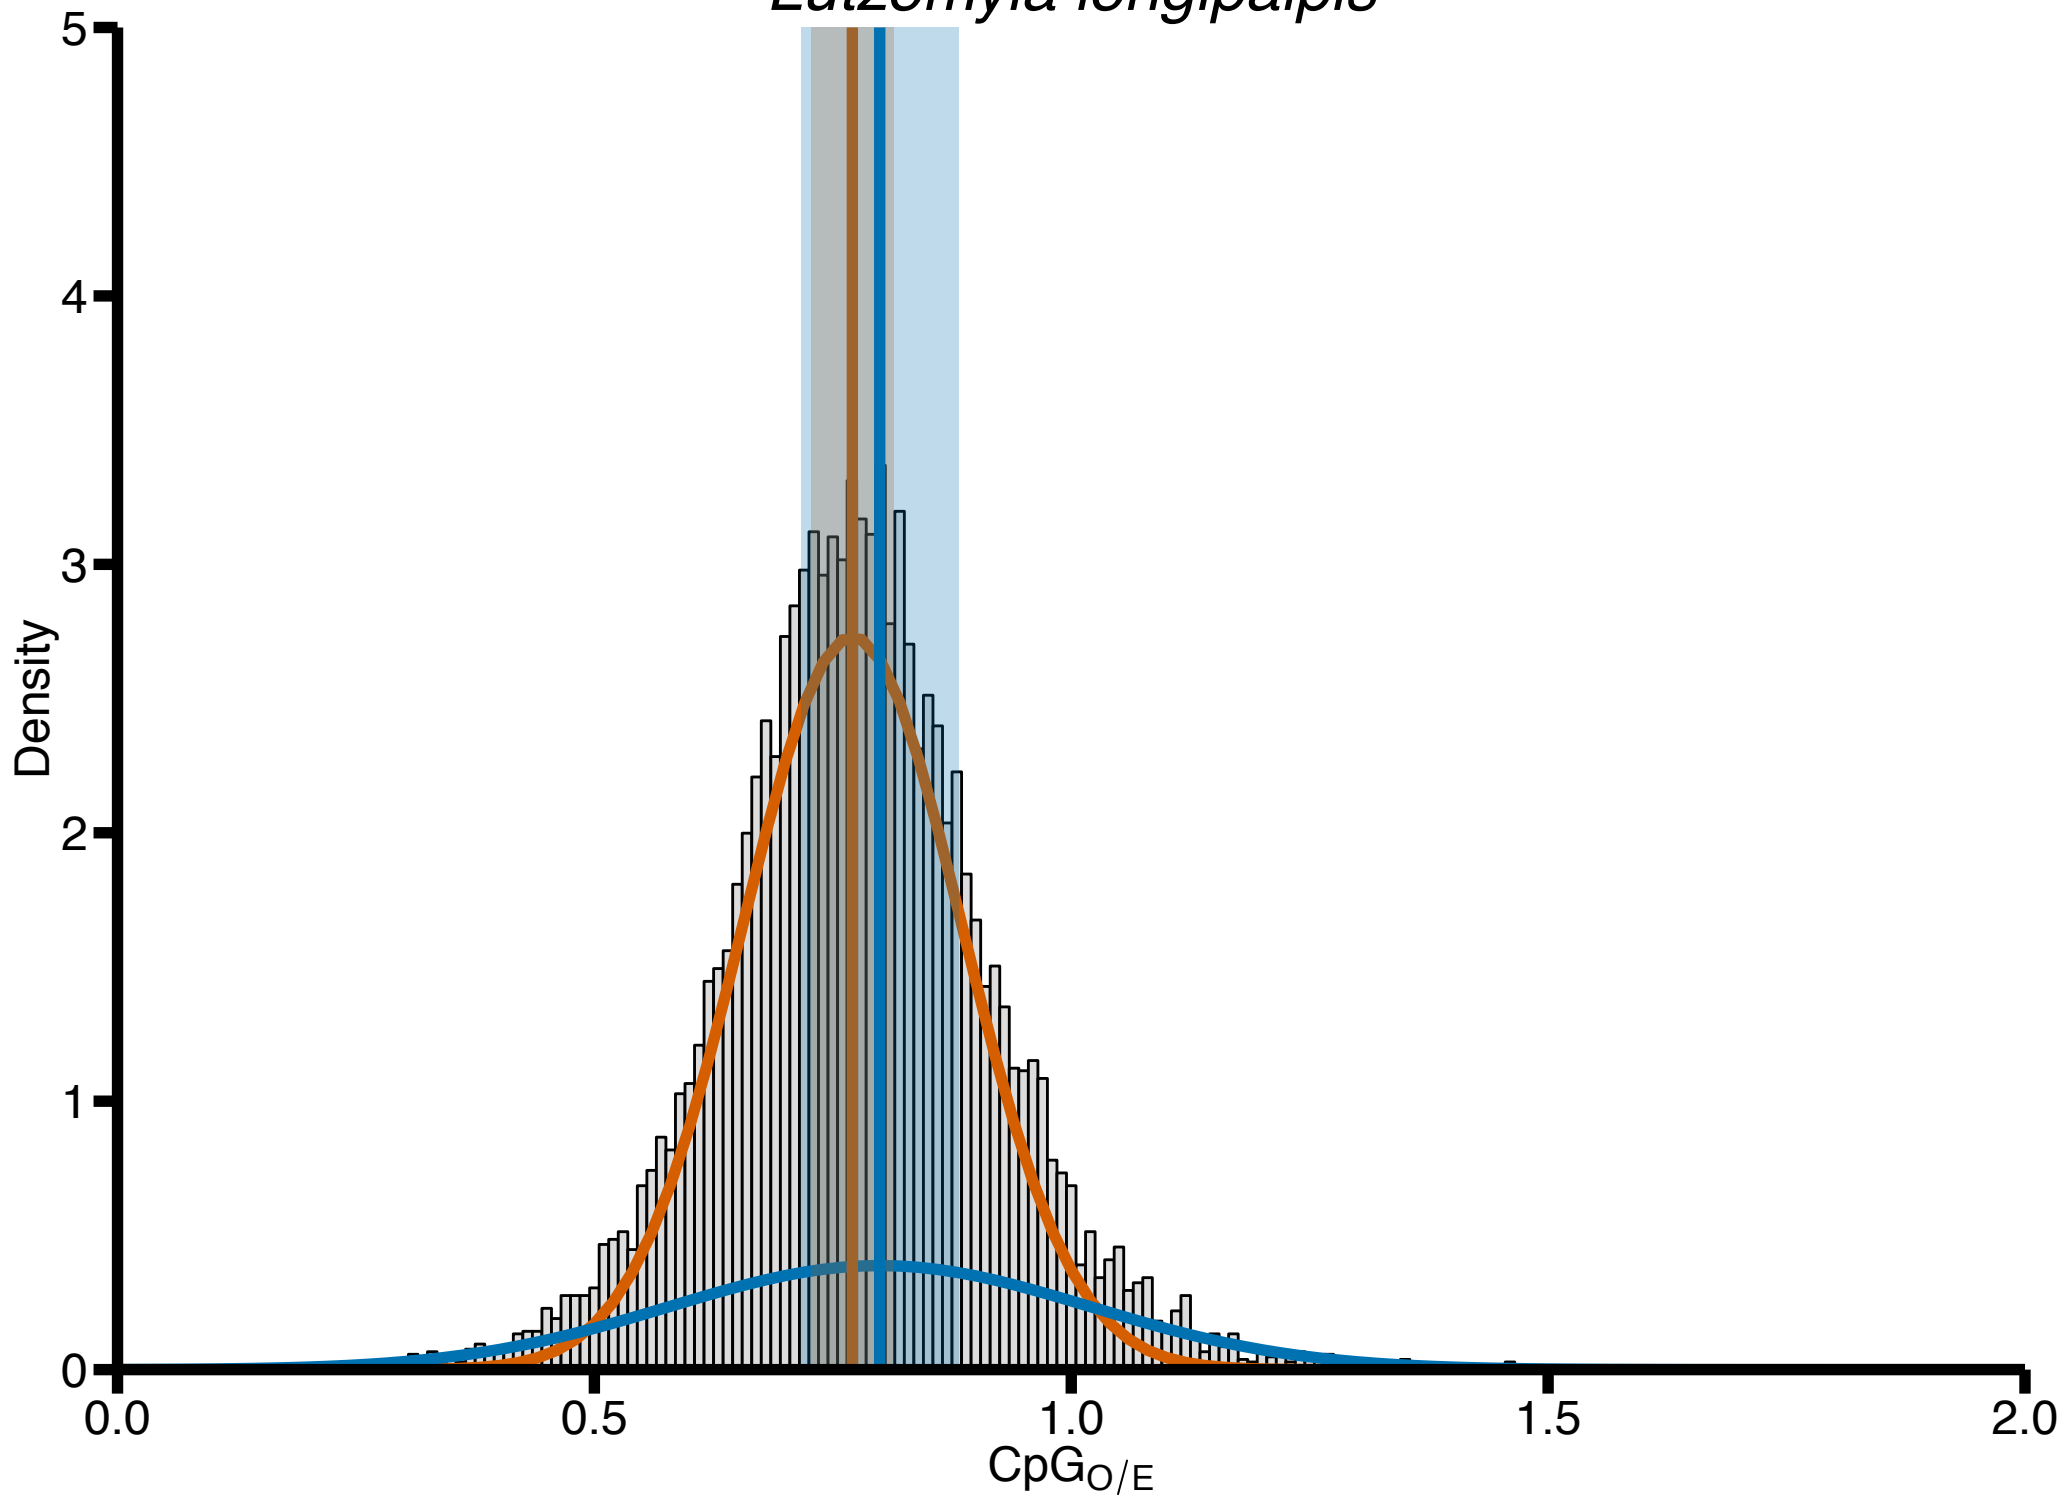



*Musca domestica*

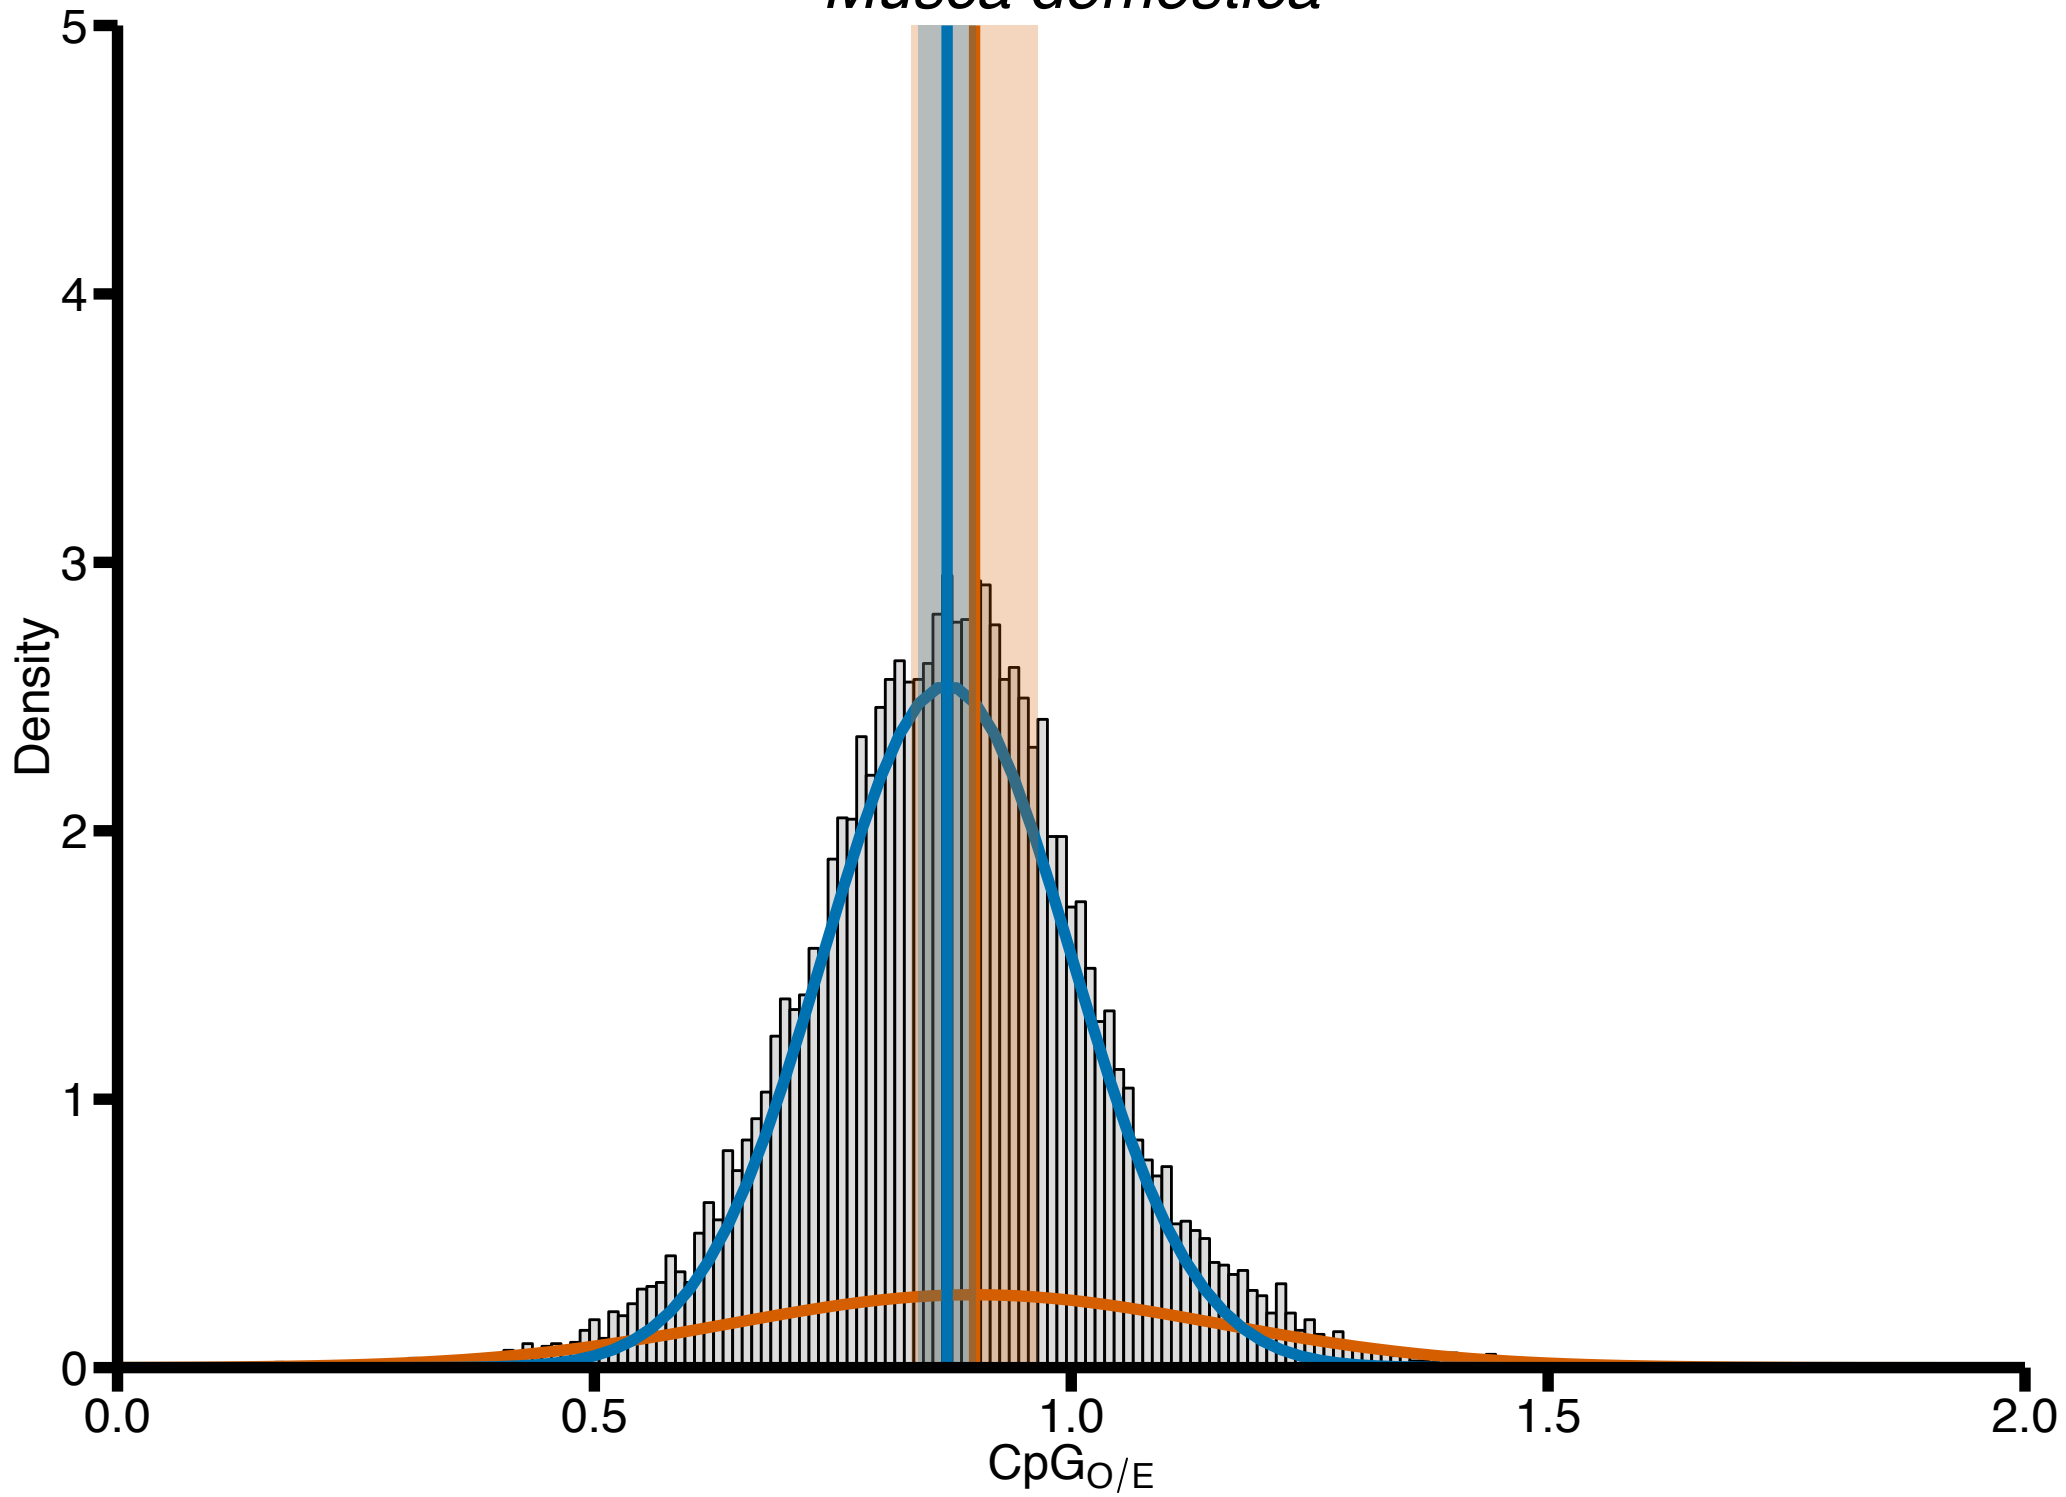

*Phlebotomus papatasi*

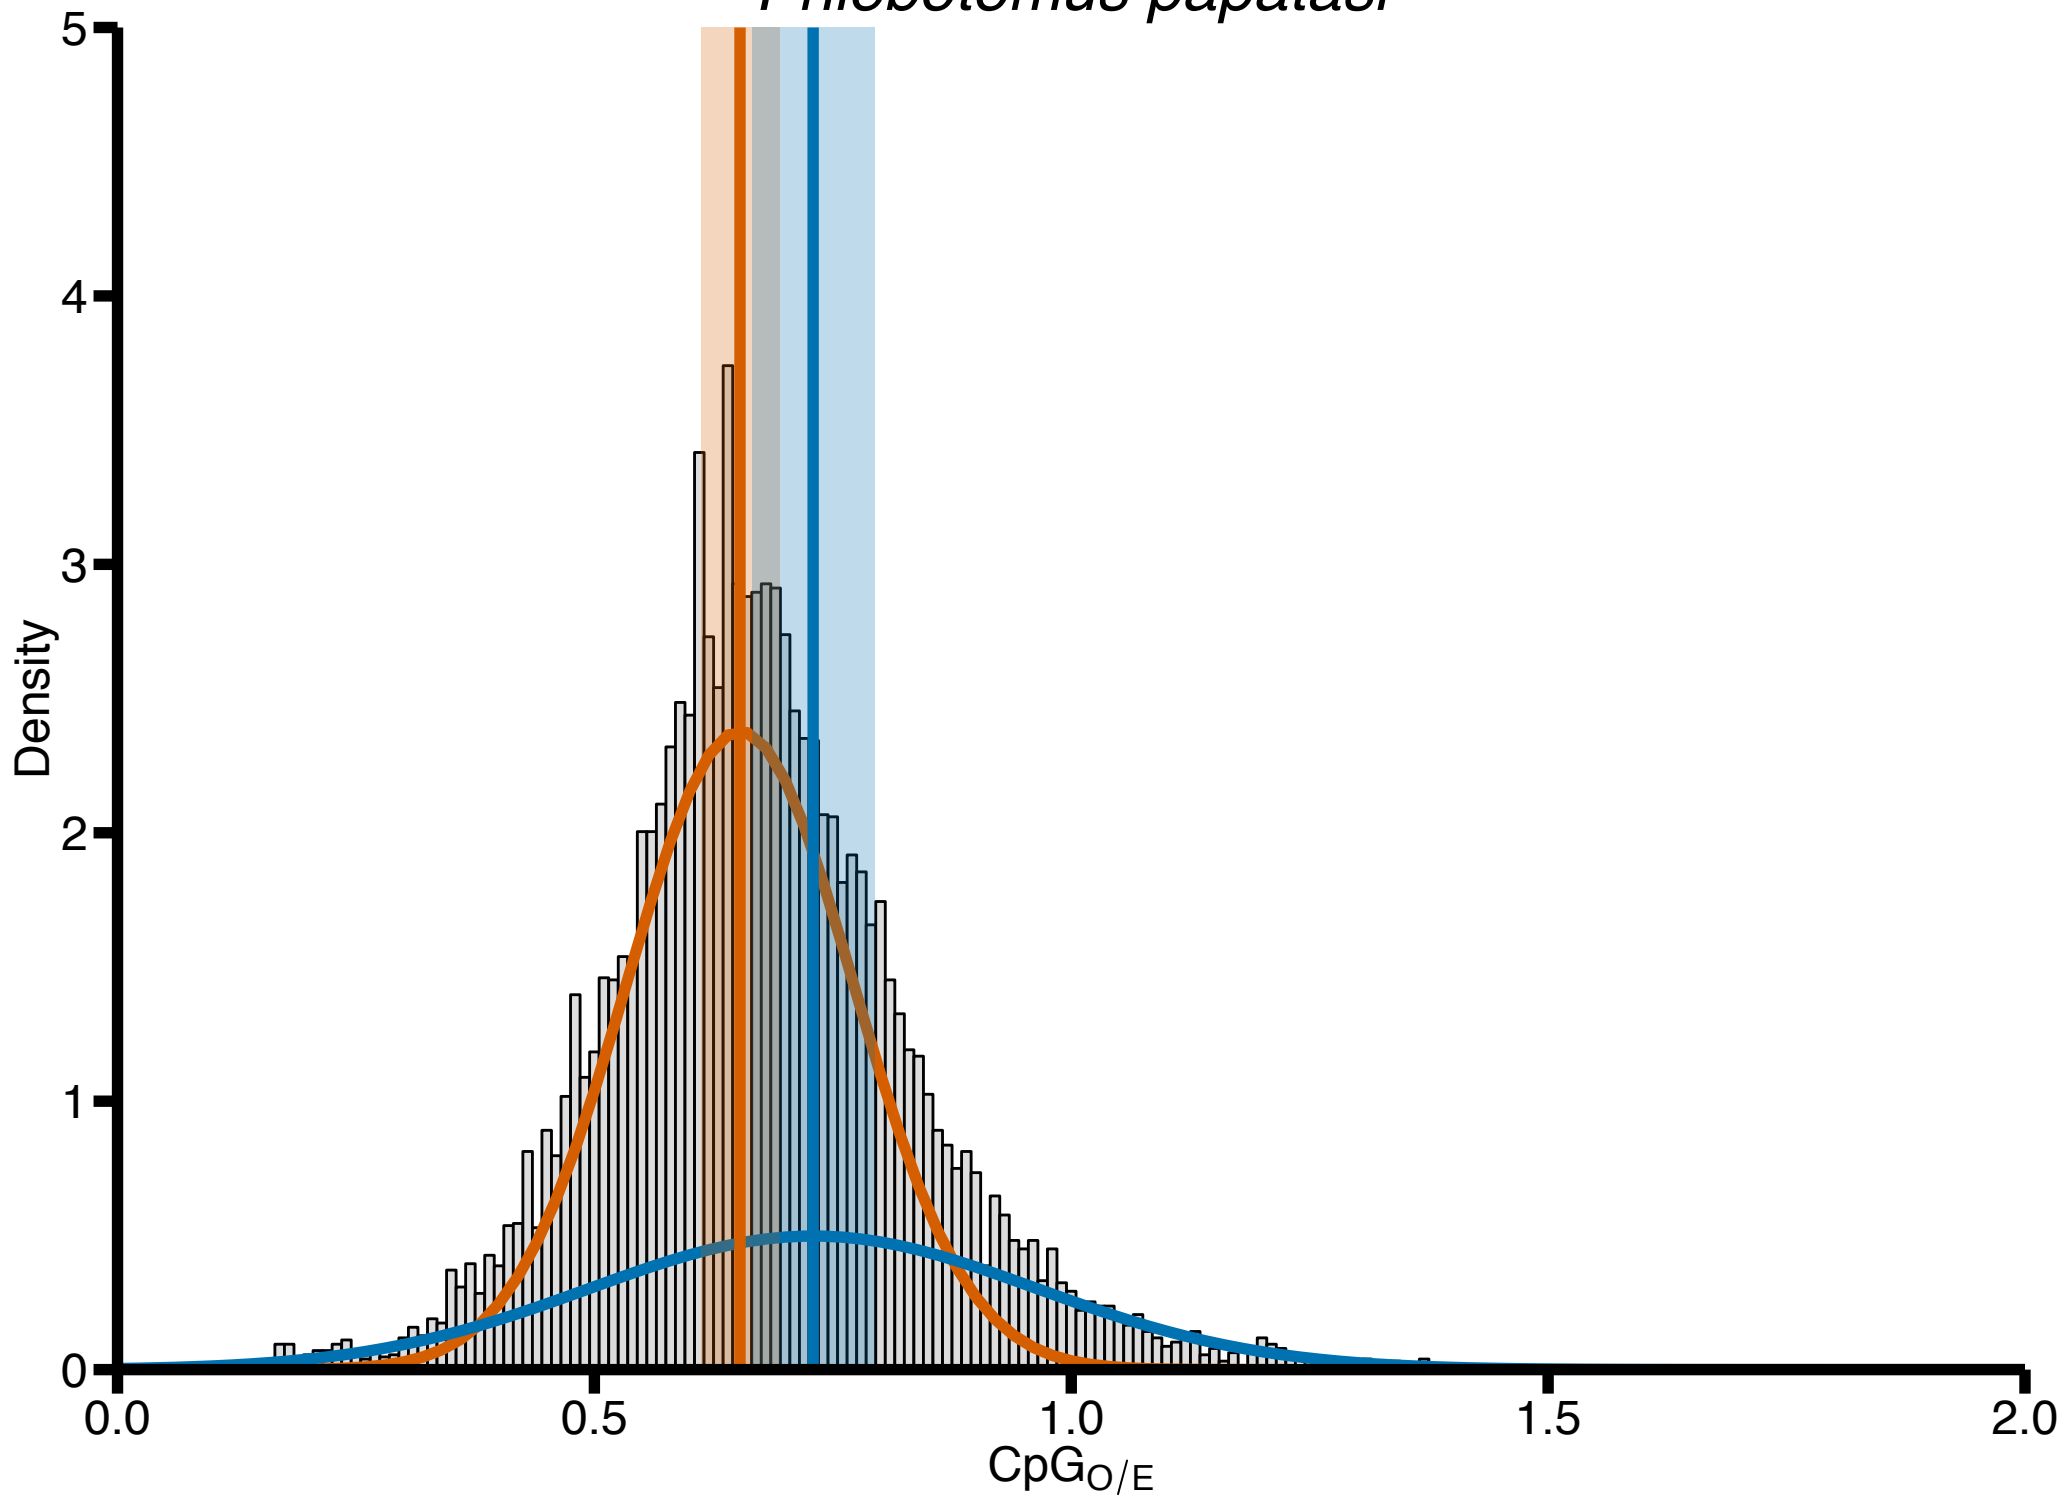

*Stomoxys calcitrans*

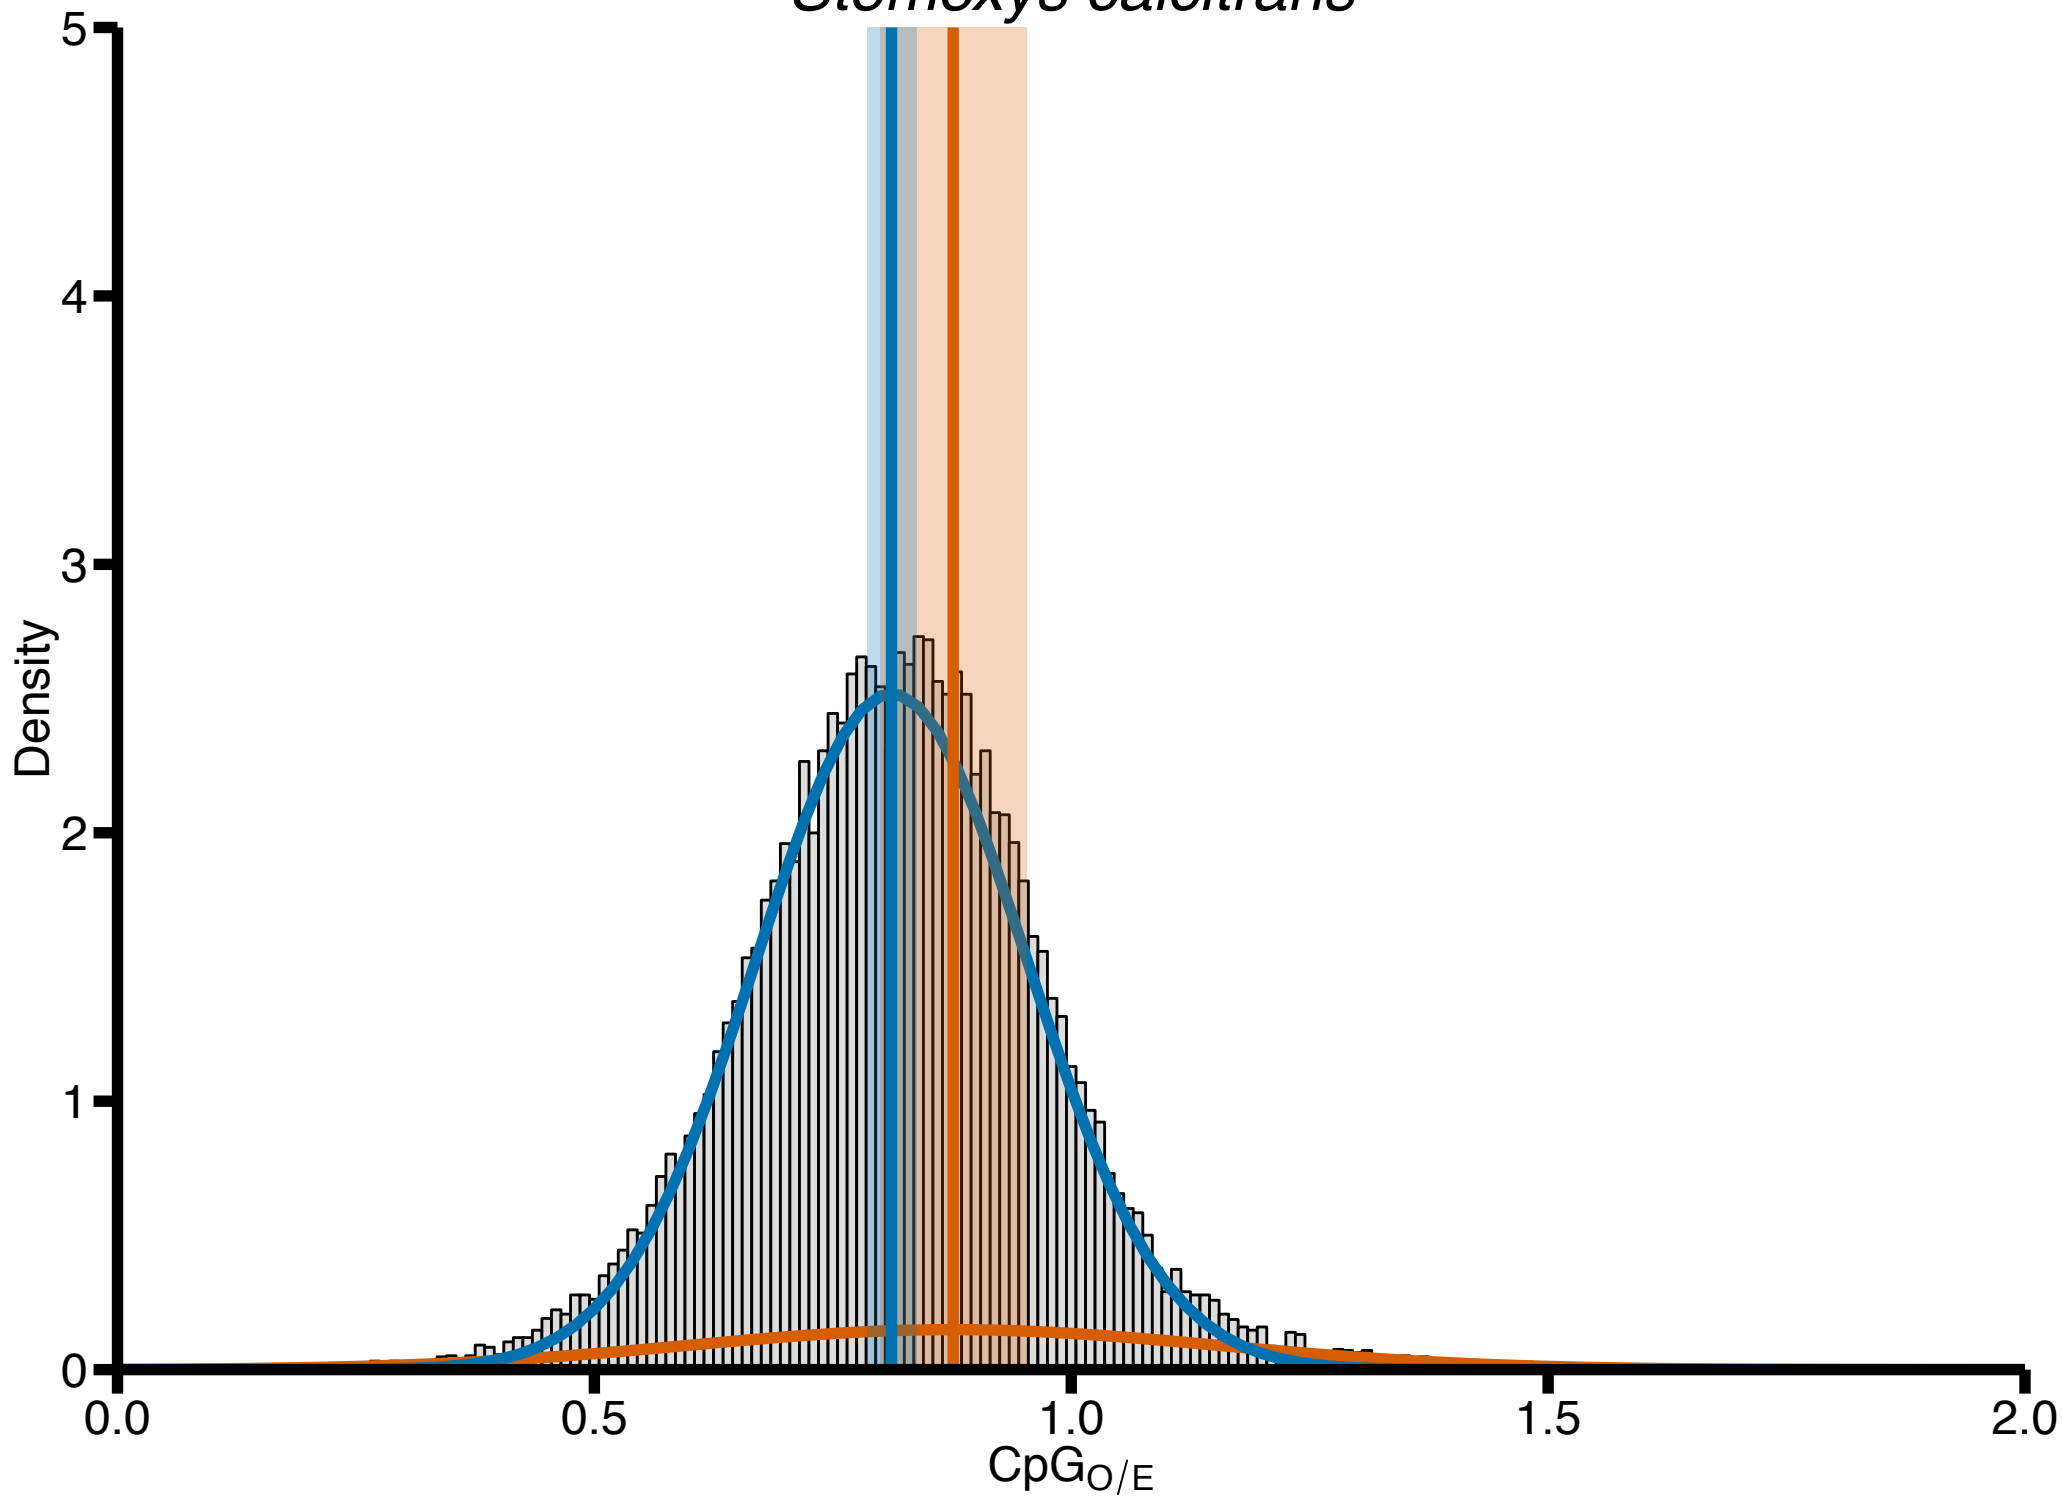

*Ephemera danica*

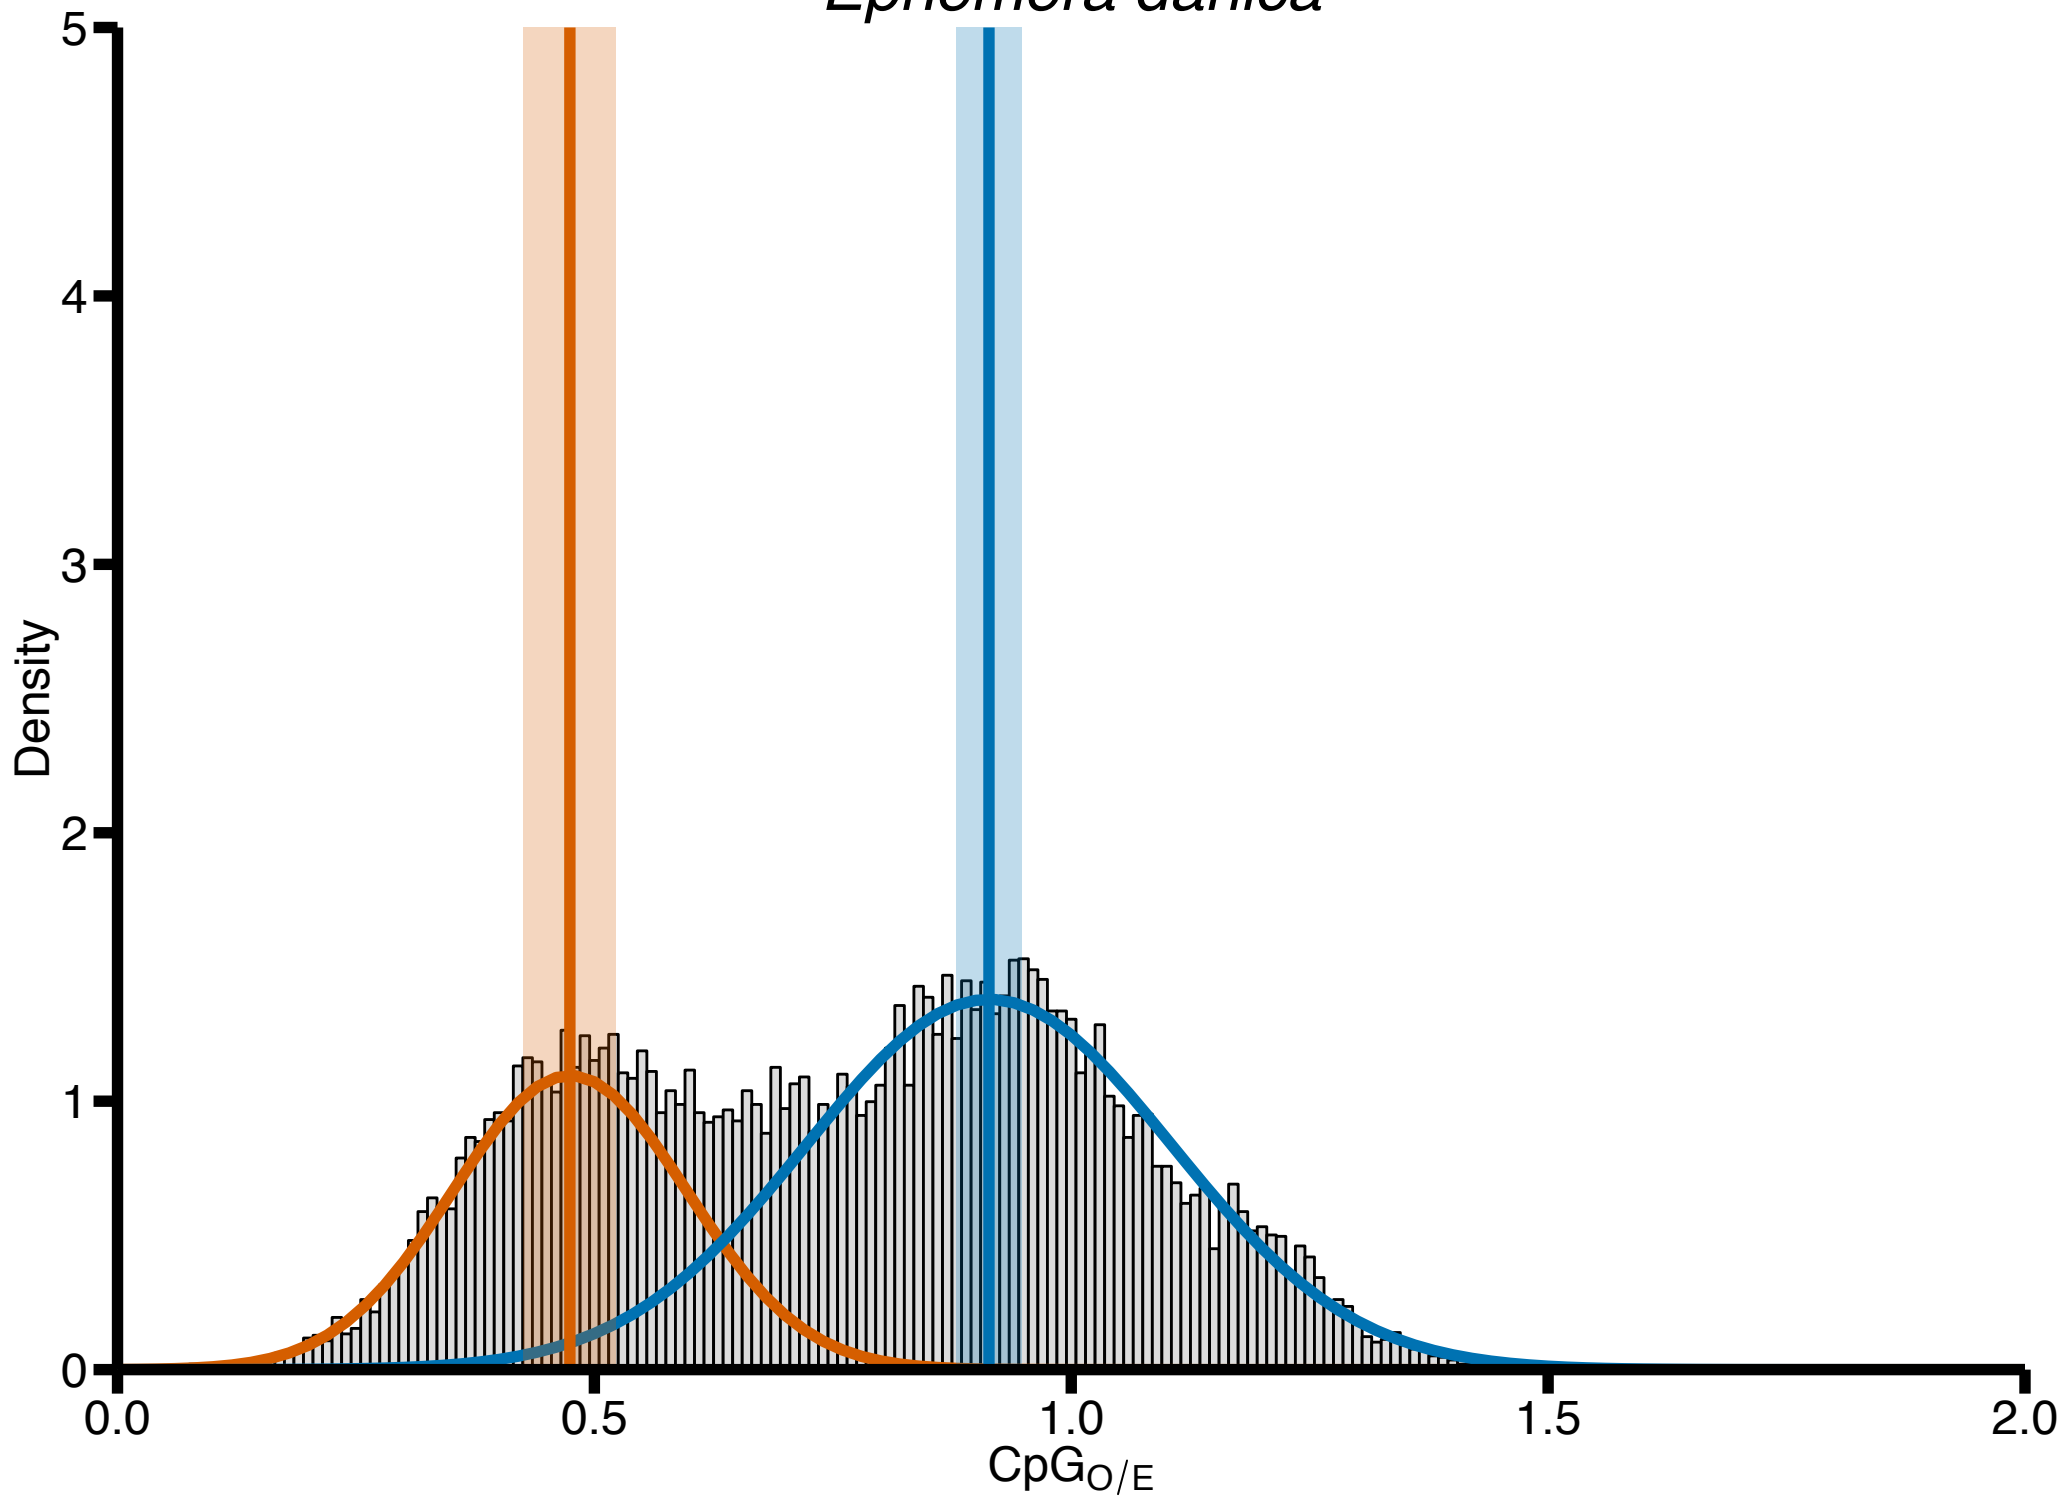

*Acyrtosiphon pisum*

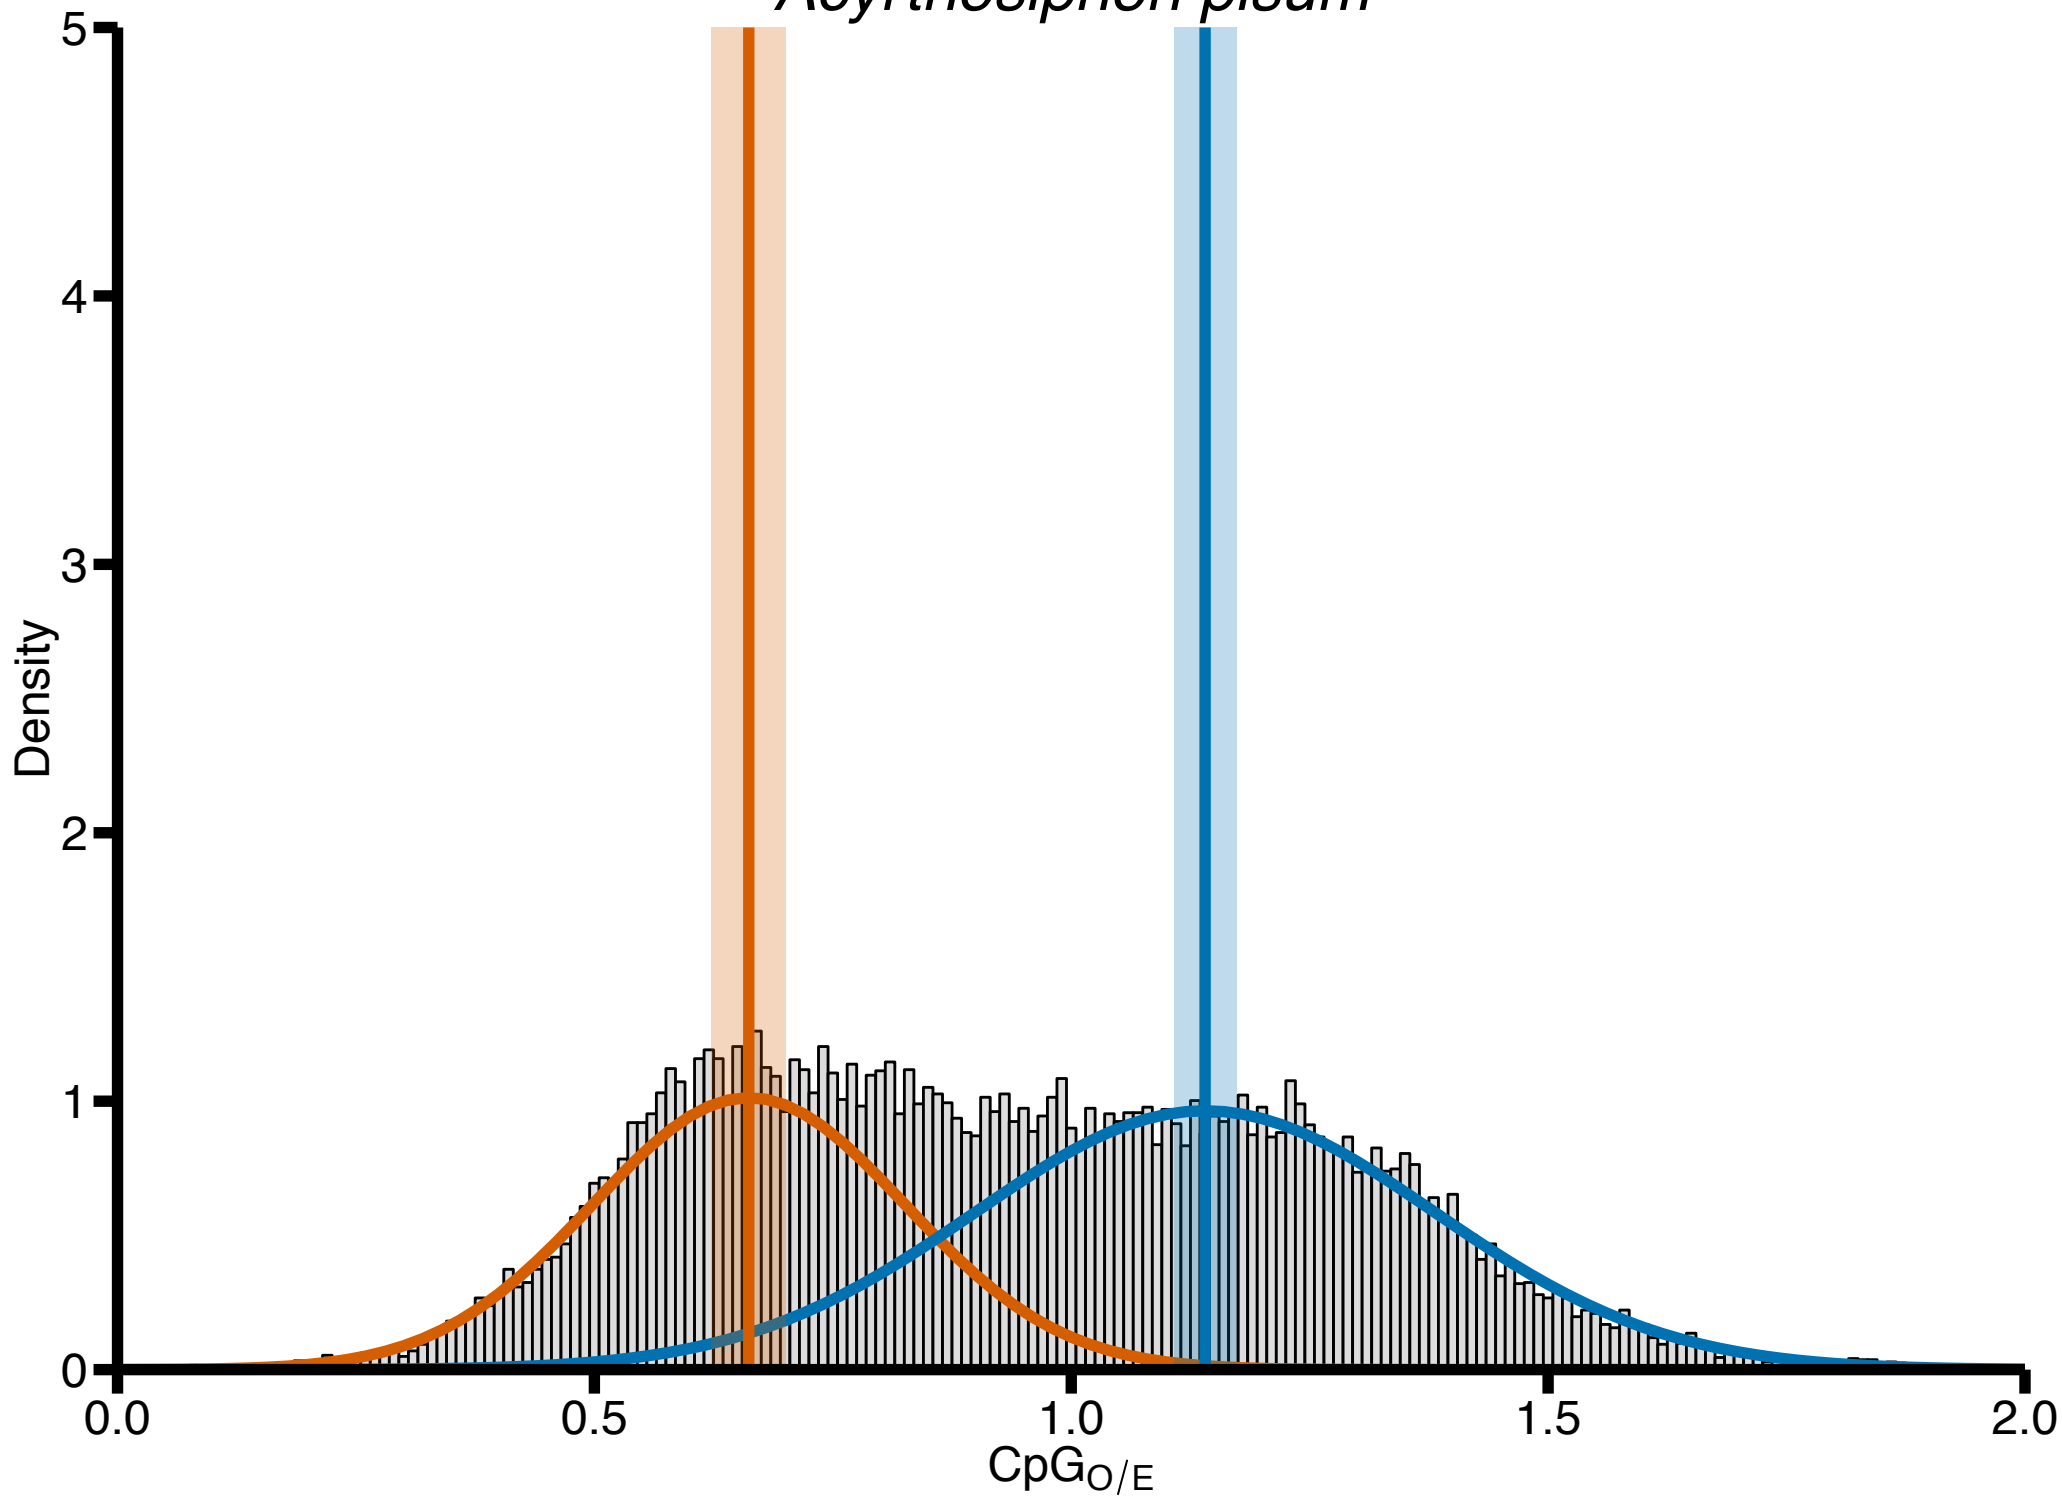

*Cimex lectularius*

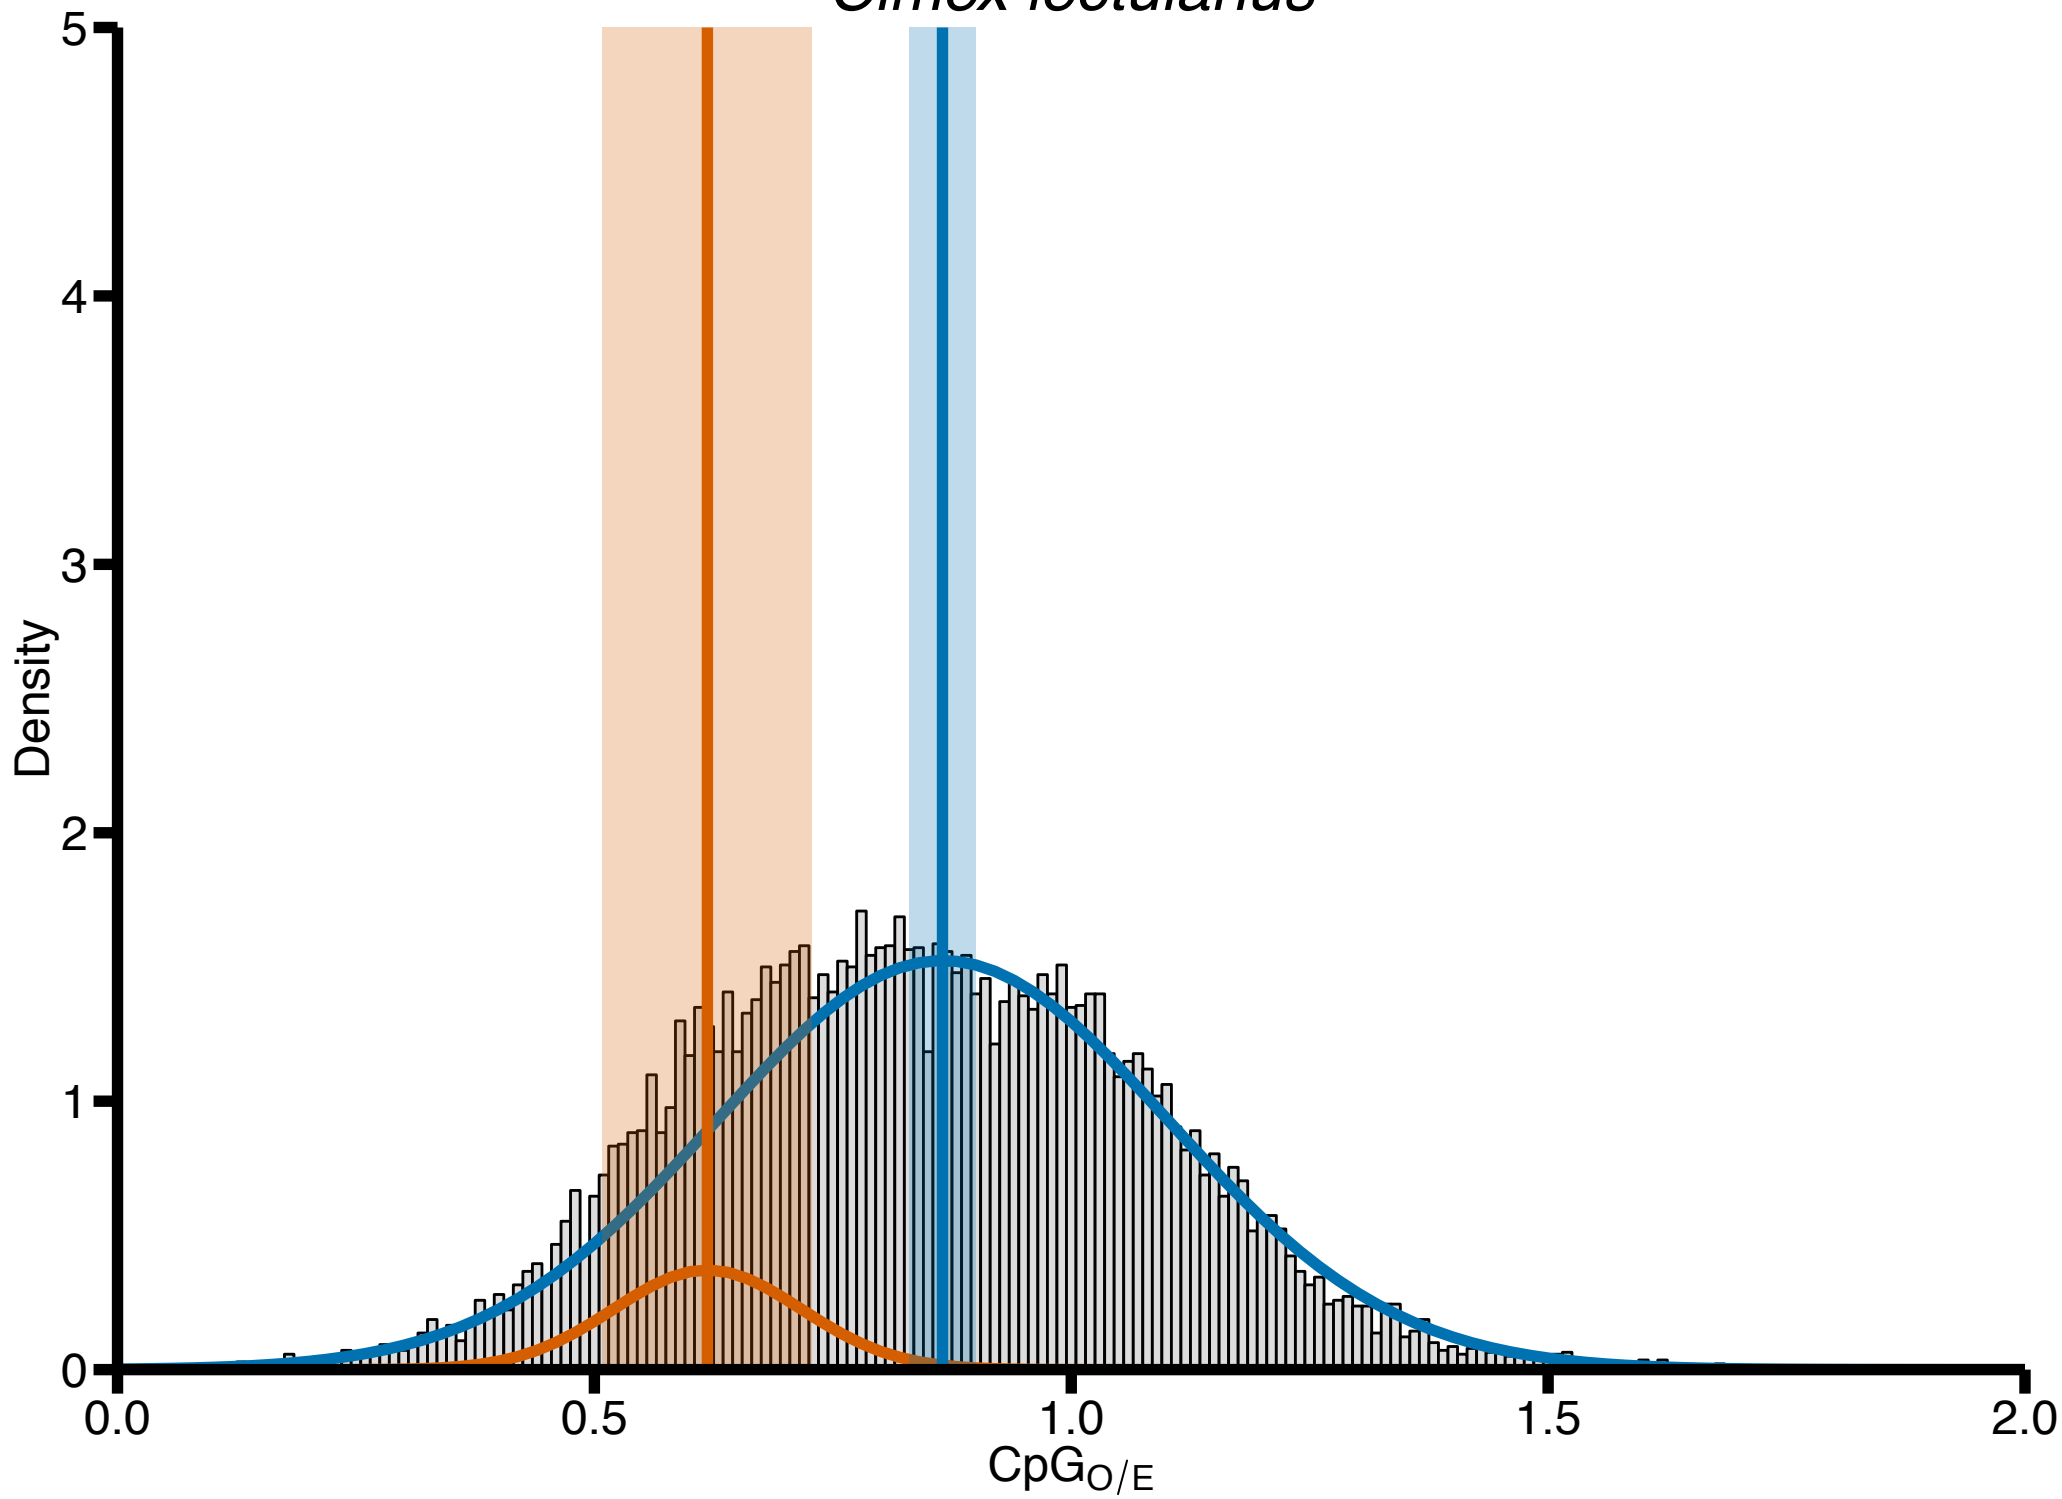

*Diaphorina citri*

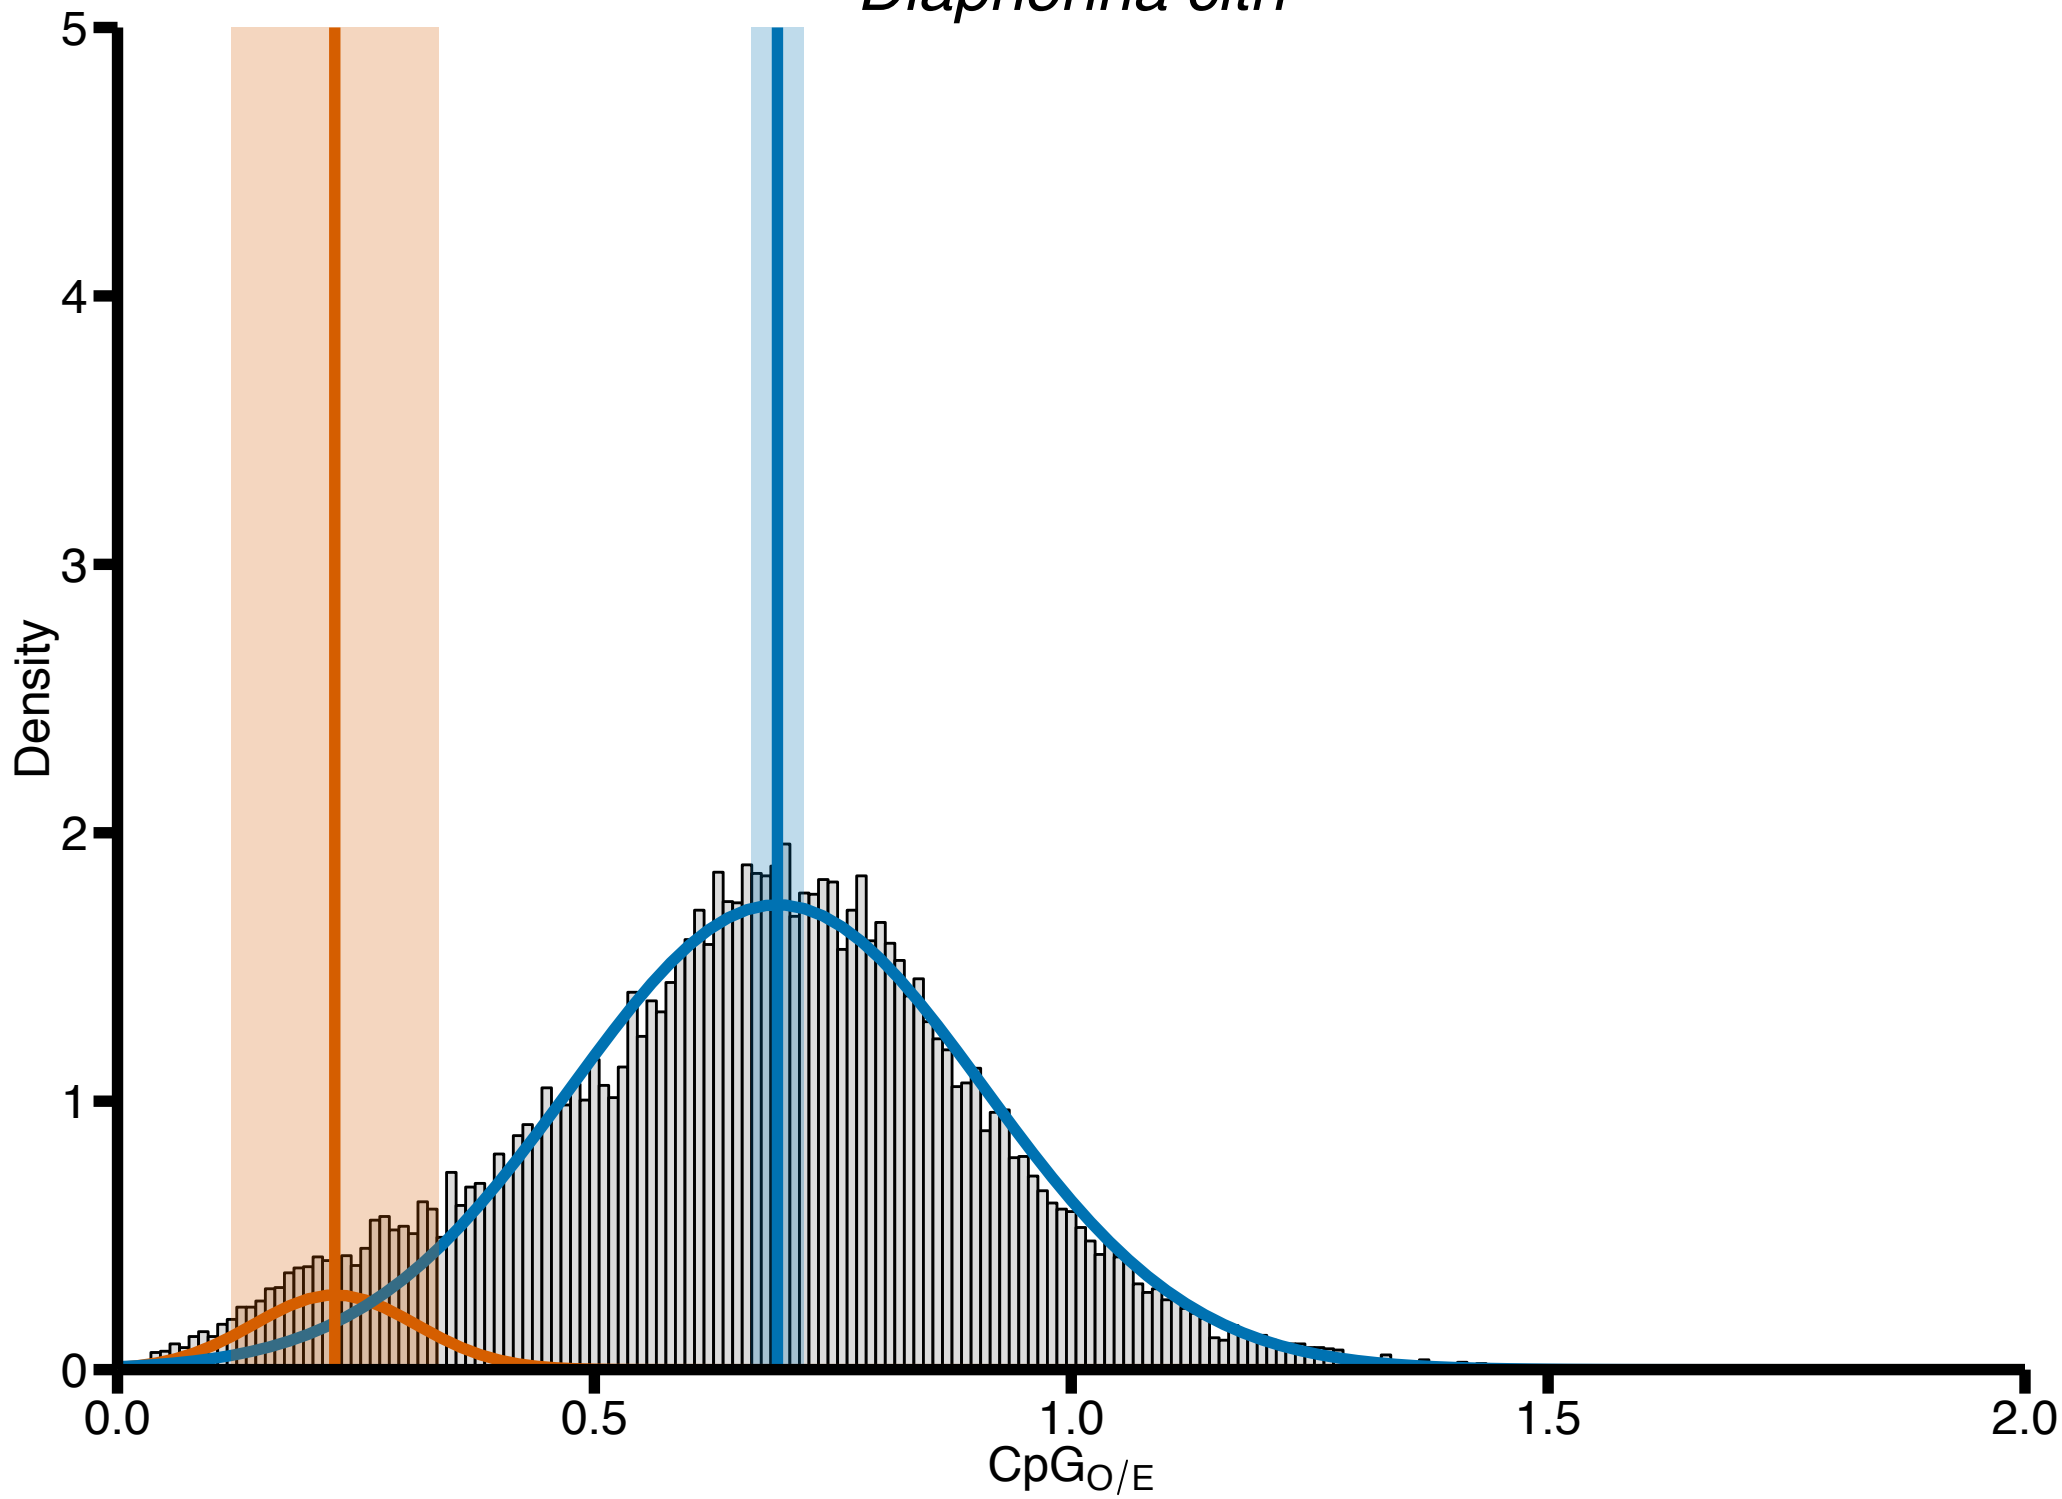

*Gerris buenoi*

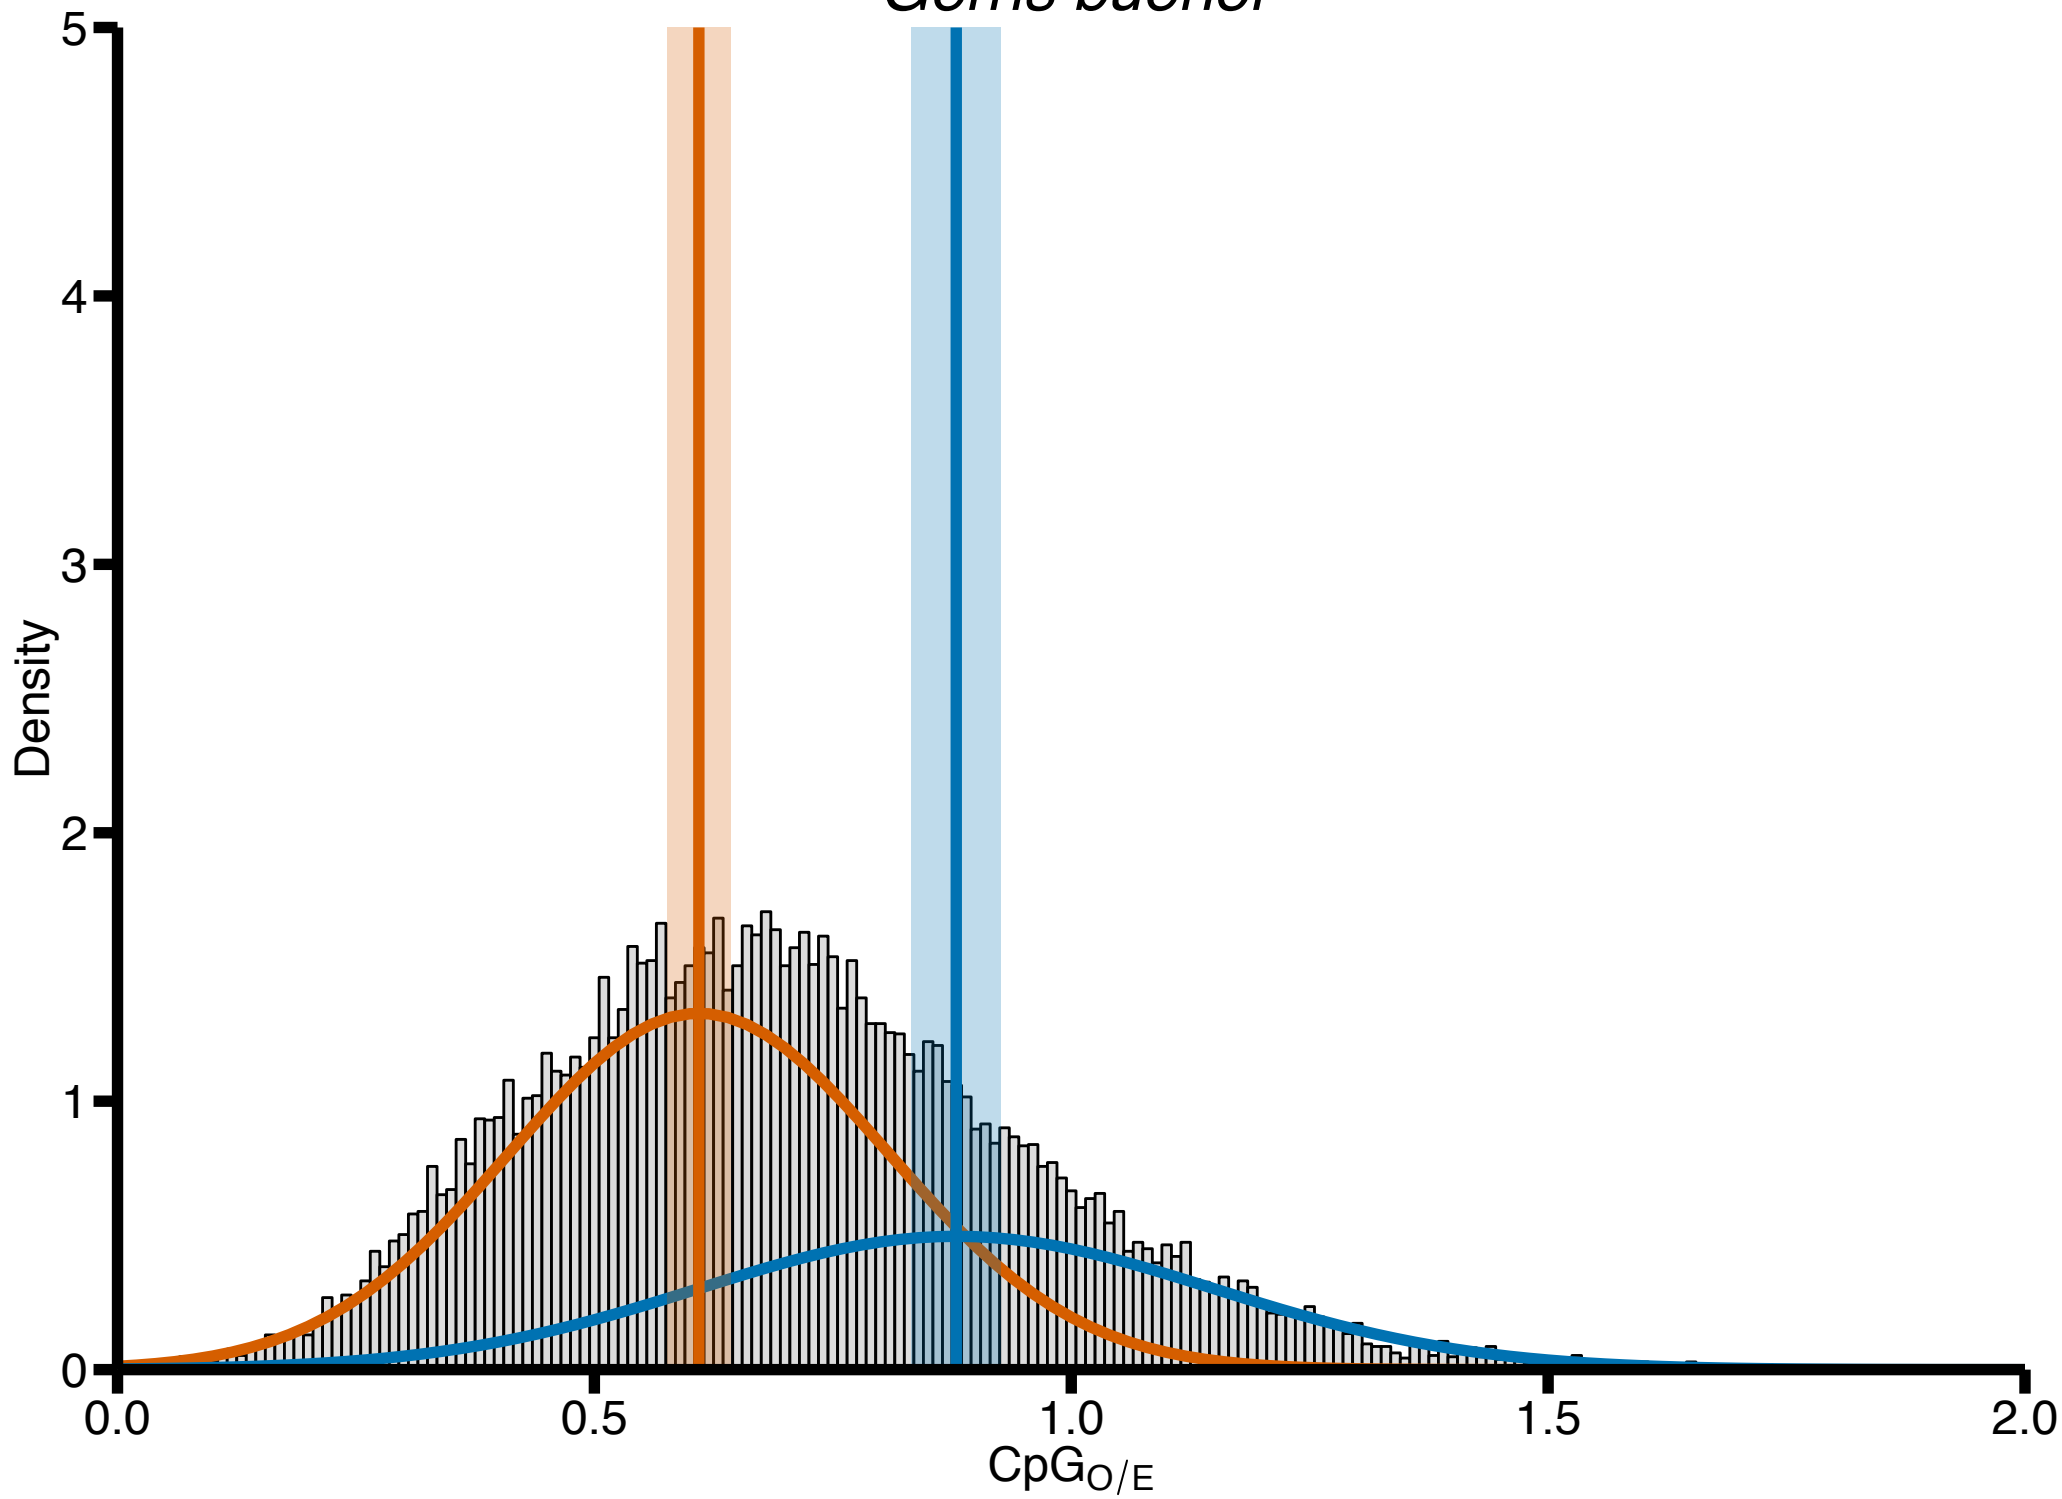



*Halyomorpha halys*

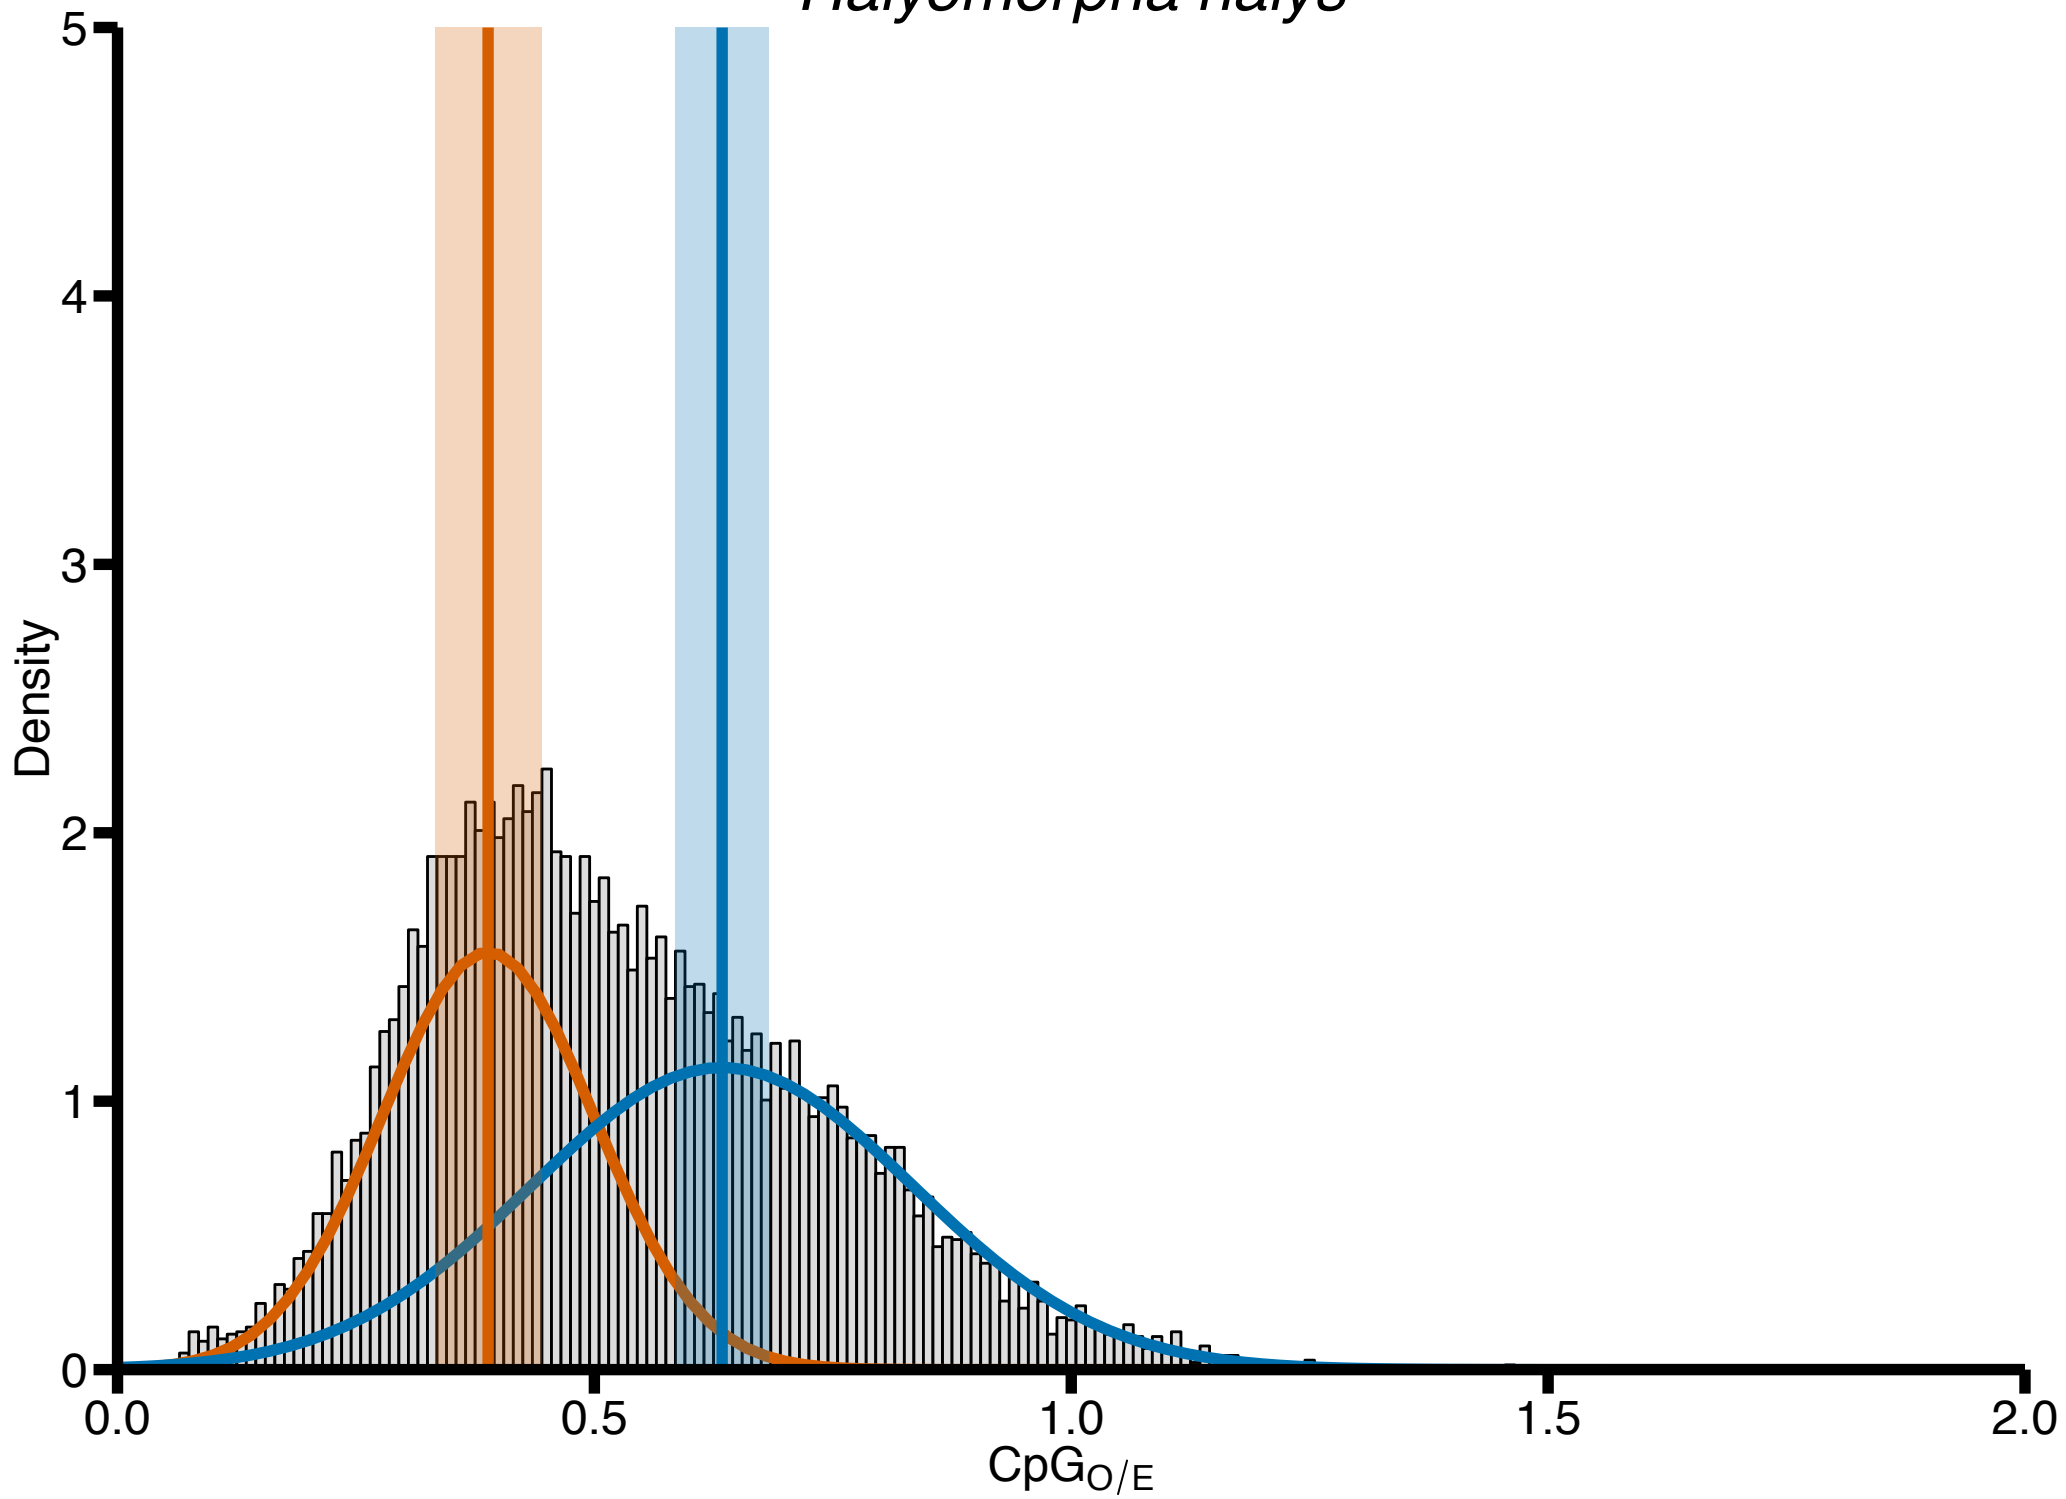

*Homalodisca vitripennis*

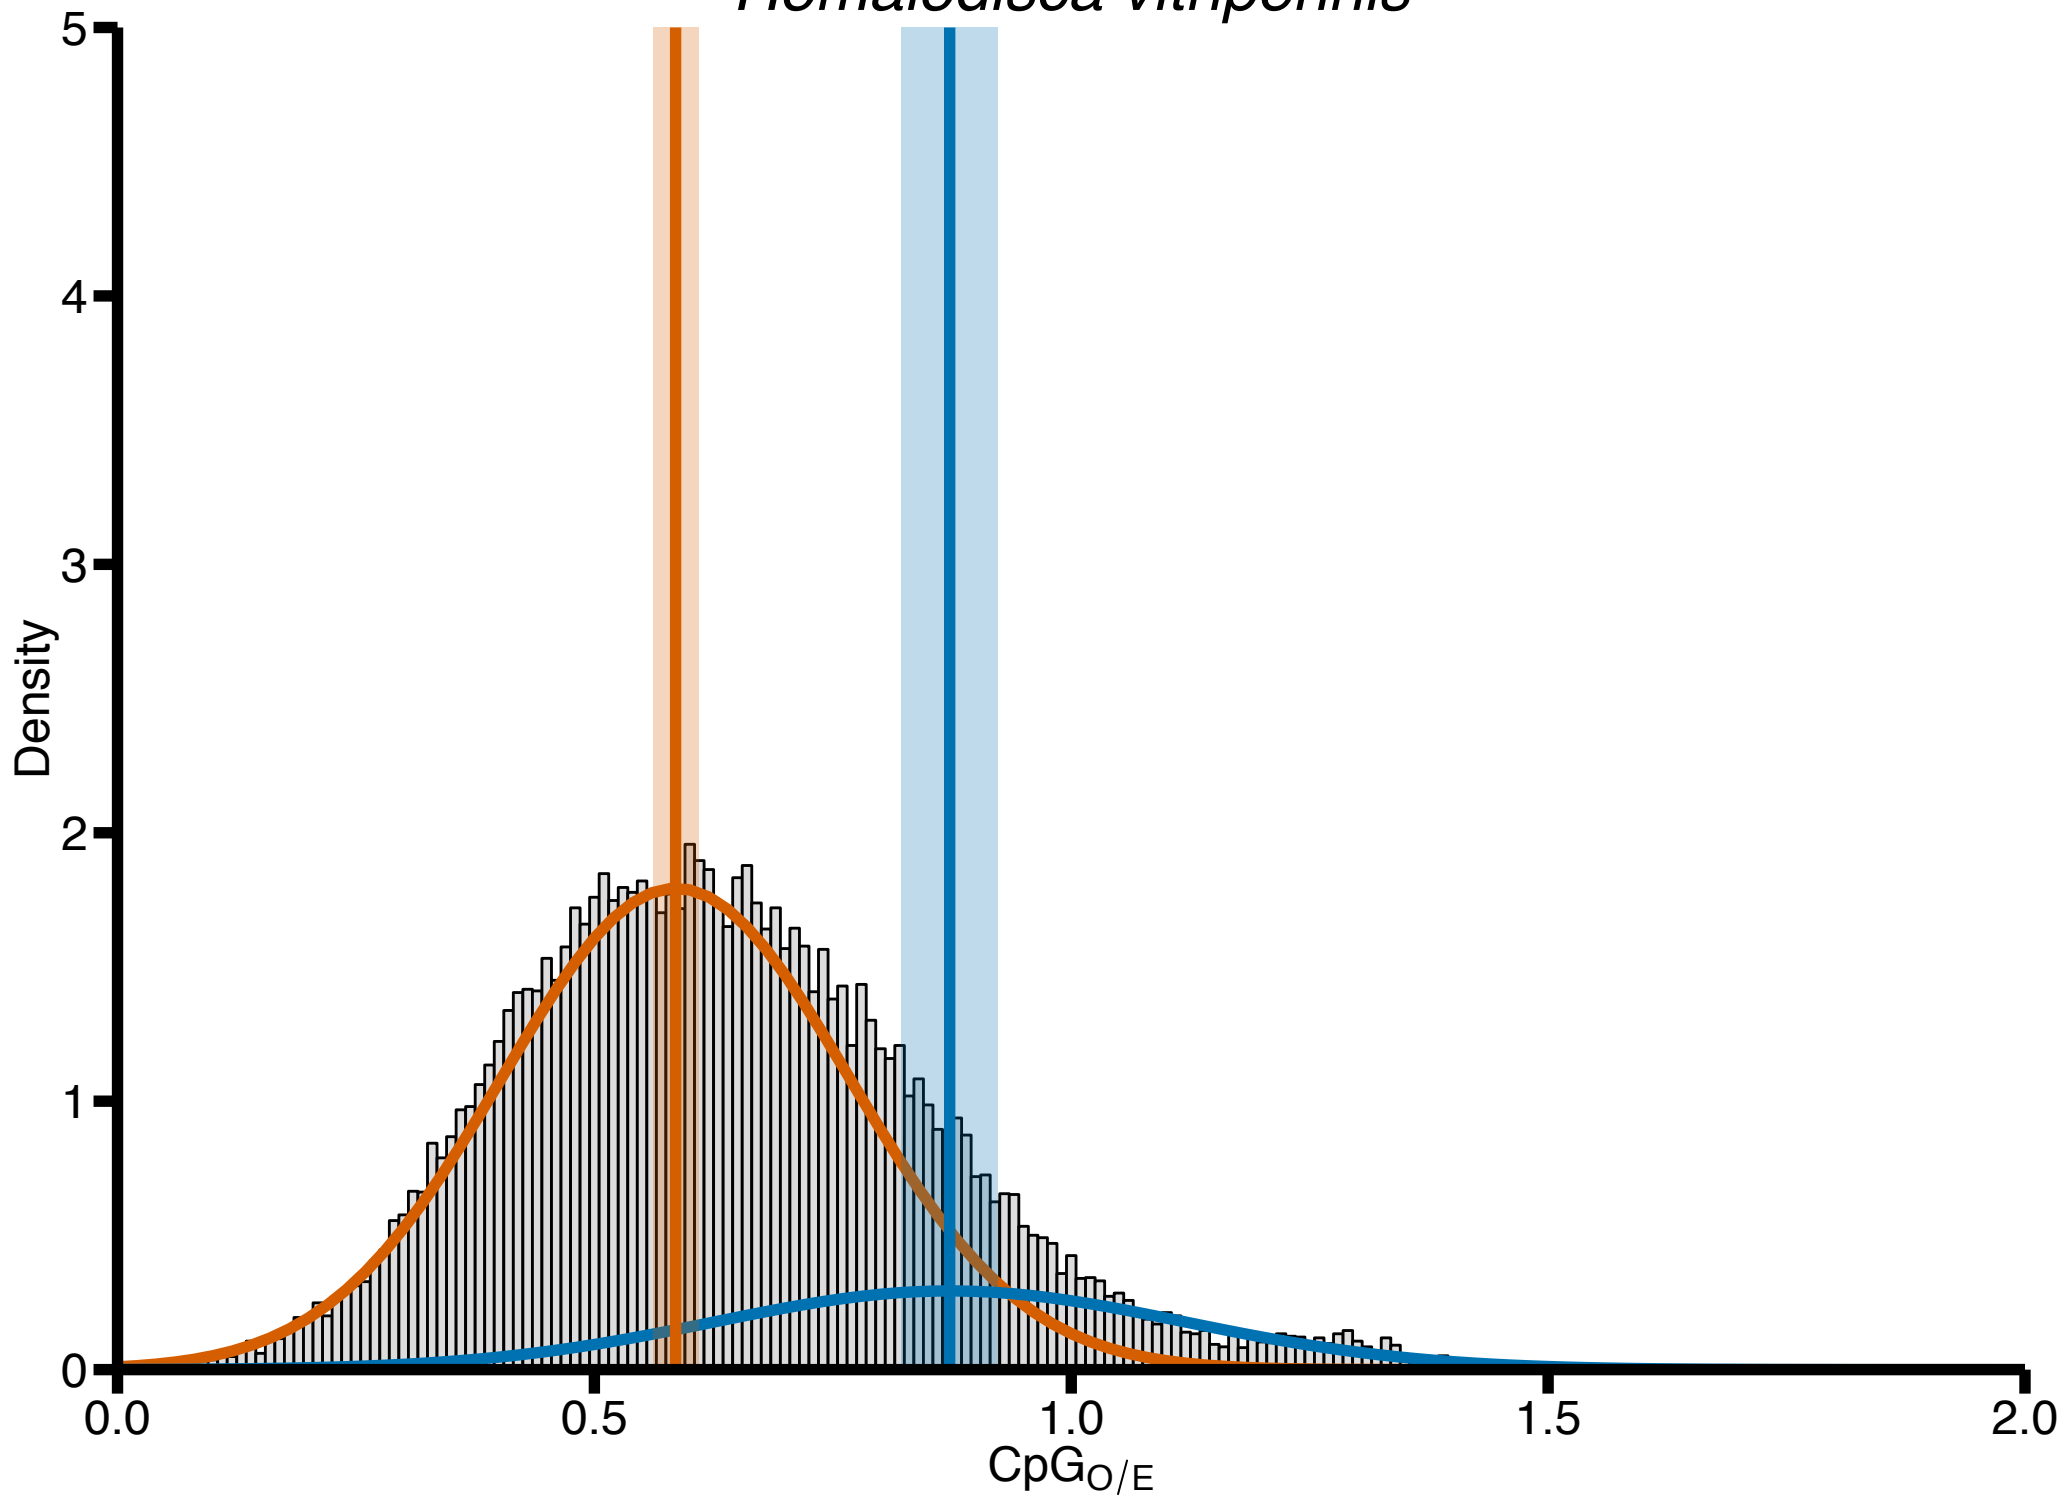

*Oncopeltus fasciatus*

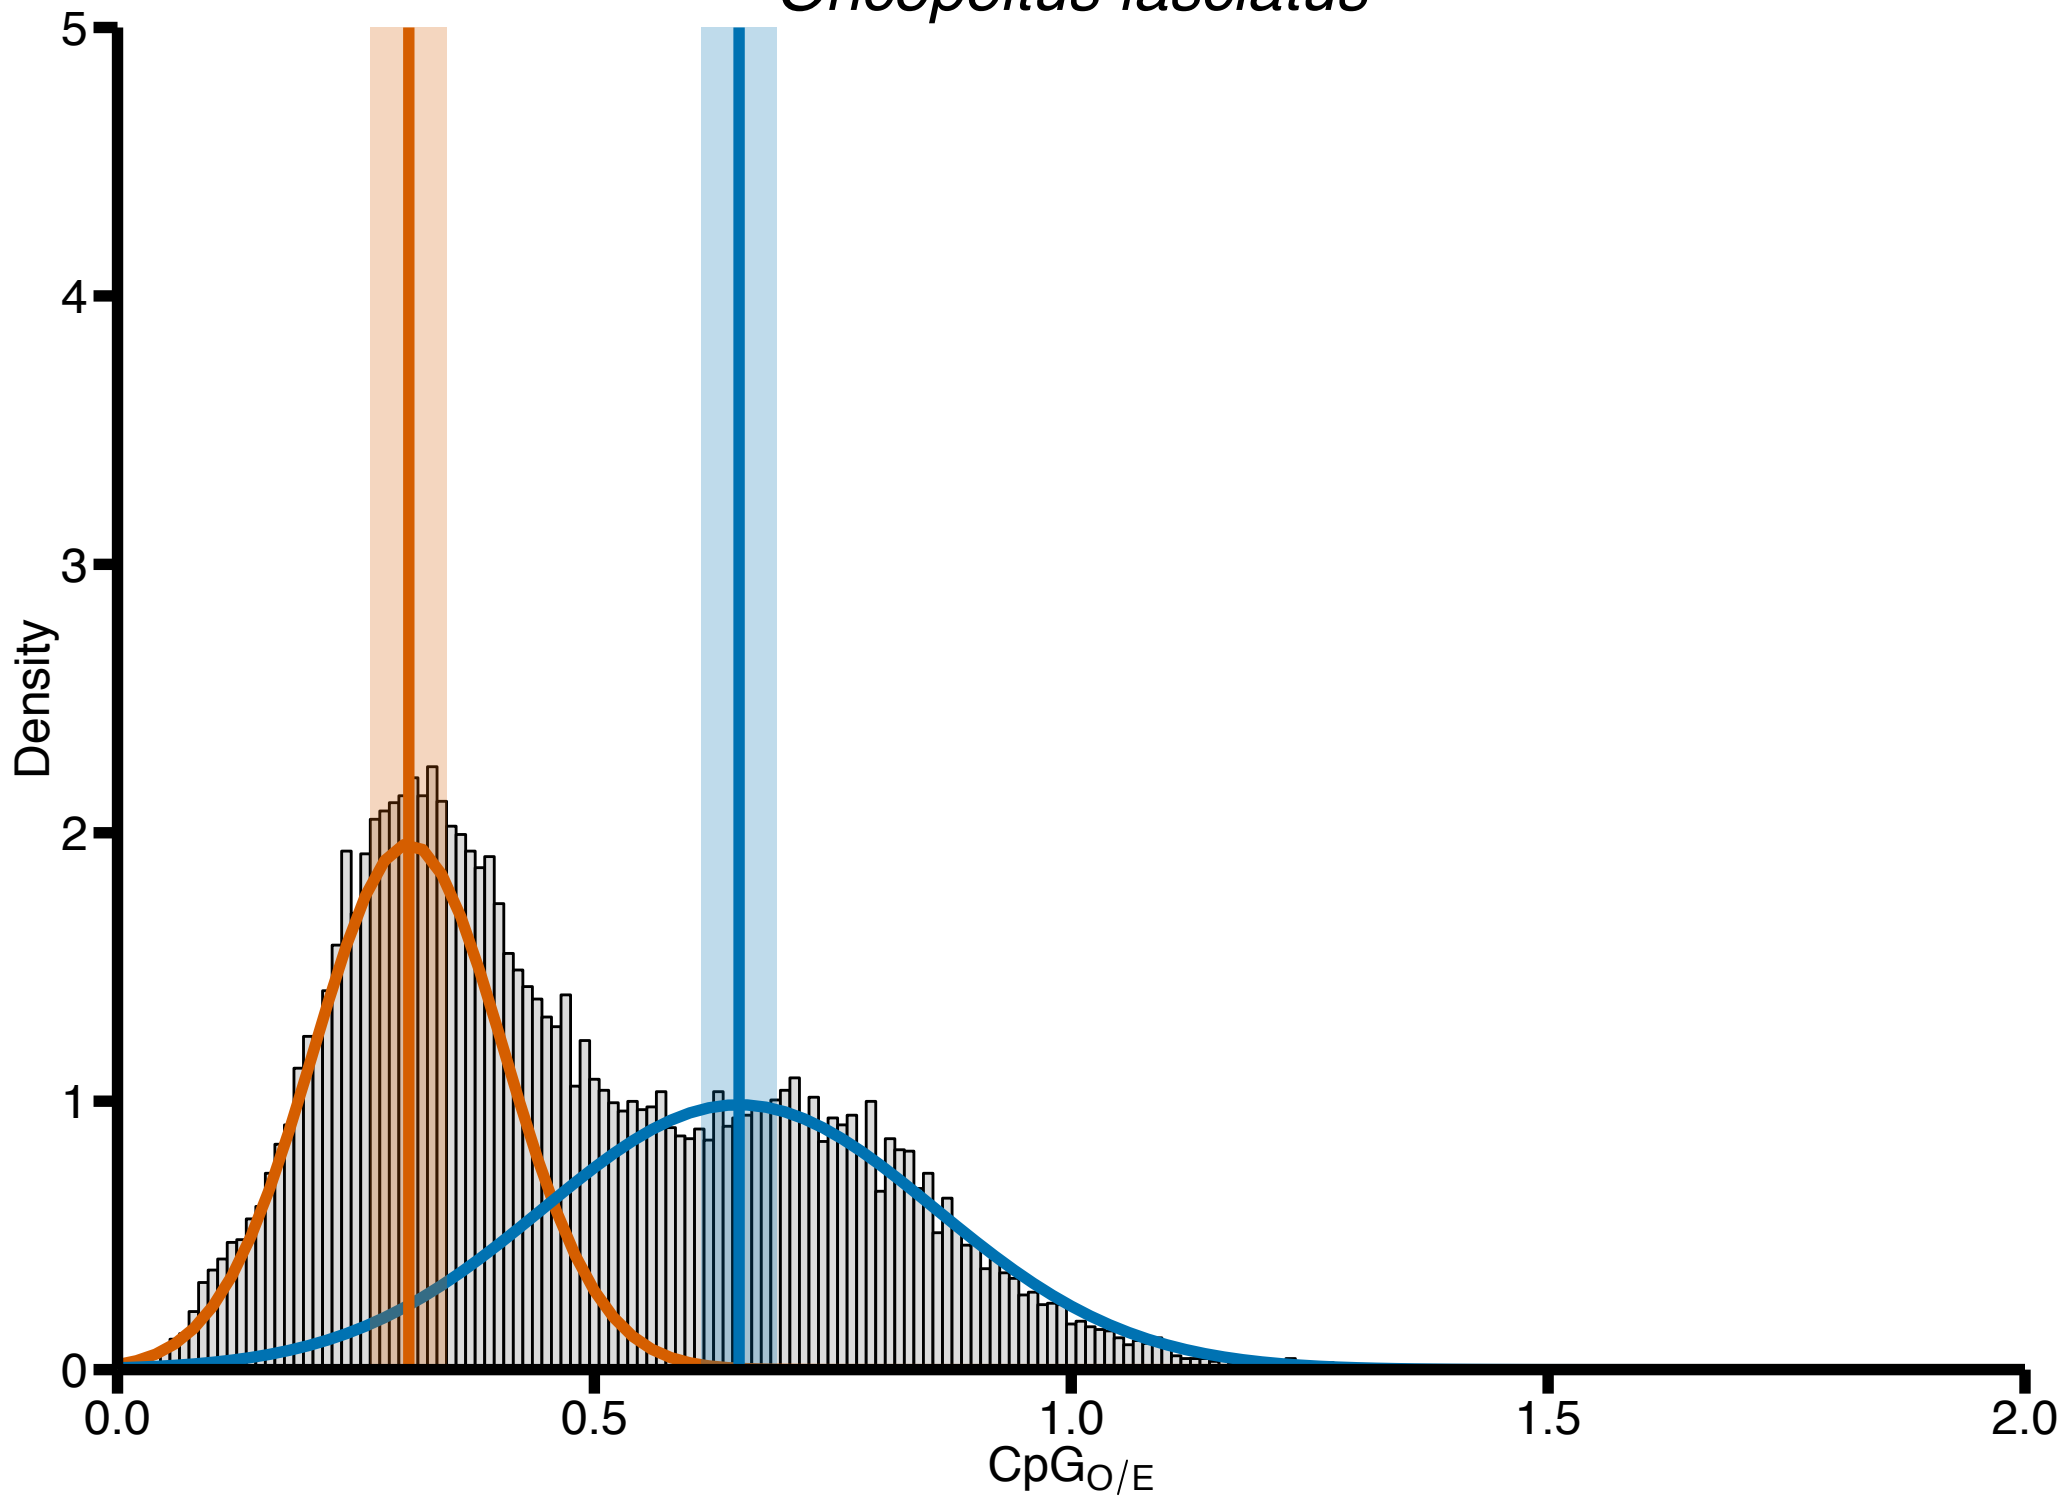

*Pachypsylla venusta*

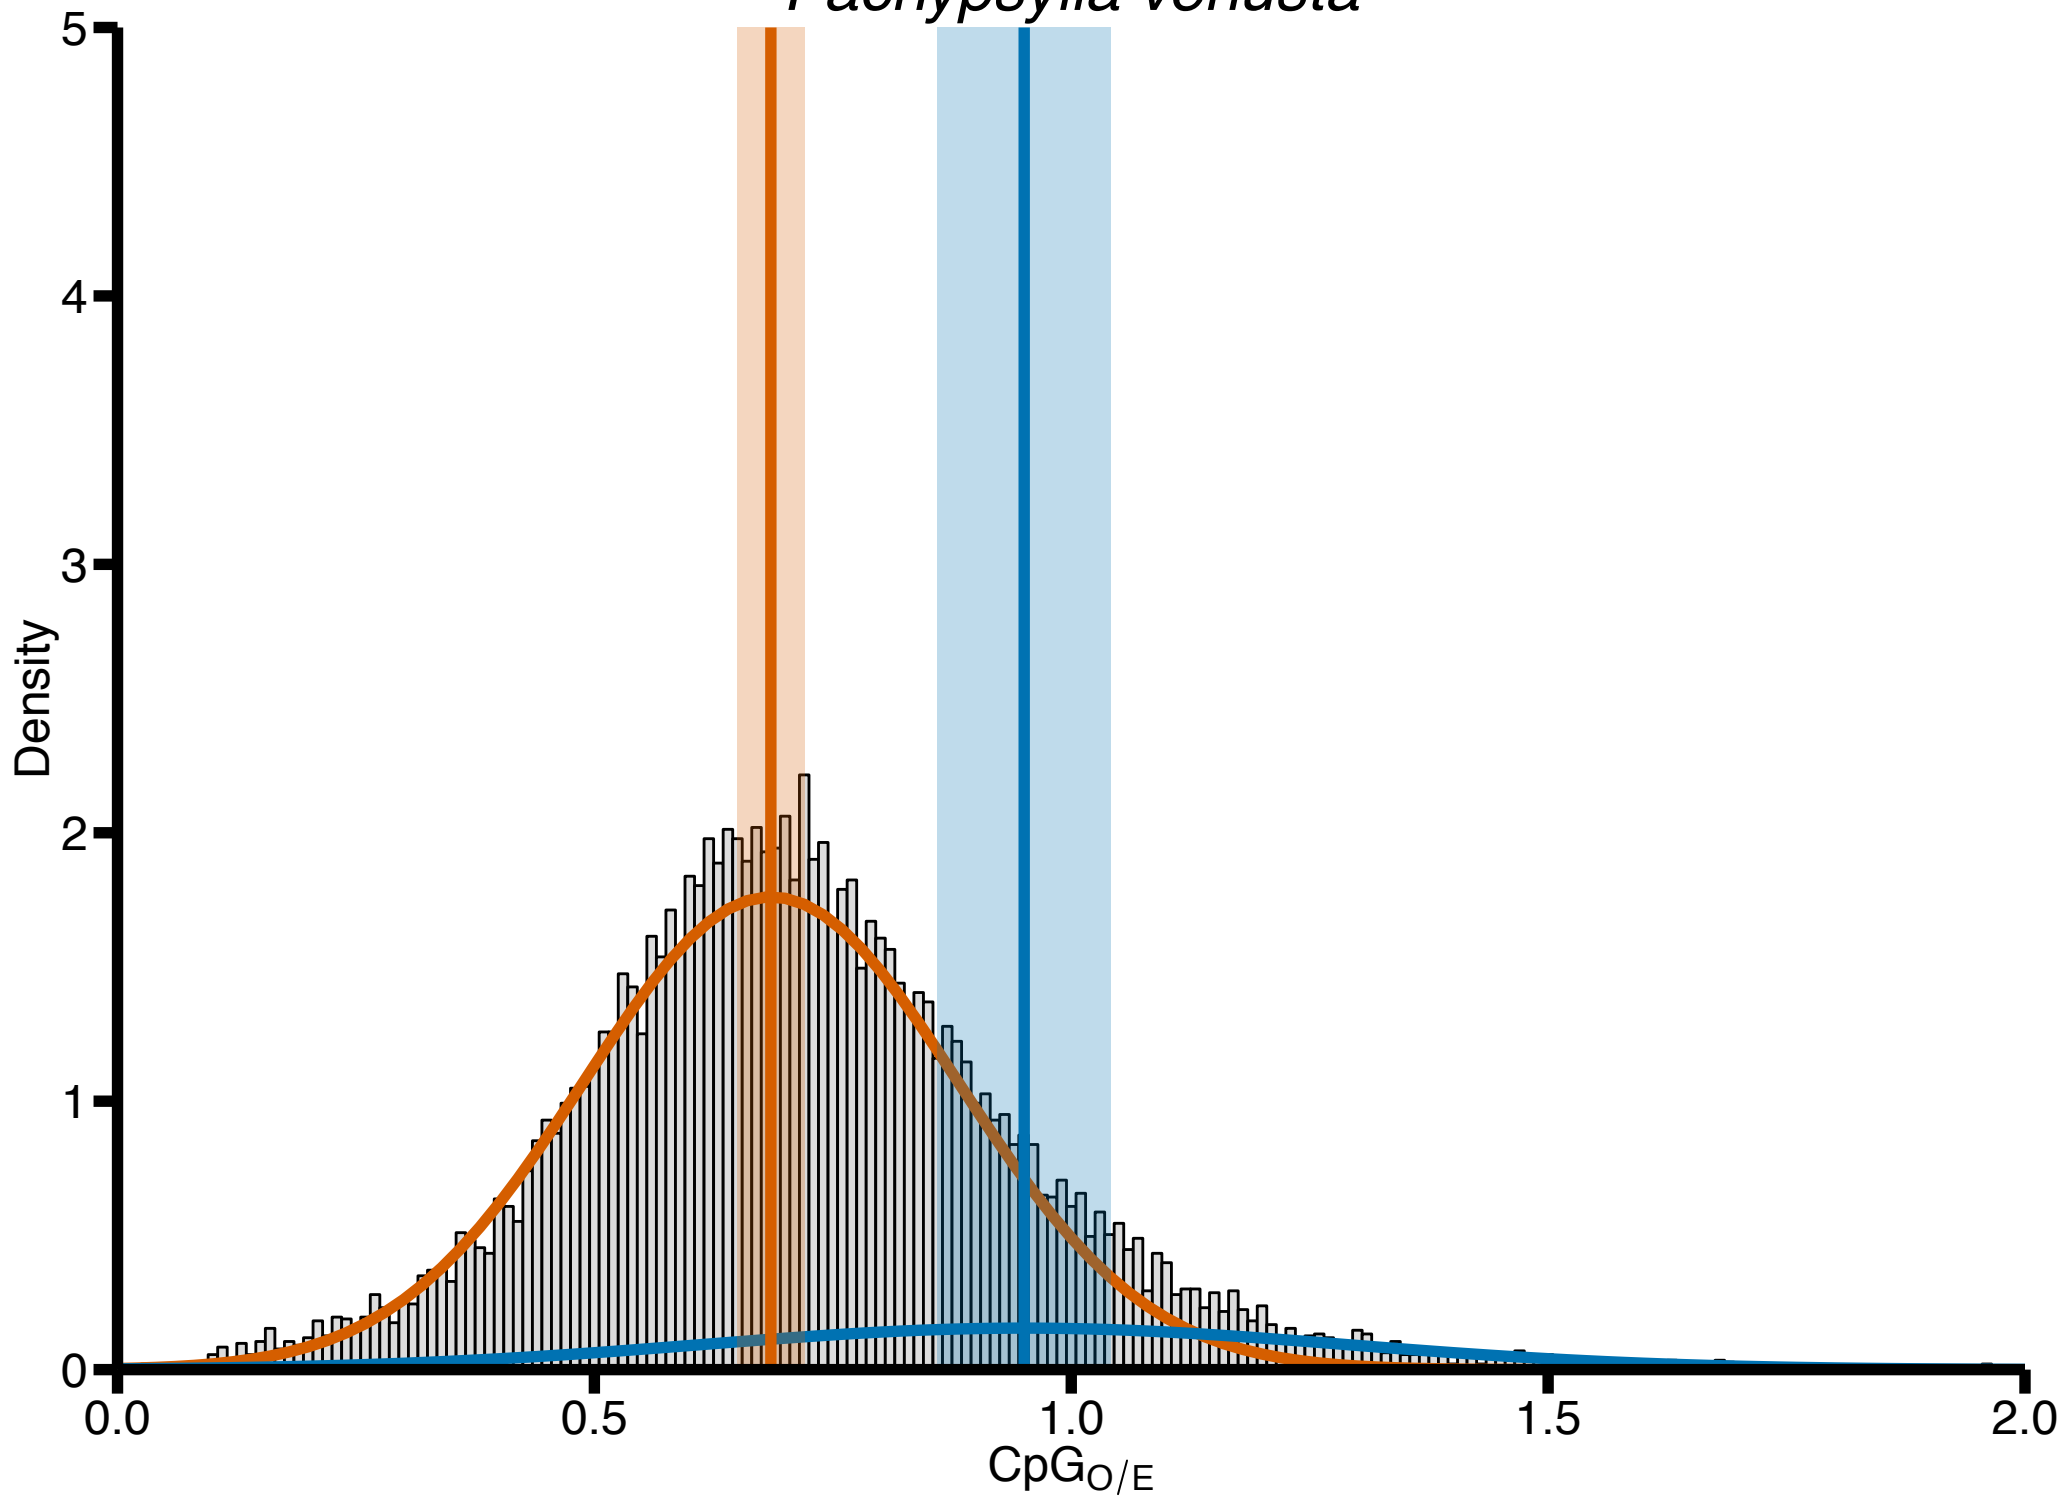

*Rhodnius prolixus*

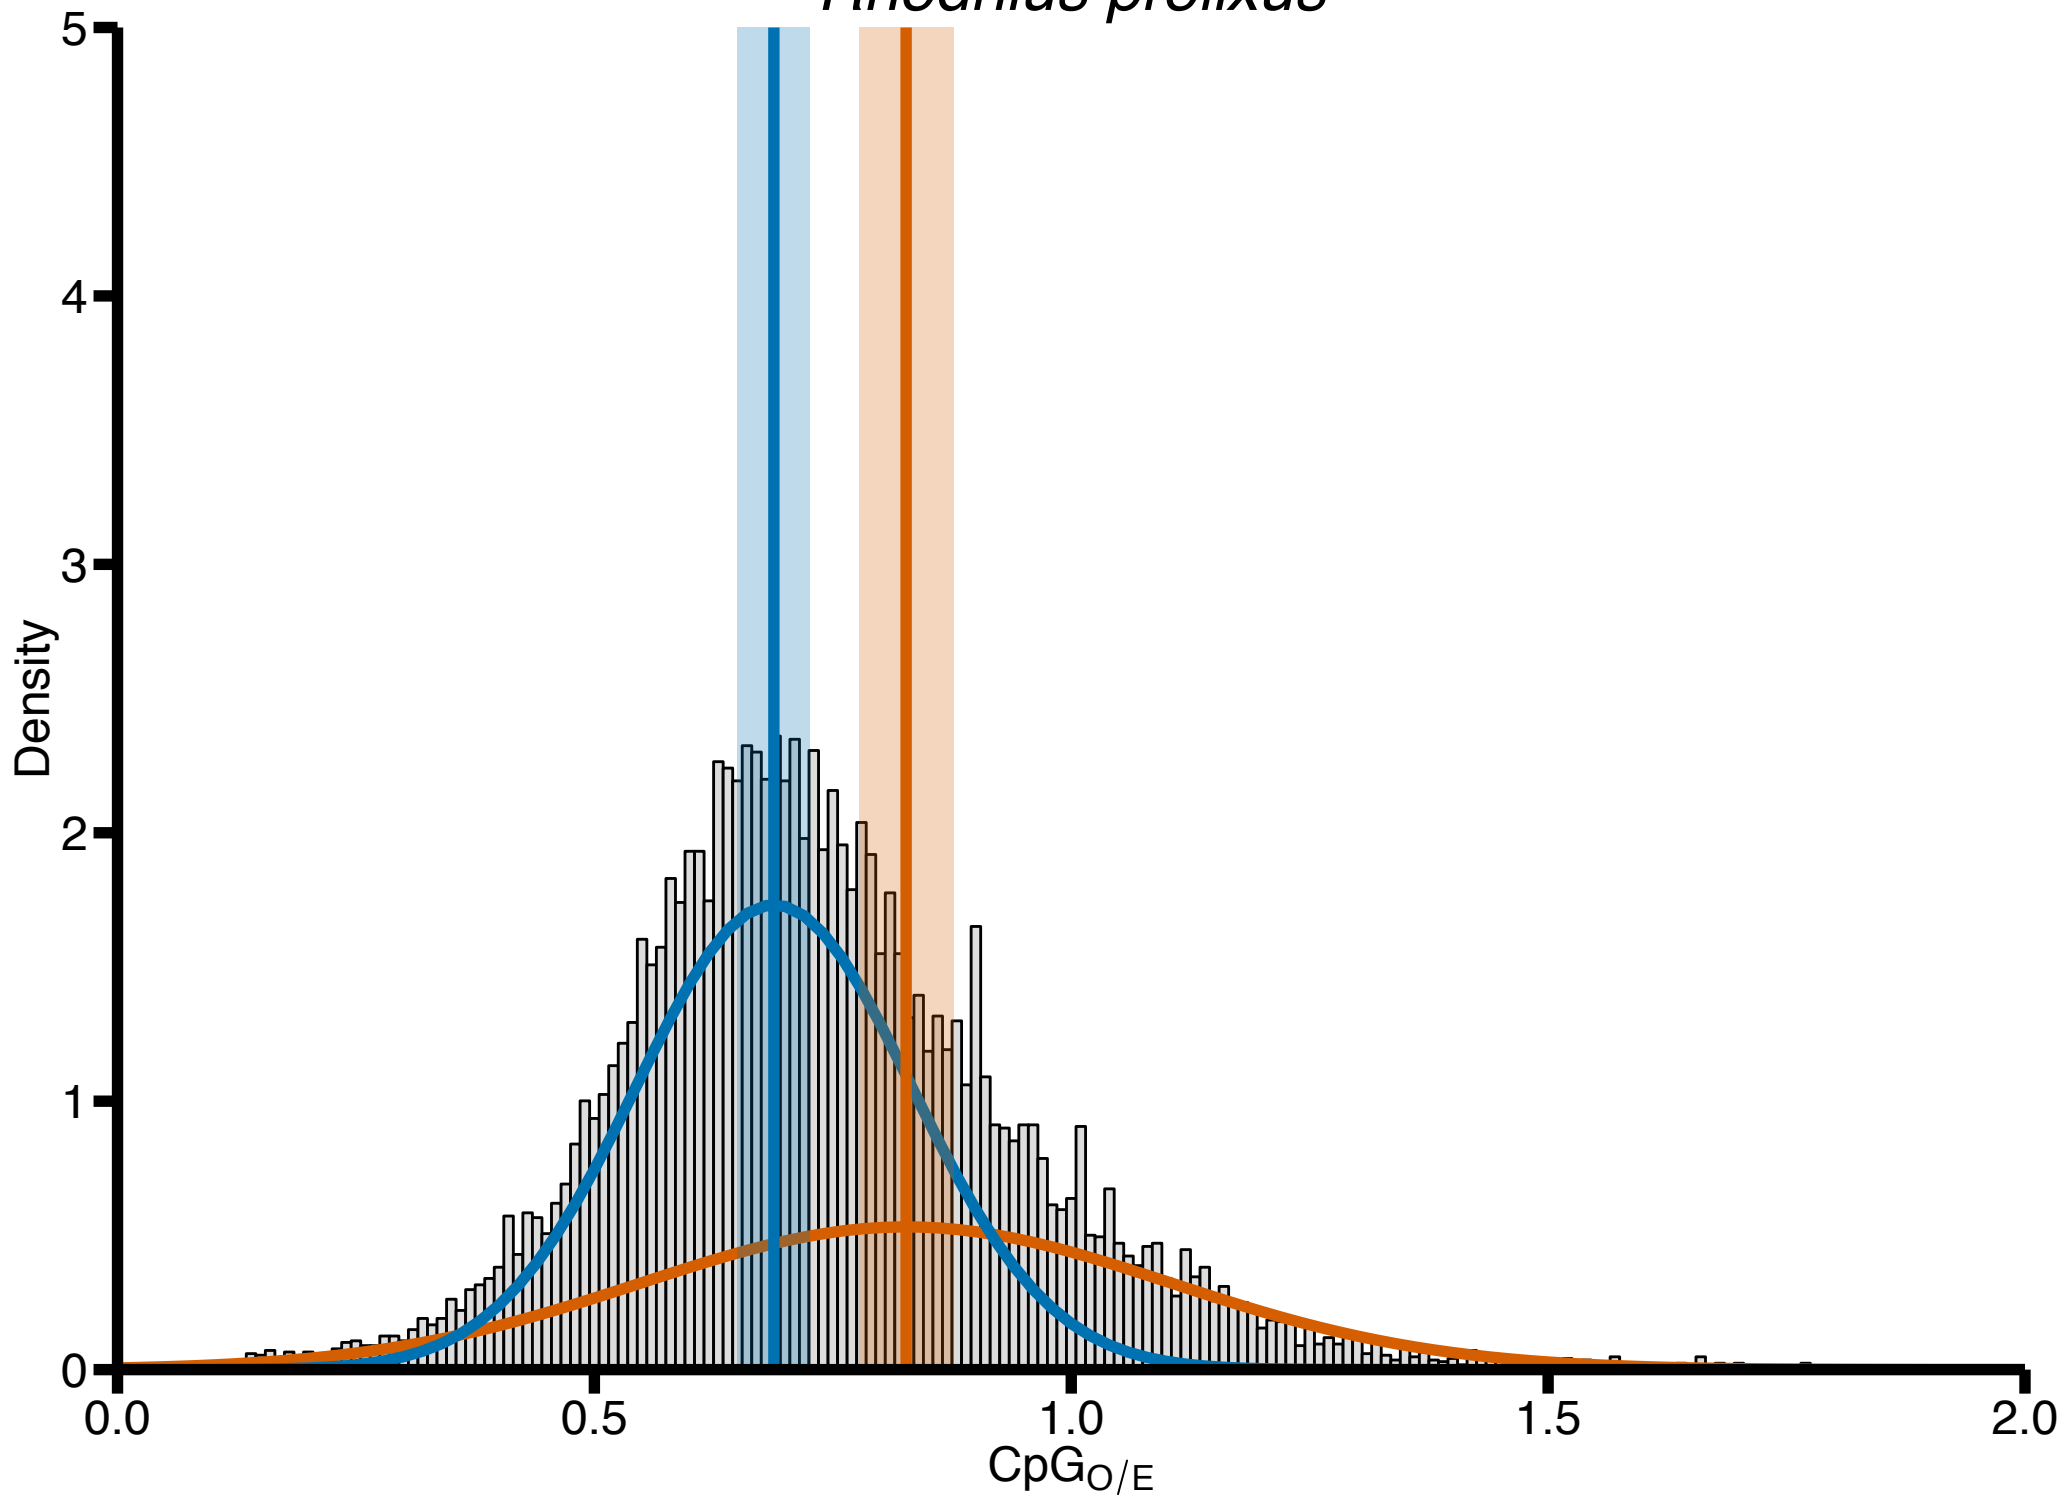

*Acromyrmex echinator*

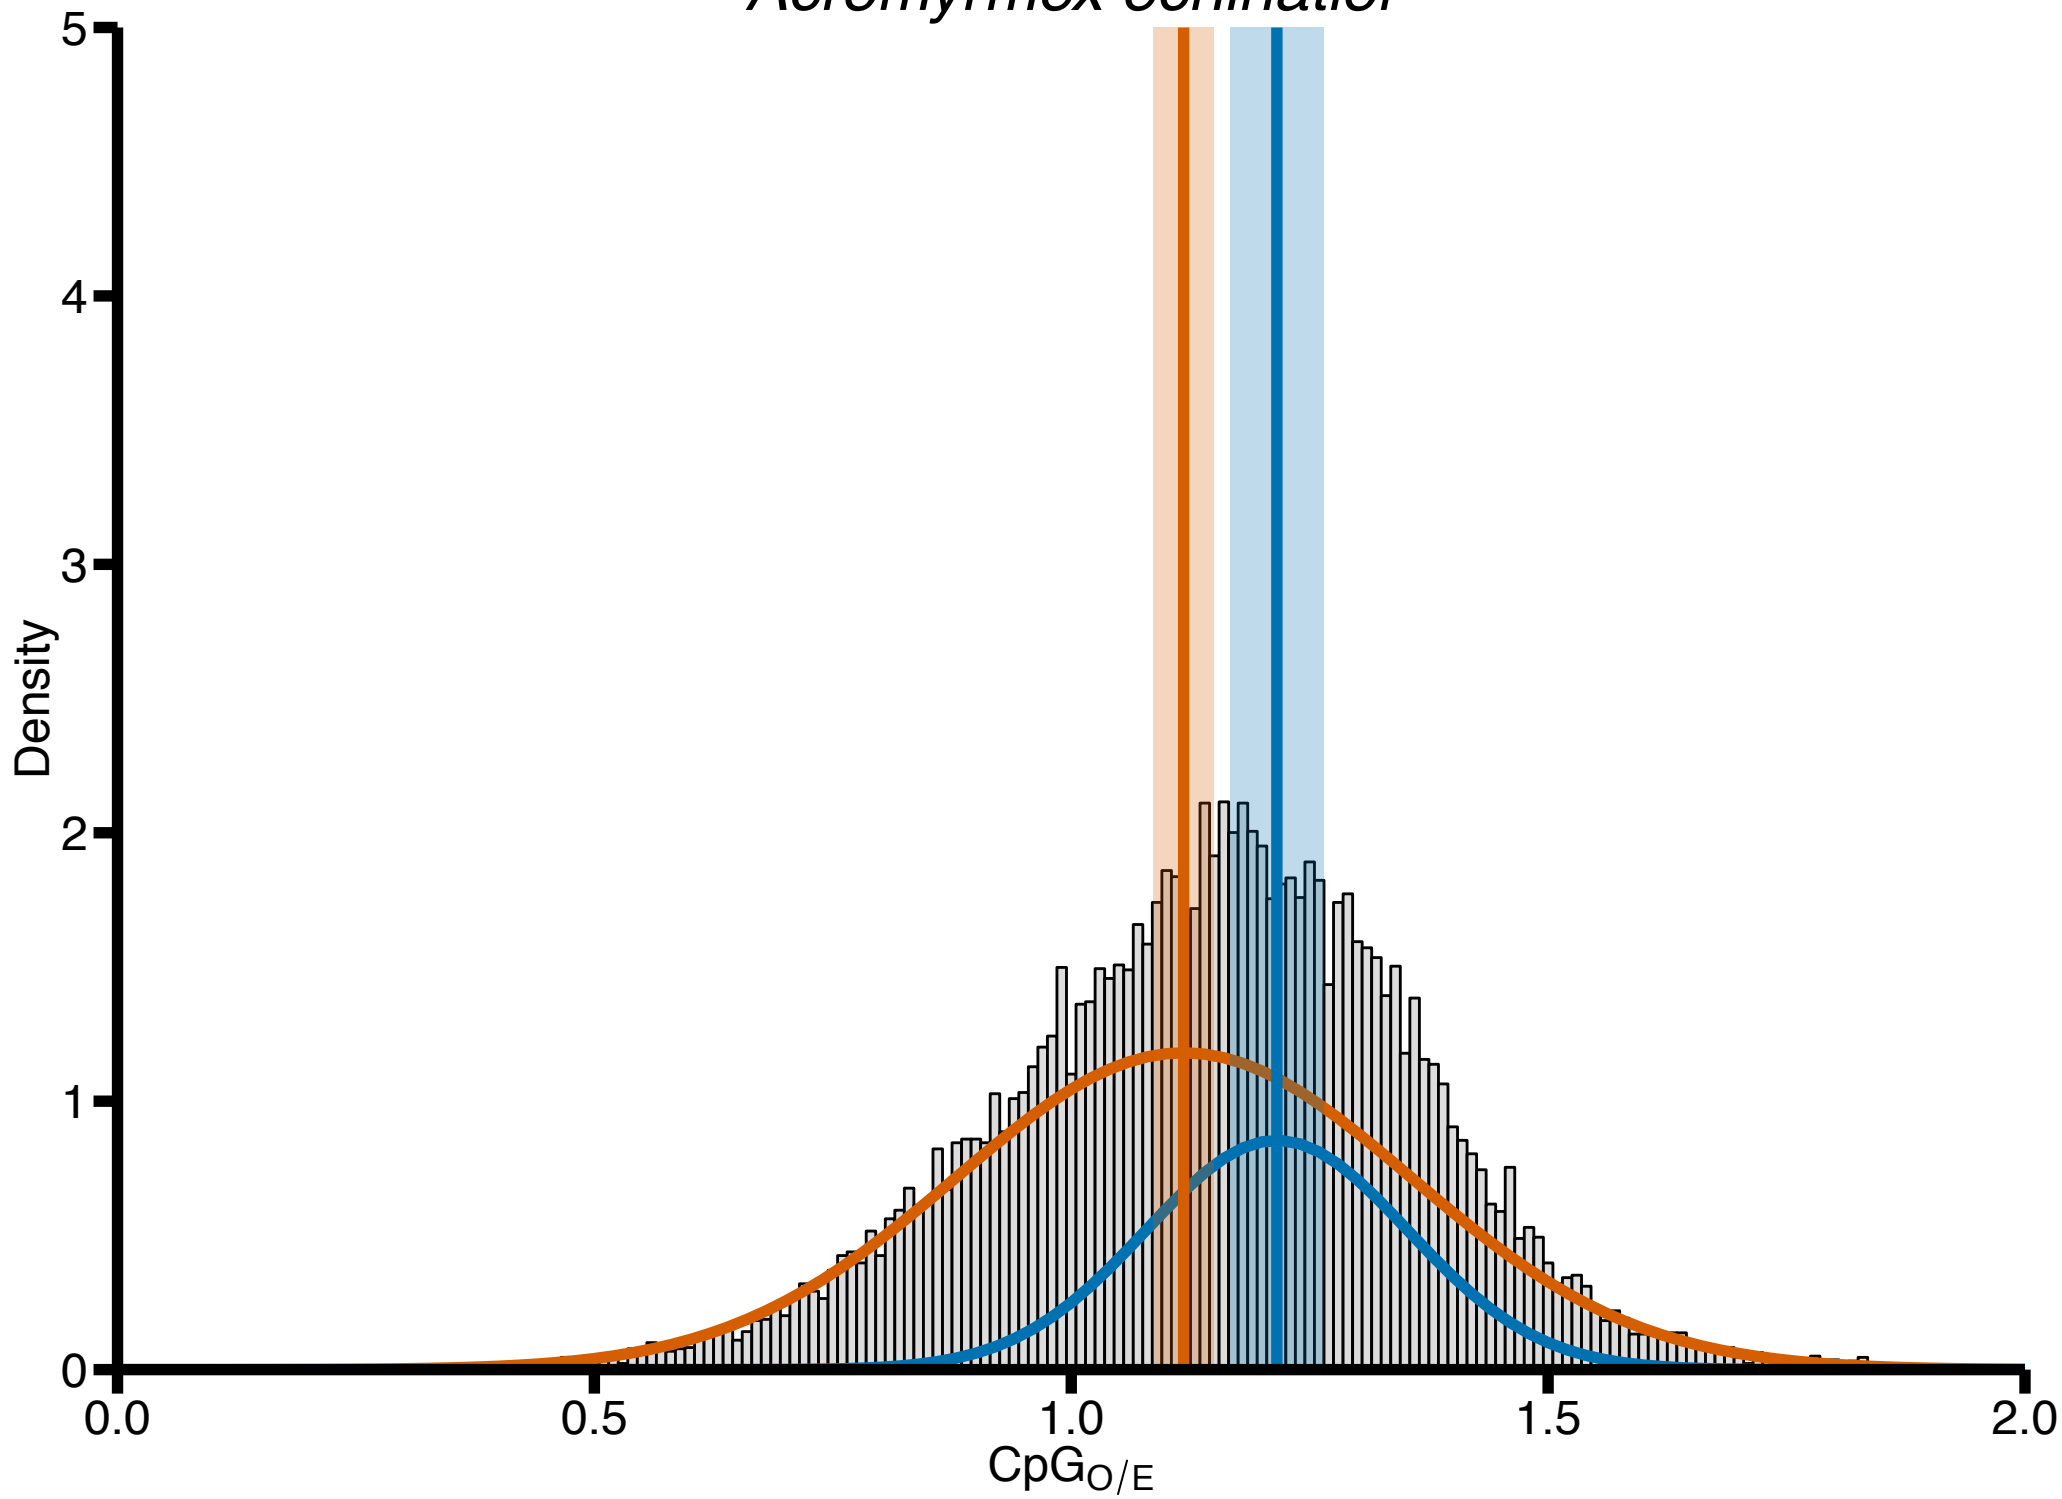

*Apis dorsata*

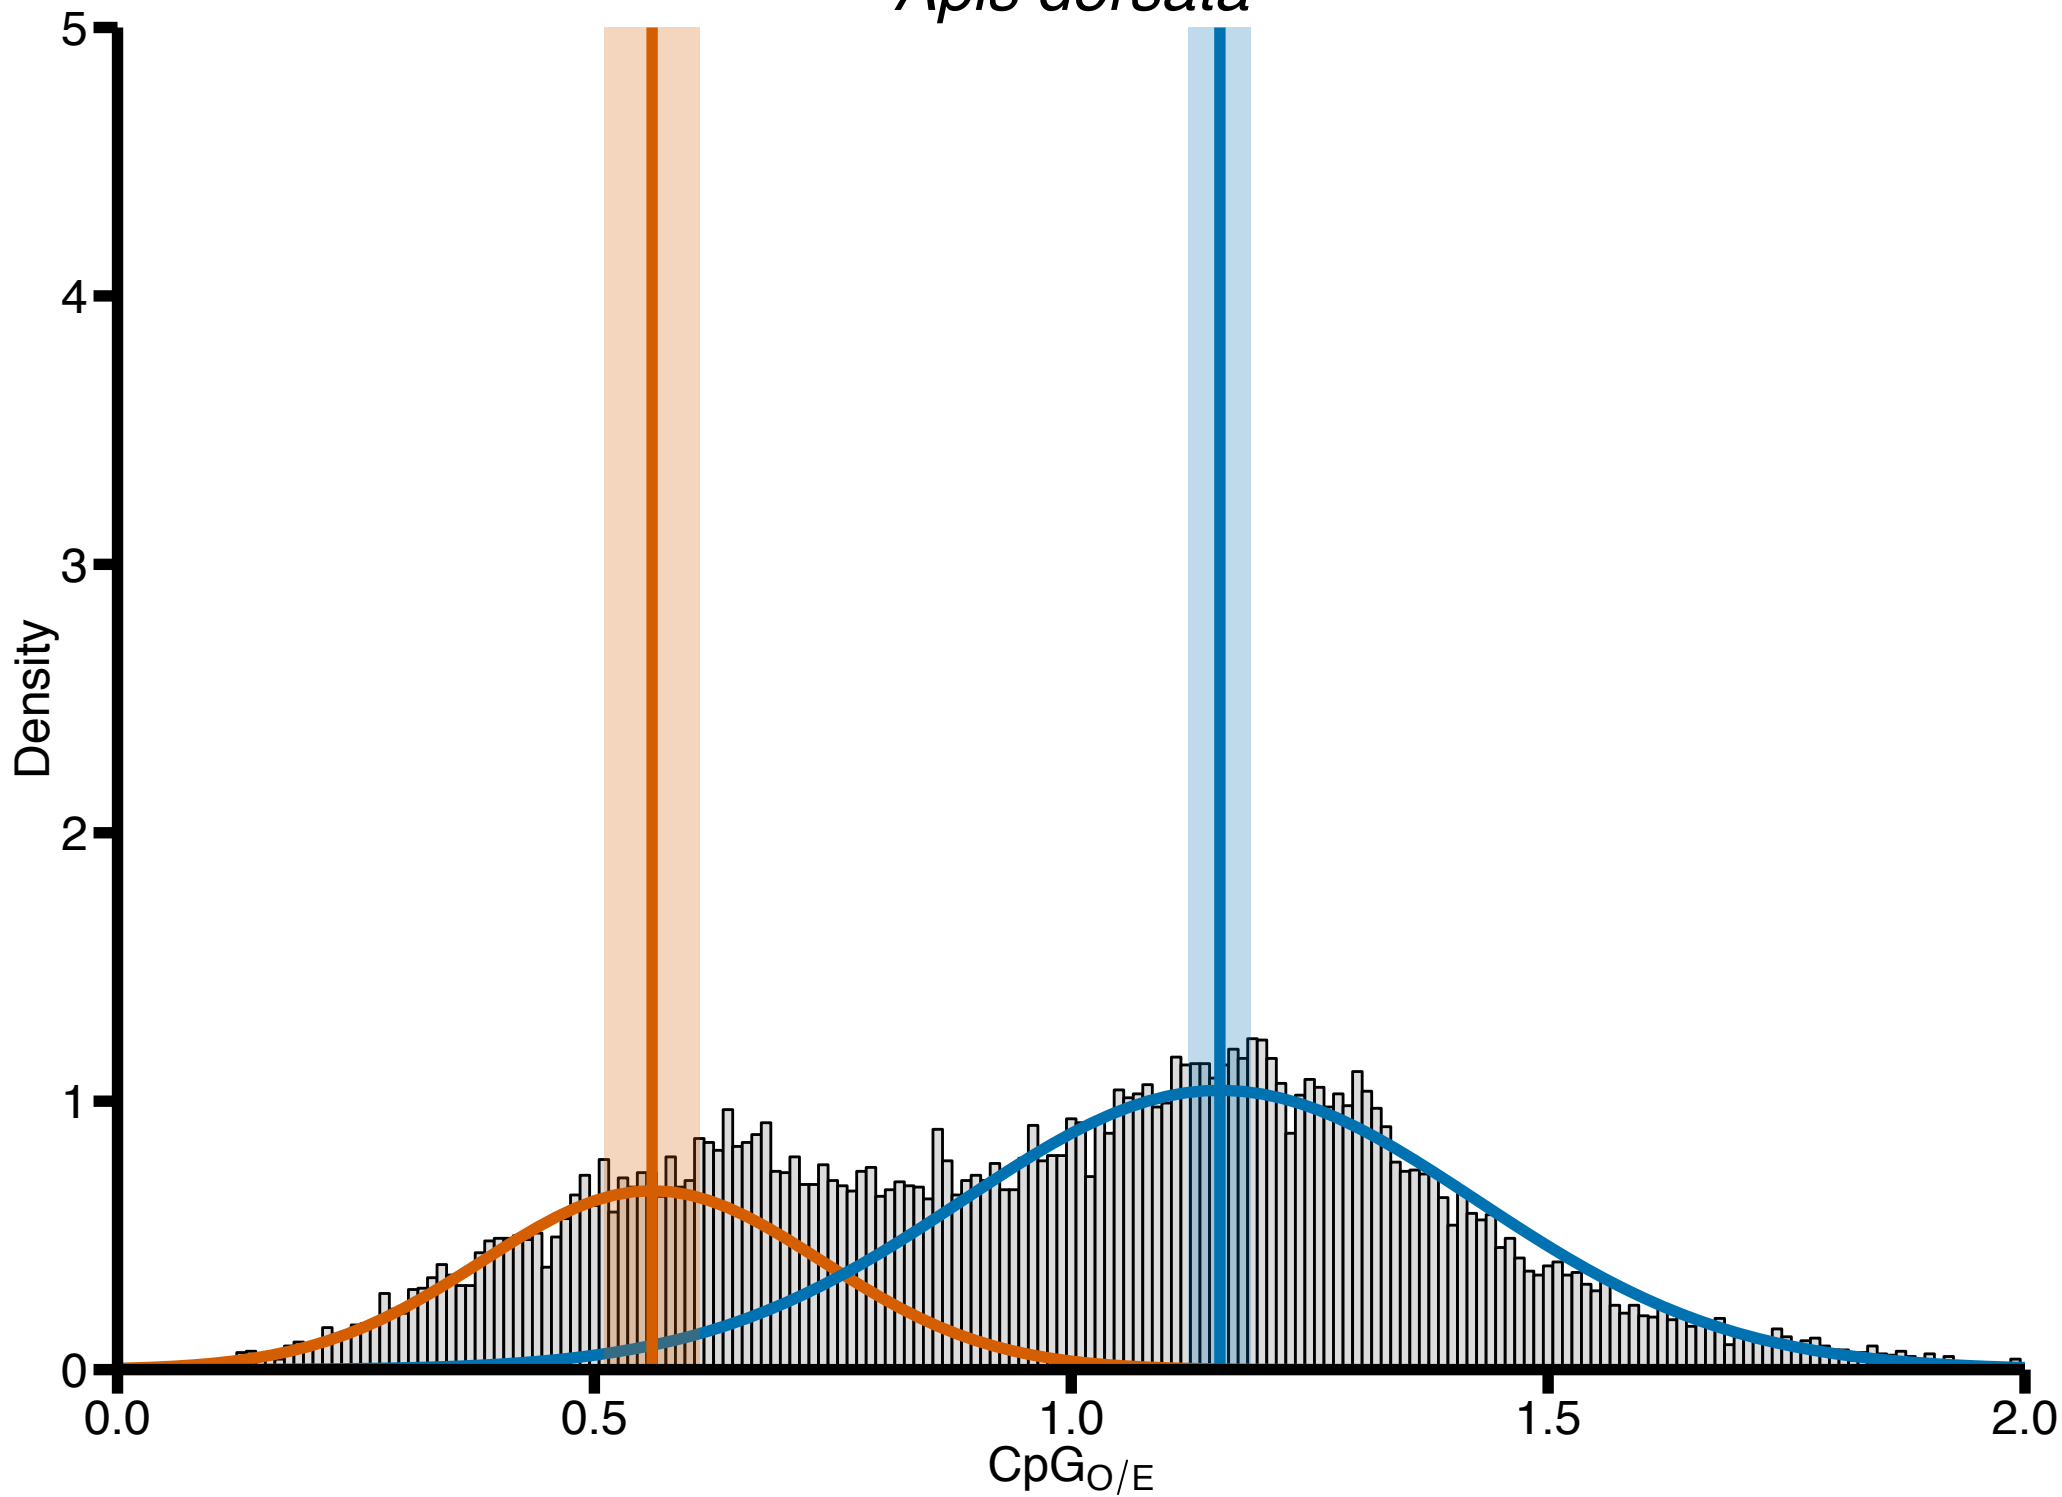

*Apis florea*

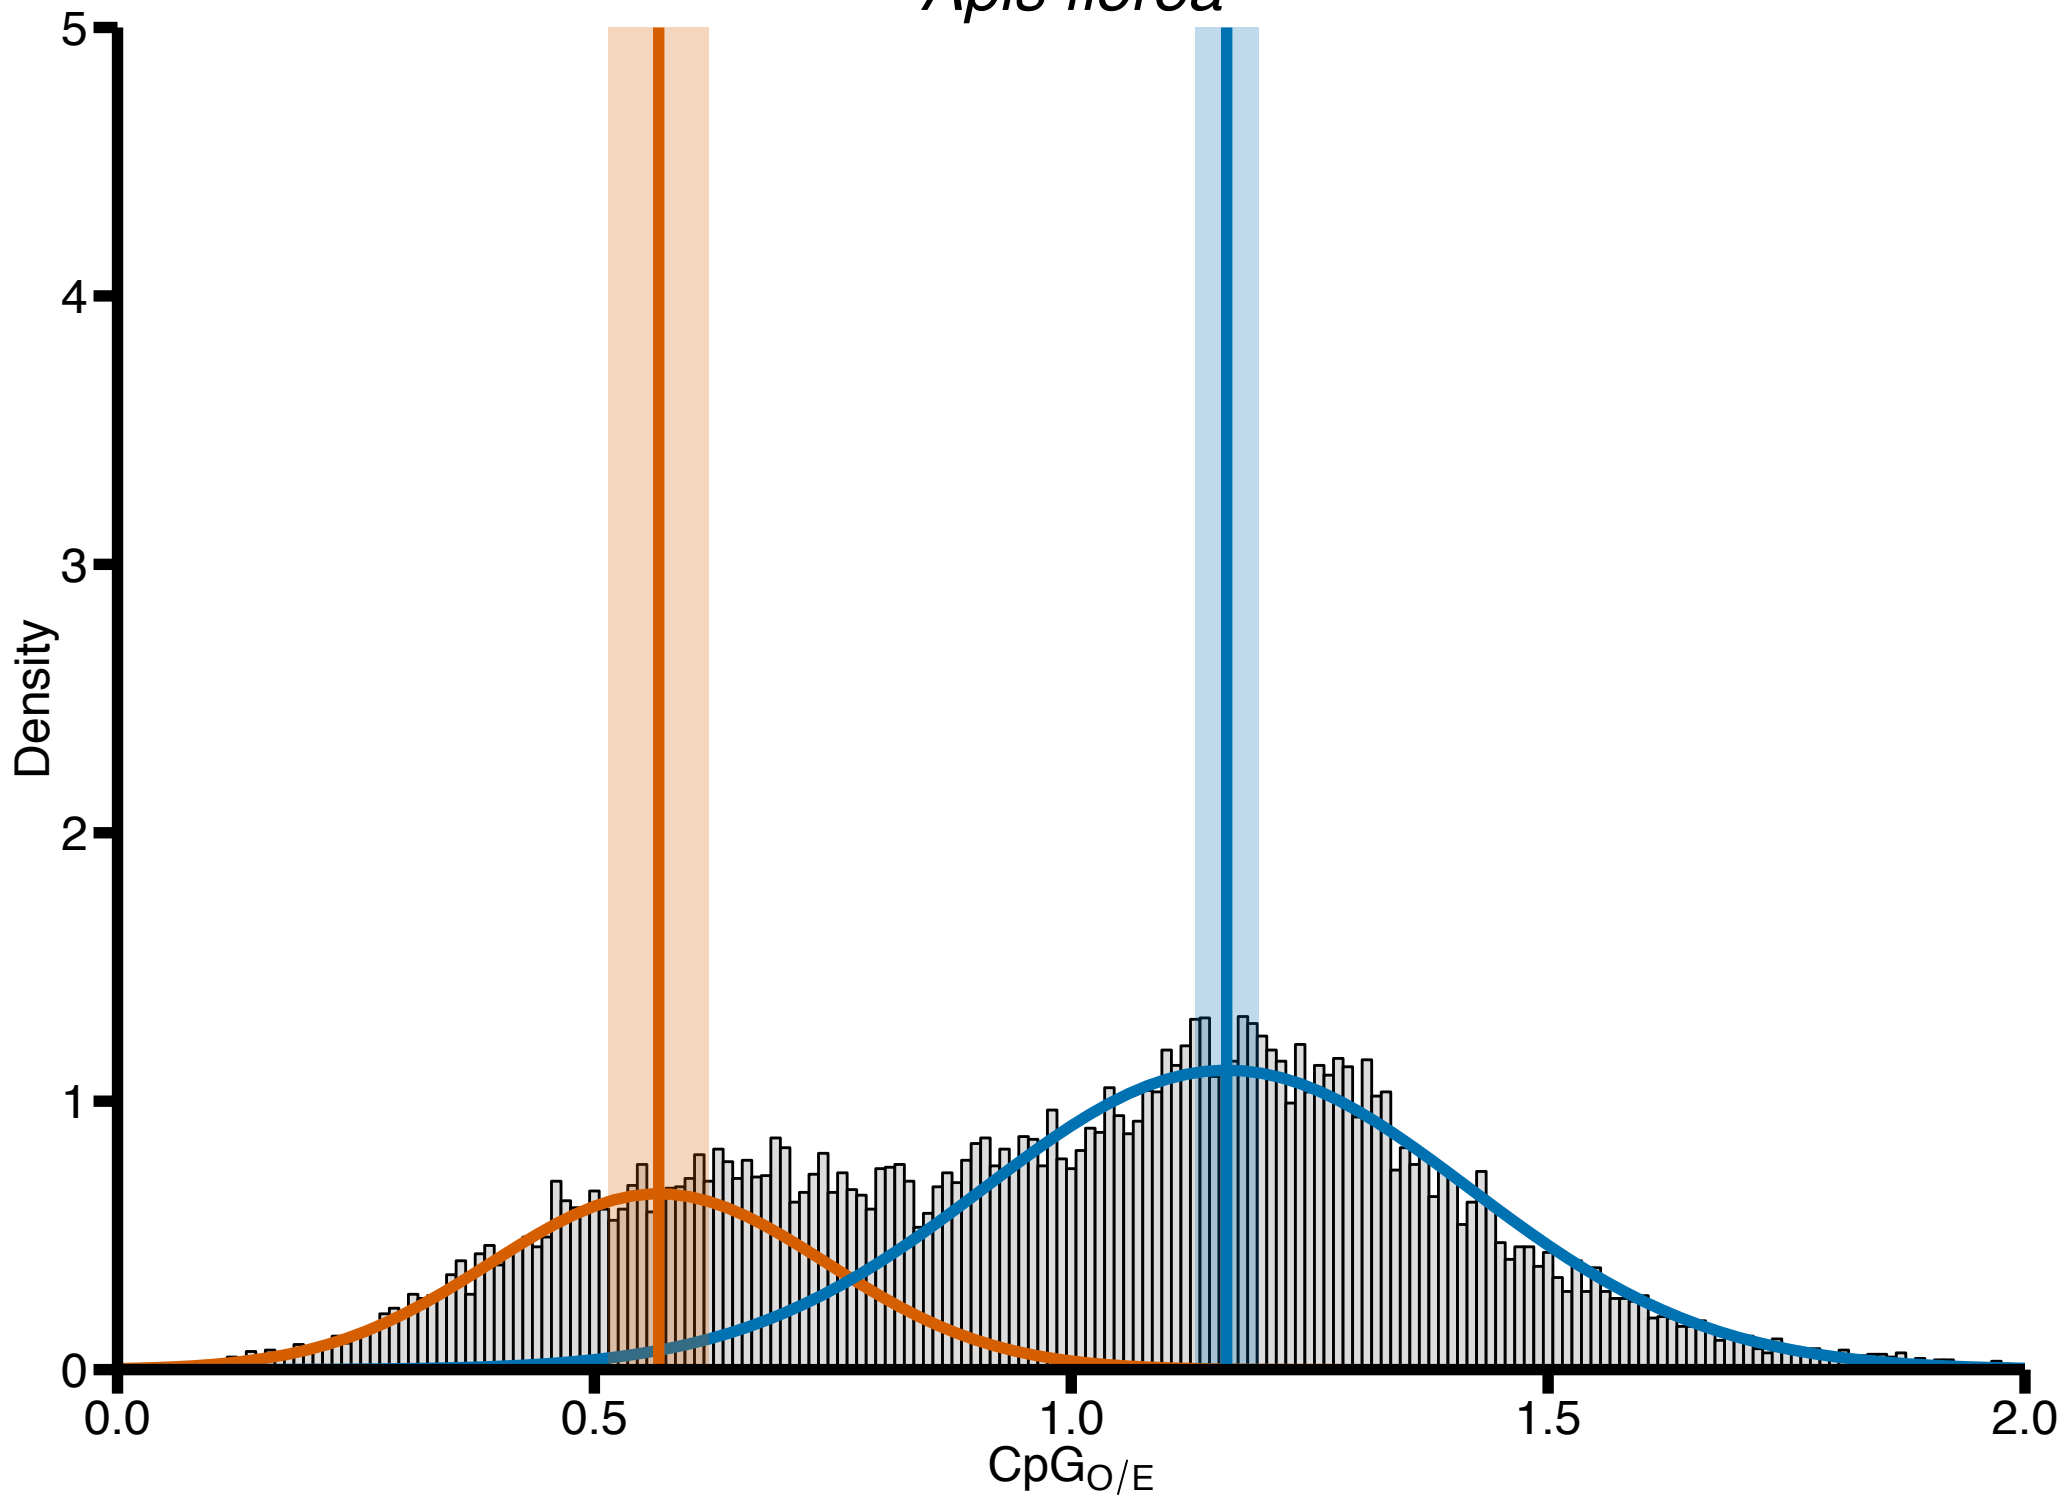



*Apis mellifera*

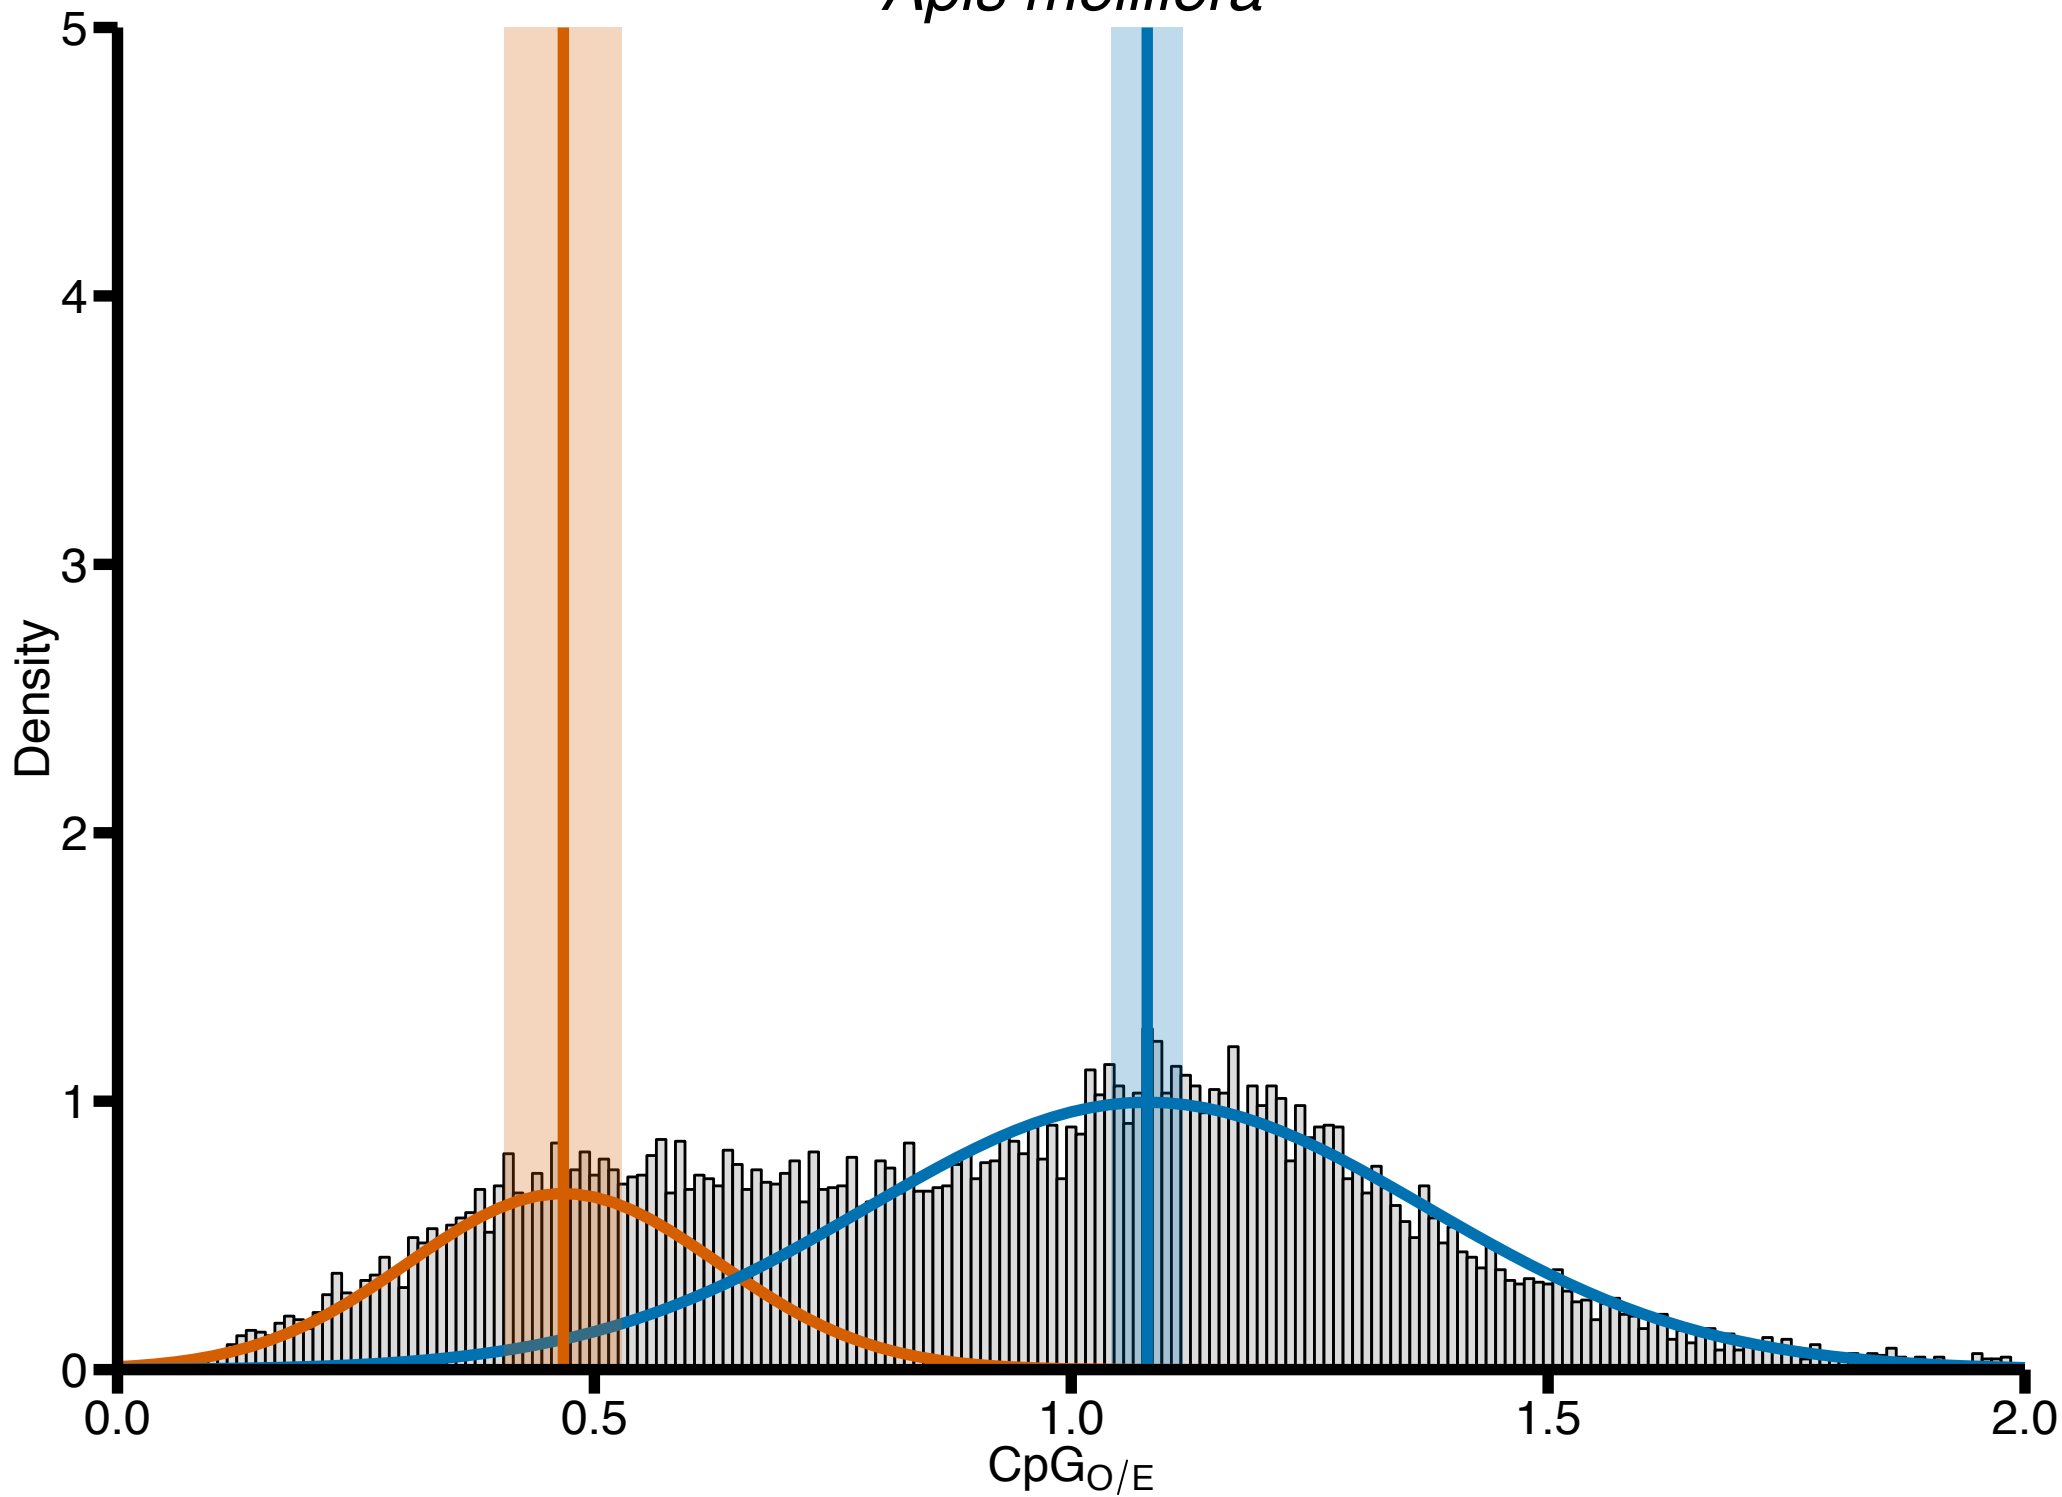

*Athalia rosae*

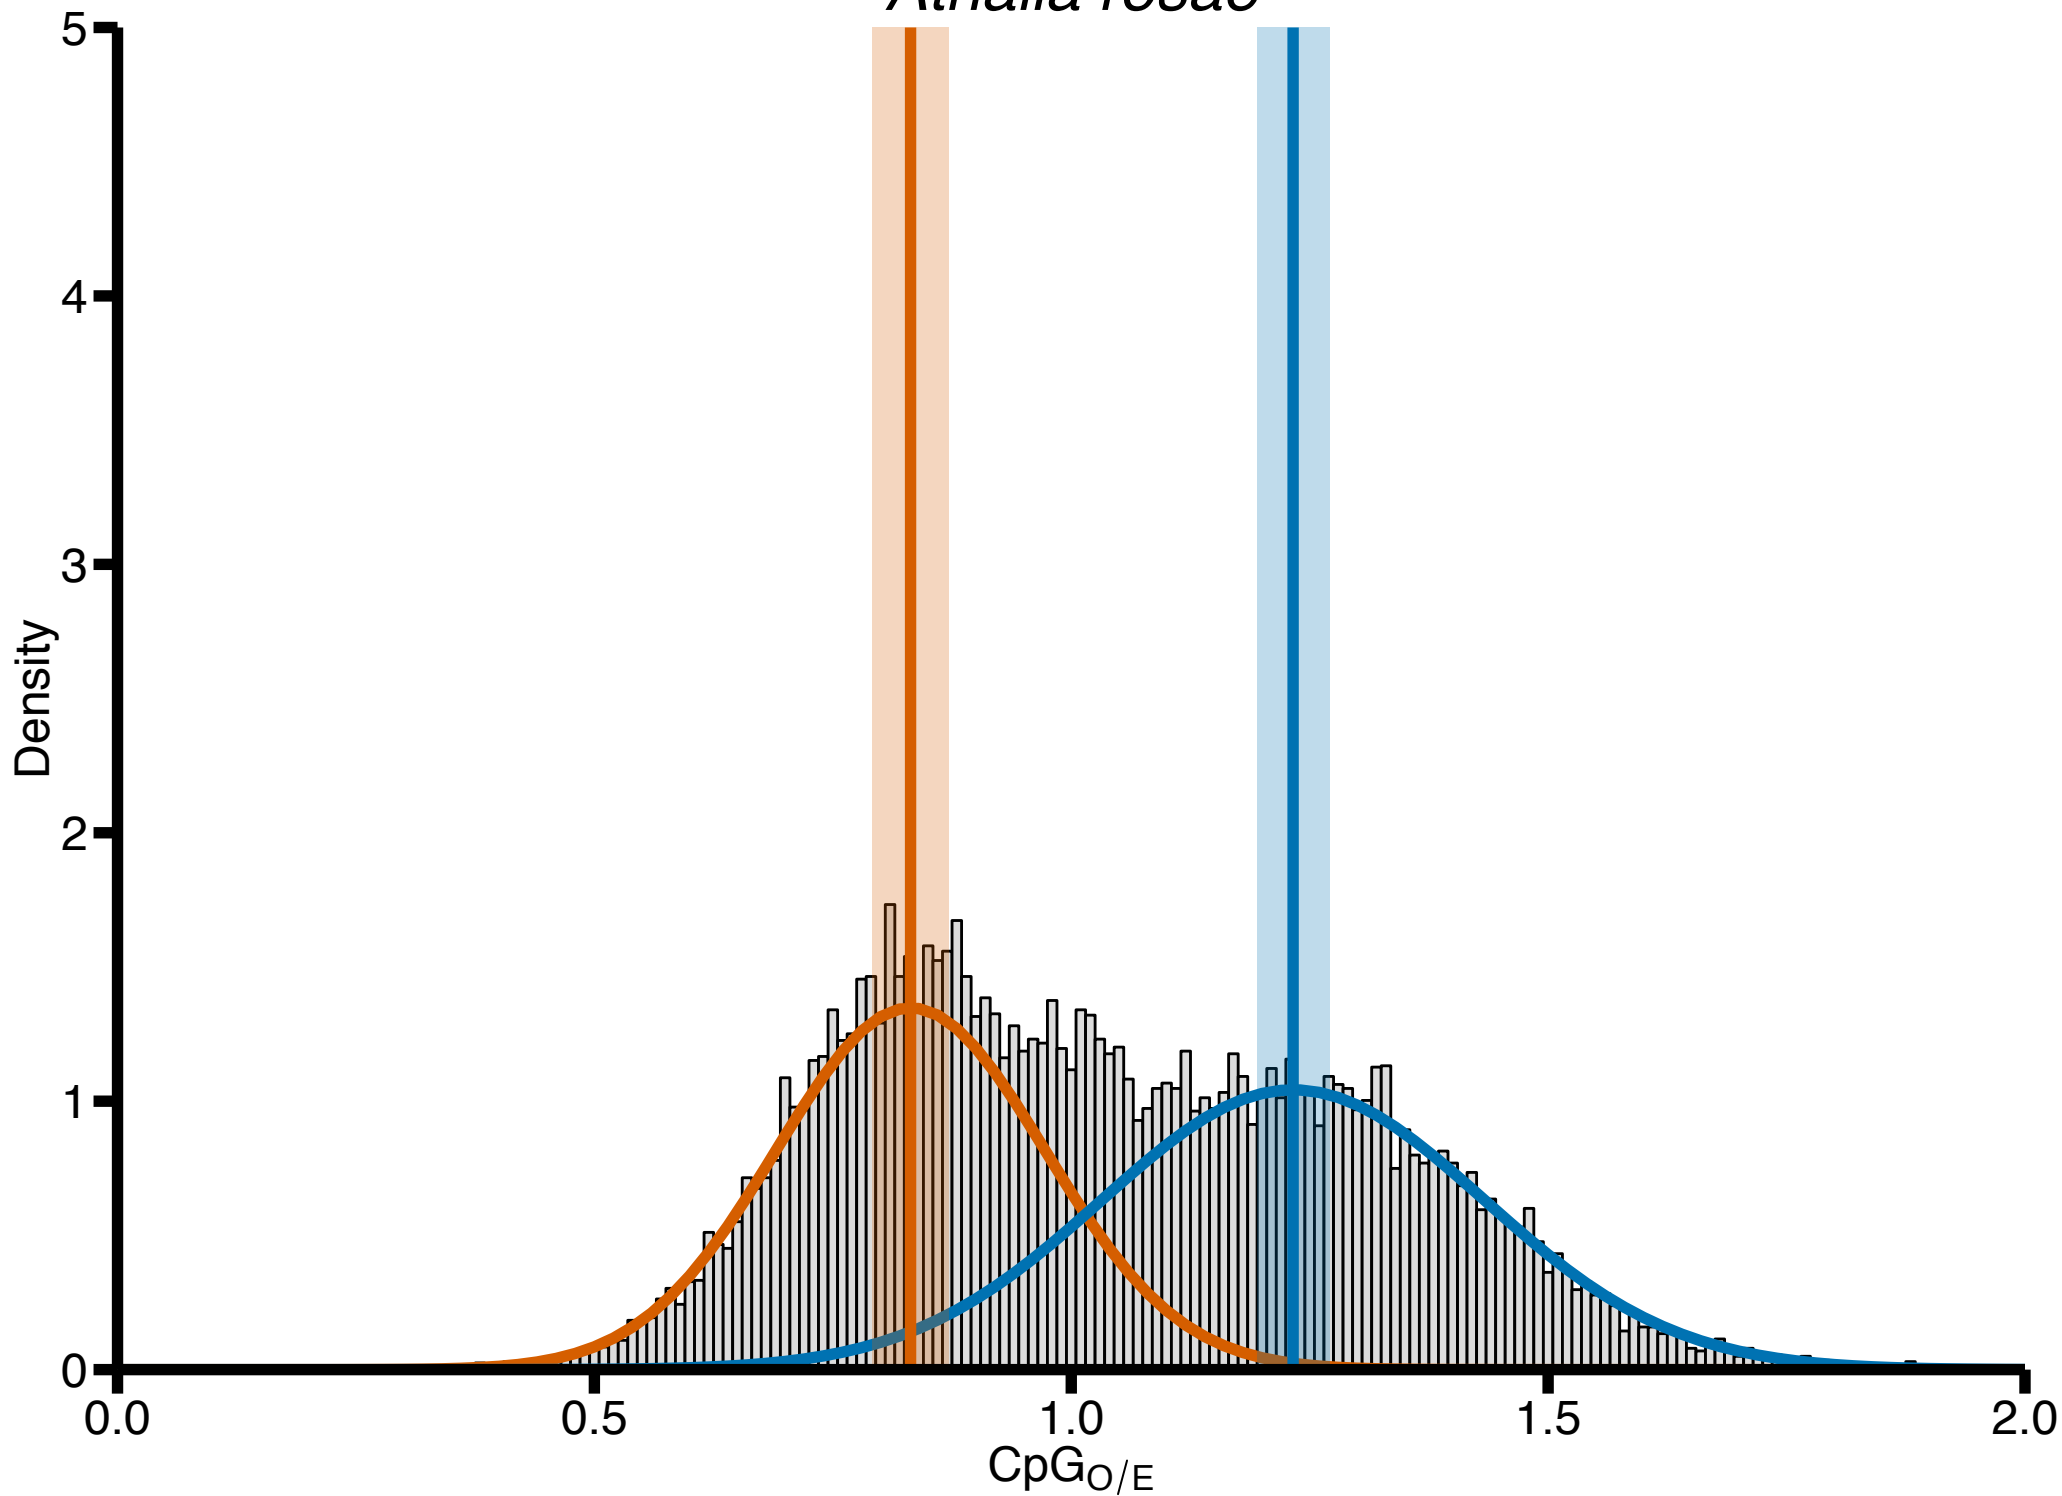

*Atta cephalotes*

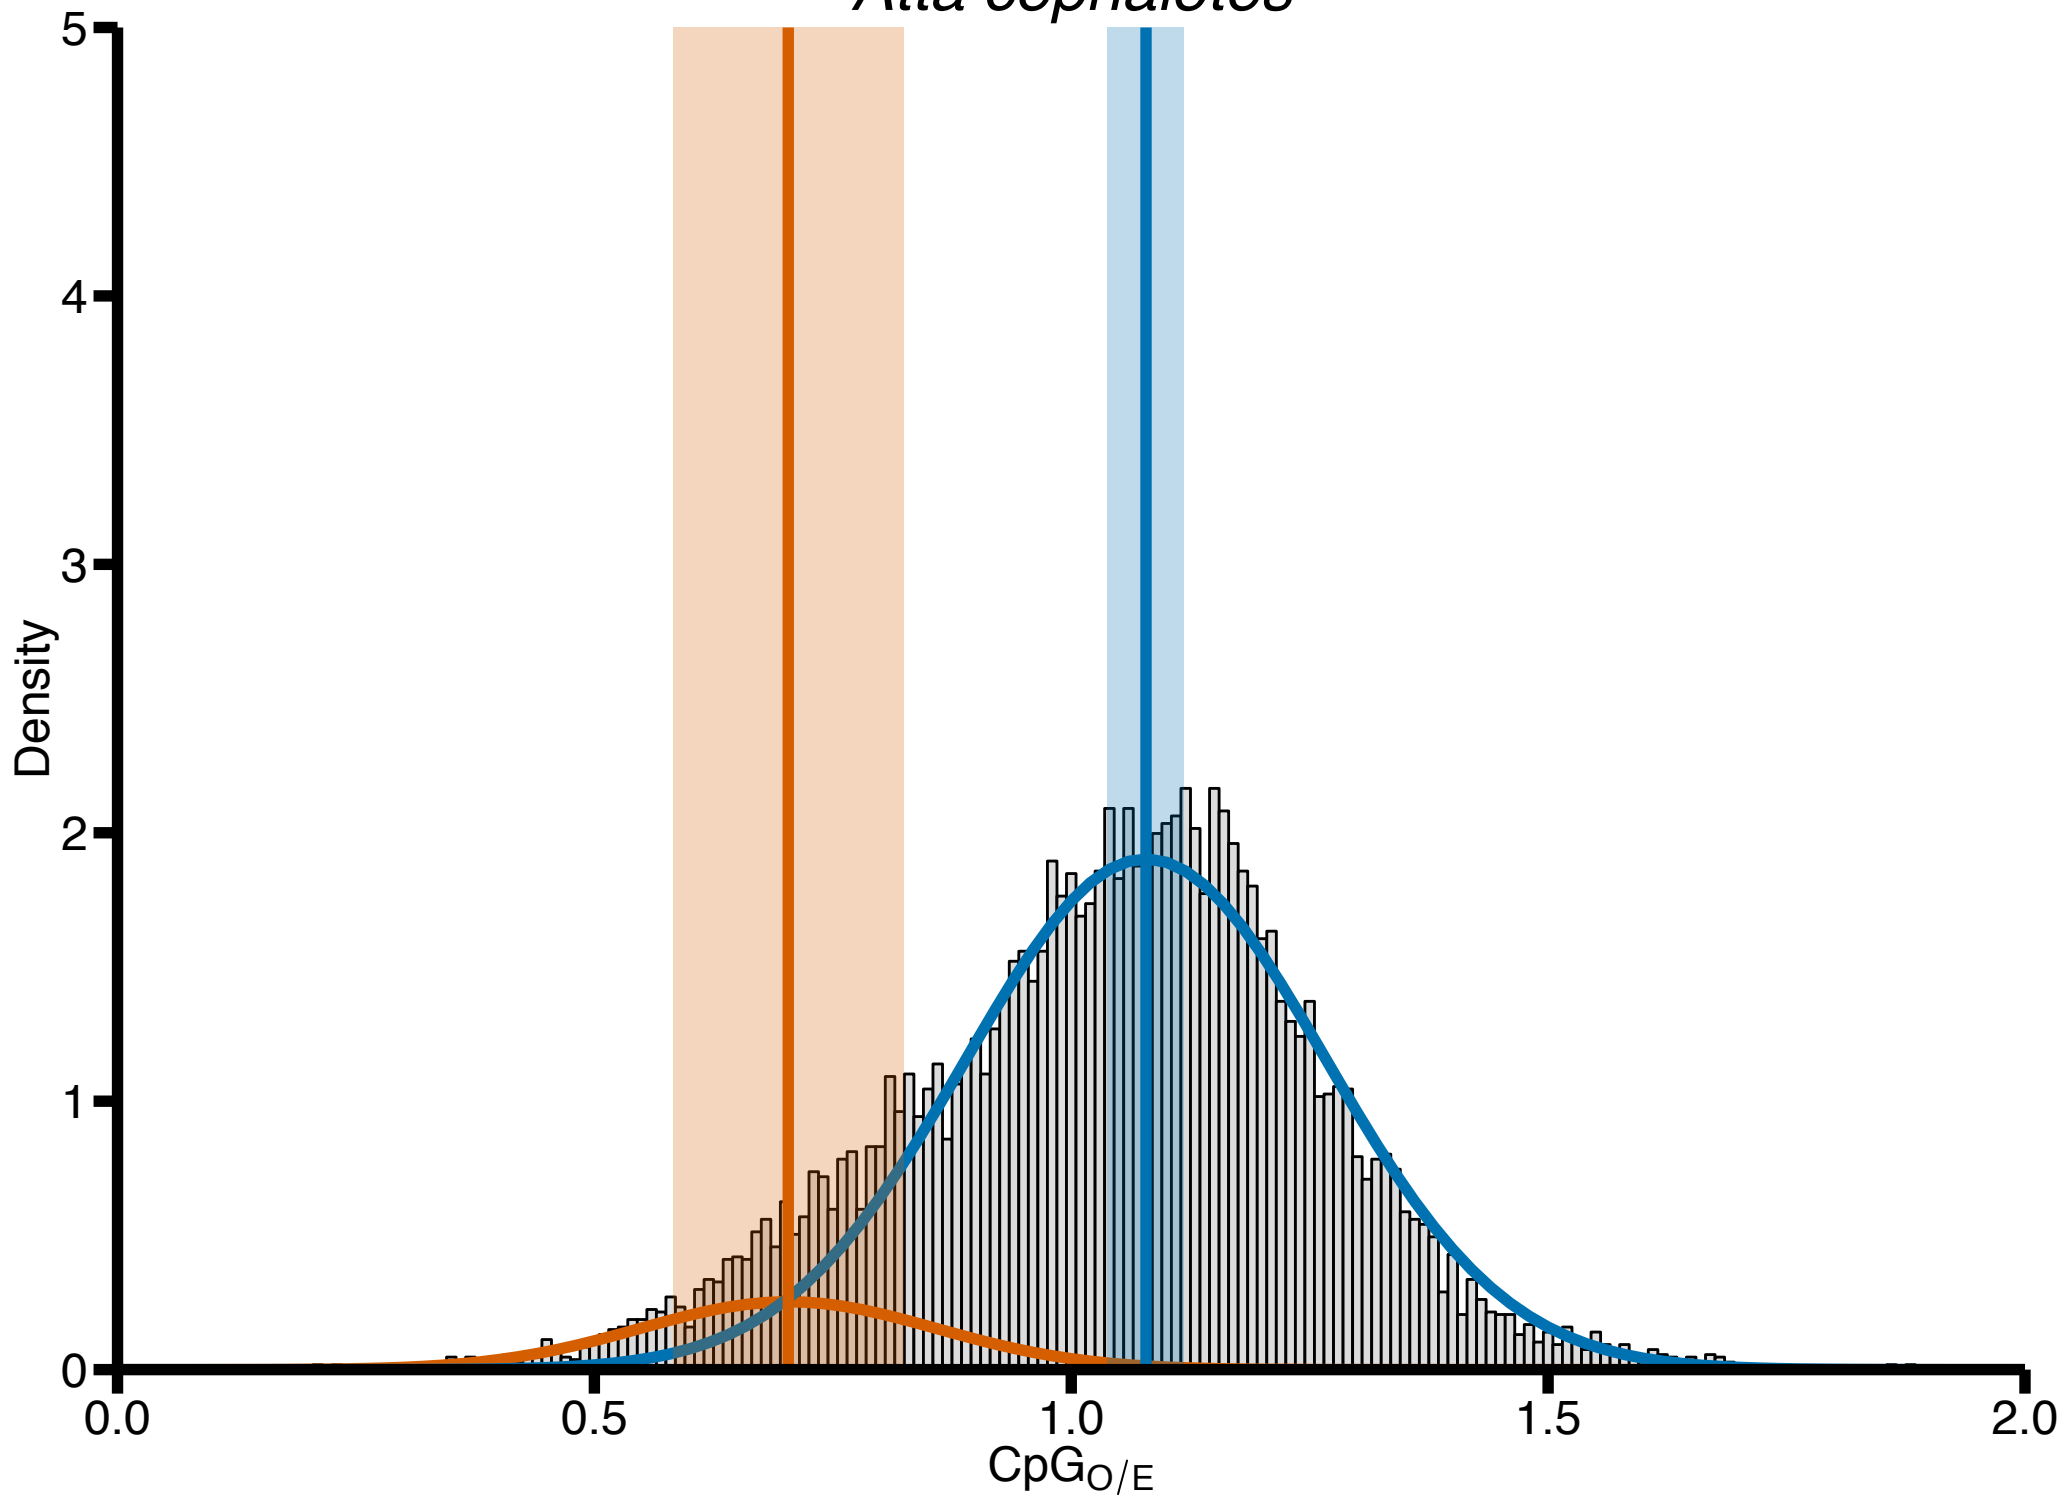

*Bombus impatiens*

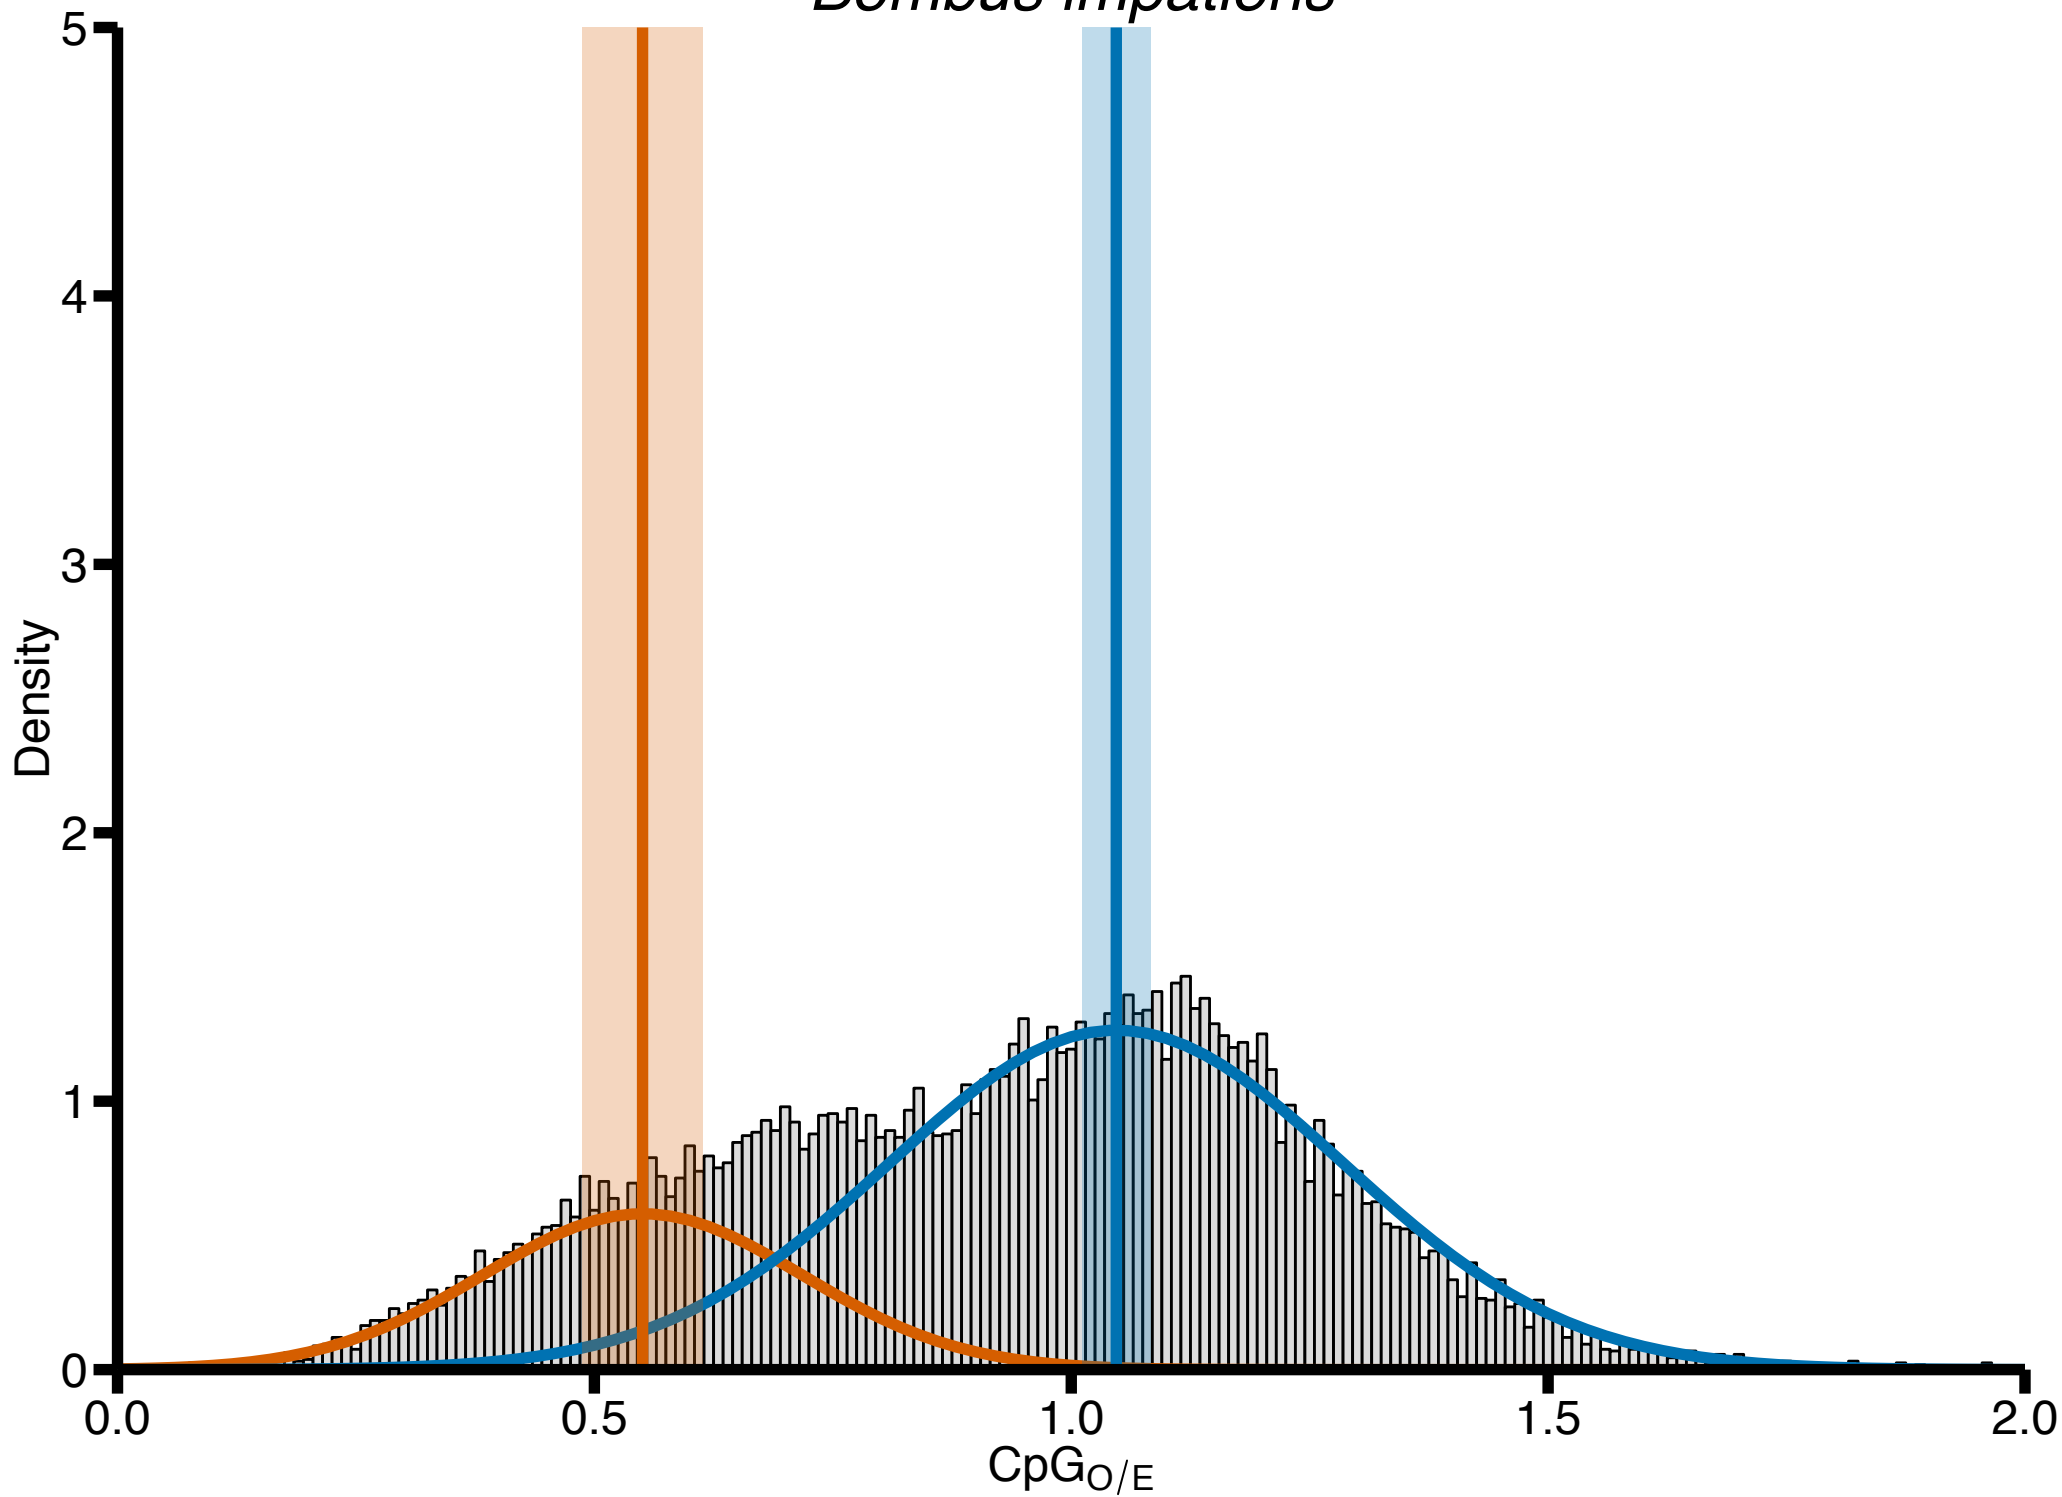

*Bombus terrestris*

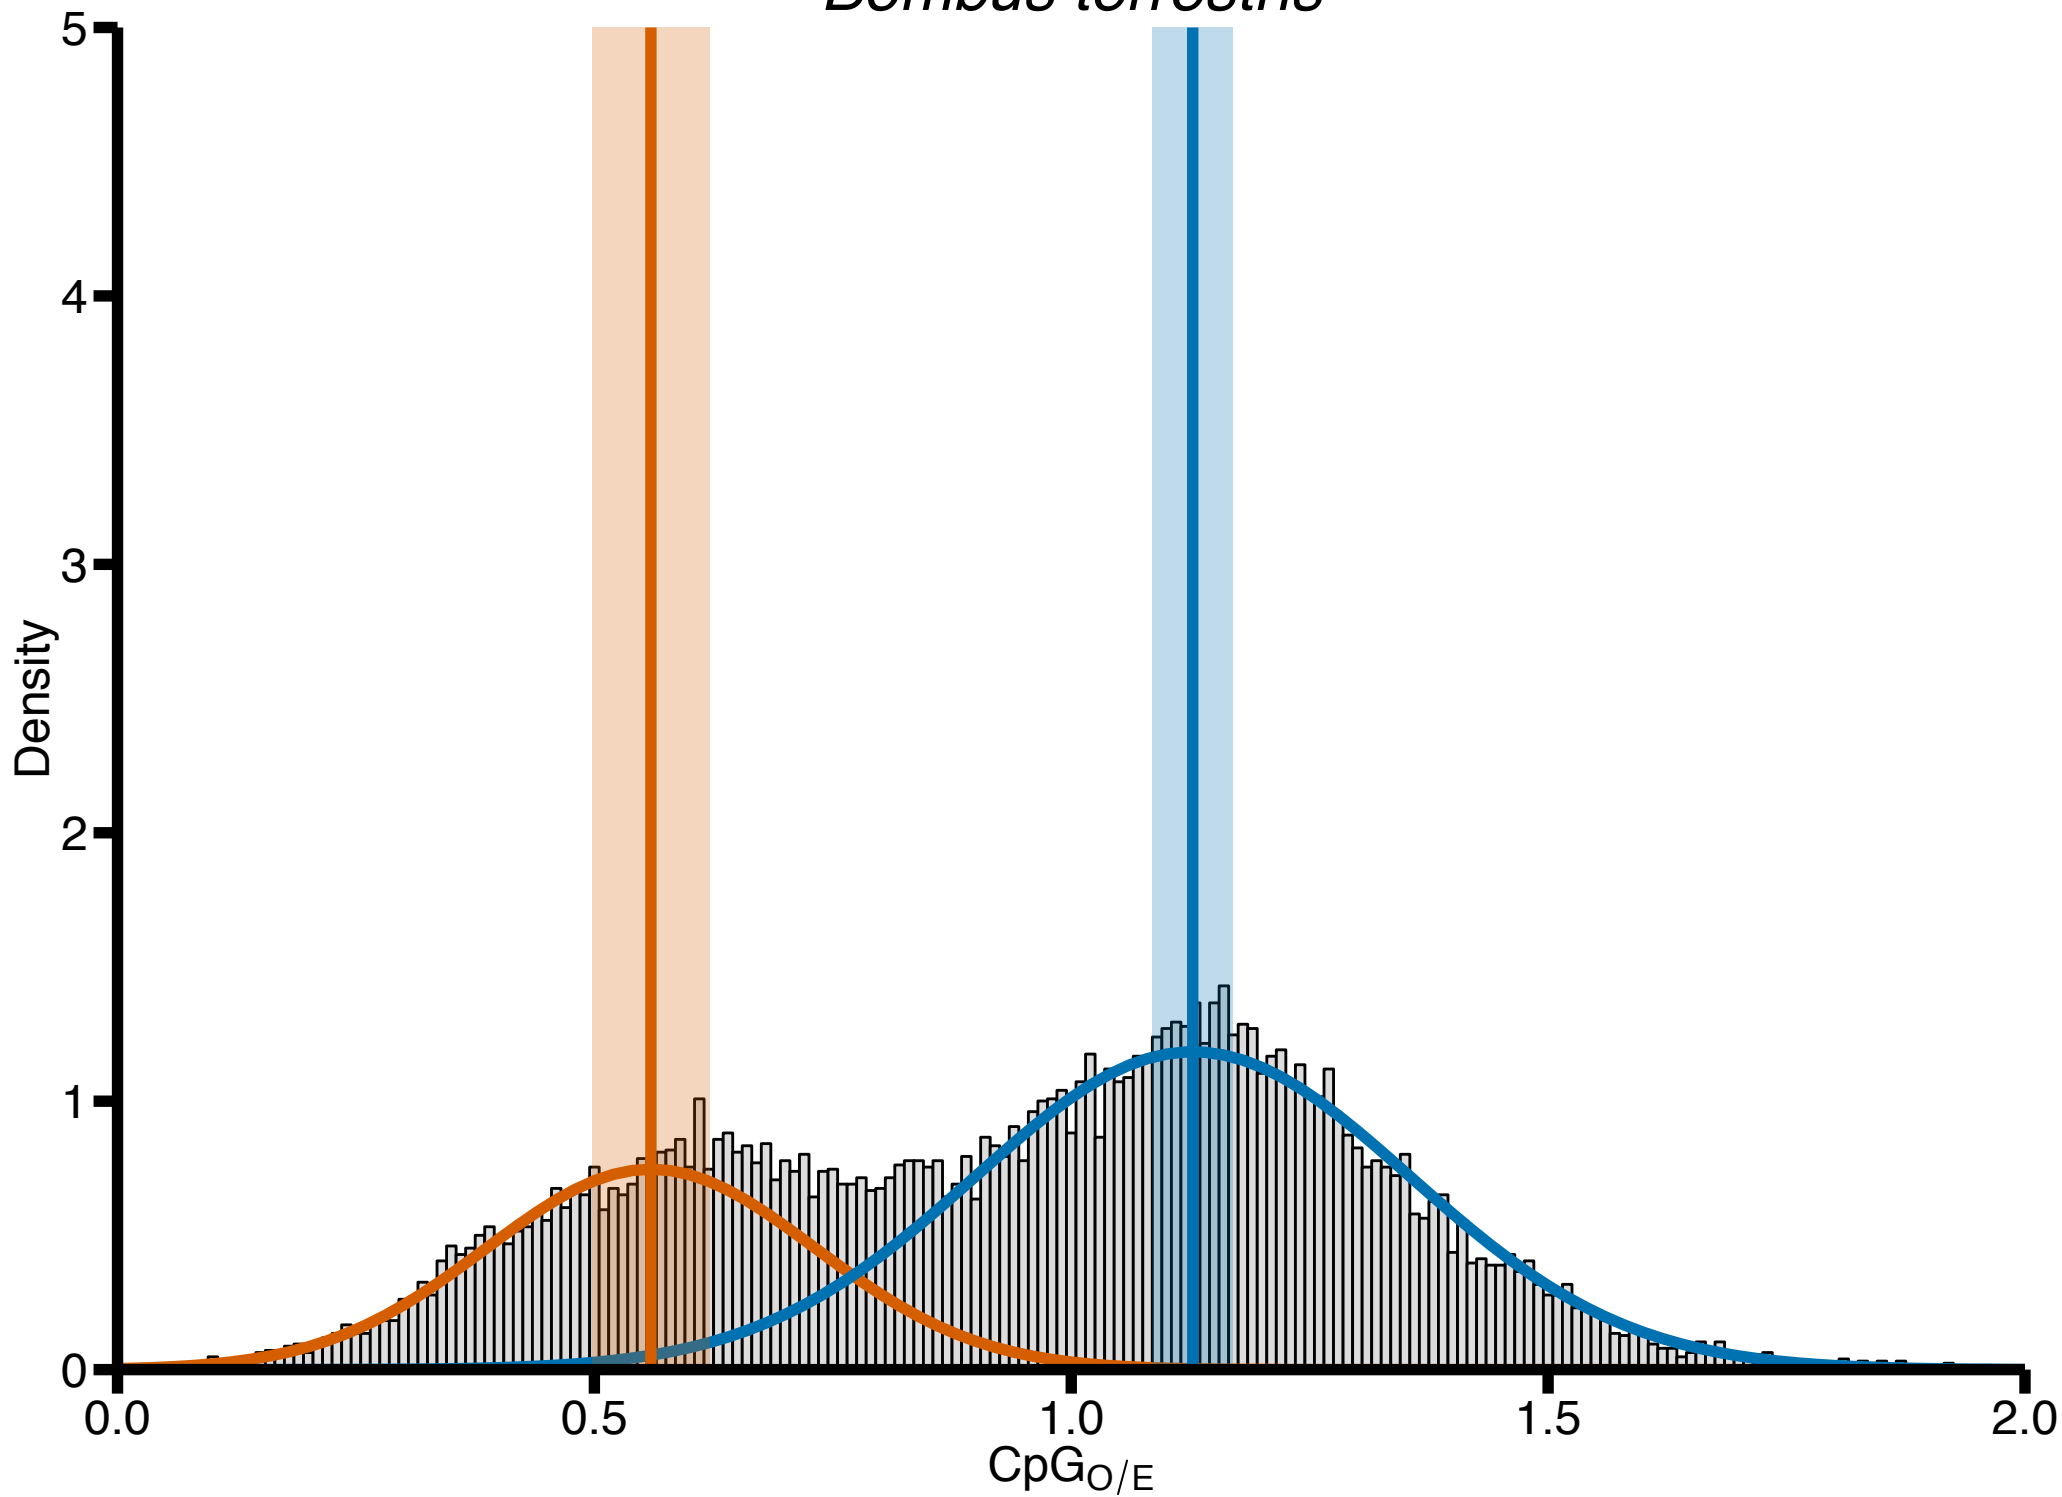

*Camponotus floridanus*

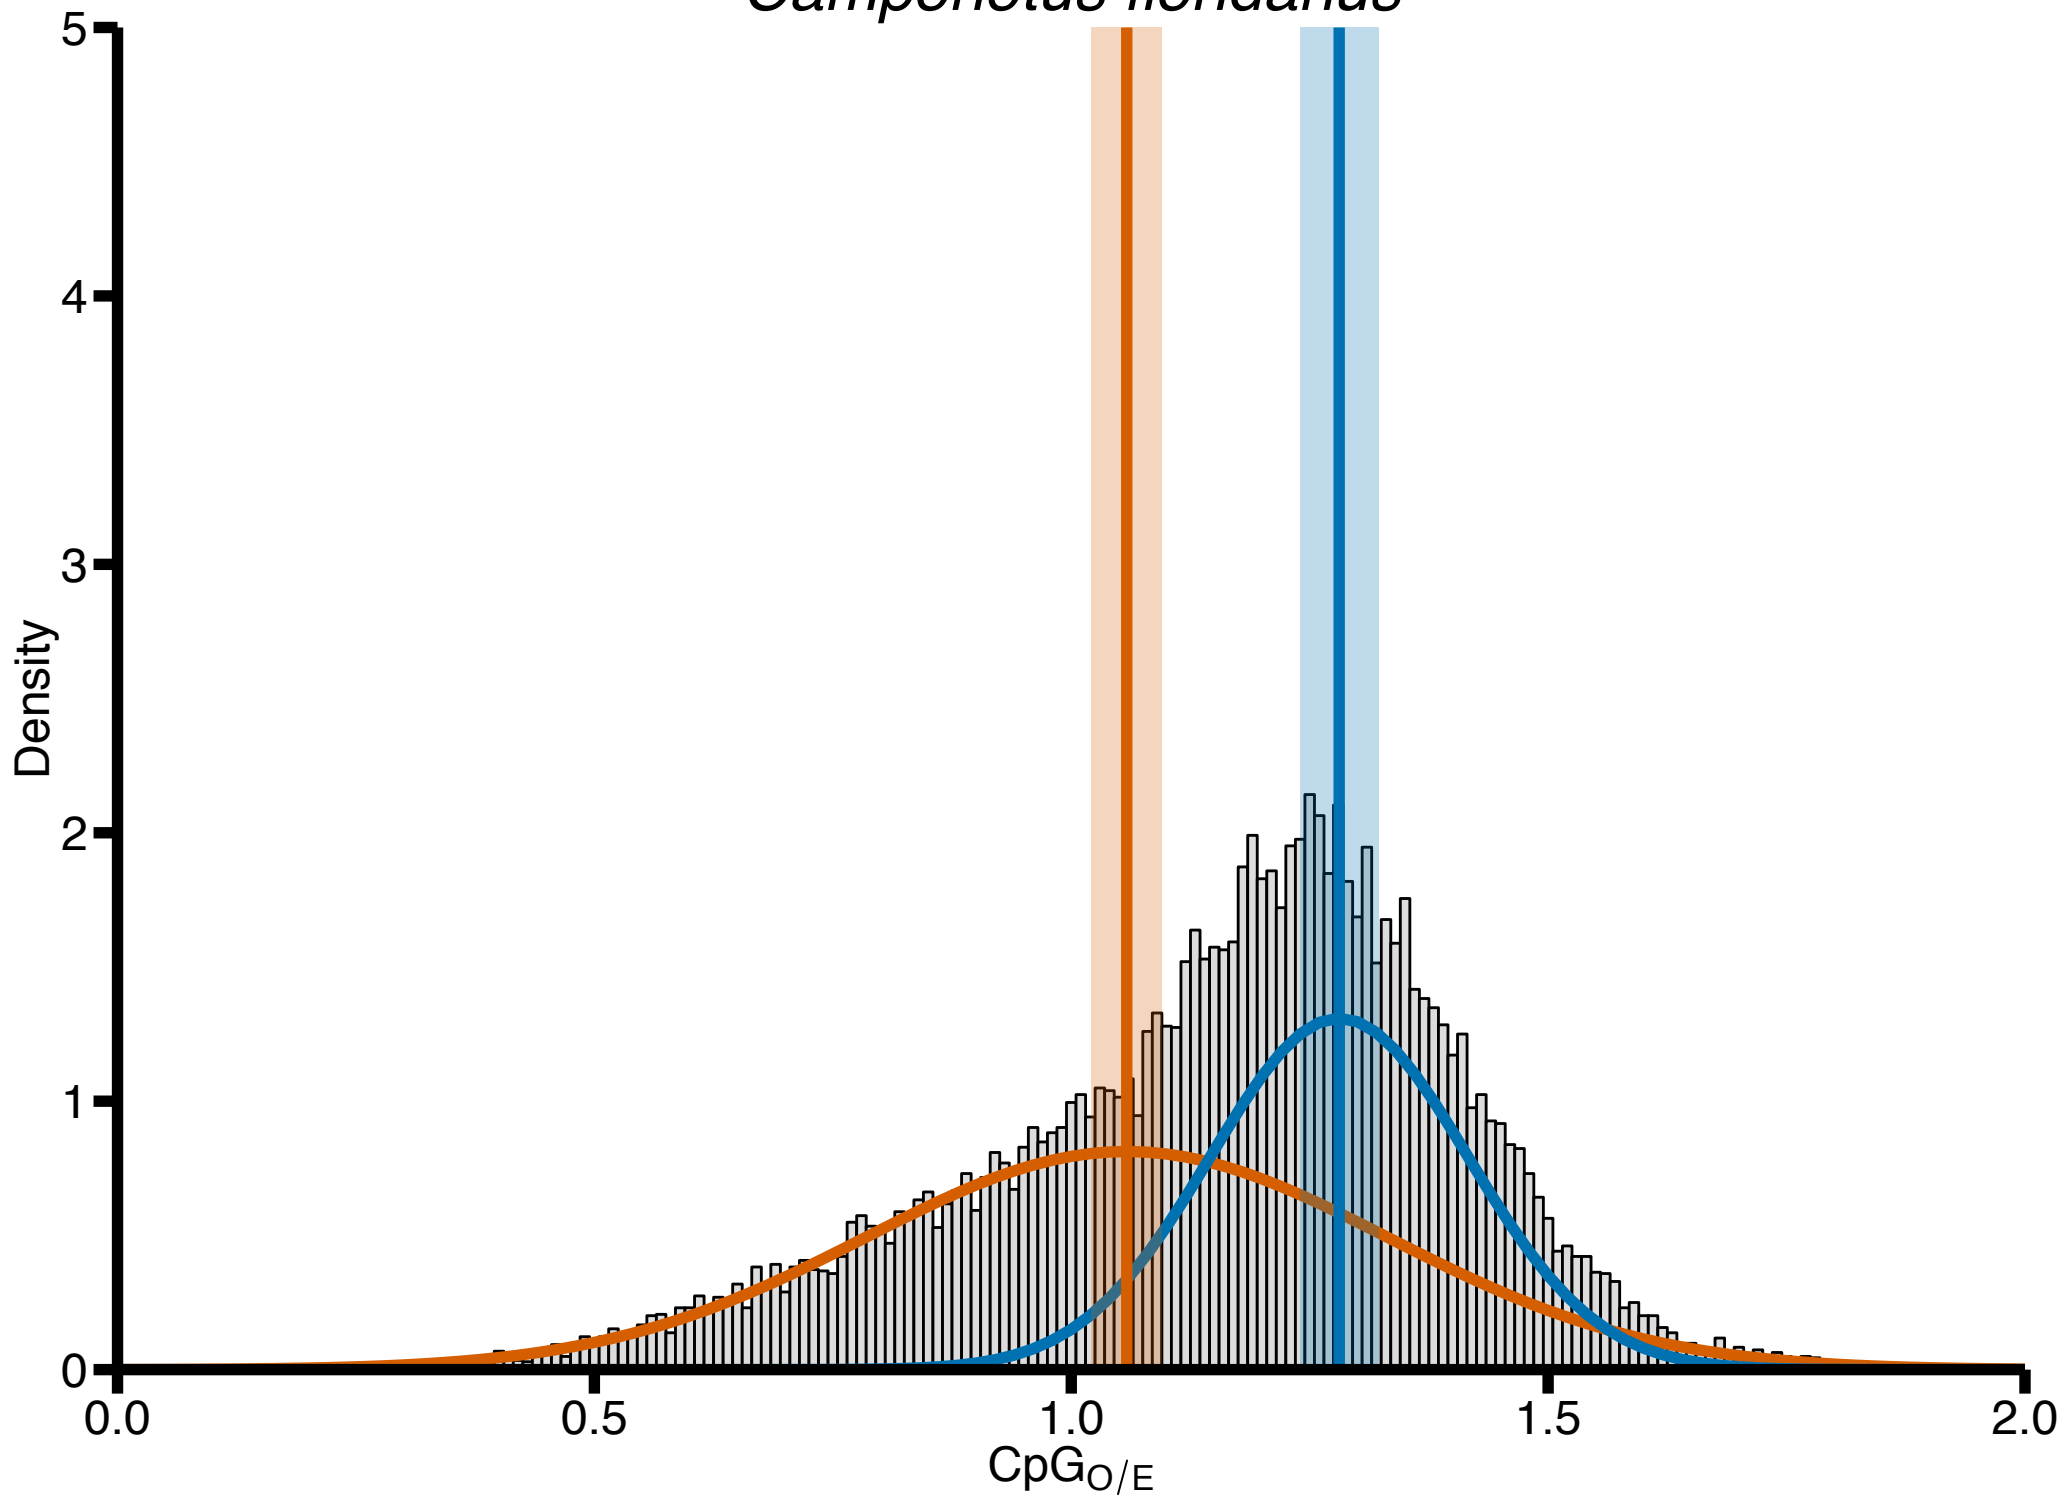

*Cerapachys biroi*

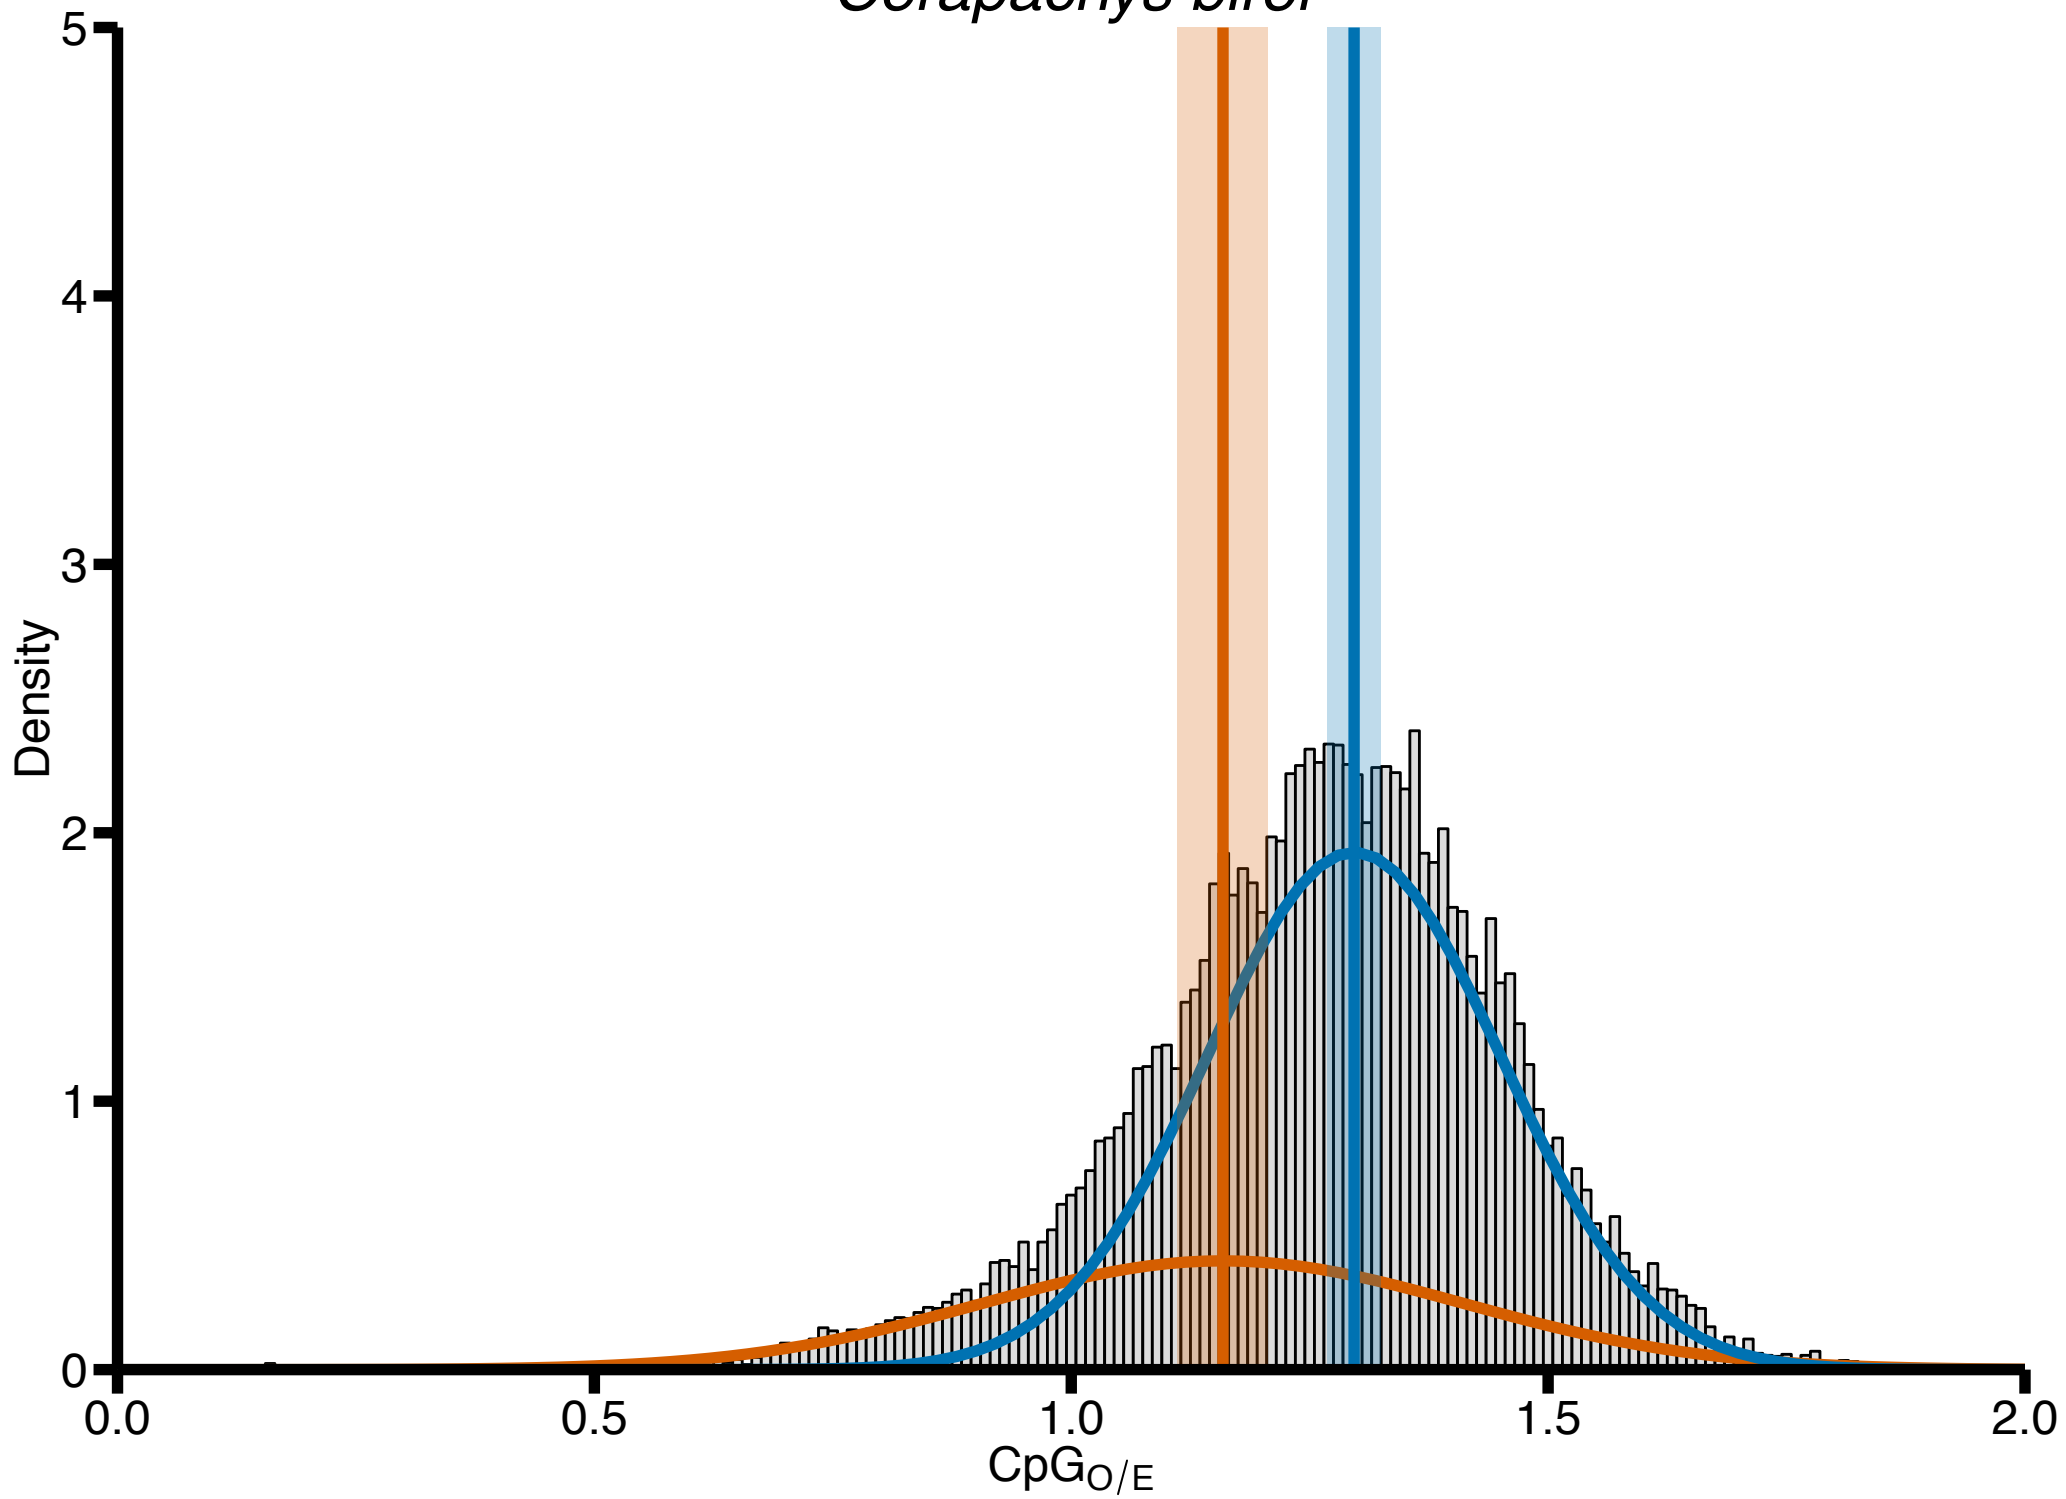

*Ceratosolen solmsi marchali*

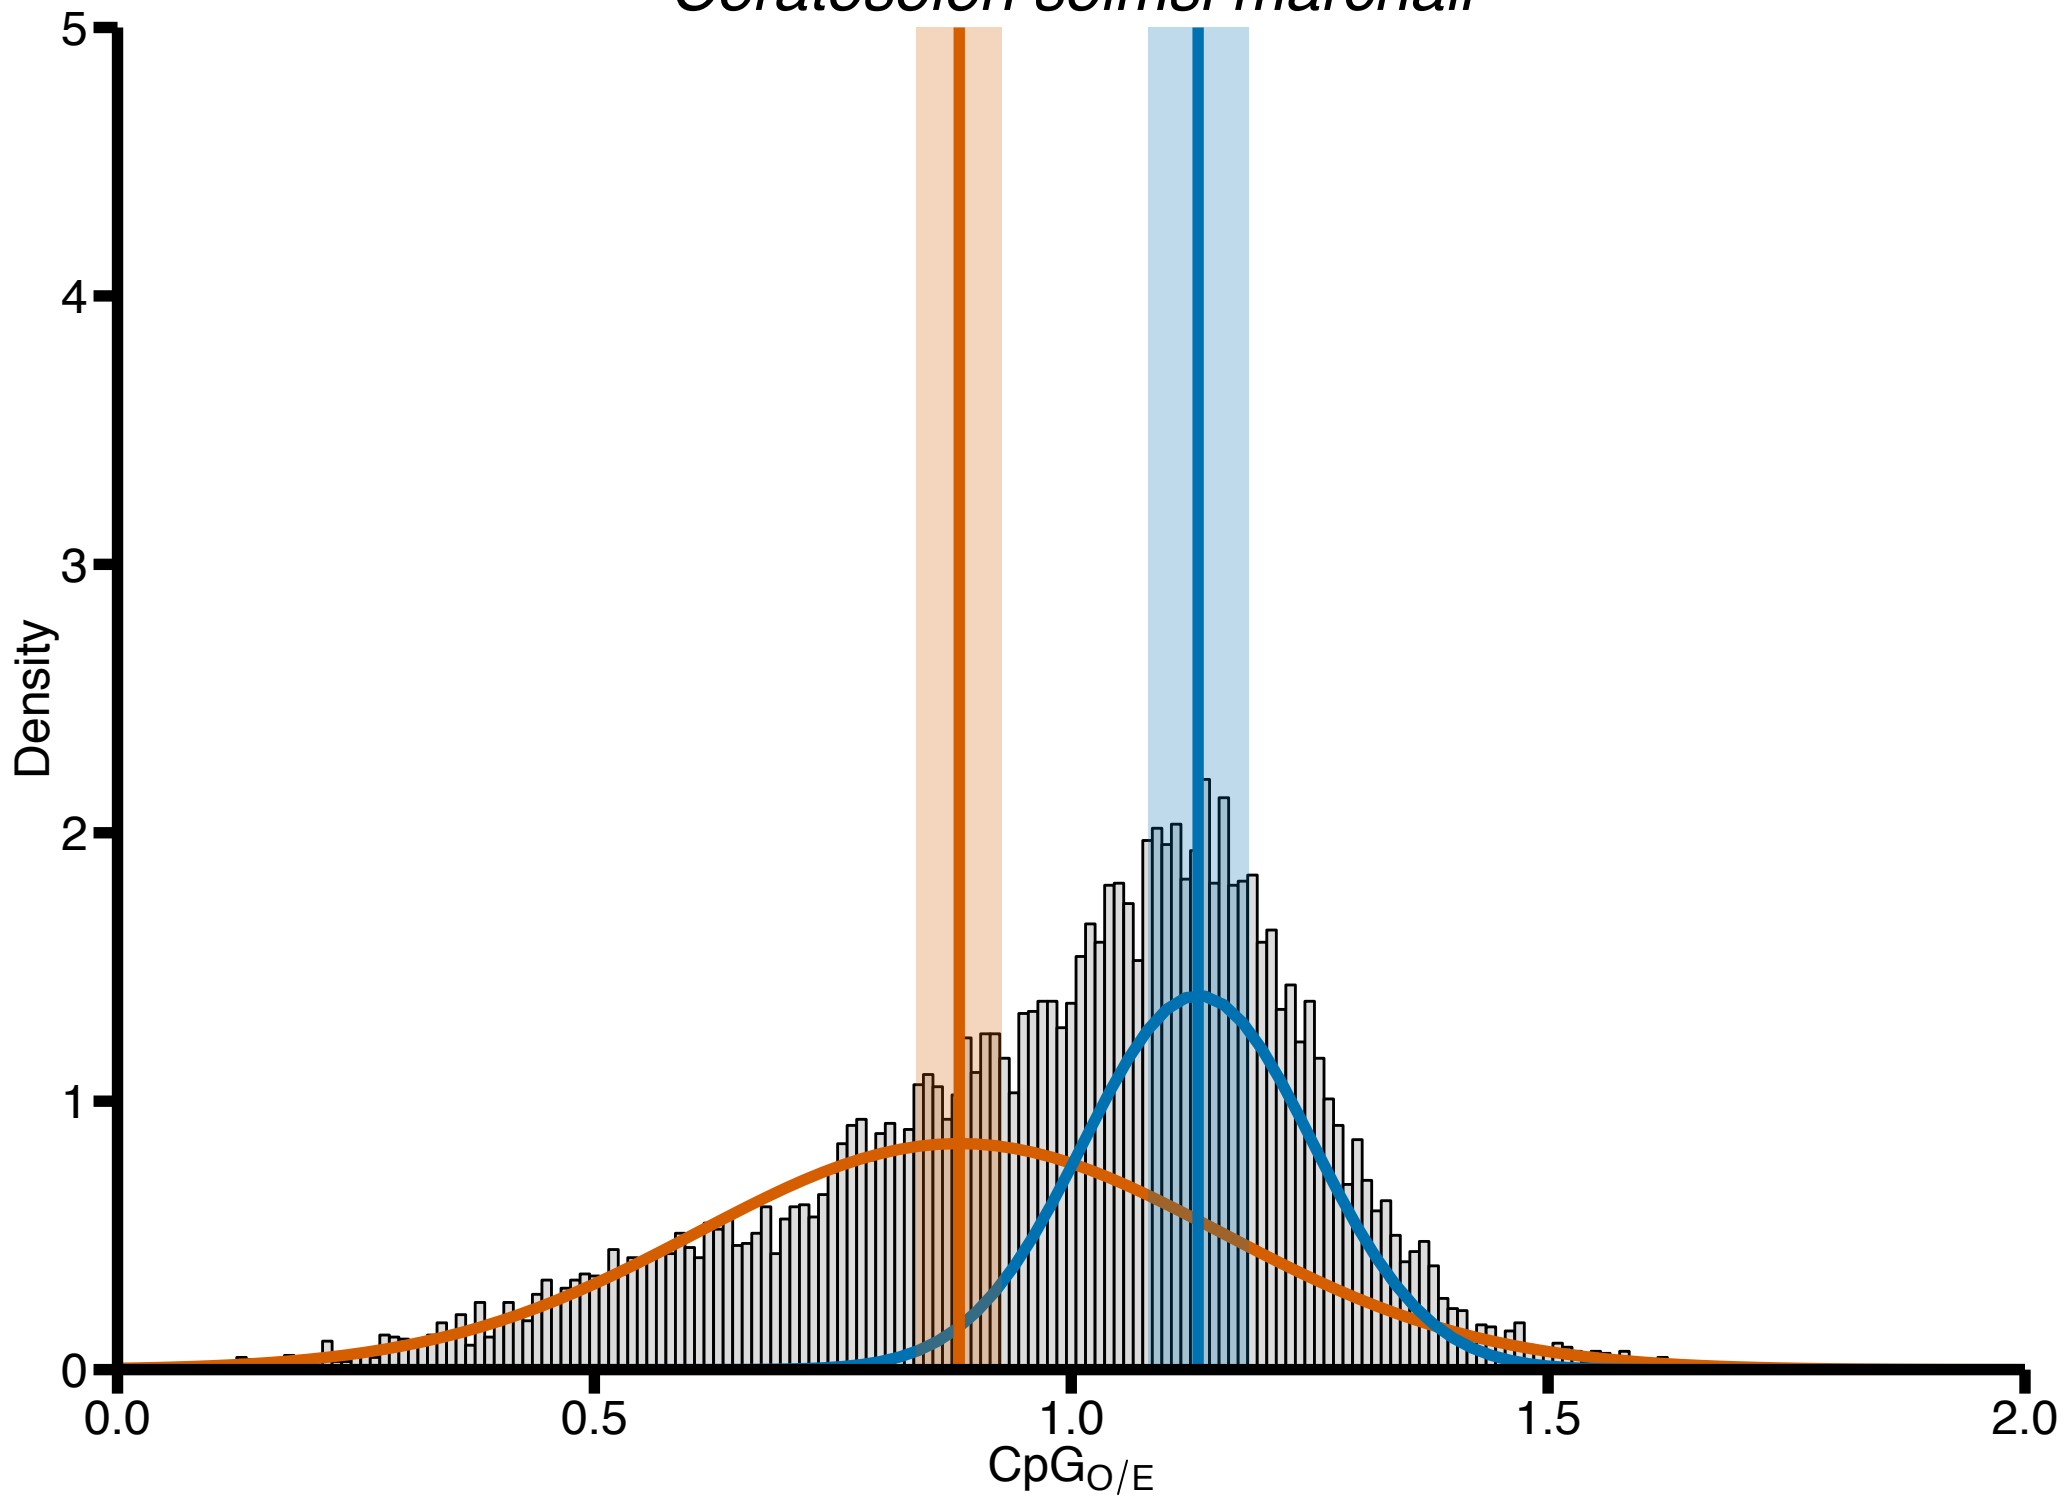



*Dinoponera quadriceps*

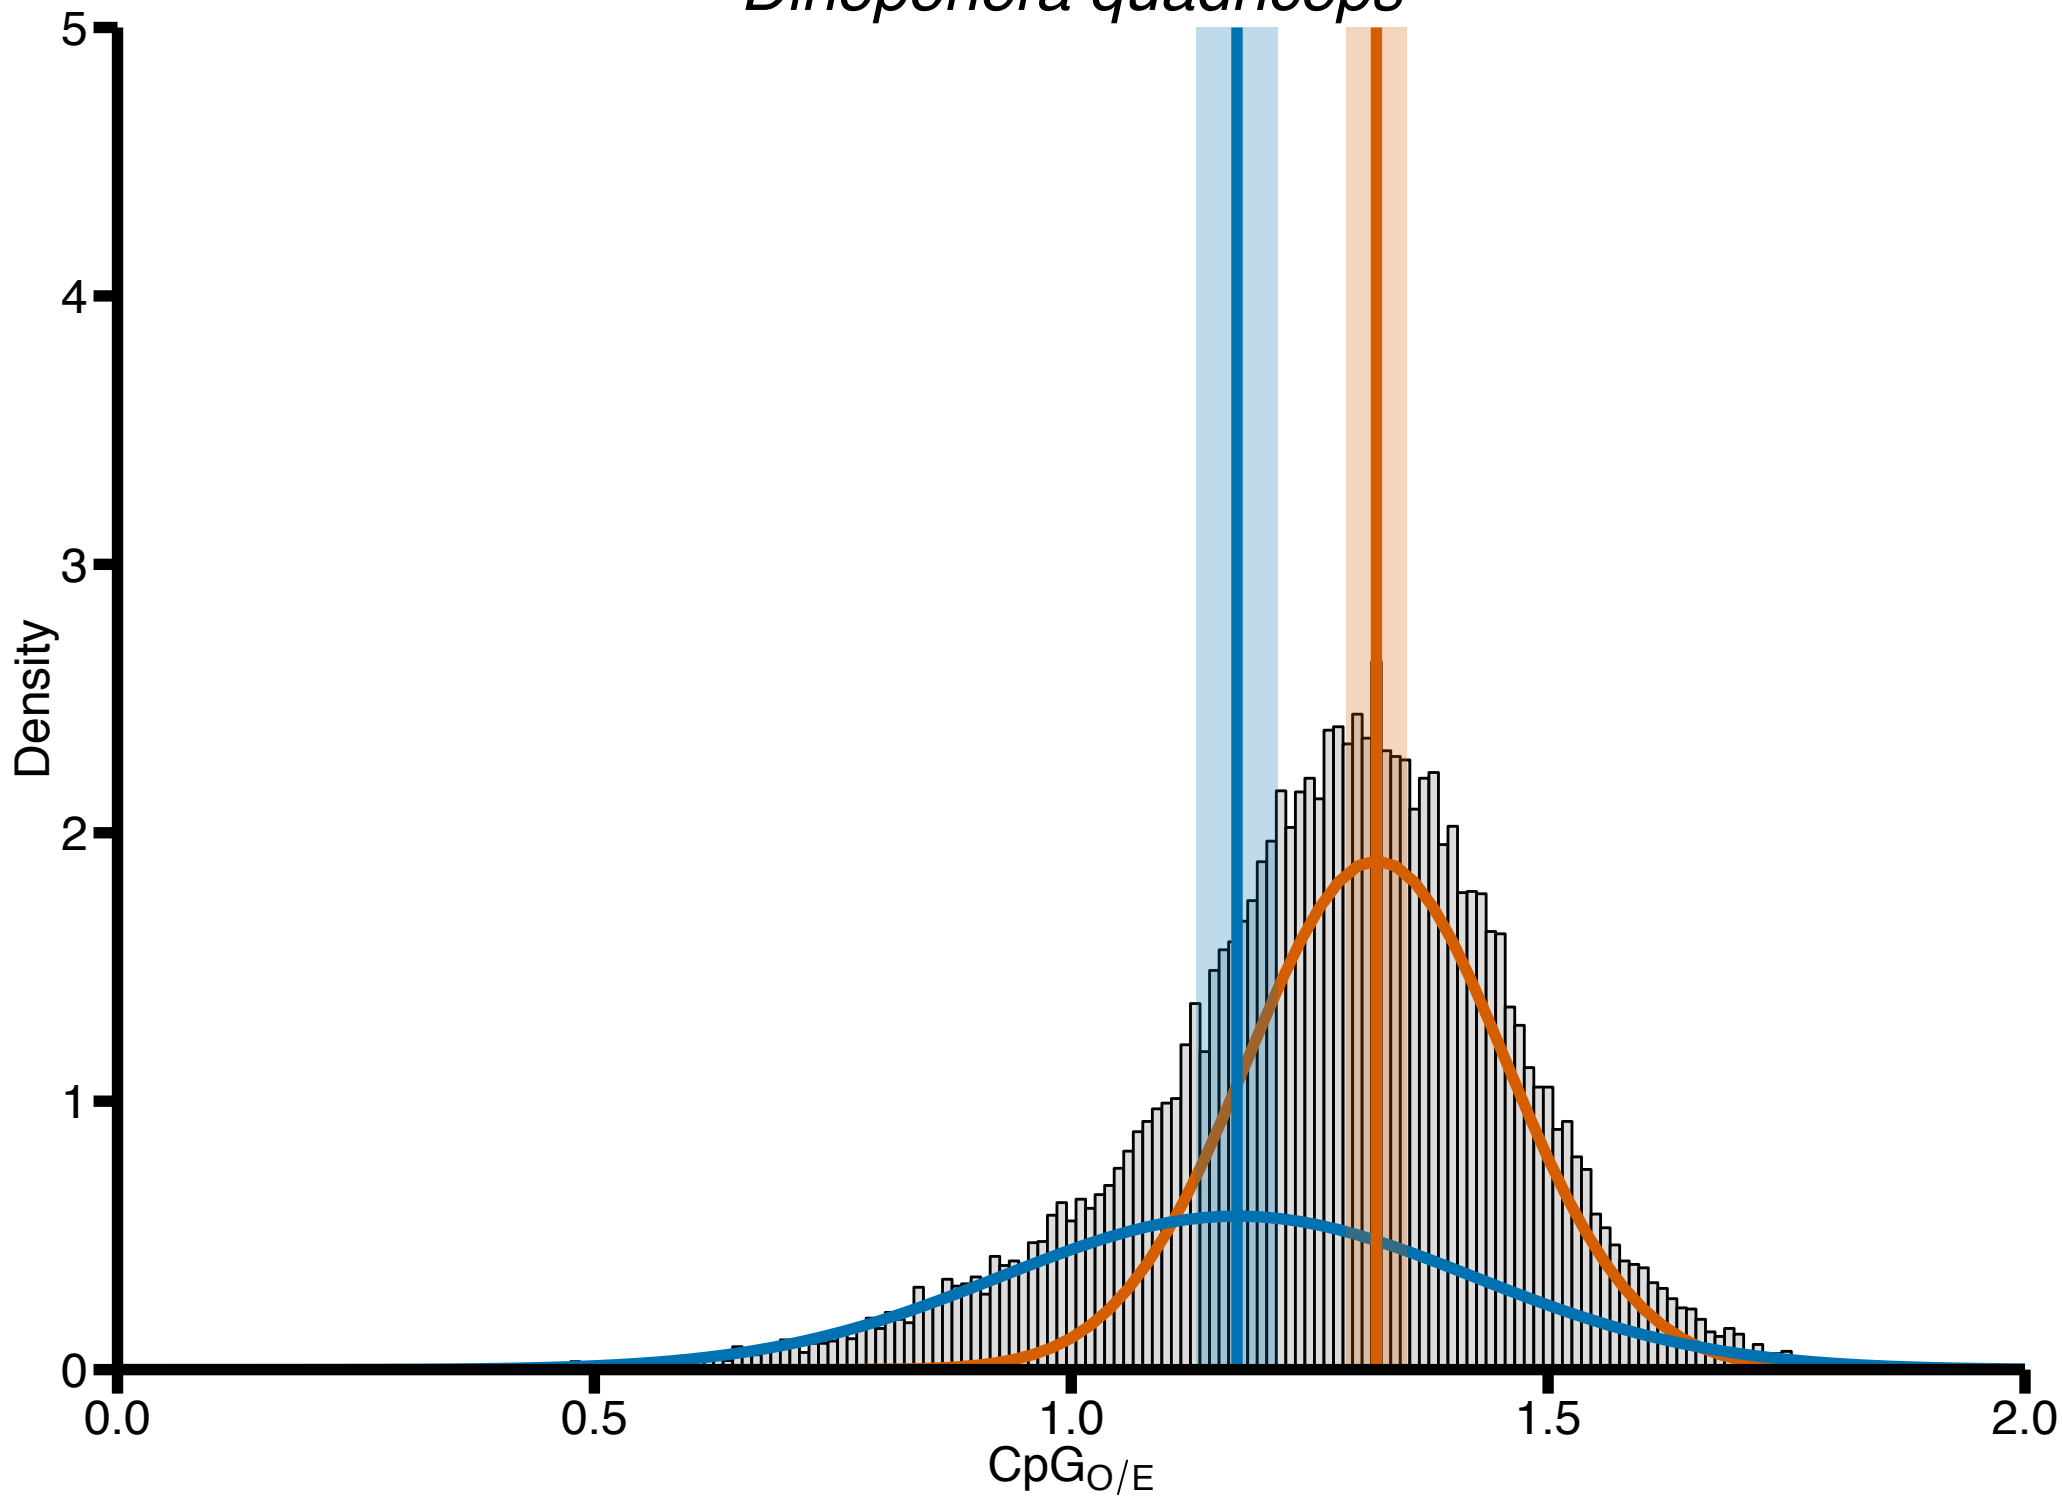

*Dufourea novaeangliae*

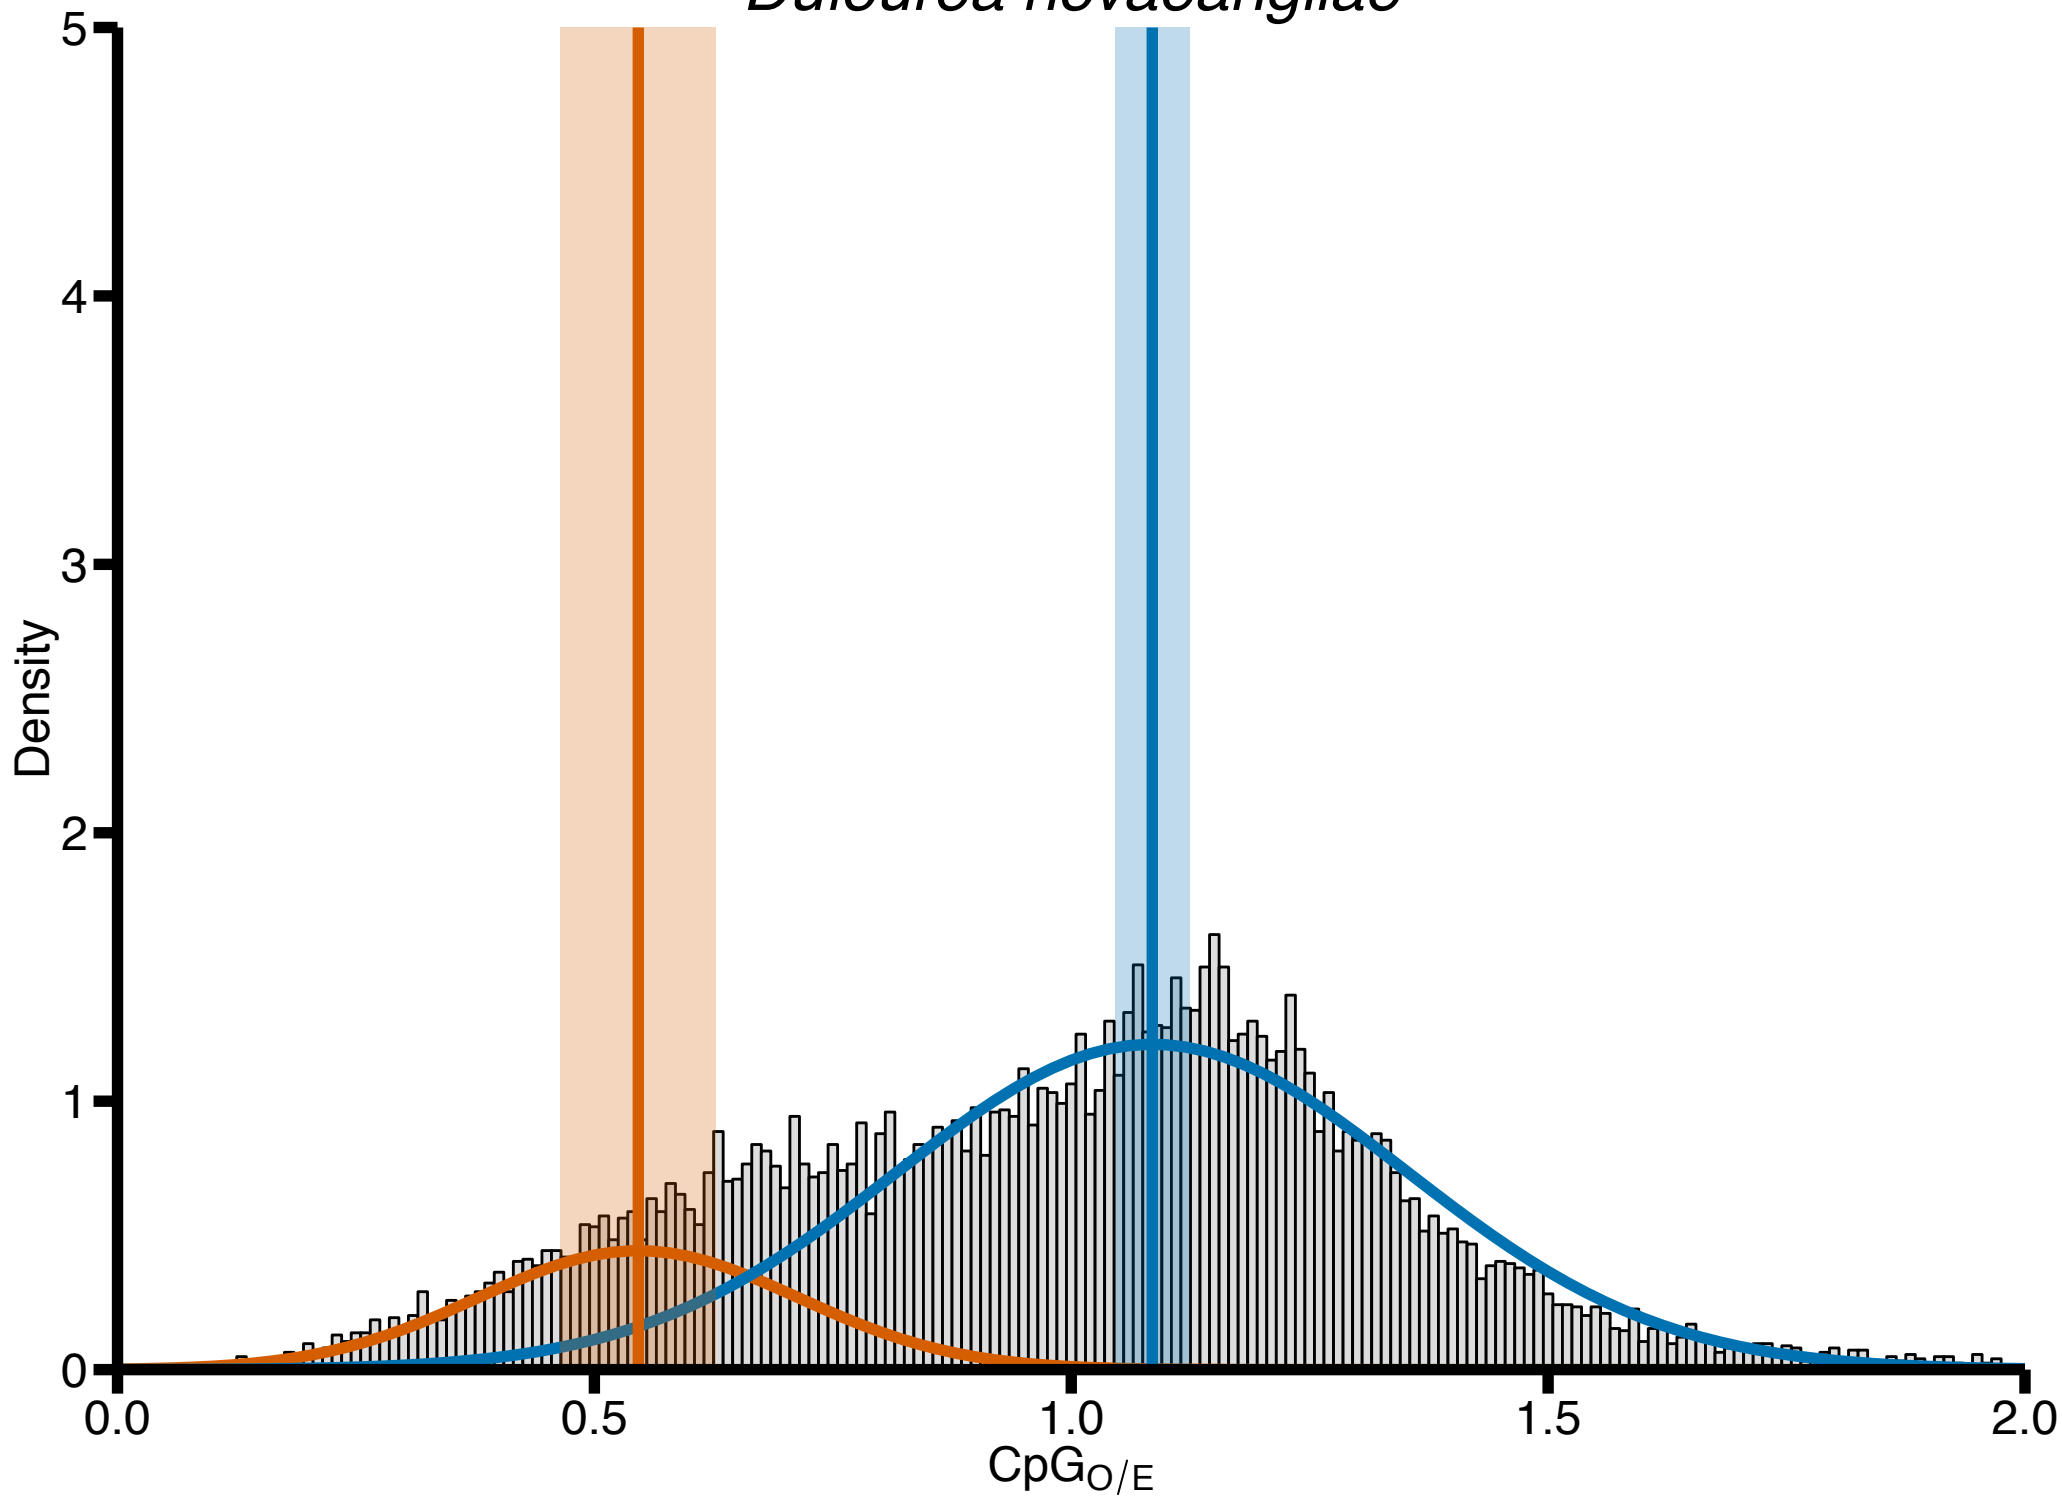

*Eufriesea mexicana*

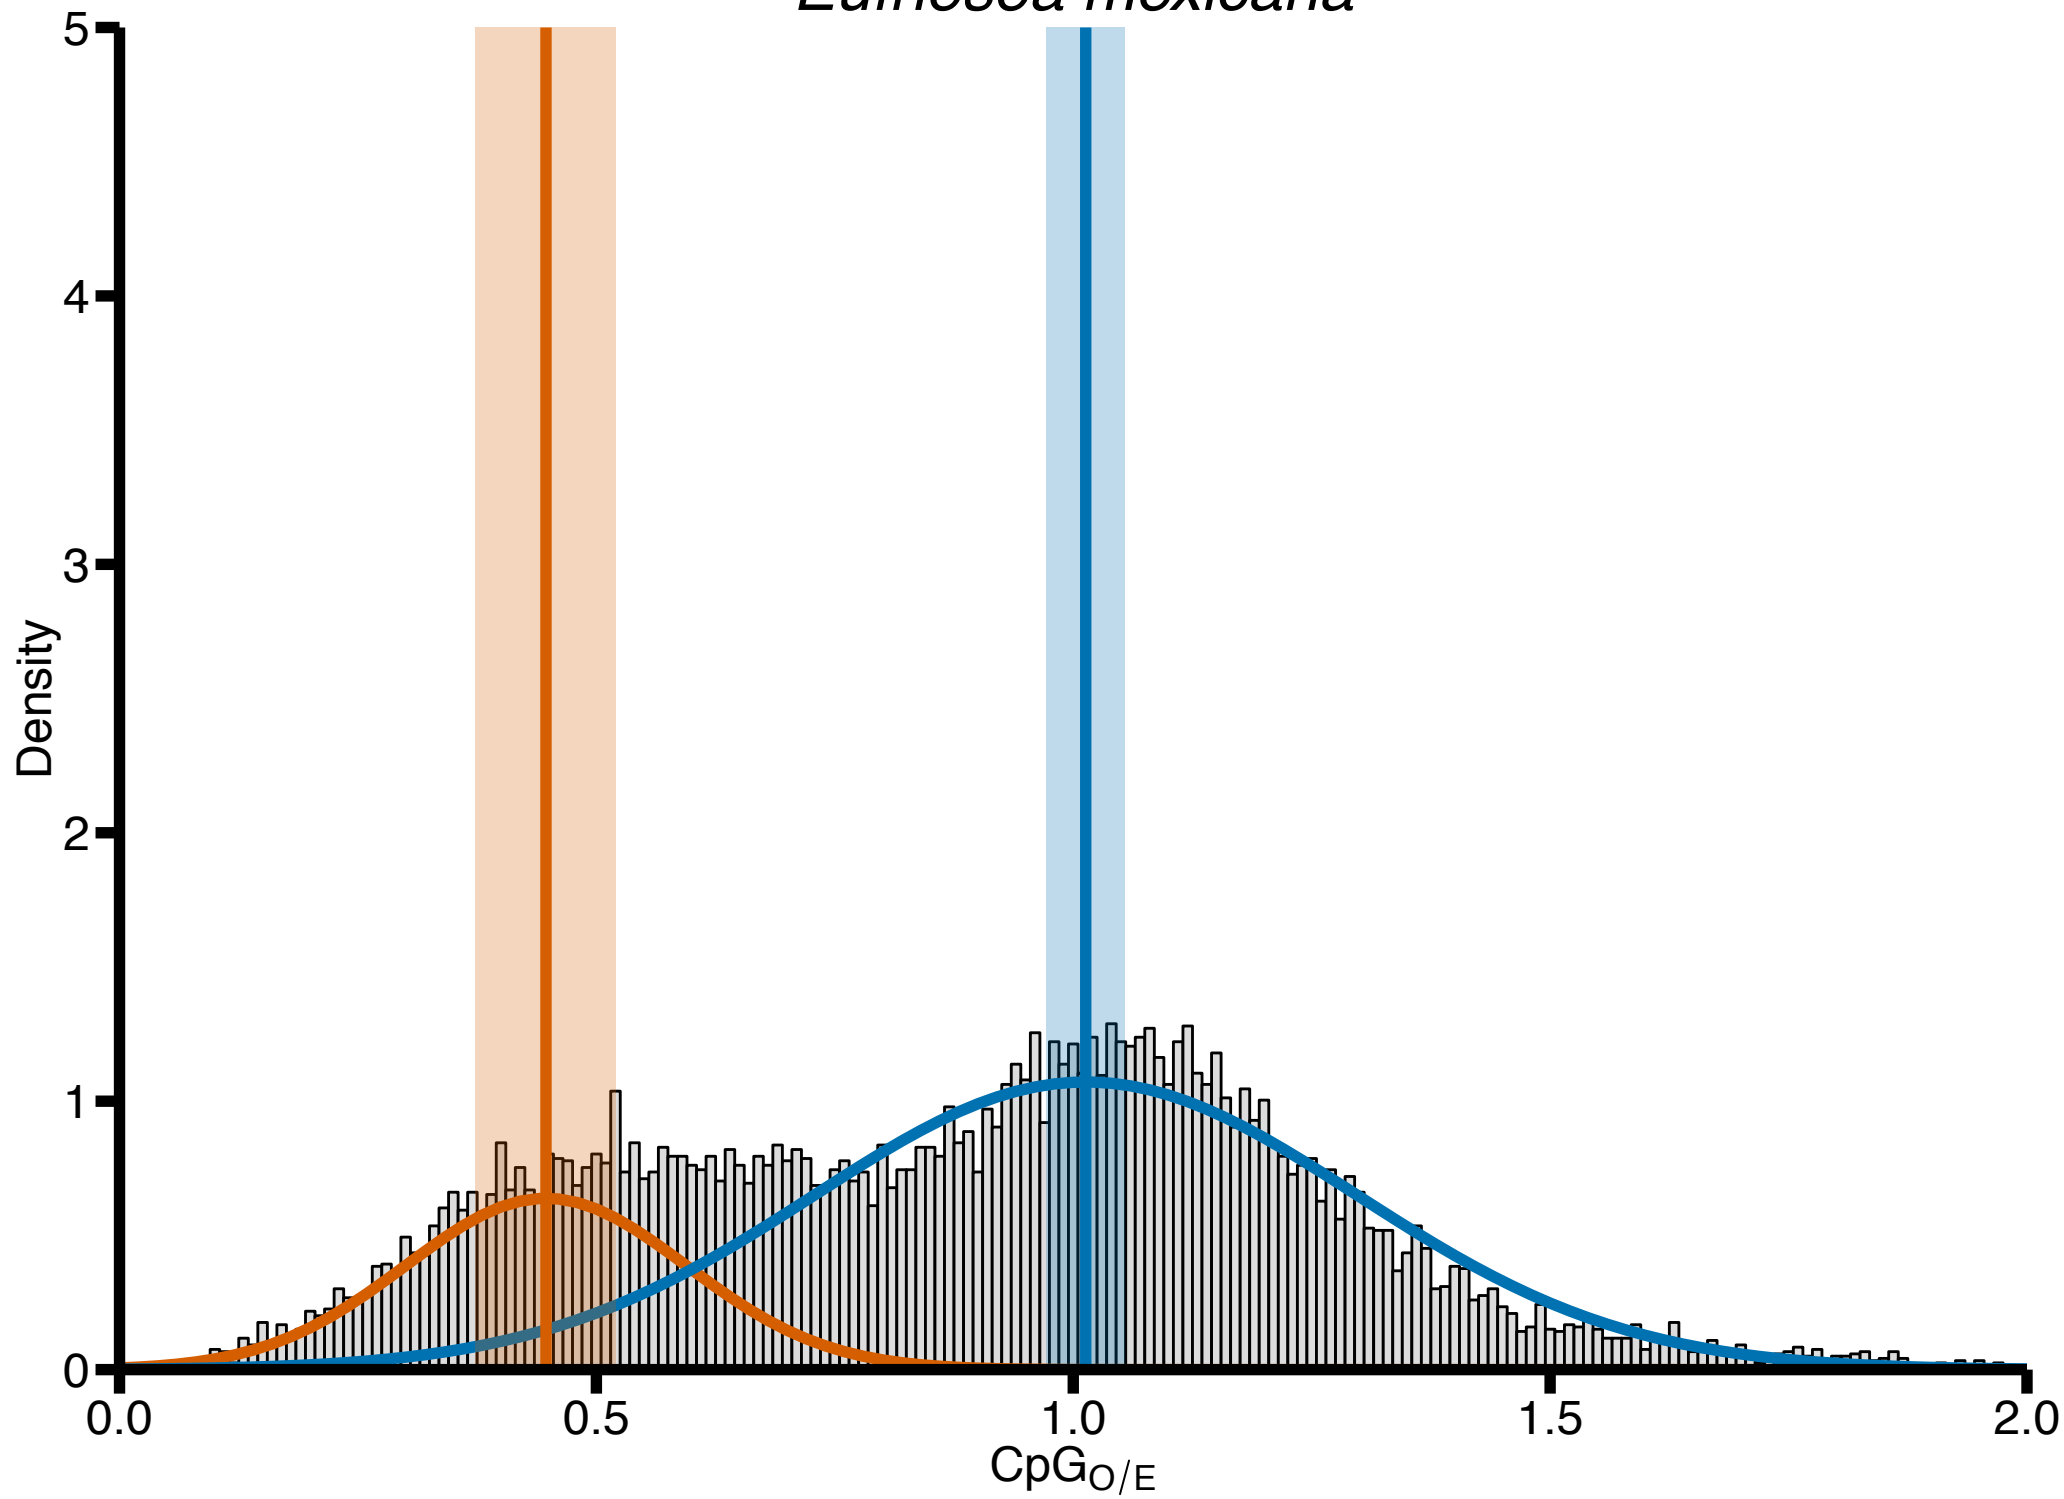

*Fopius arisanus*

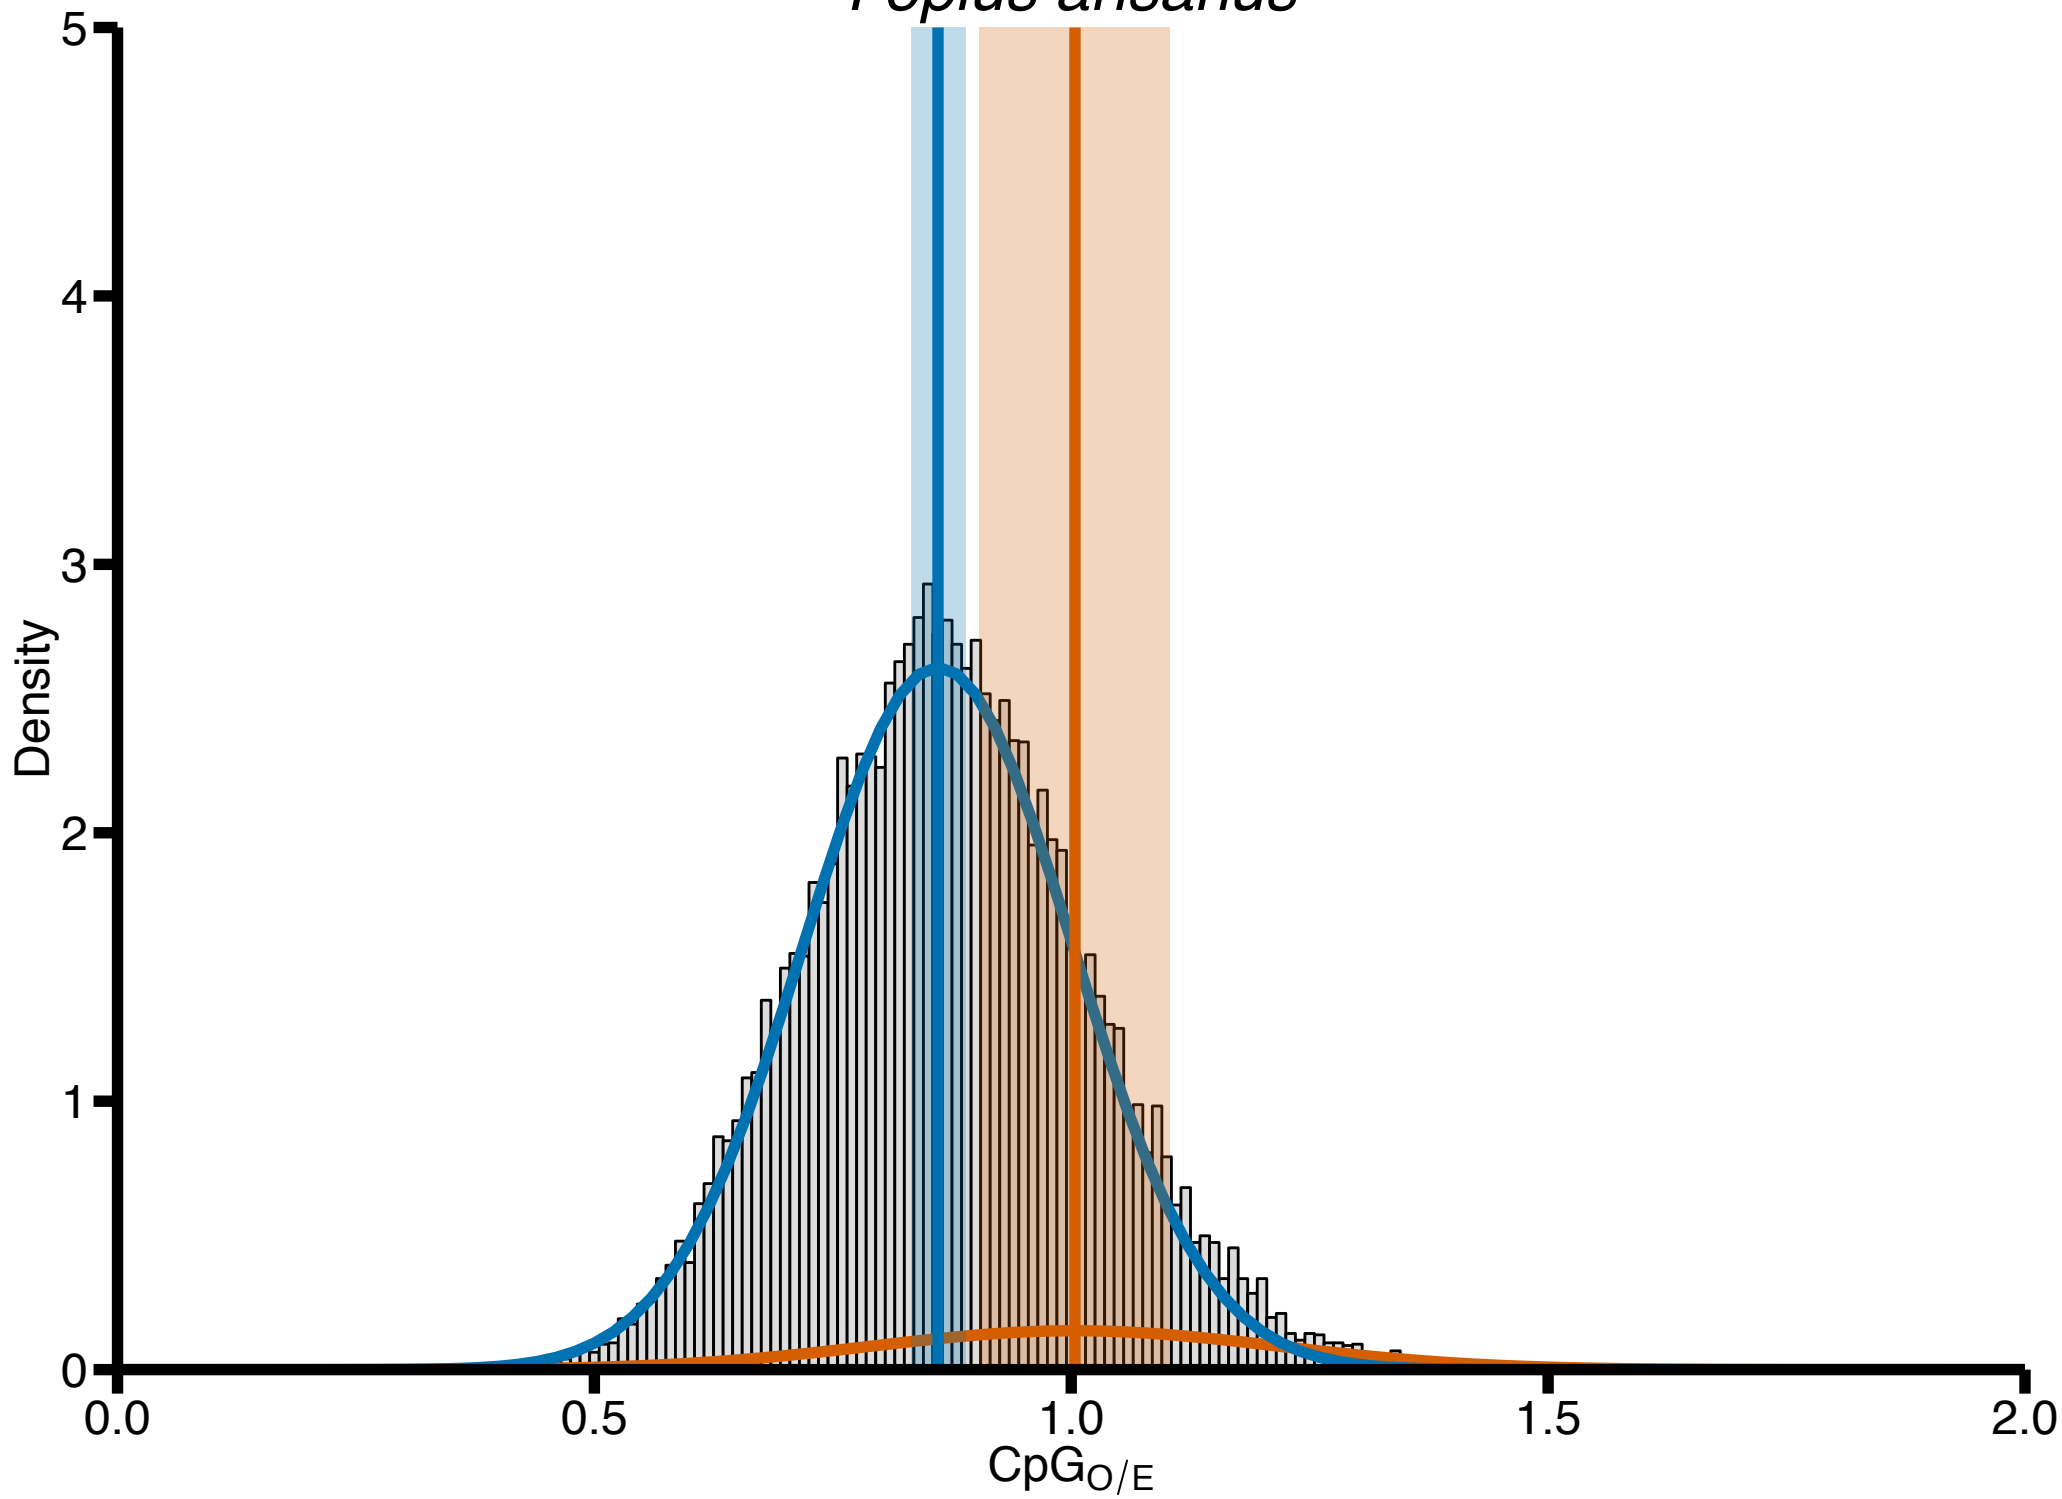

*Habropoda laboriosa*

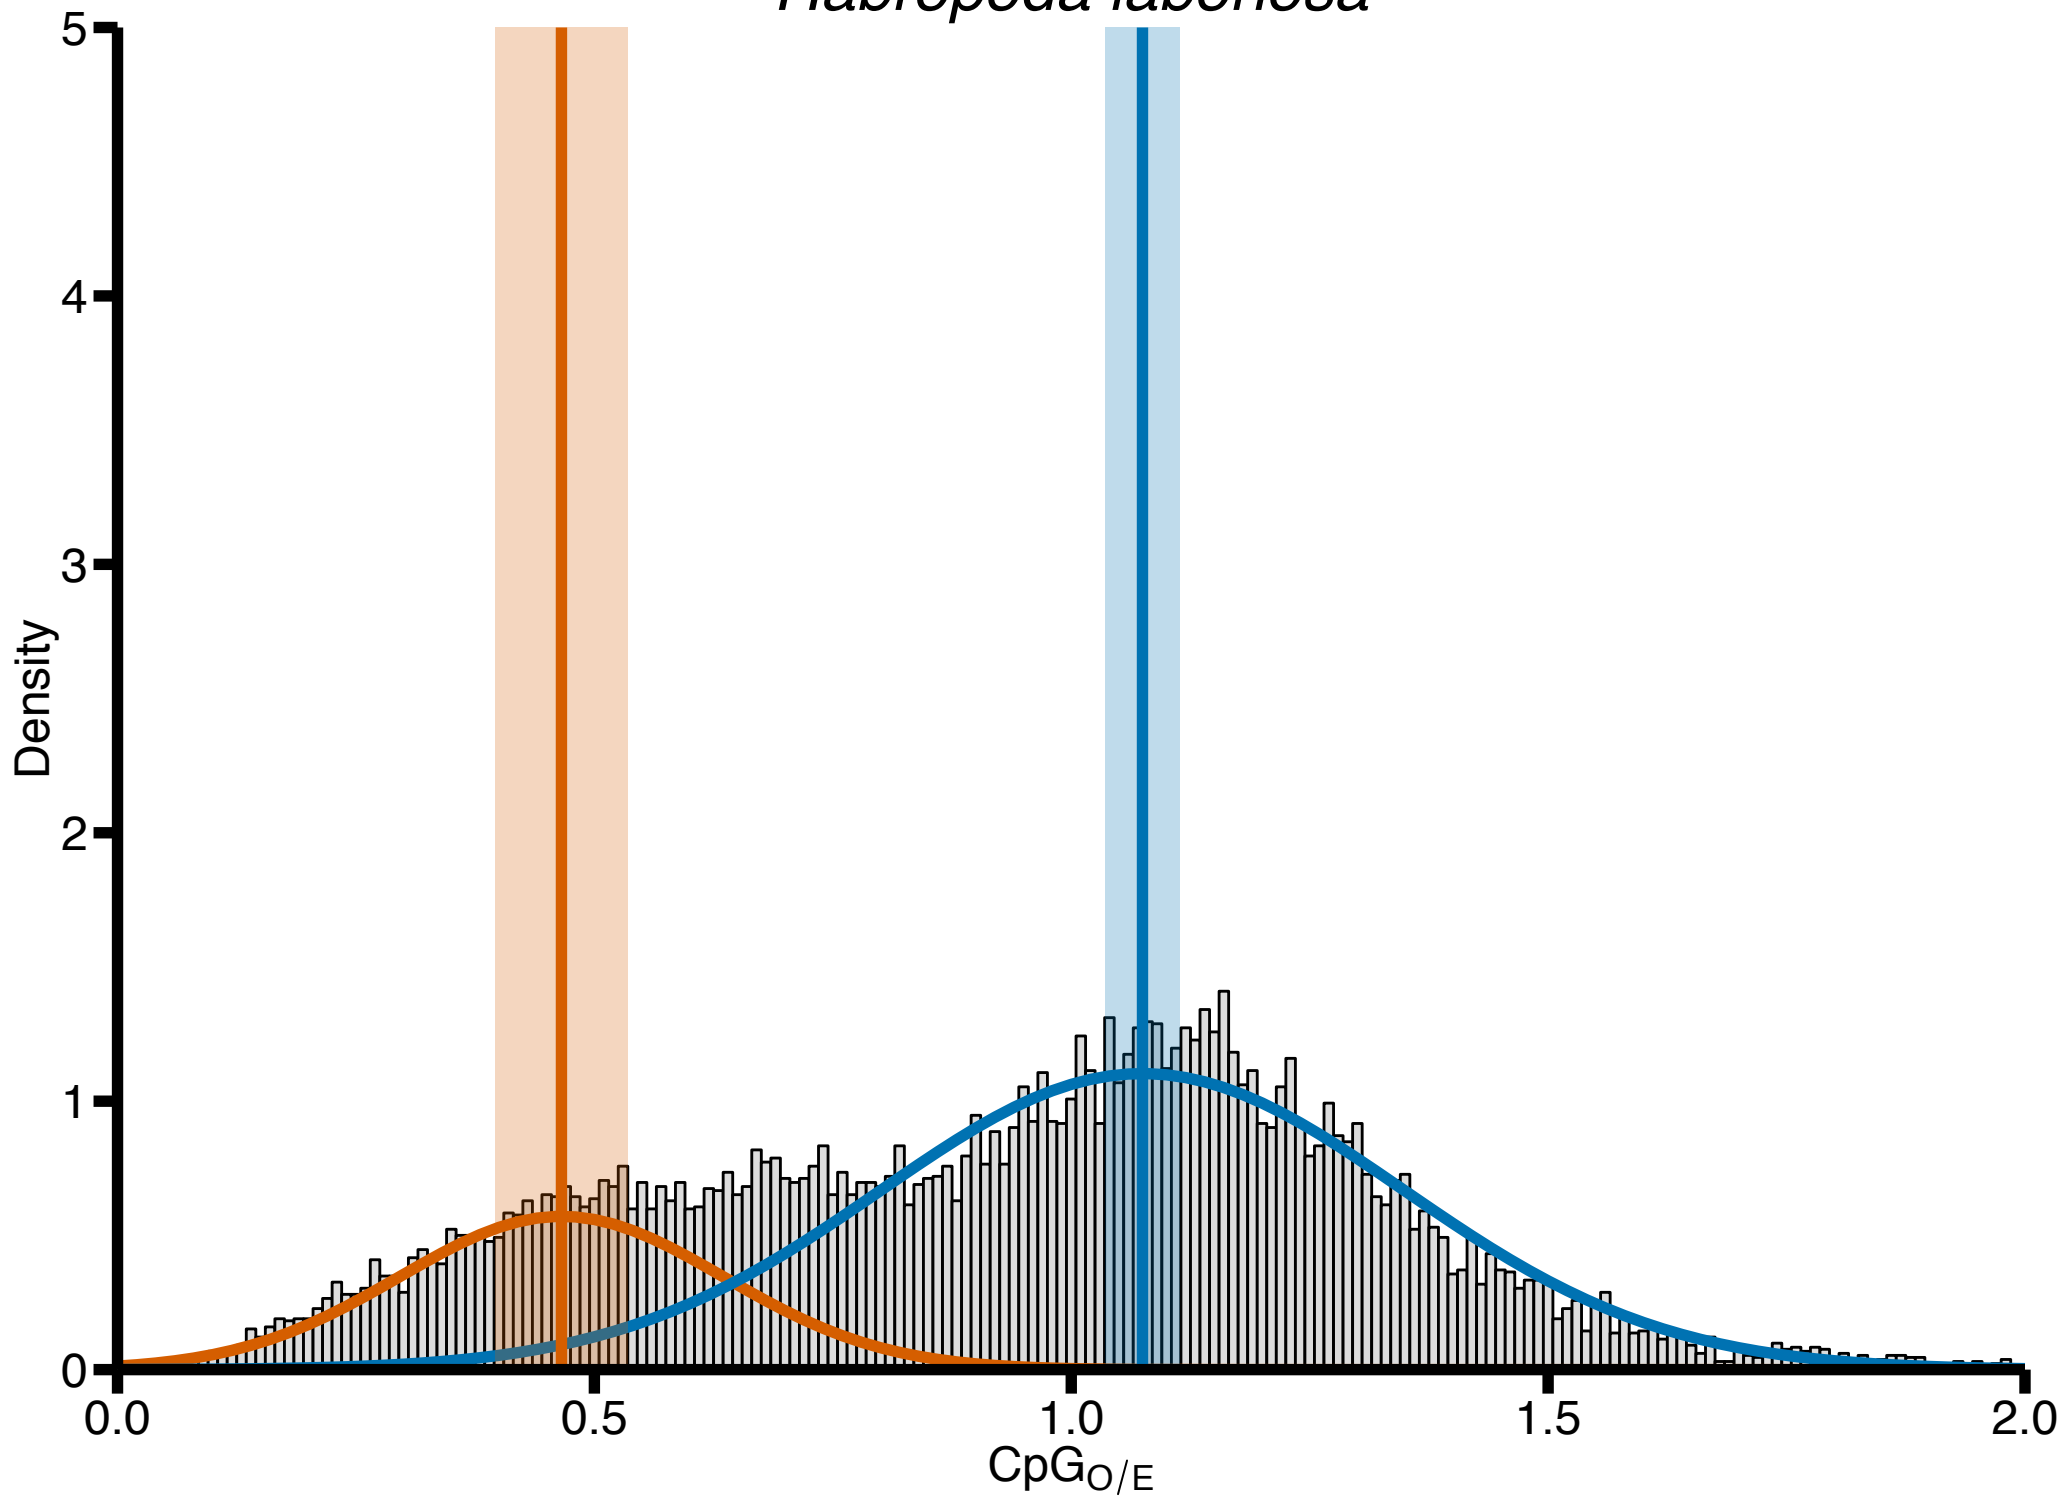

*Harpegnathos saltator*

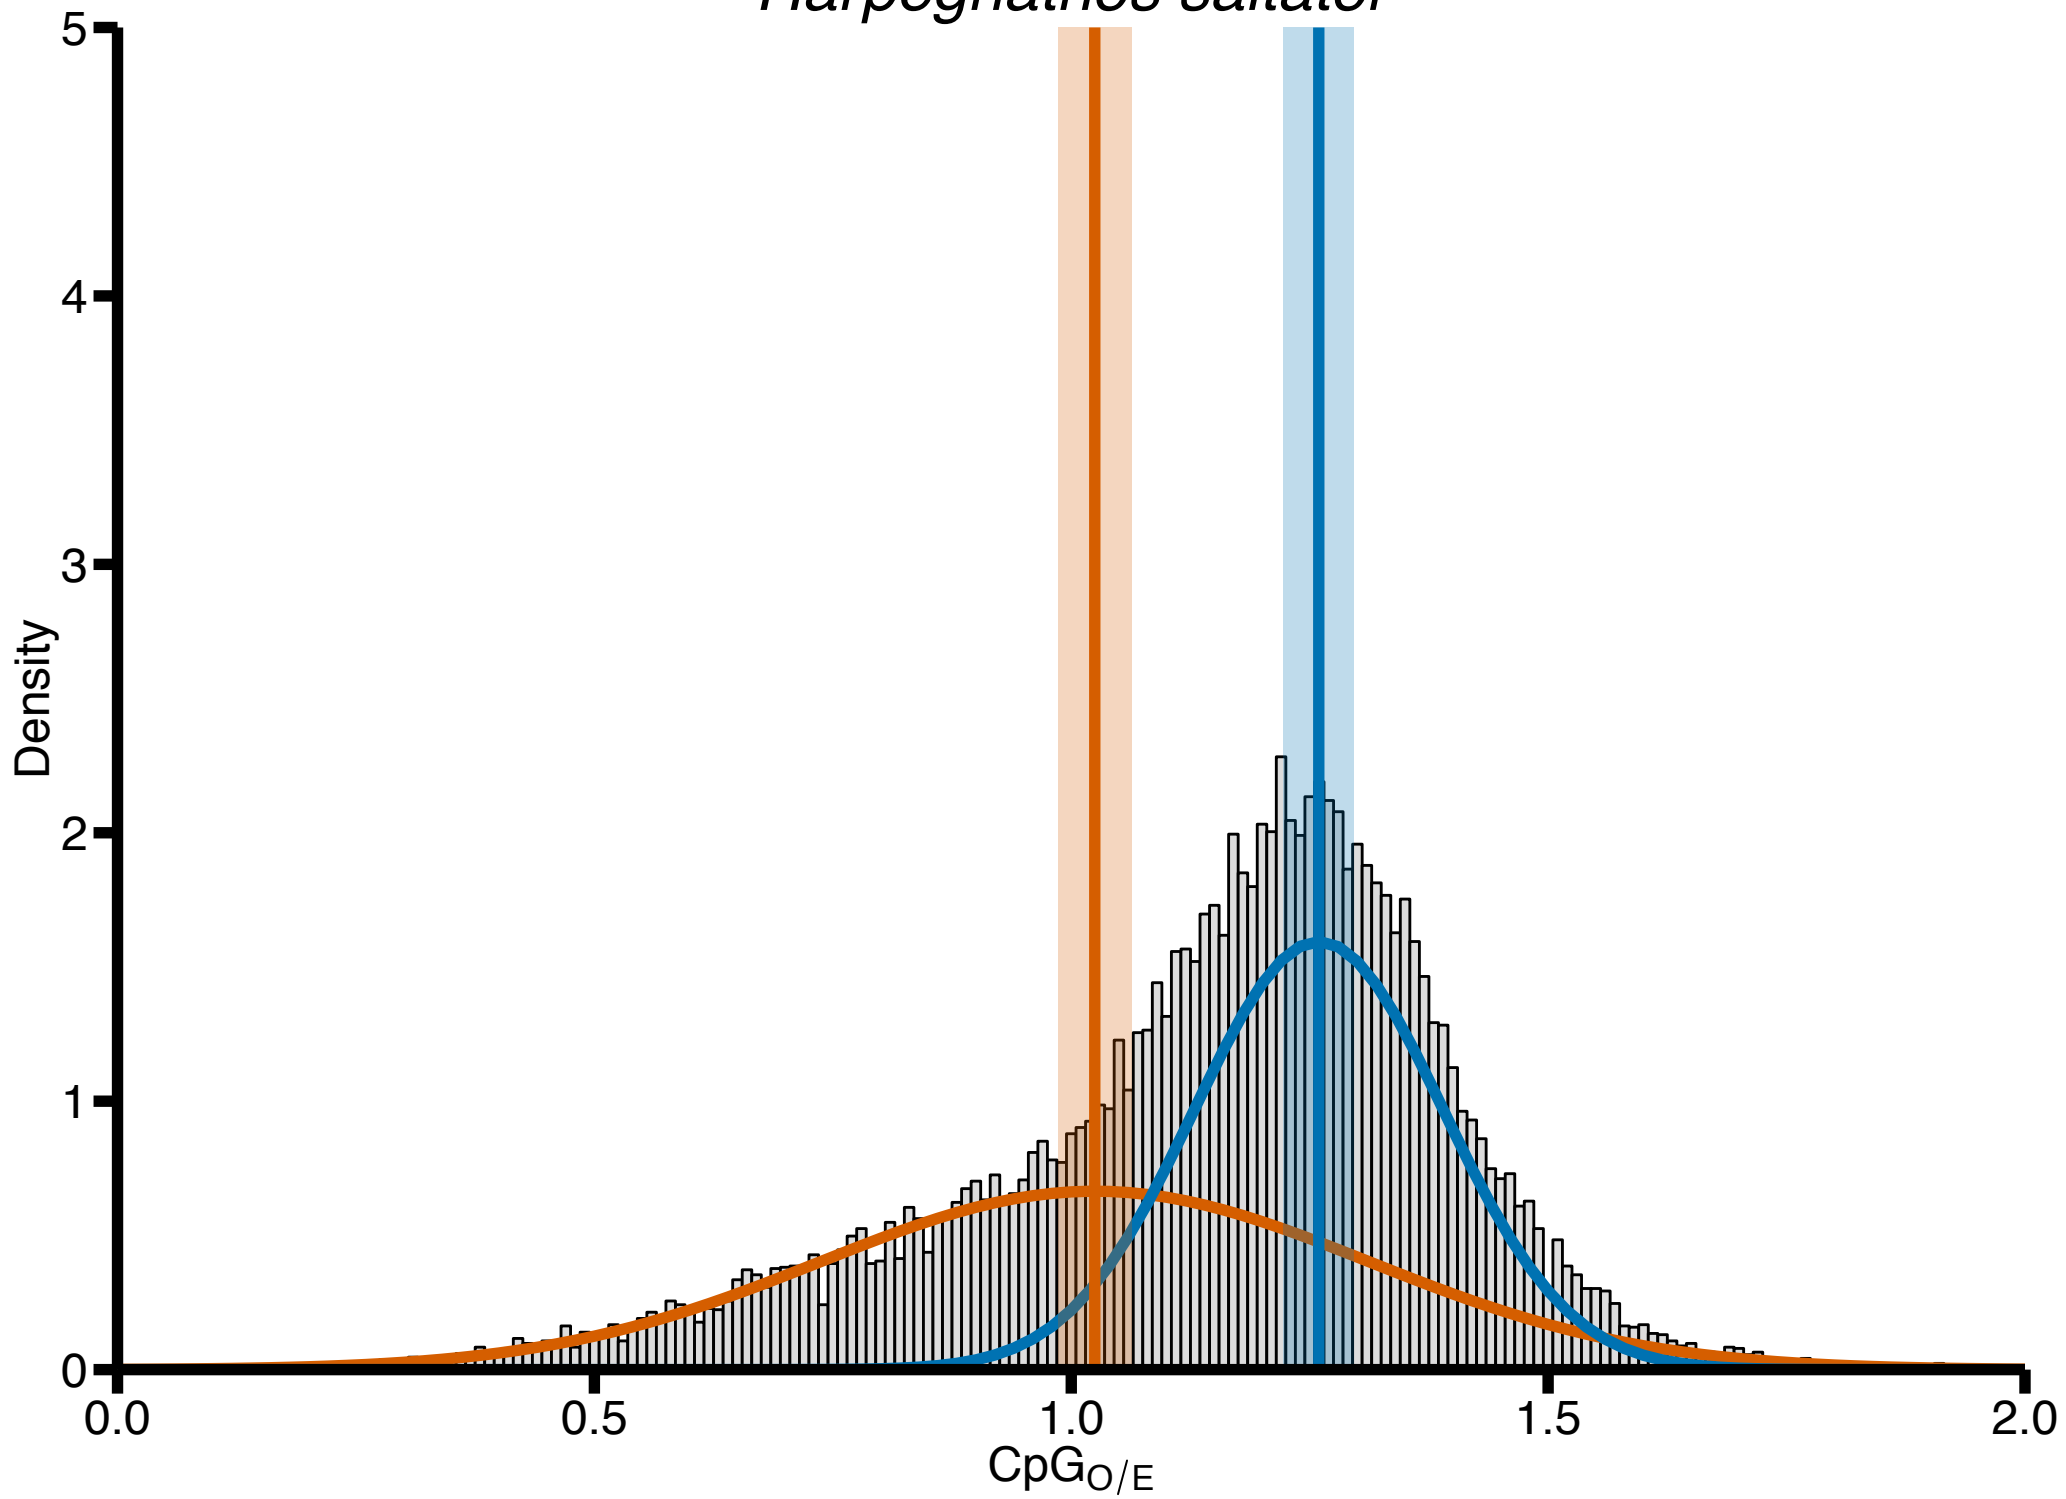

*Lasioglossum albipes*

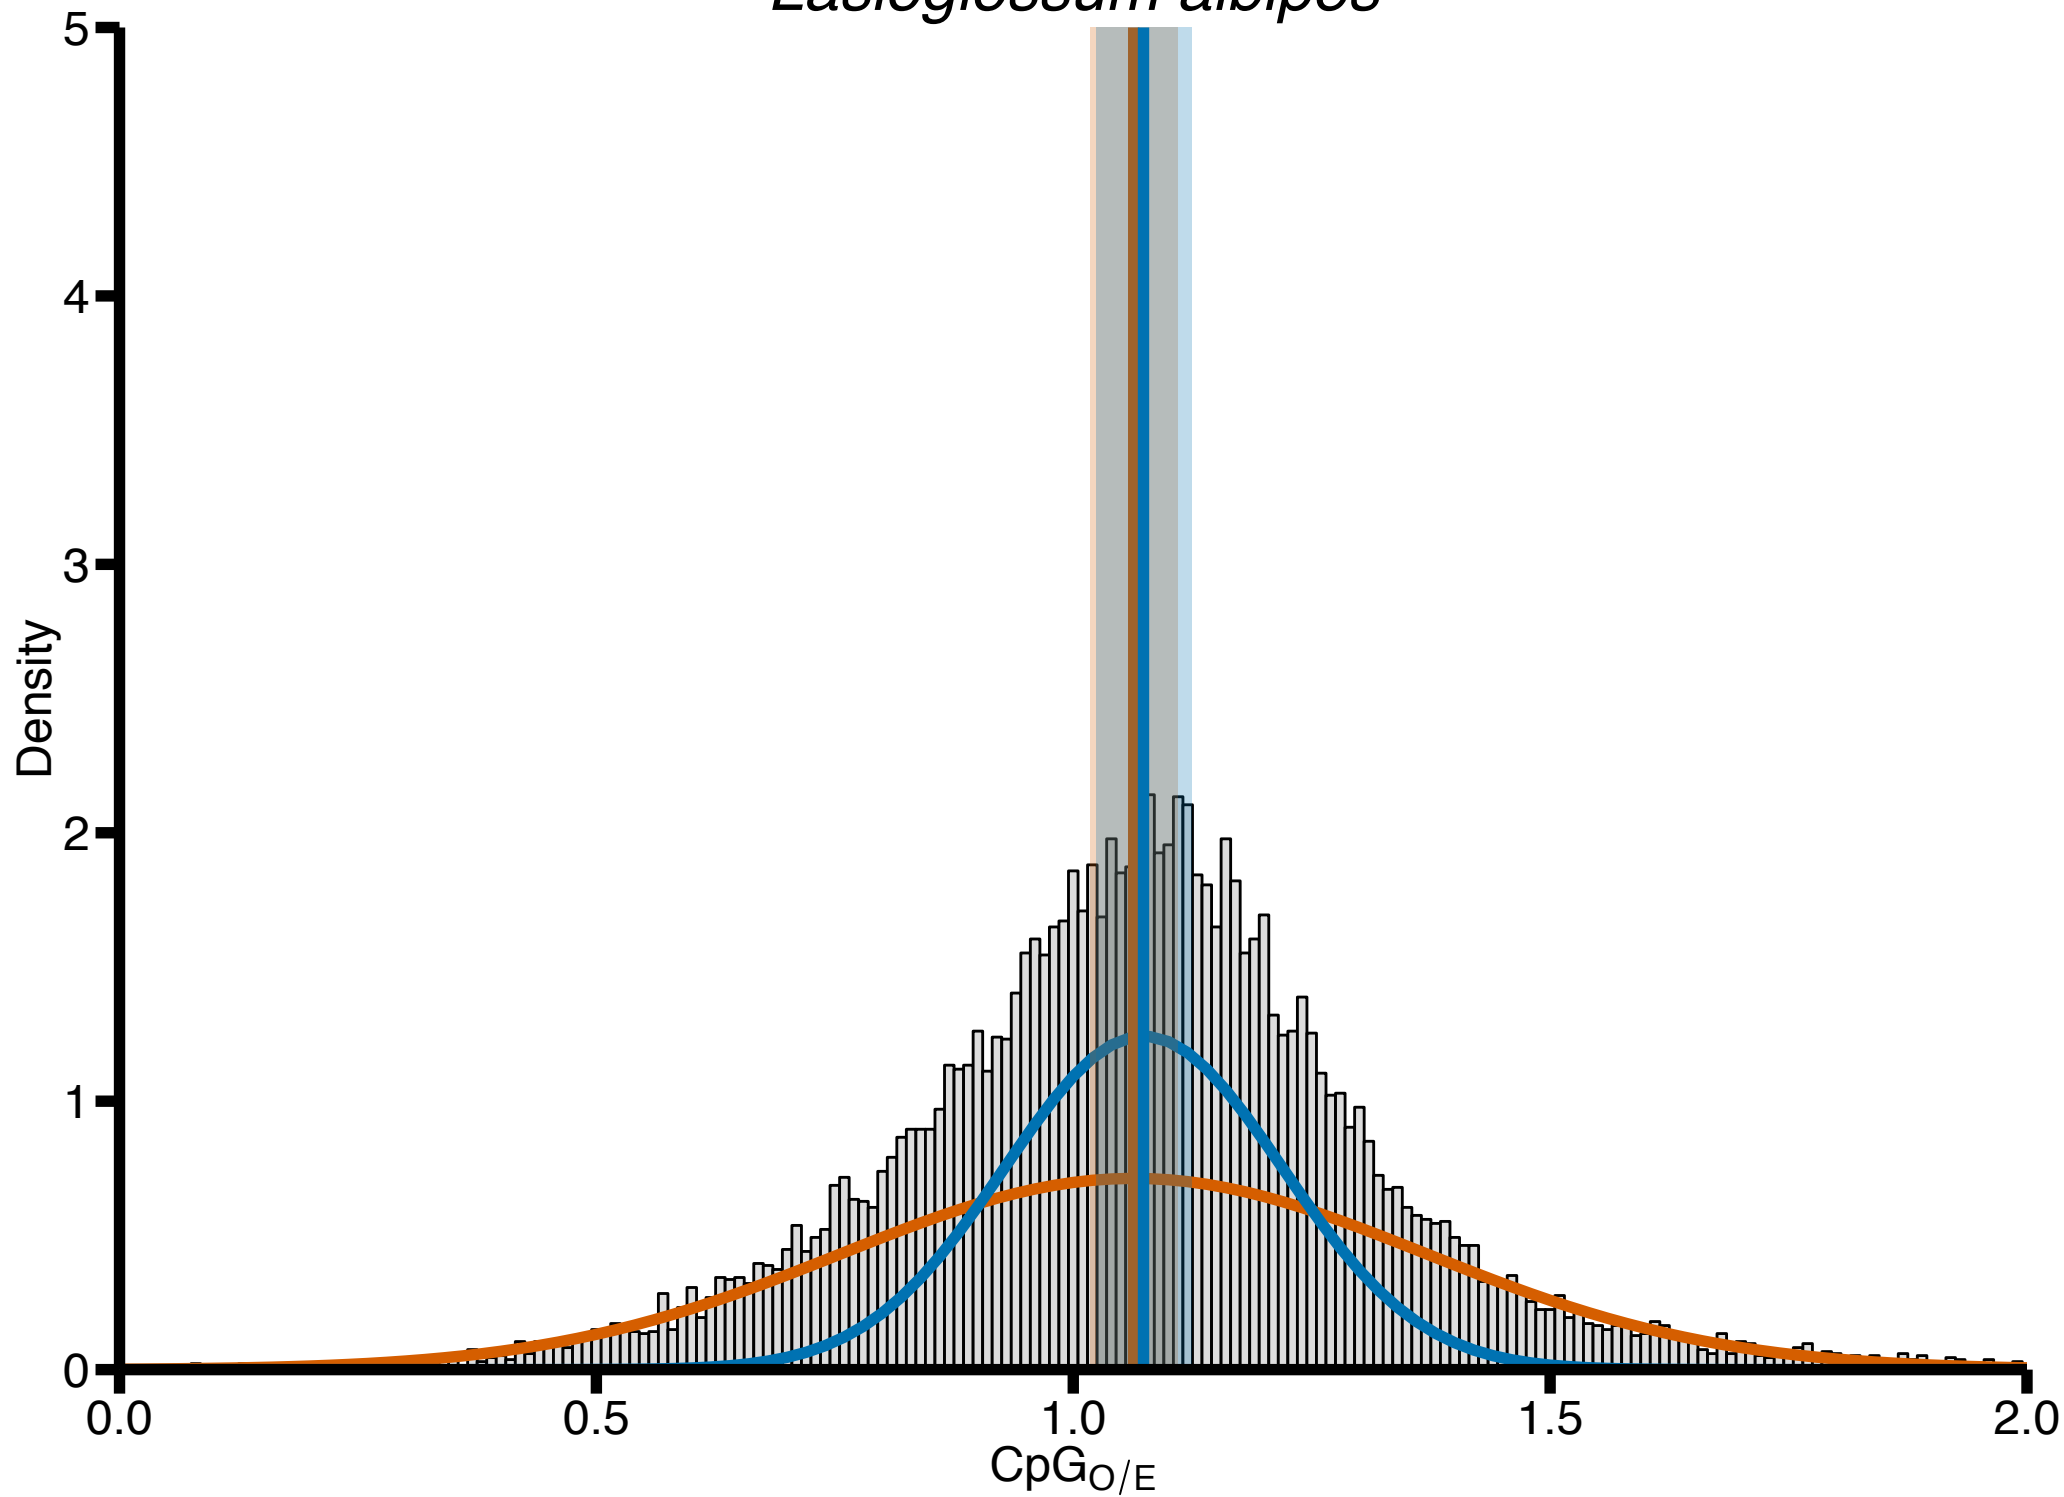

*Linepithema humile*

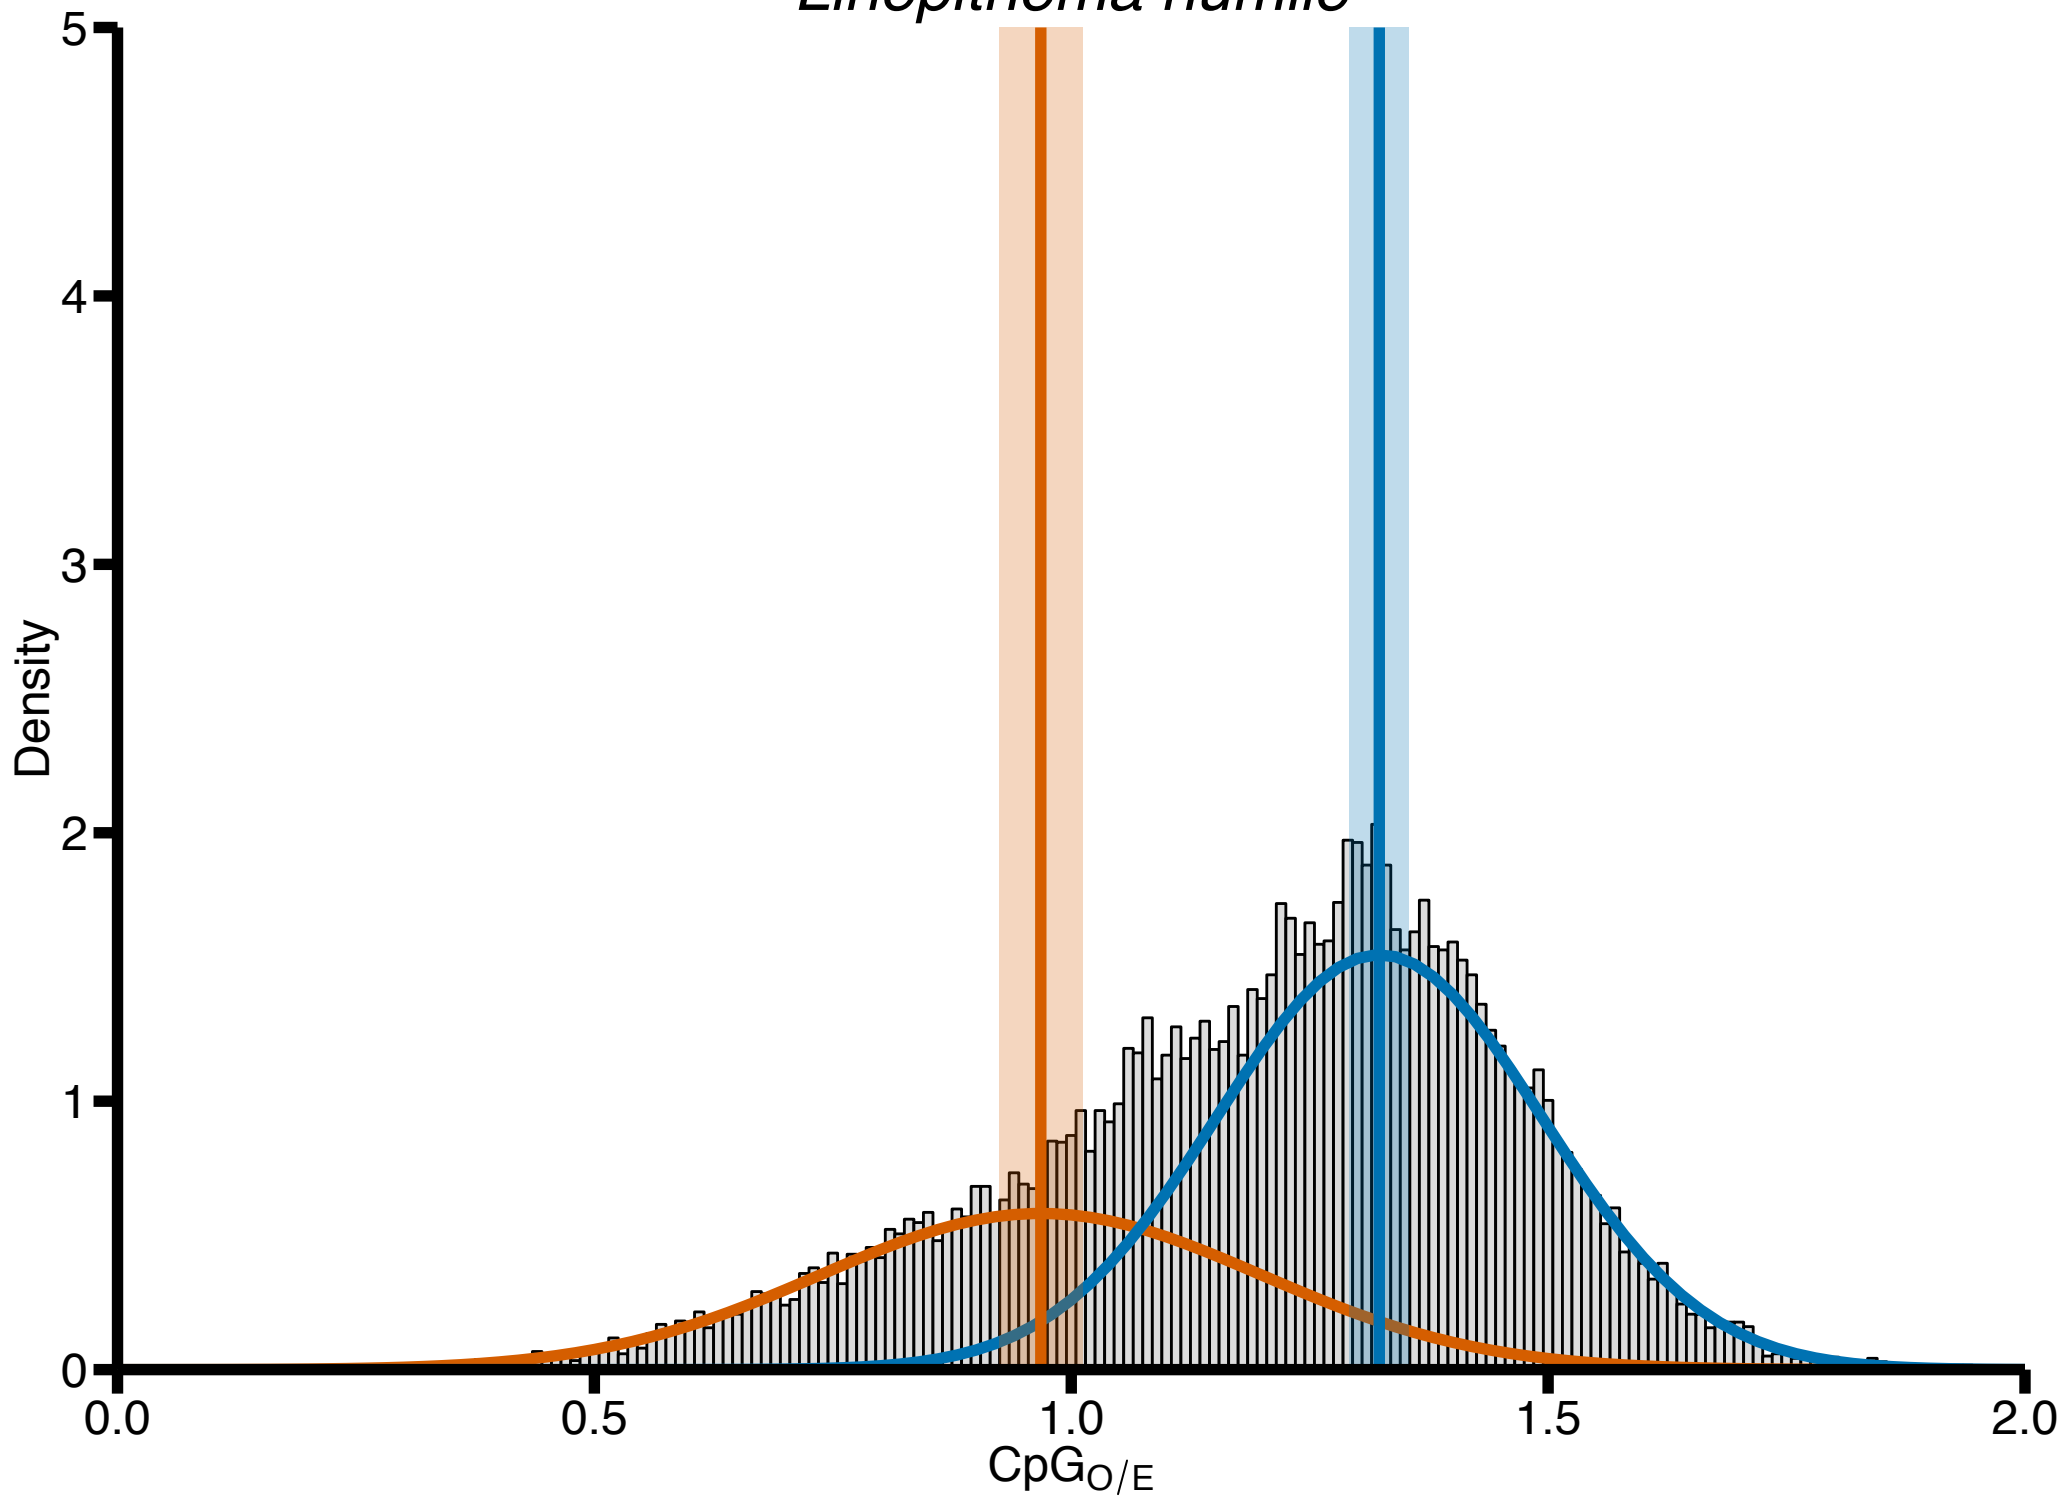



*Megachile rotundata*

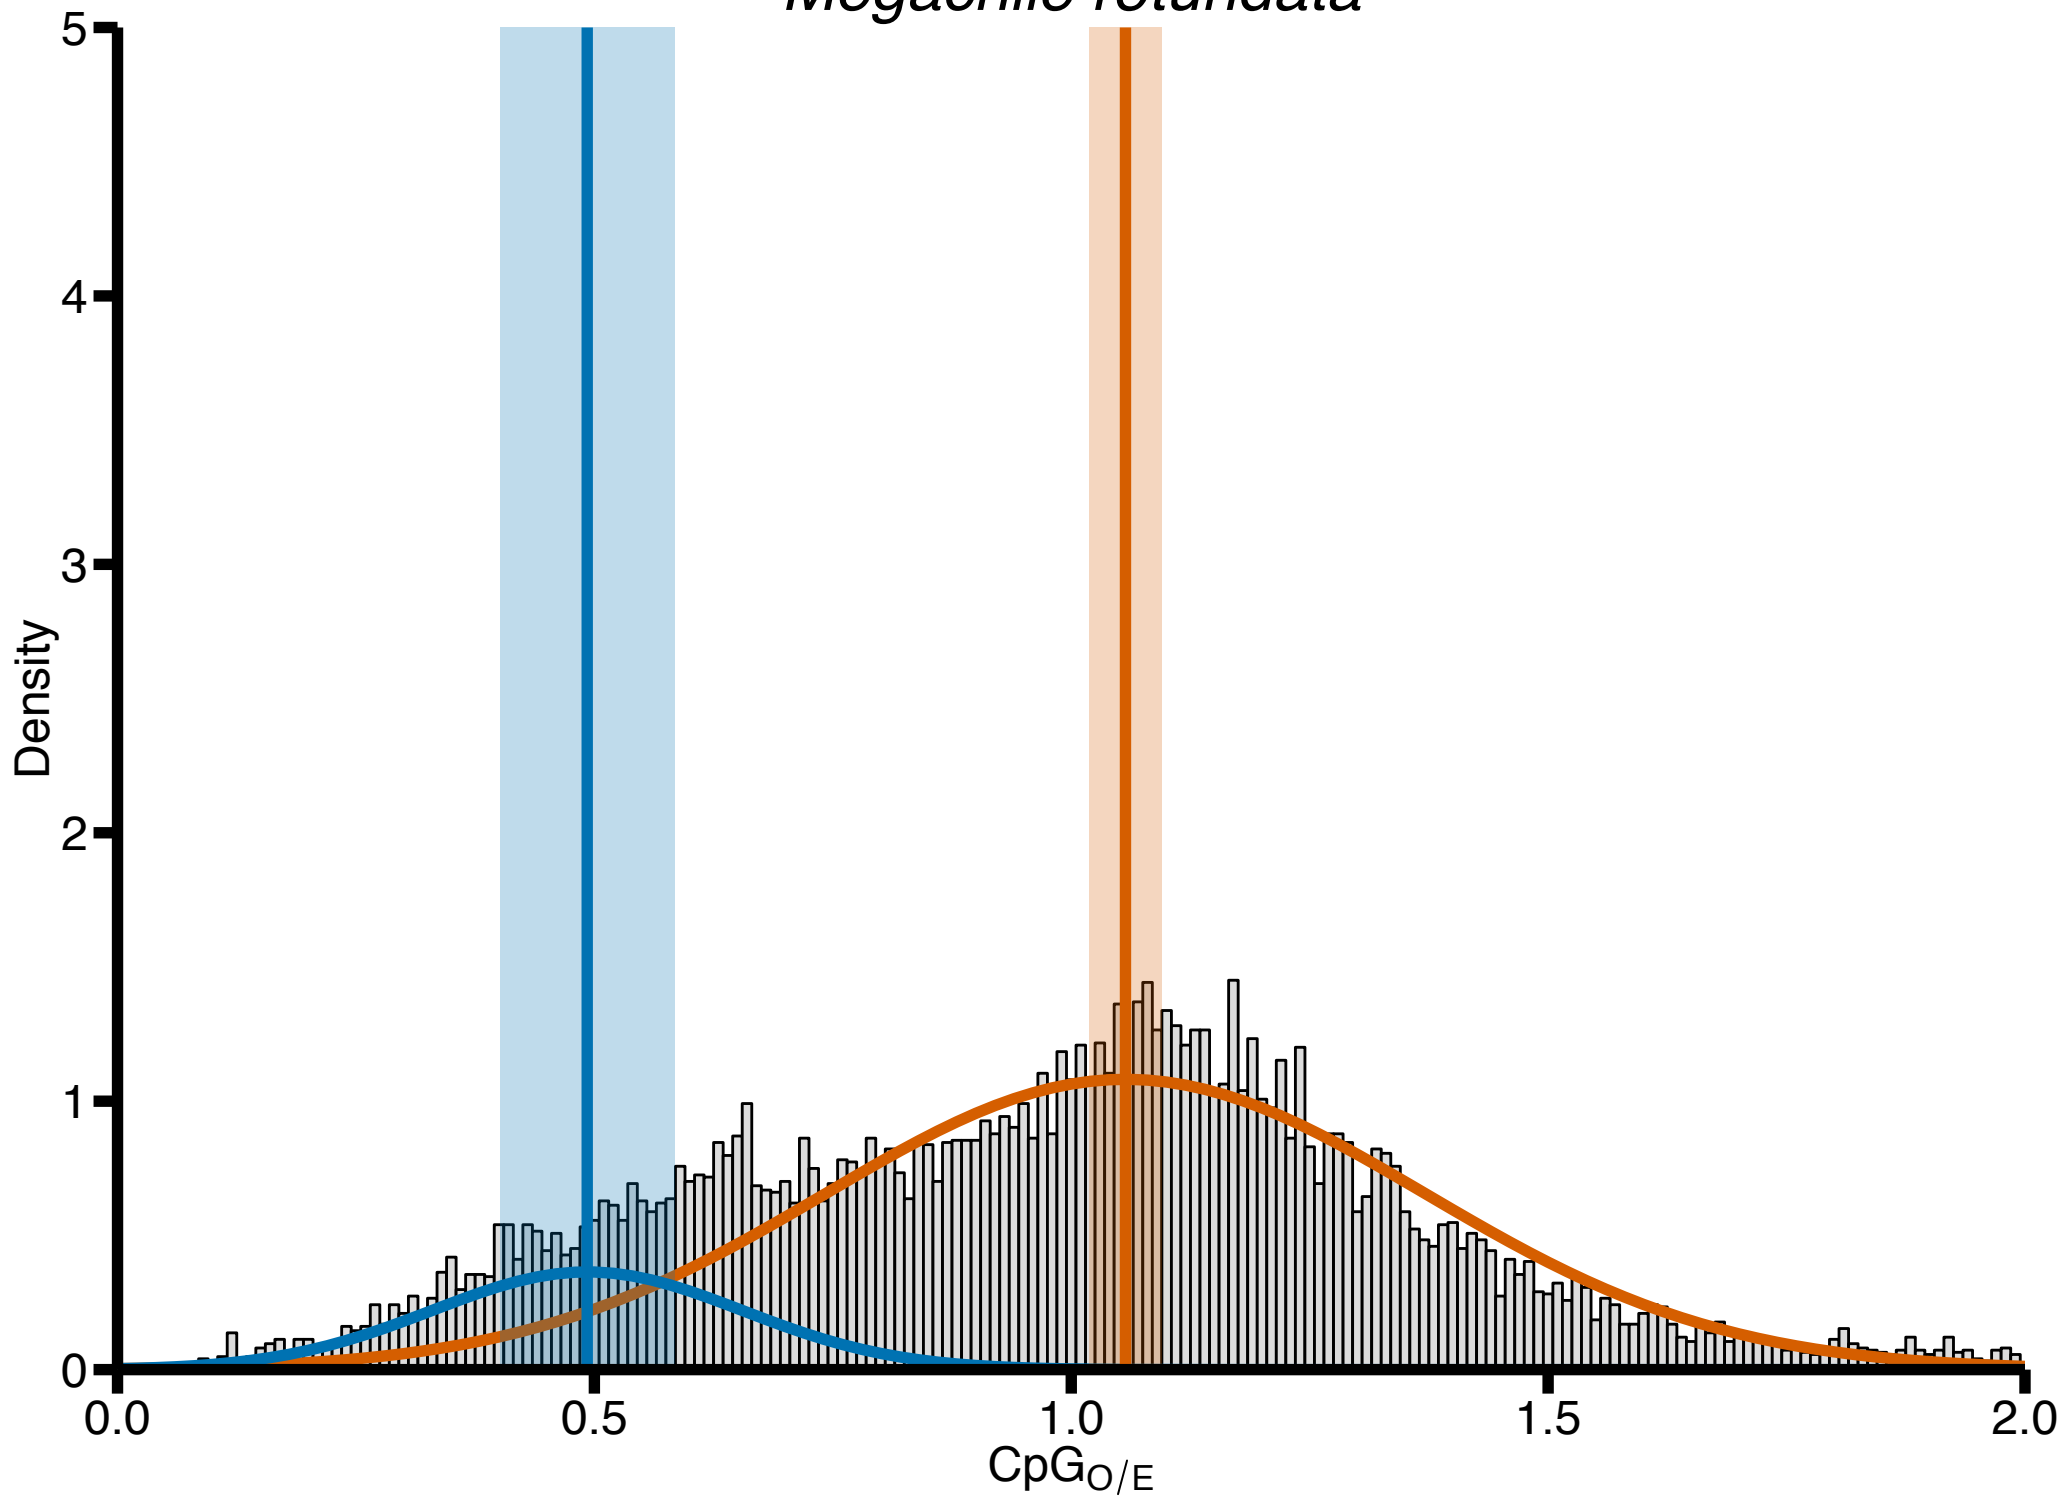

*Melipona quadrifasciata*

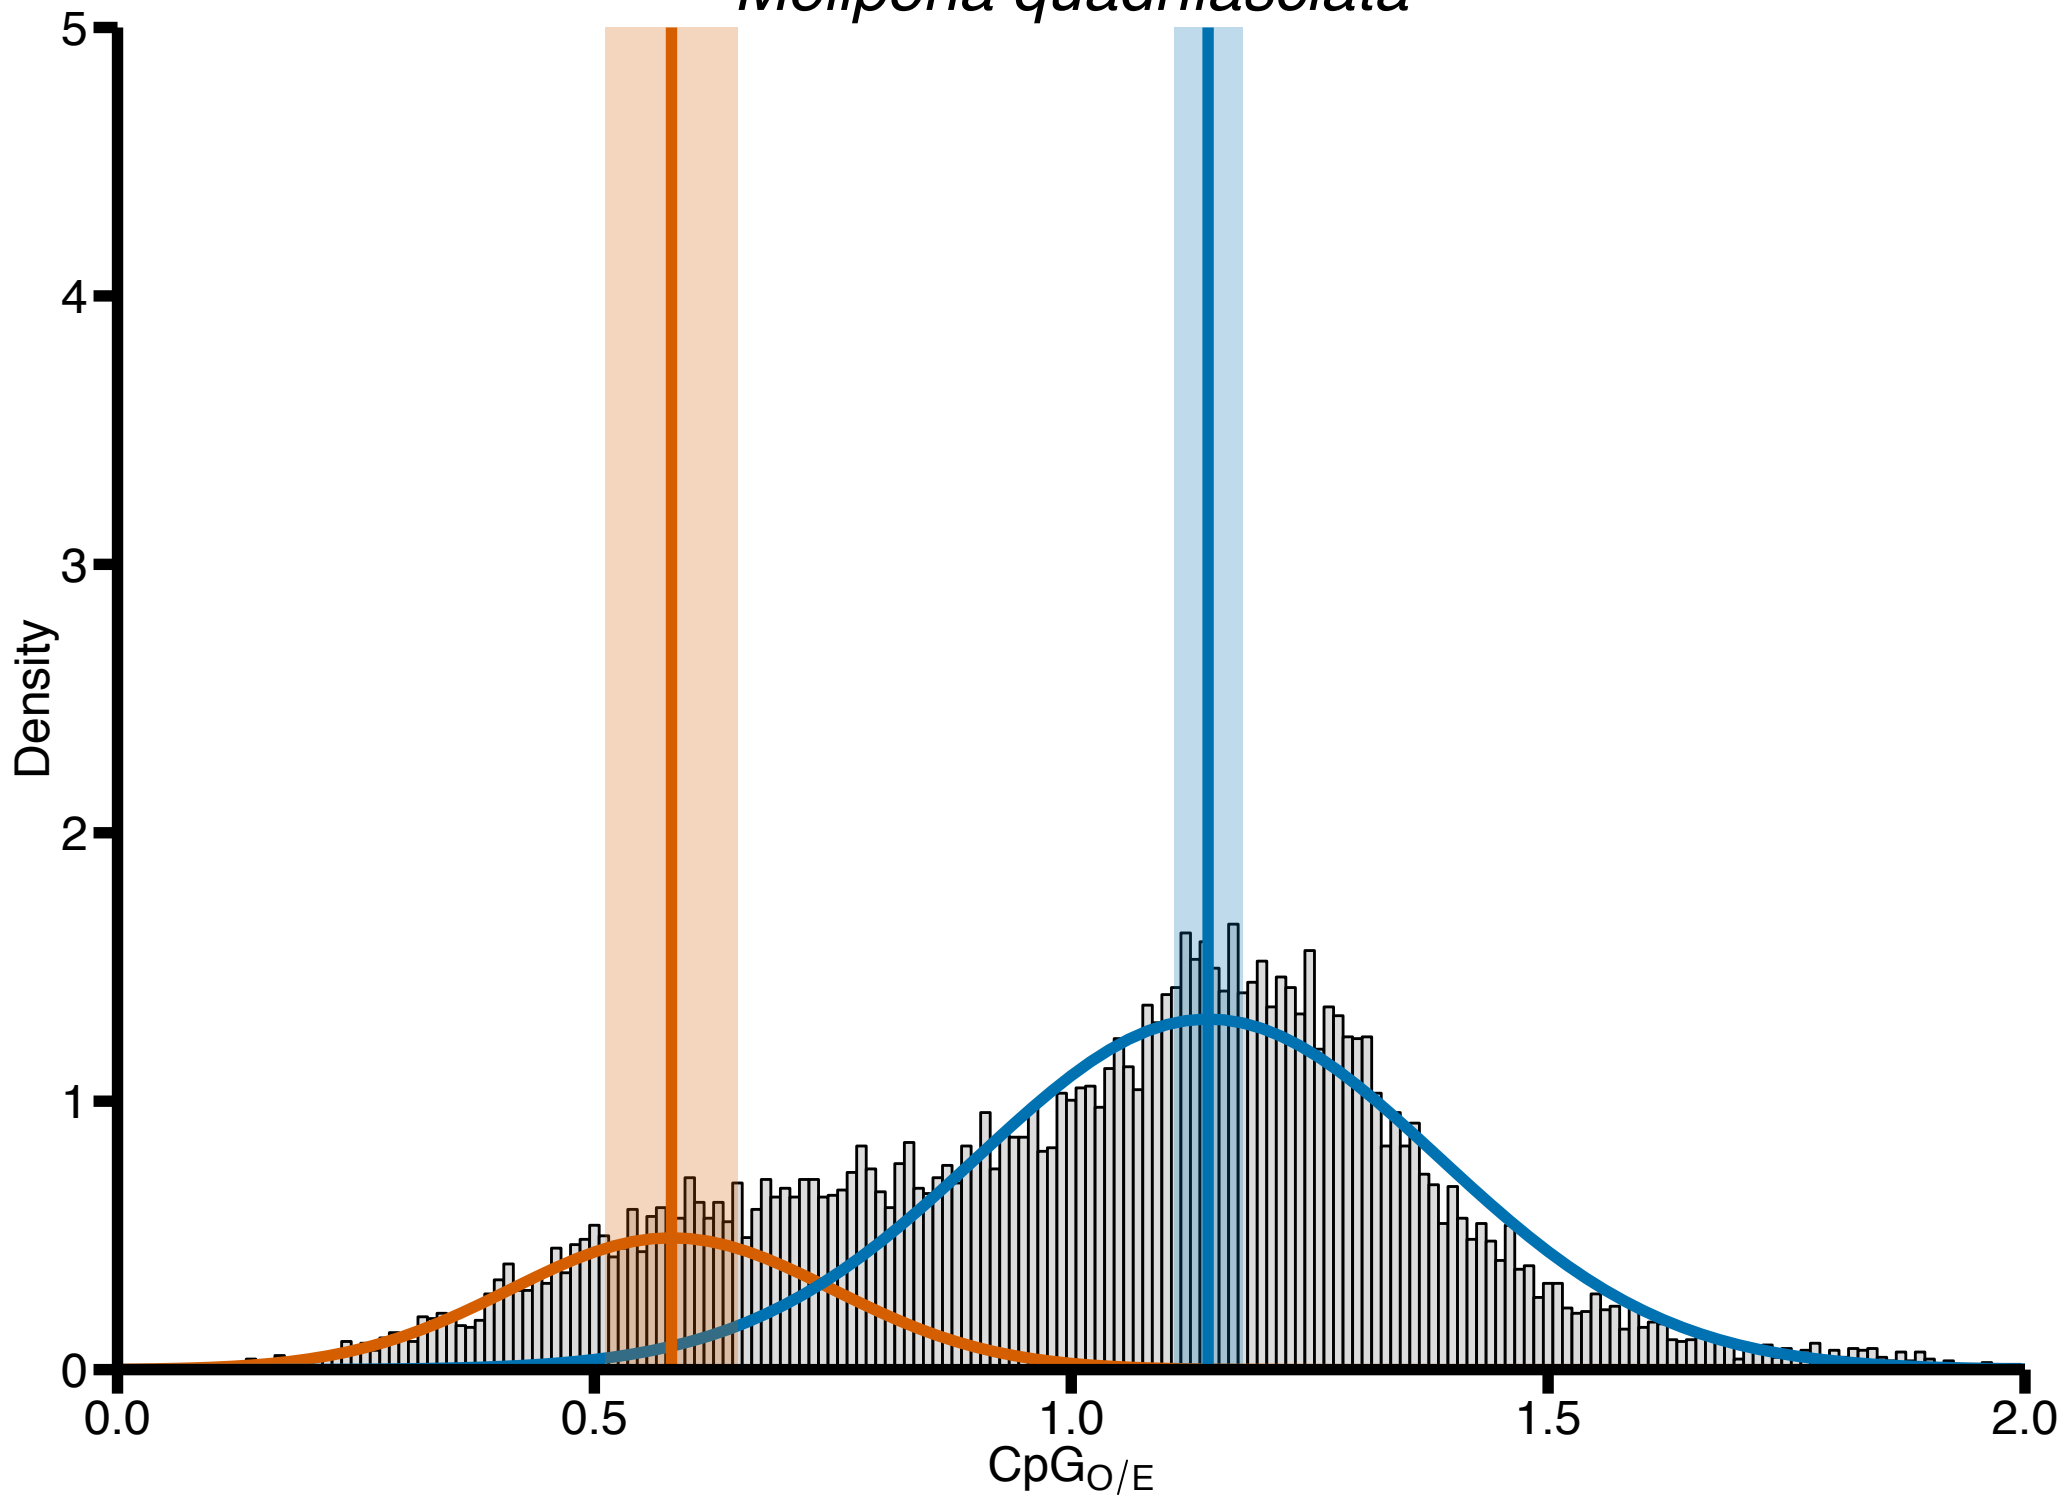

*Microplitis demolitor*

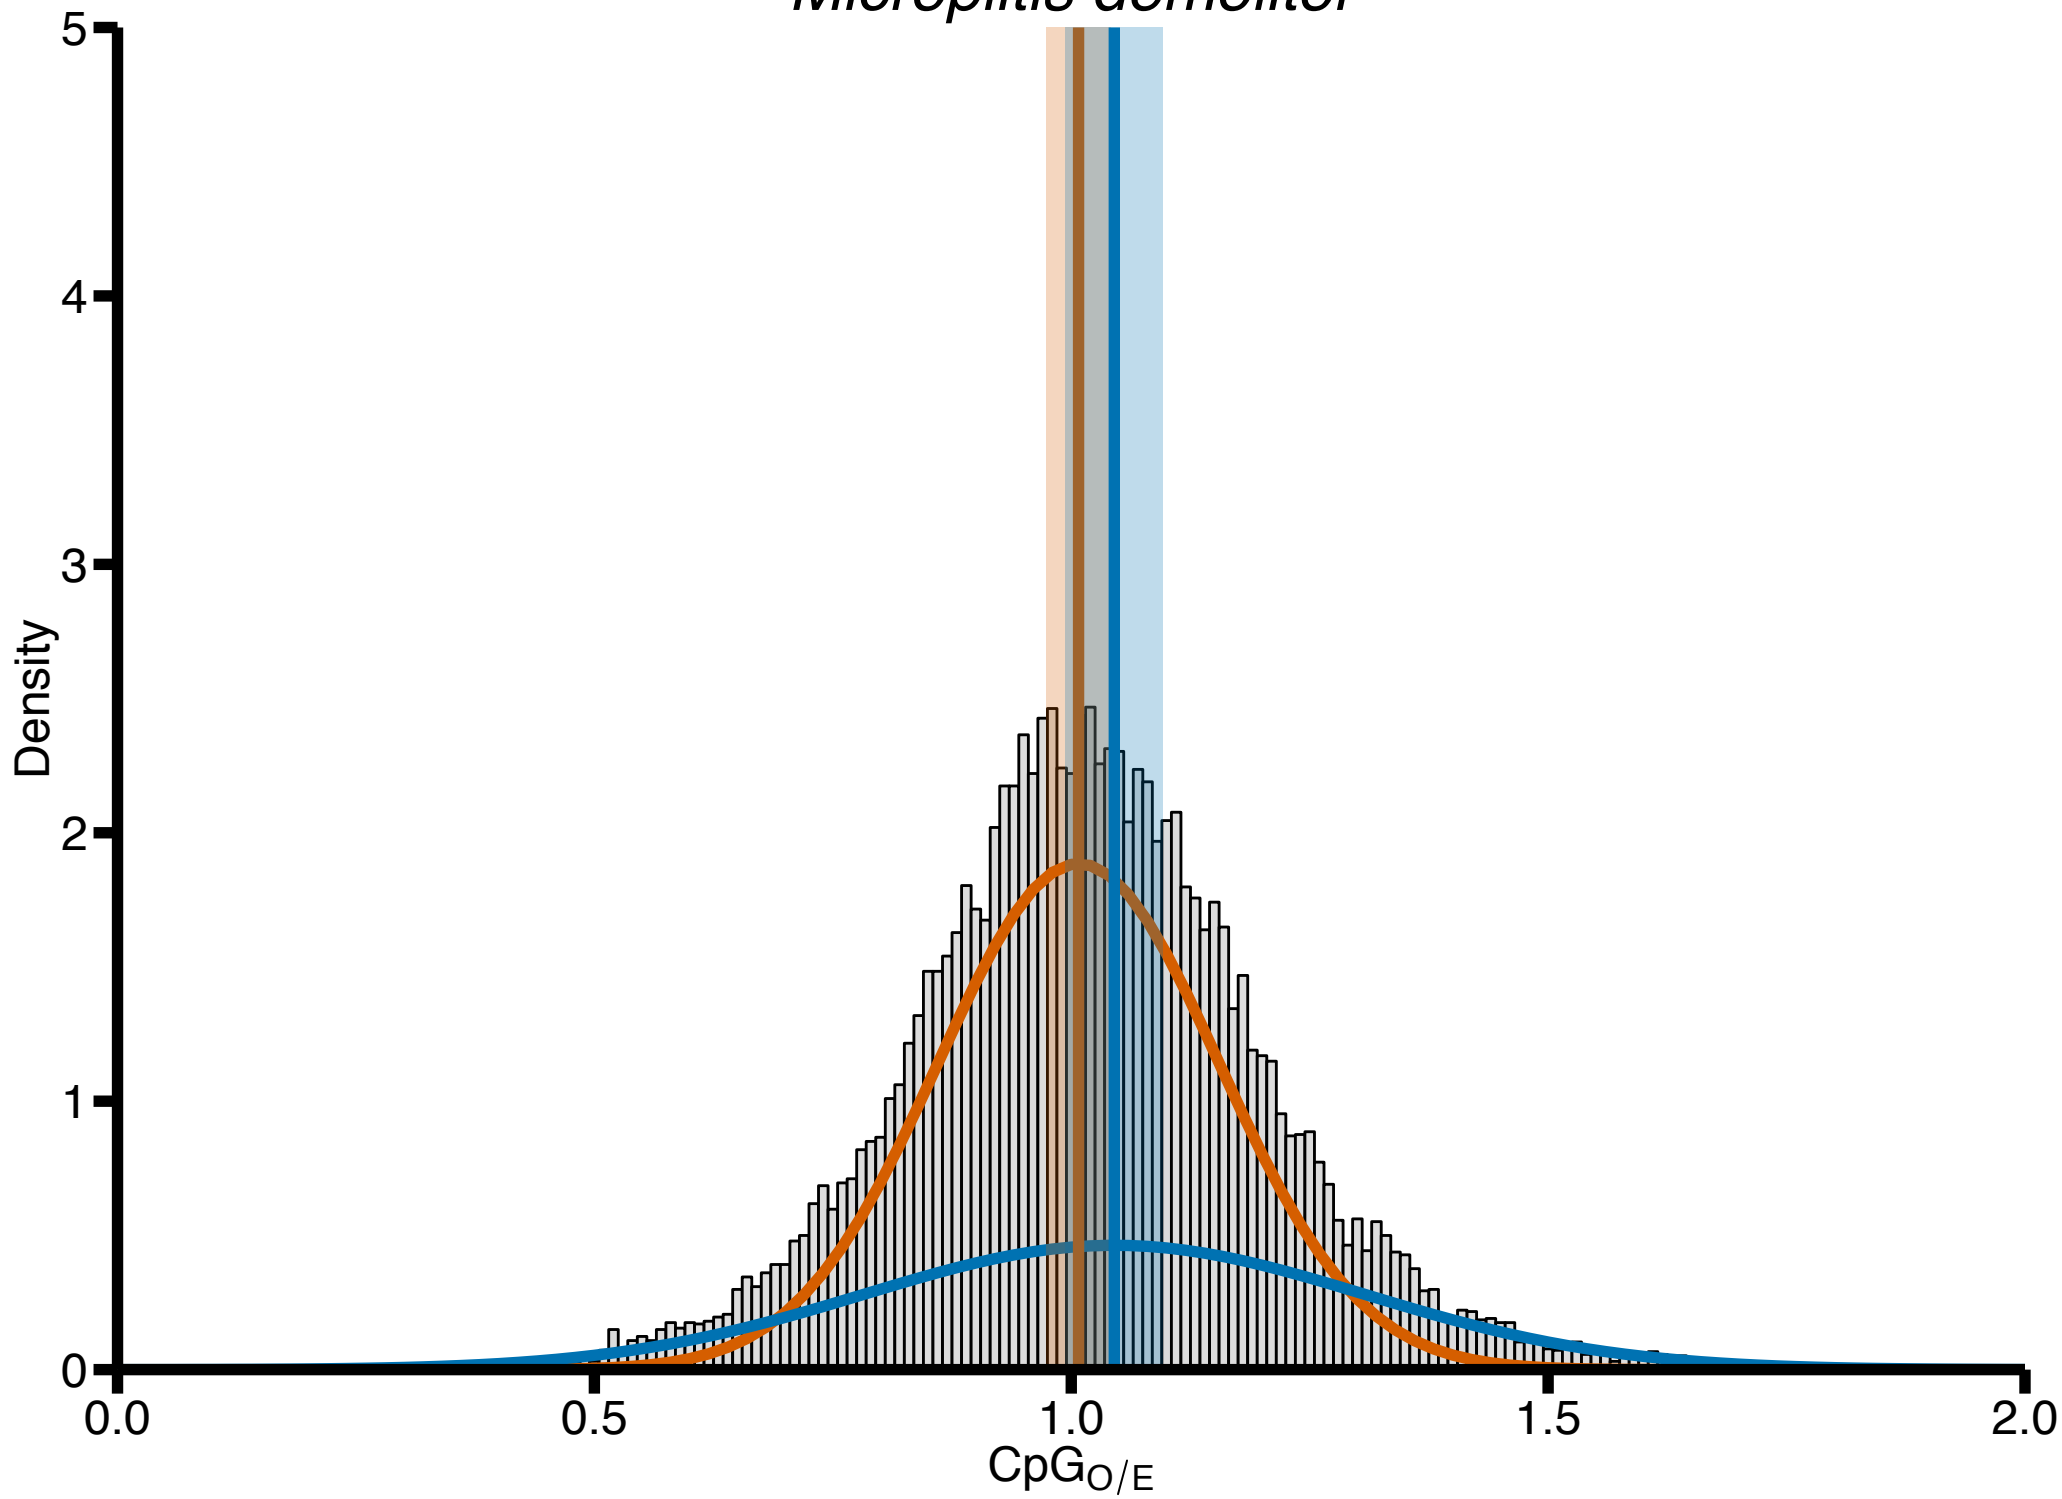

*Monomorium pharaonis*

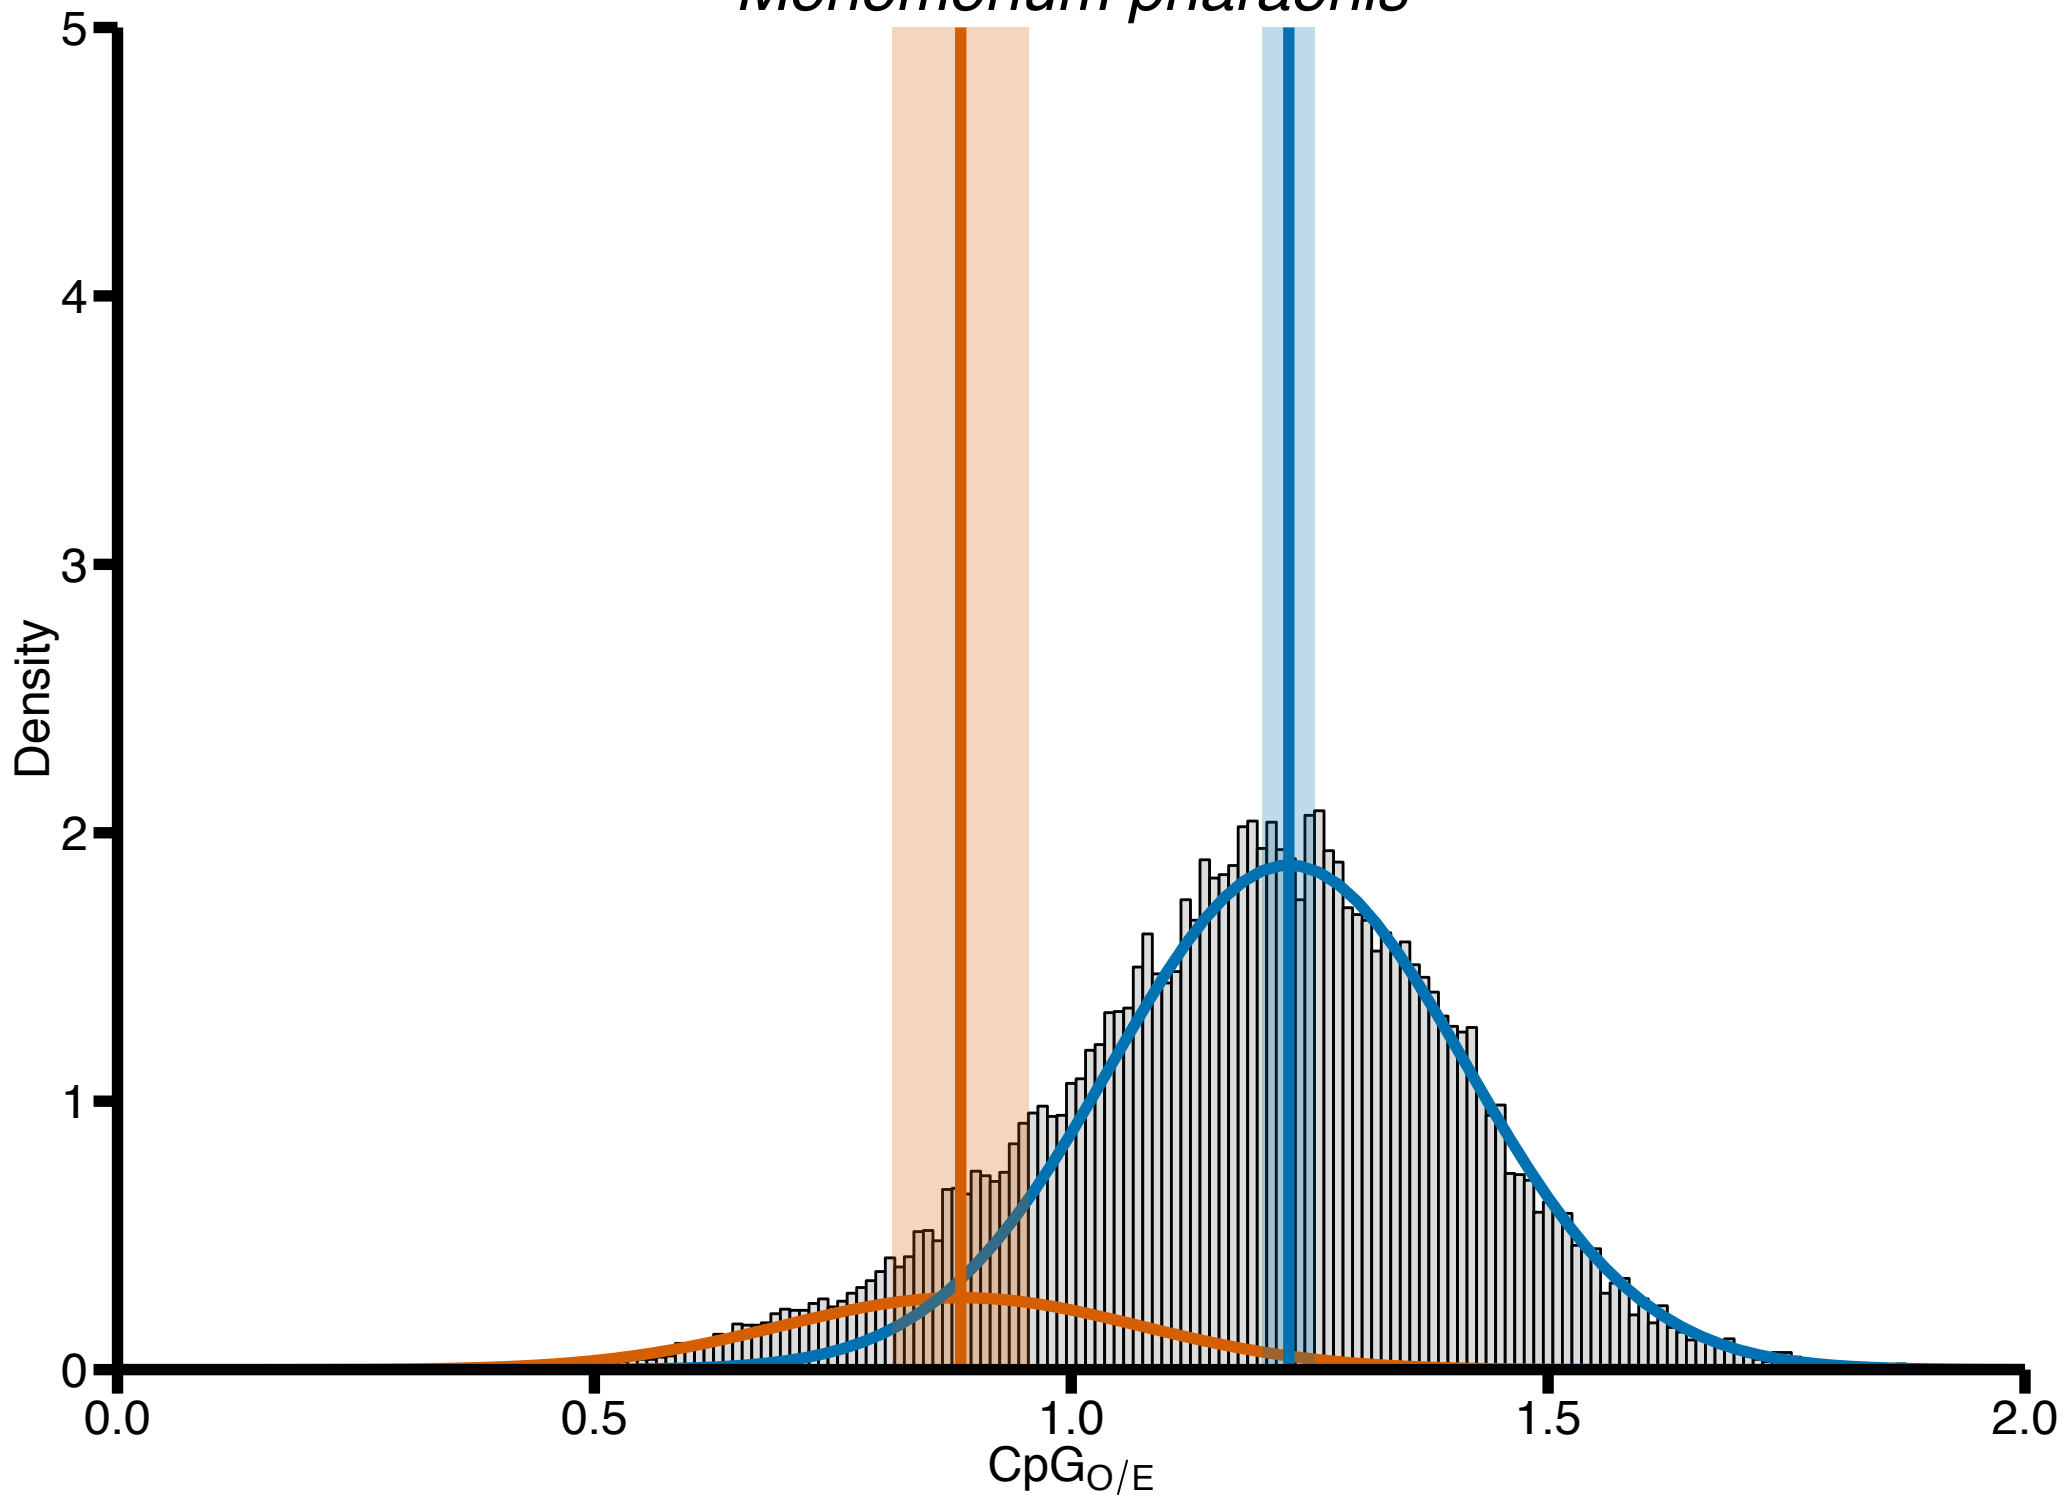

*Nasonia vitripennis*

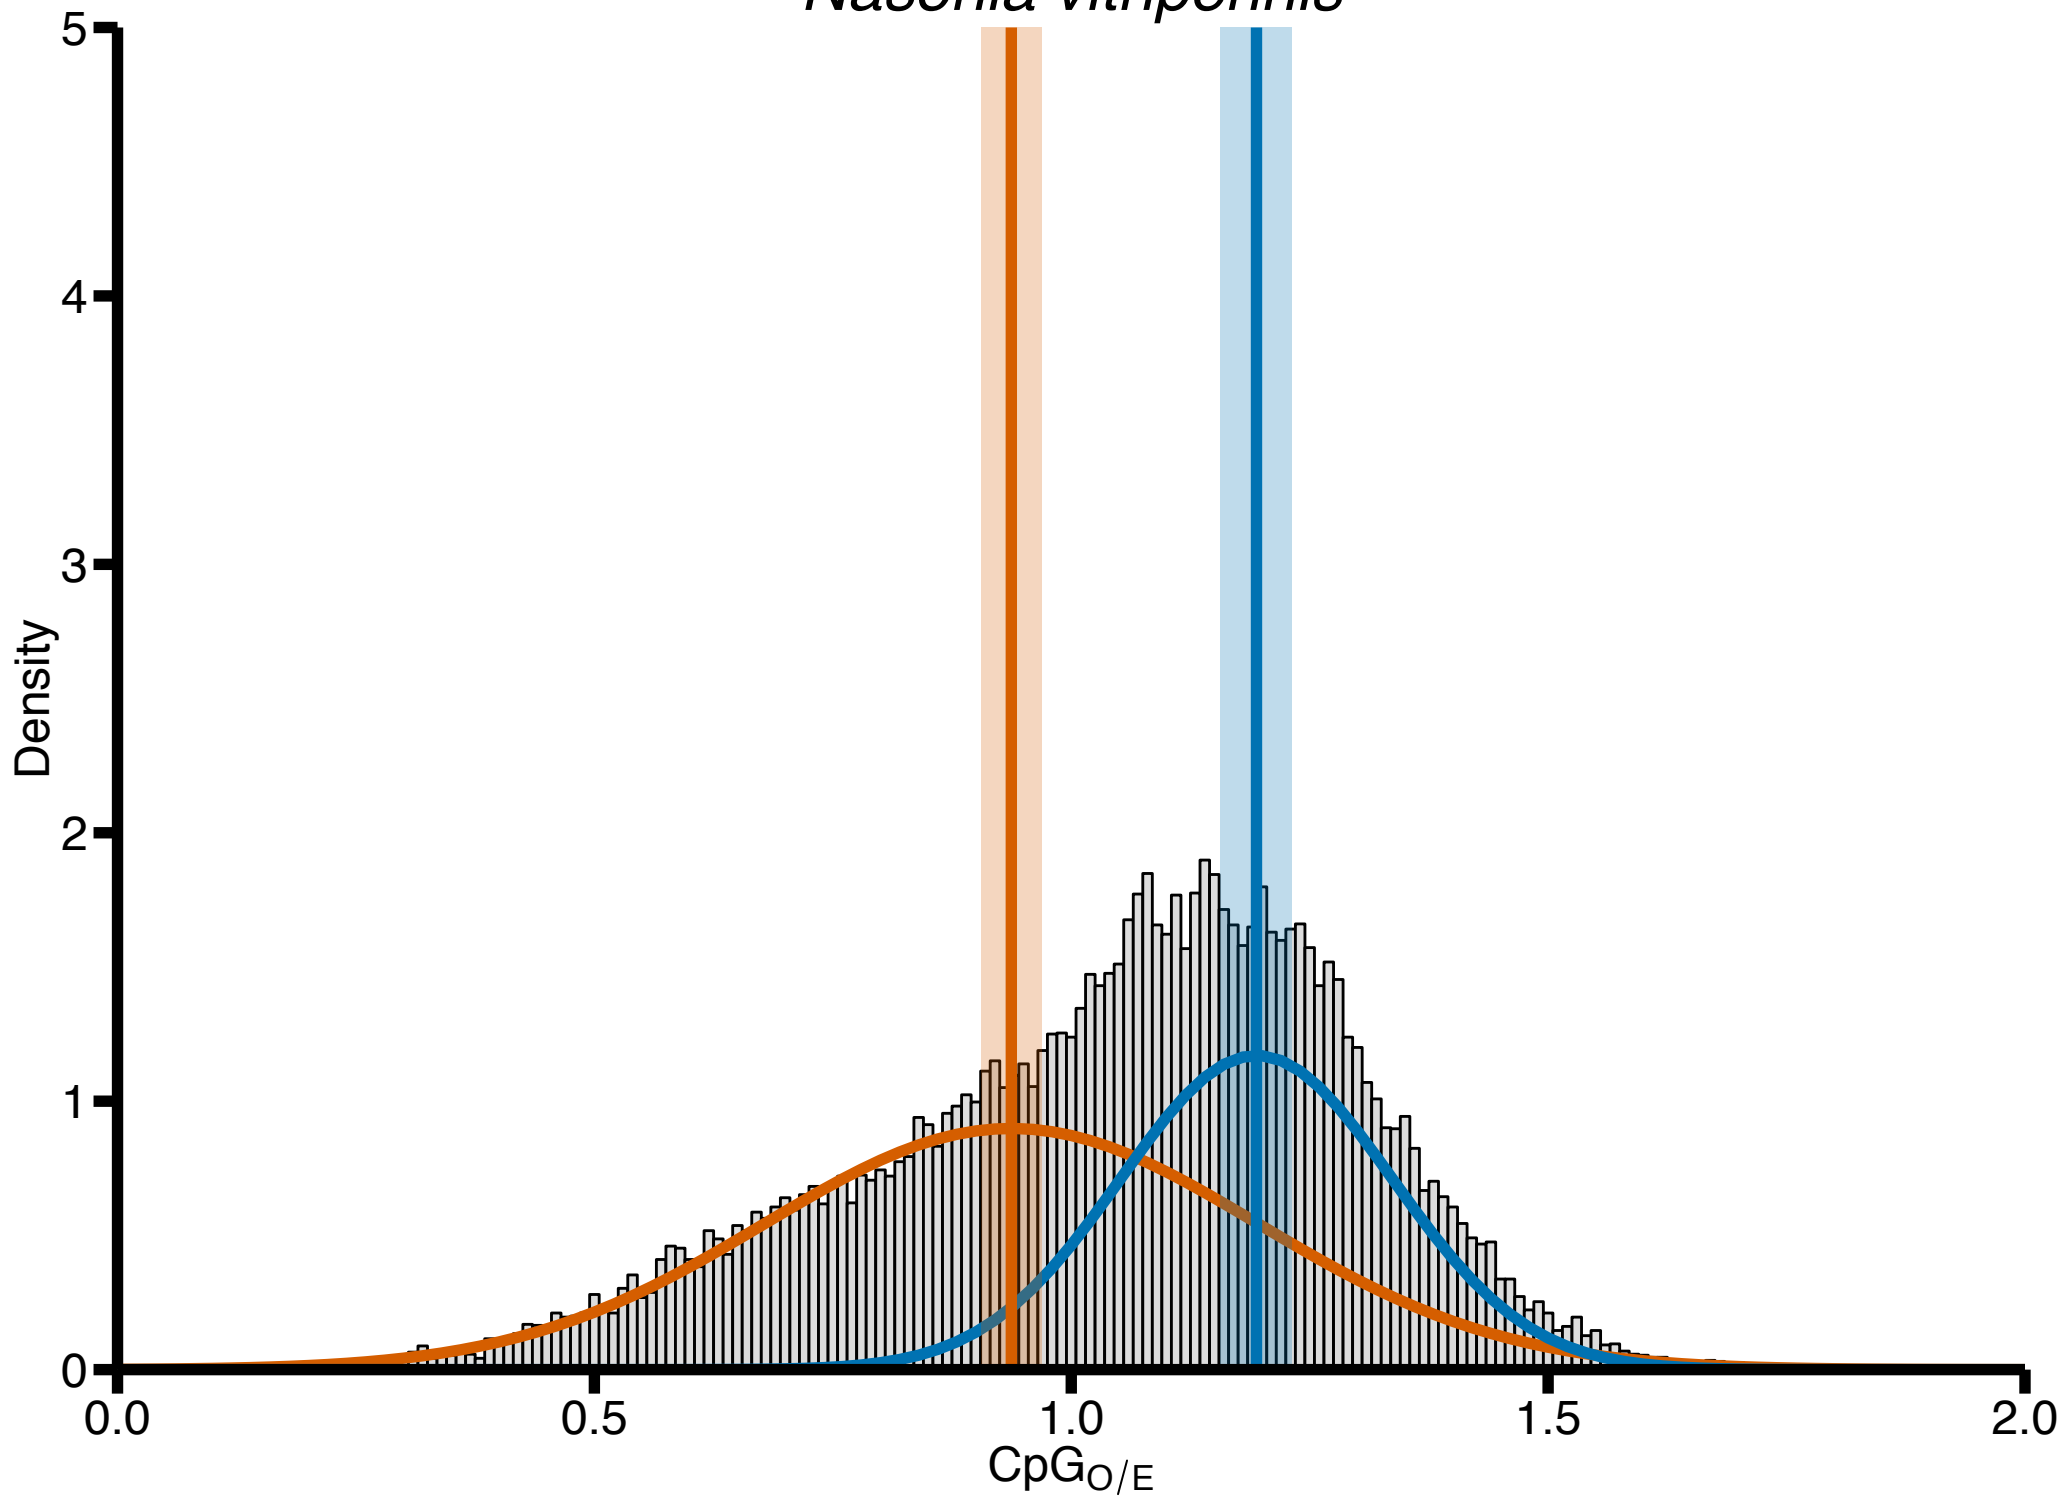

*Orussus abietinus*

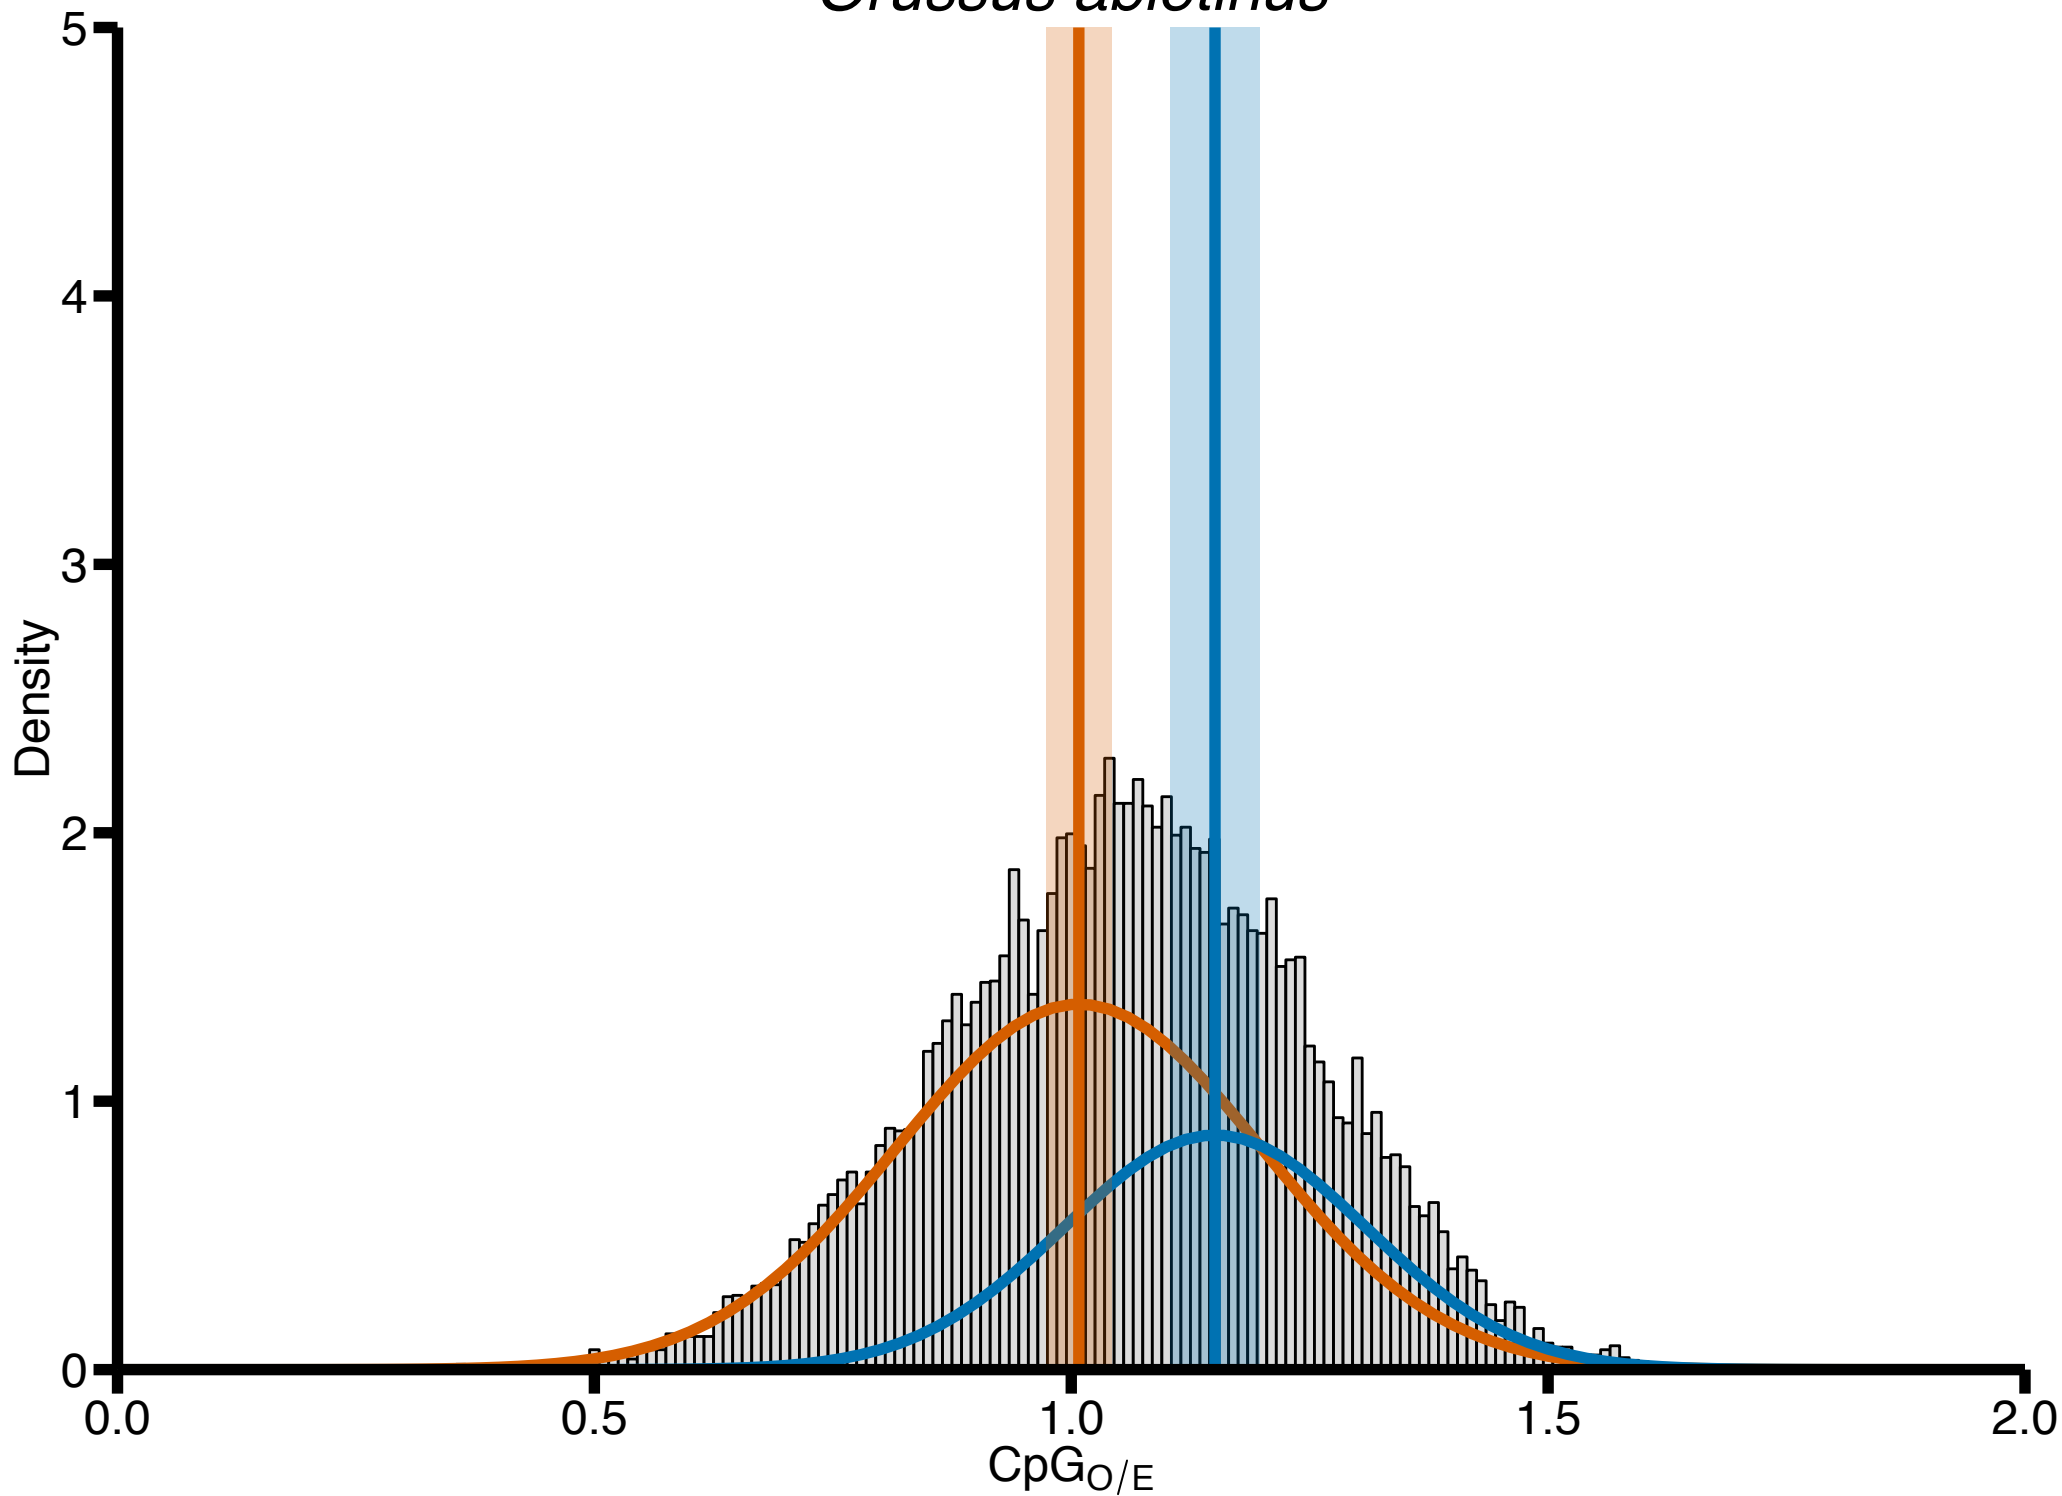

*Pogonomyrmex barbatus*

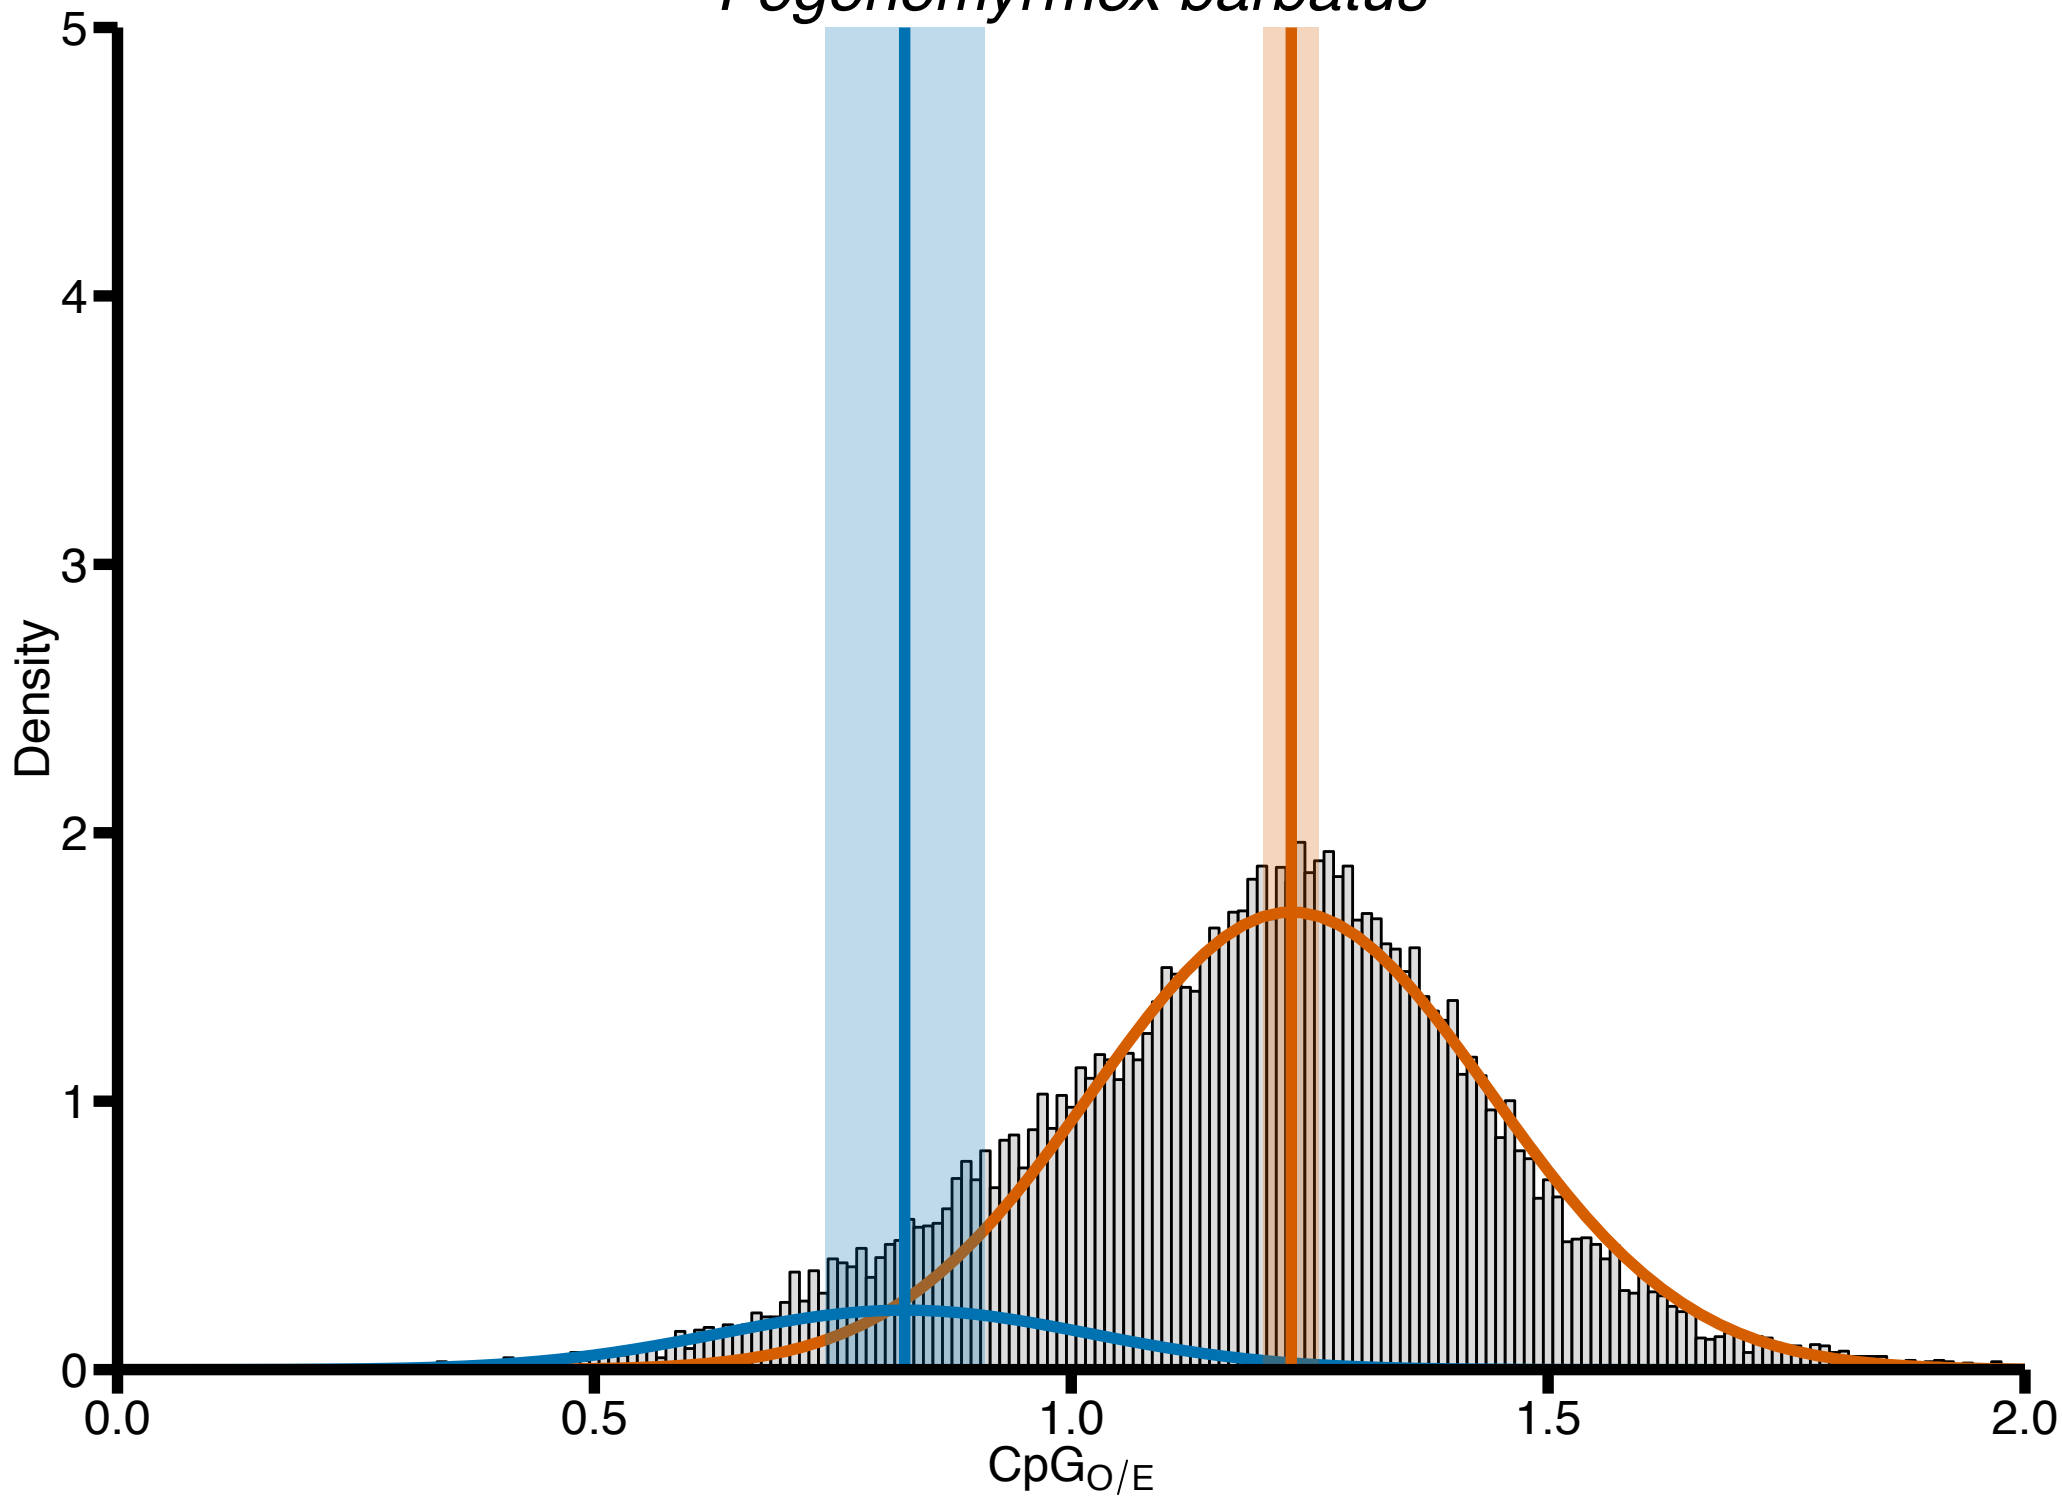

*Polistes canadensis*

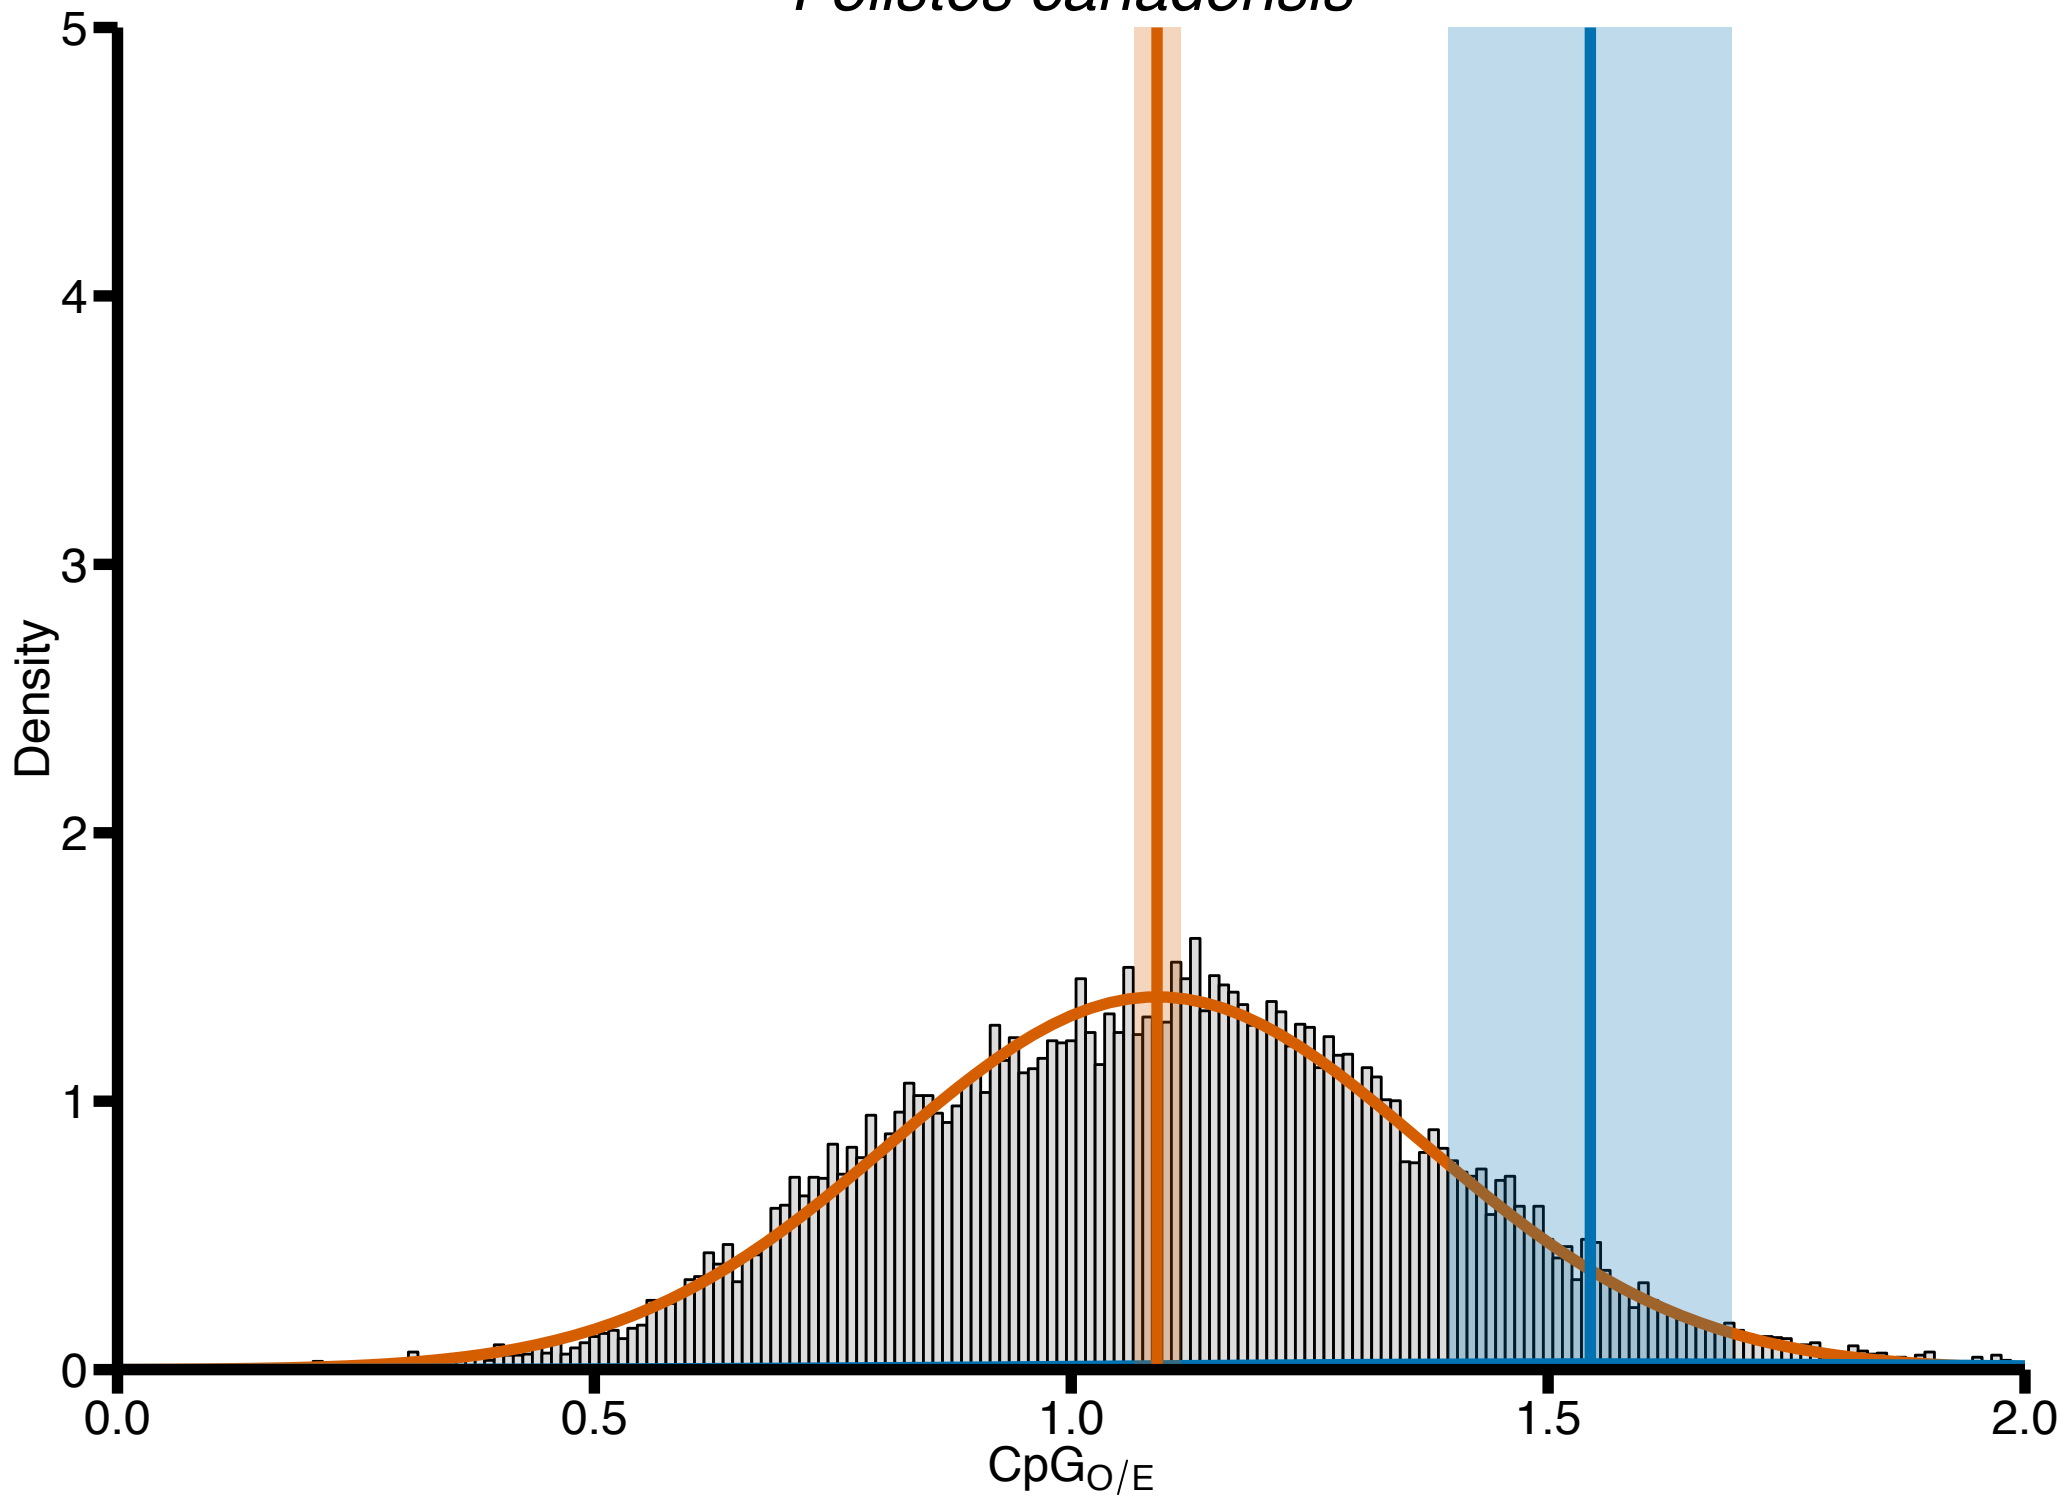



*Solenopsis invicta*

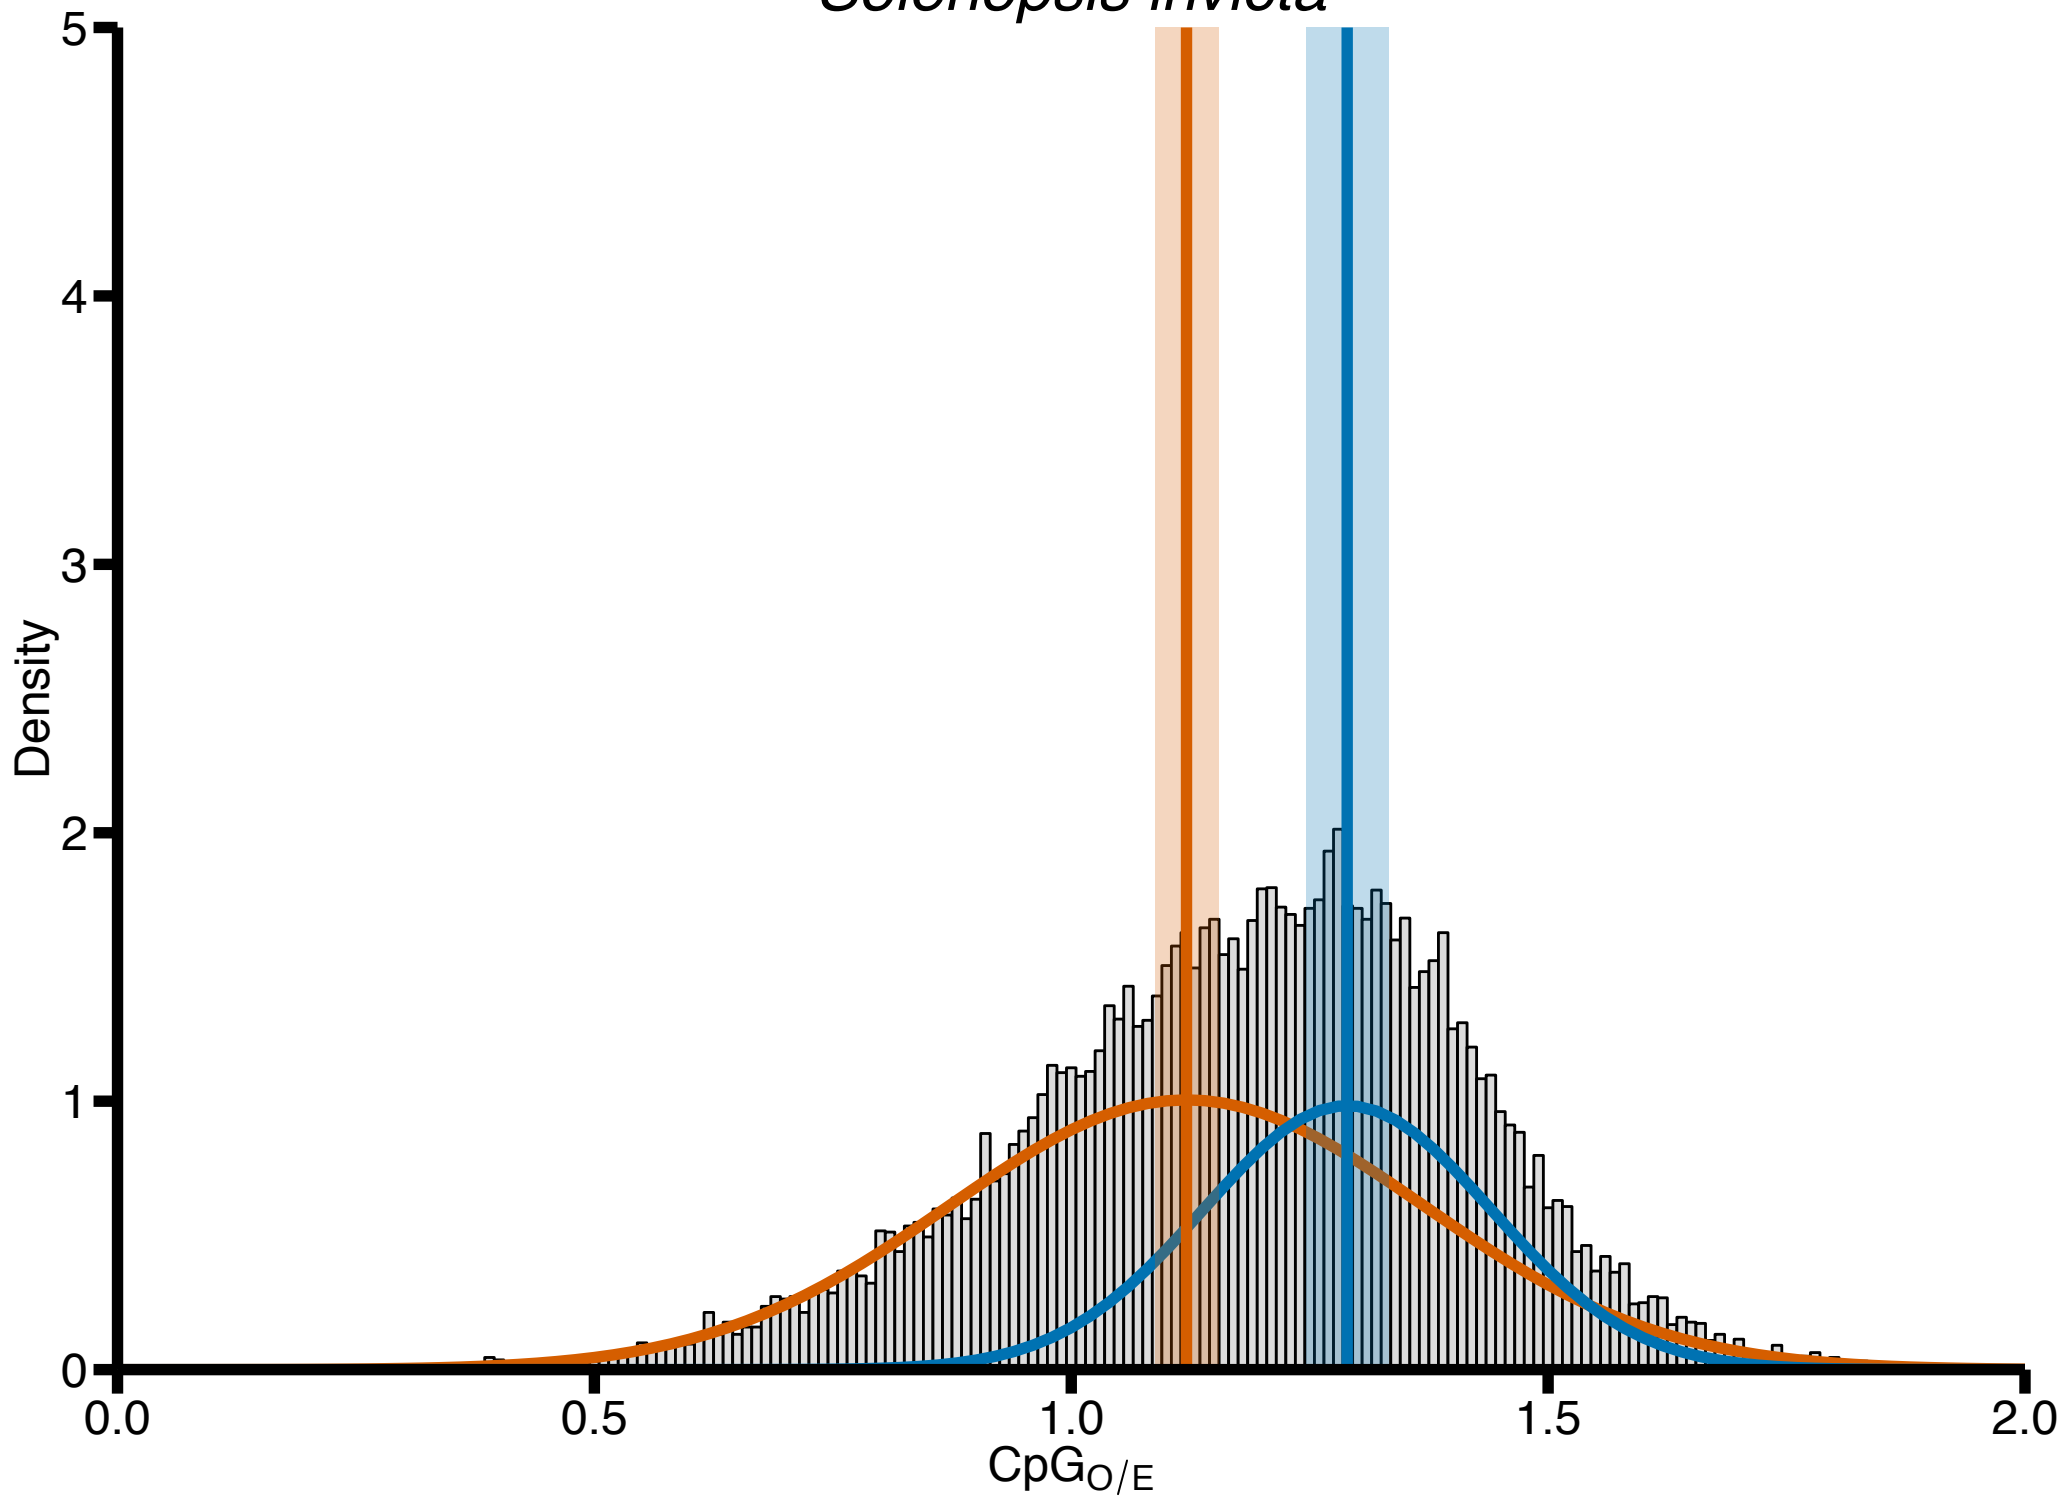

*Trichogramma pretiosum*

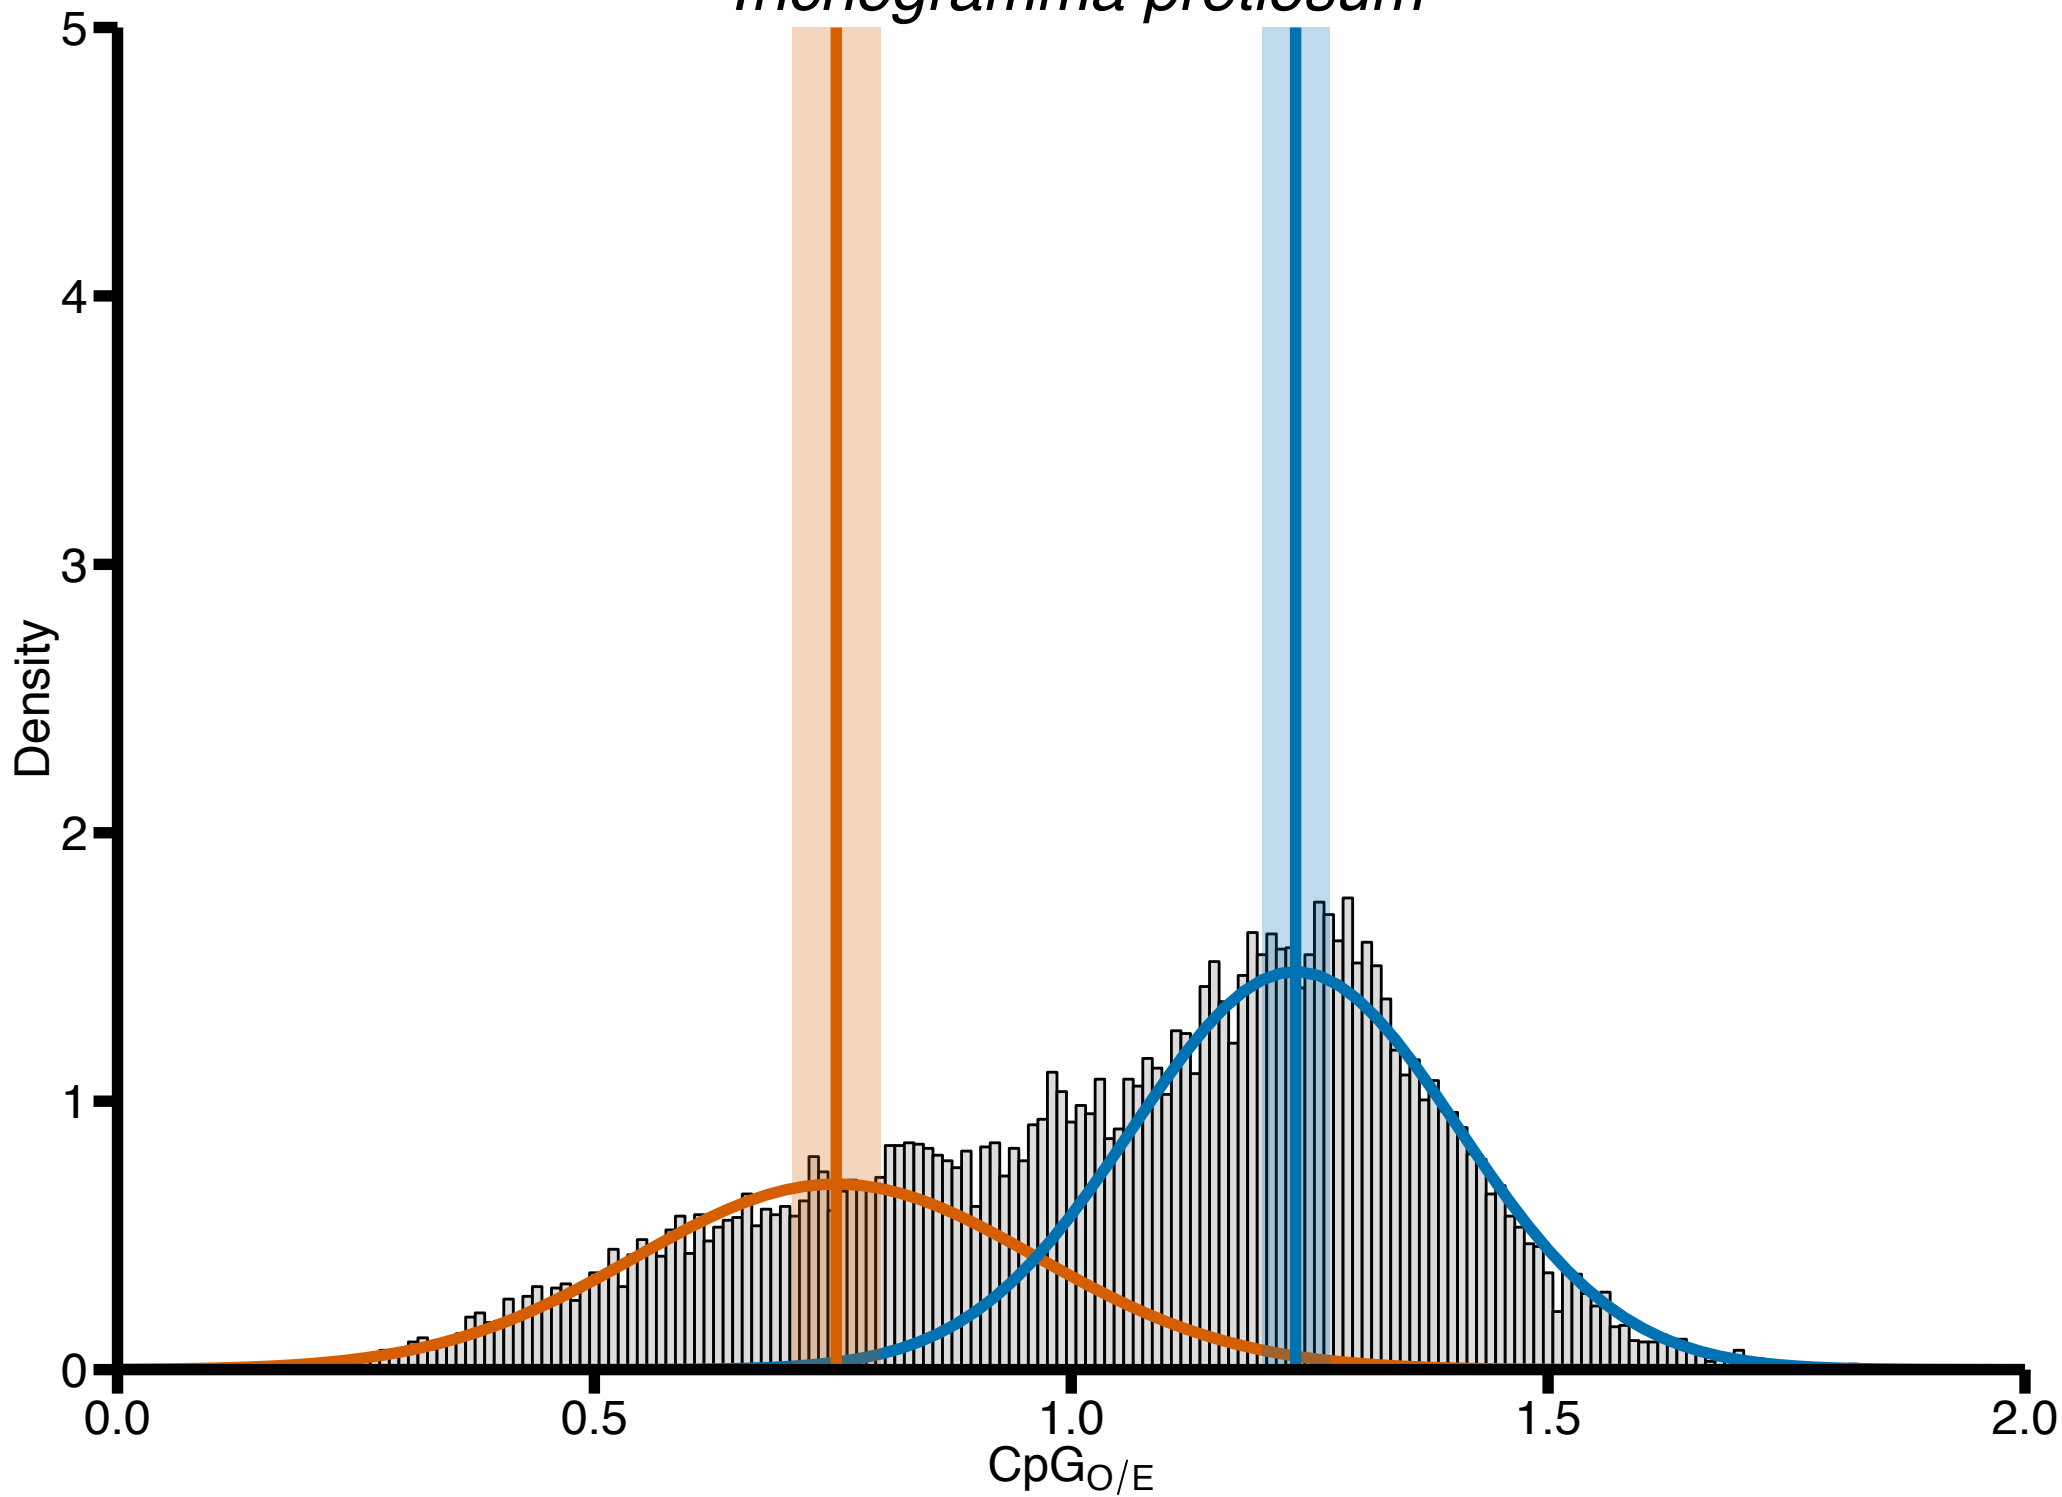

*Vollenhovia emeryi*

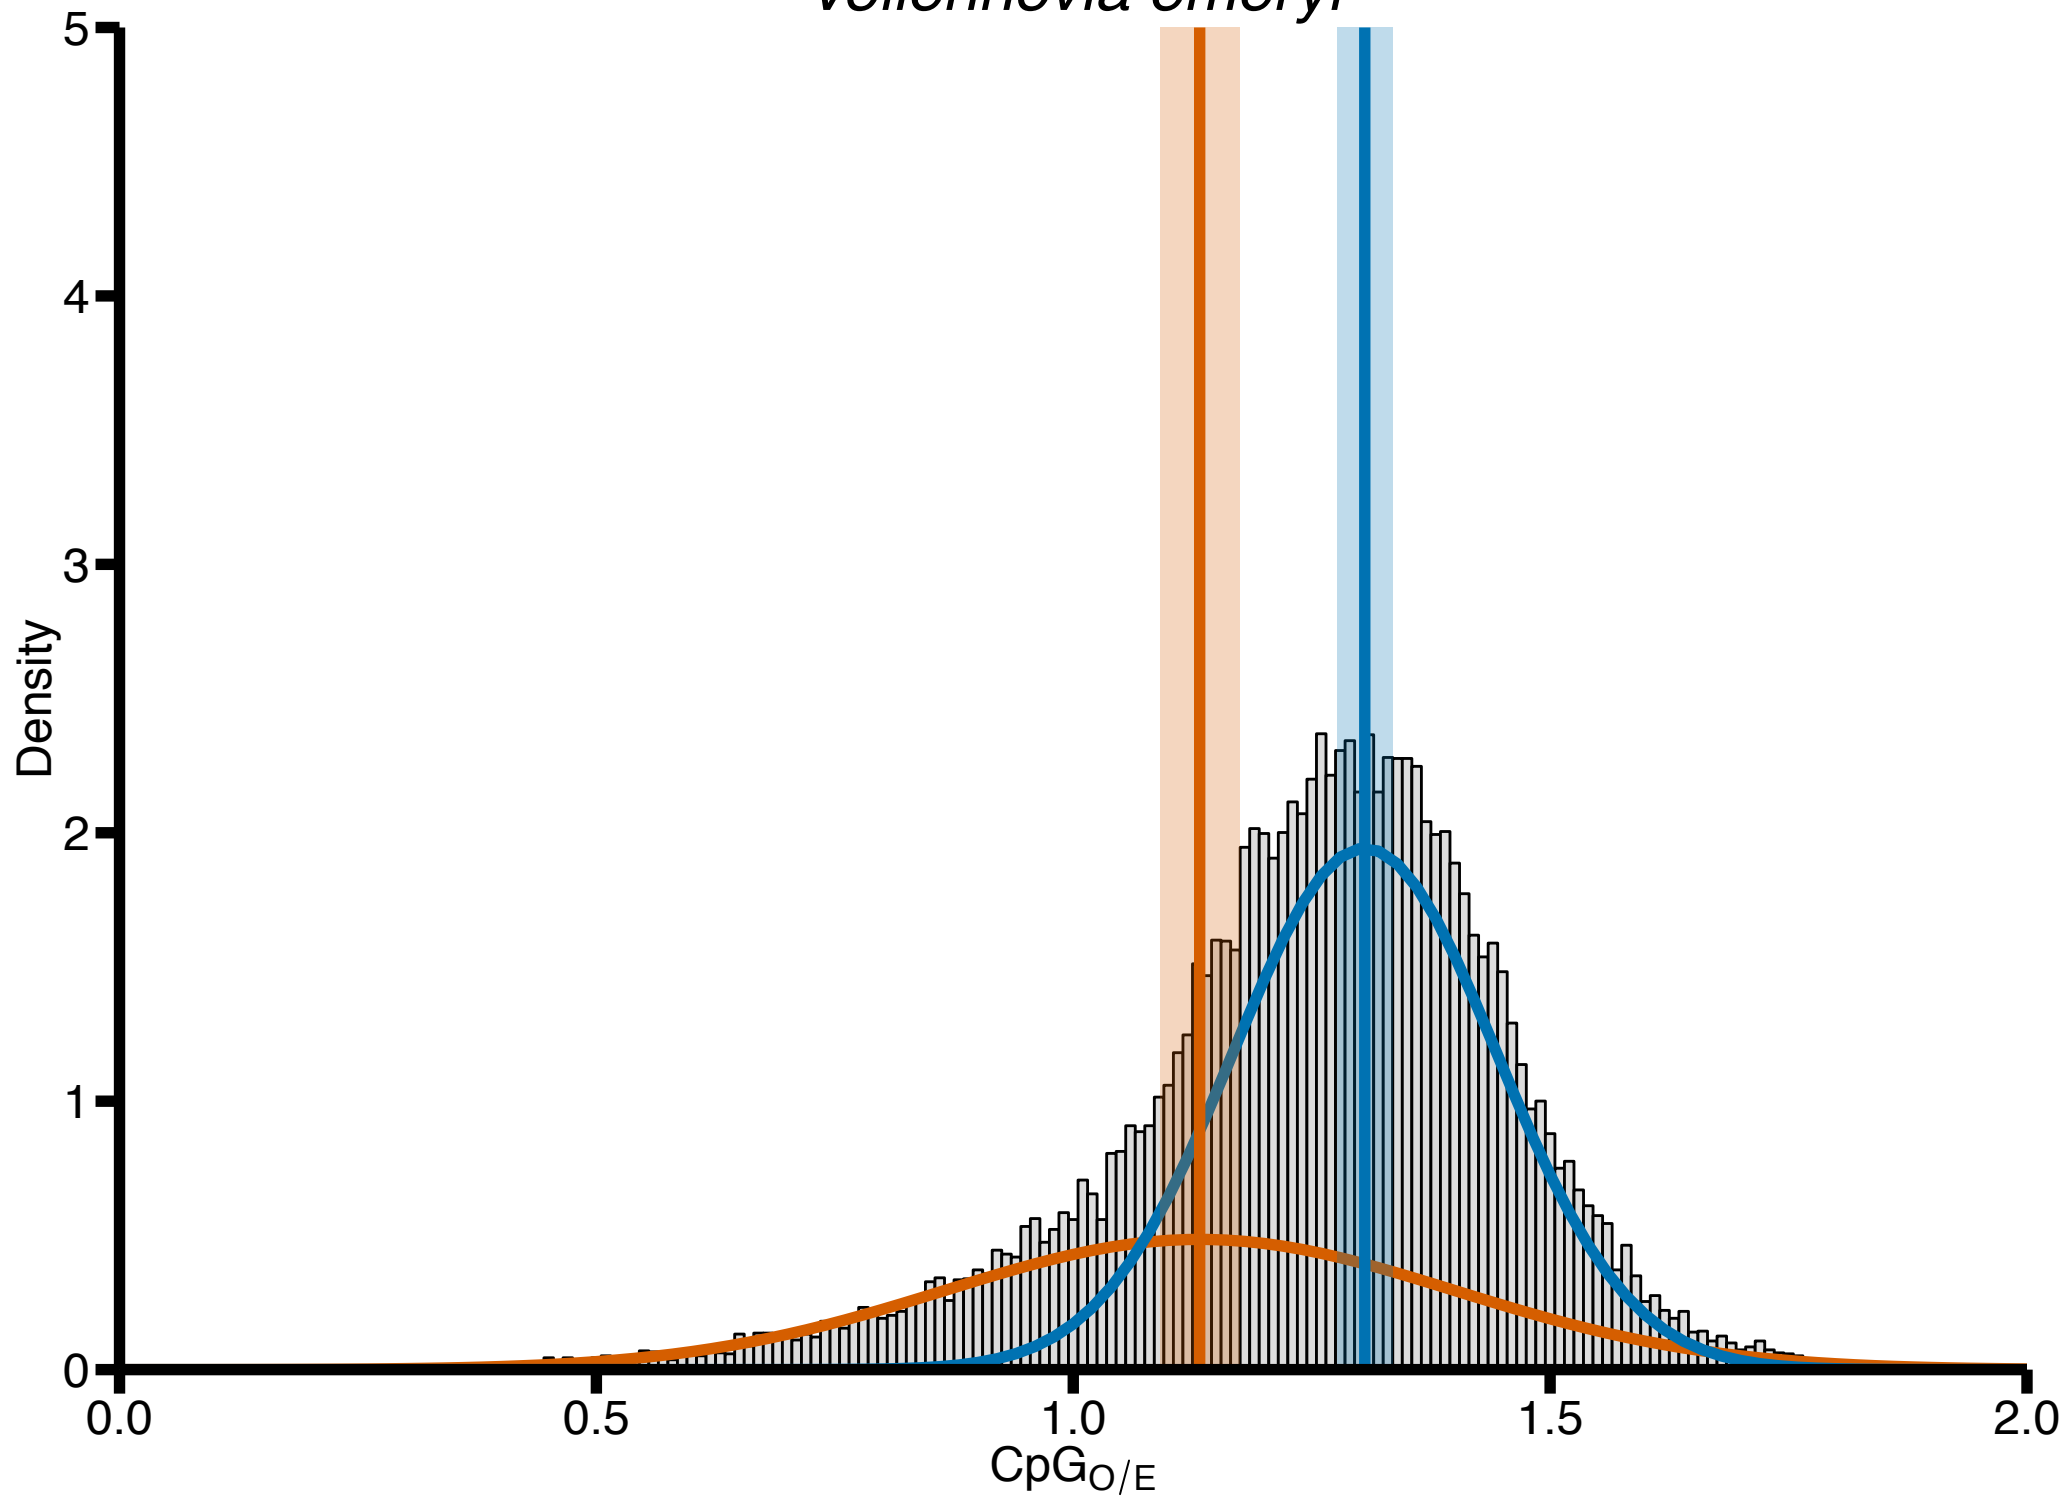

*Wasmannia auropunctata*

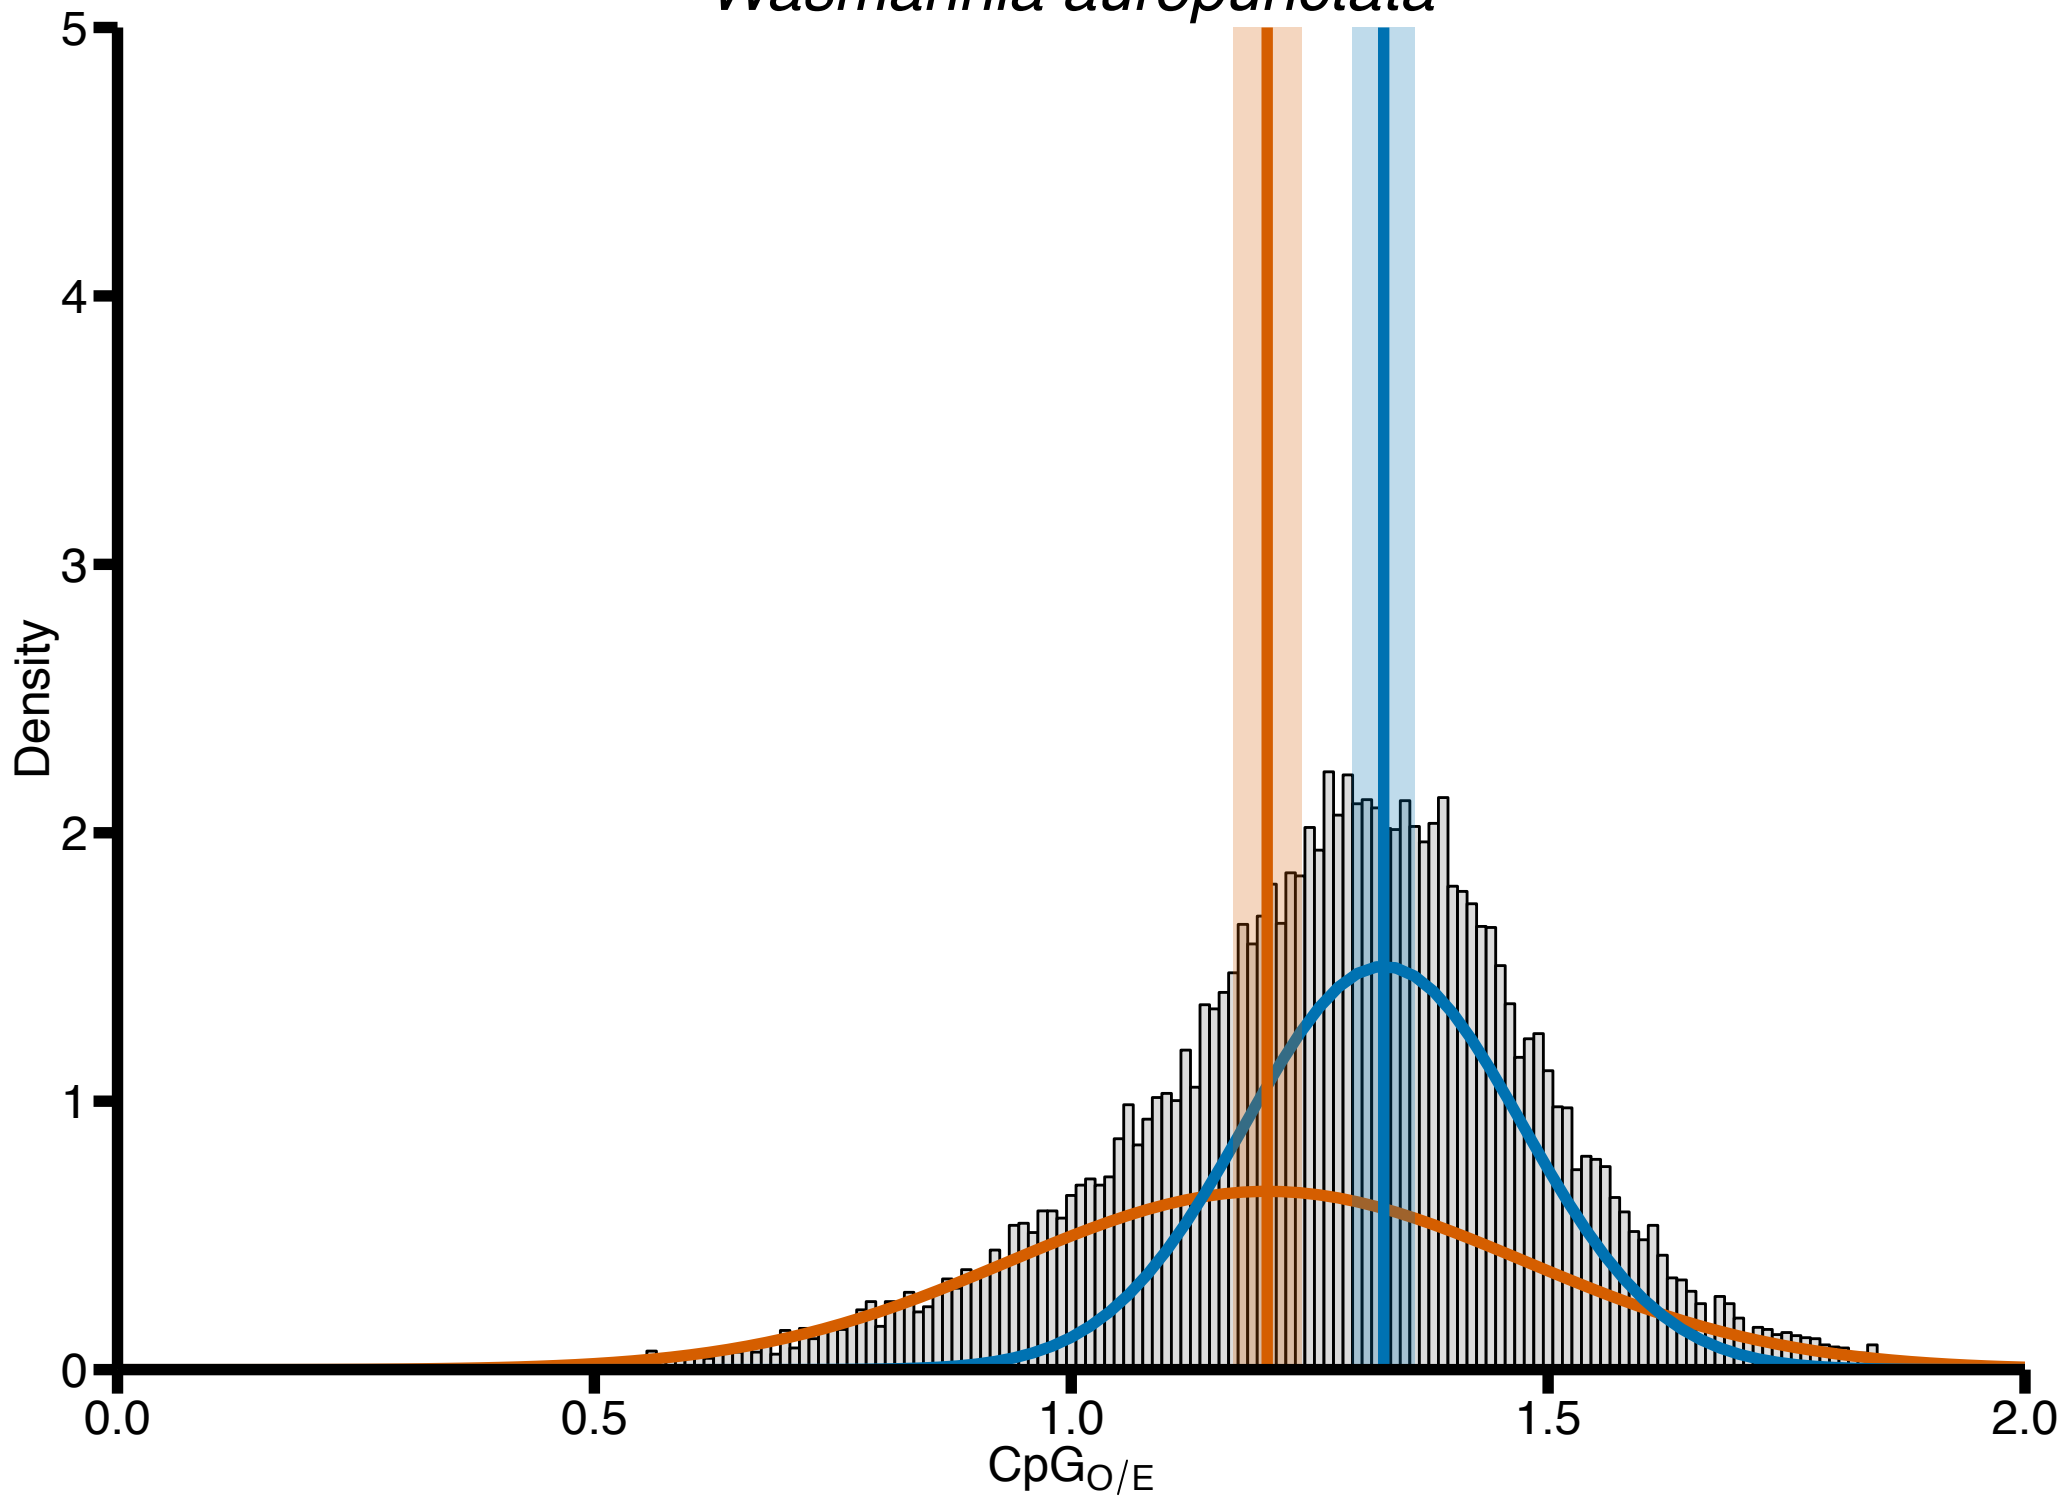

*Zootermopsis nevadensis*

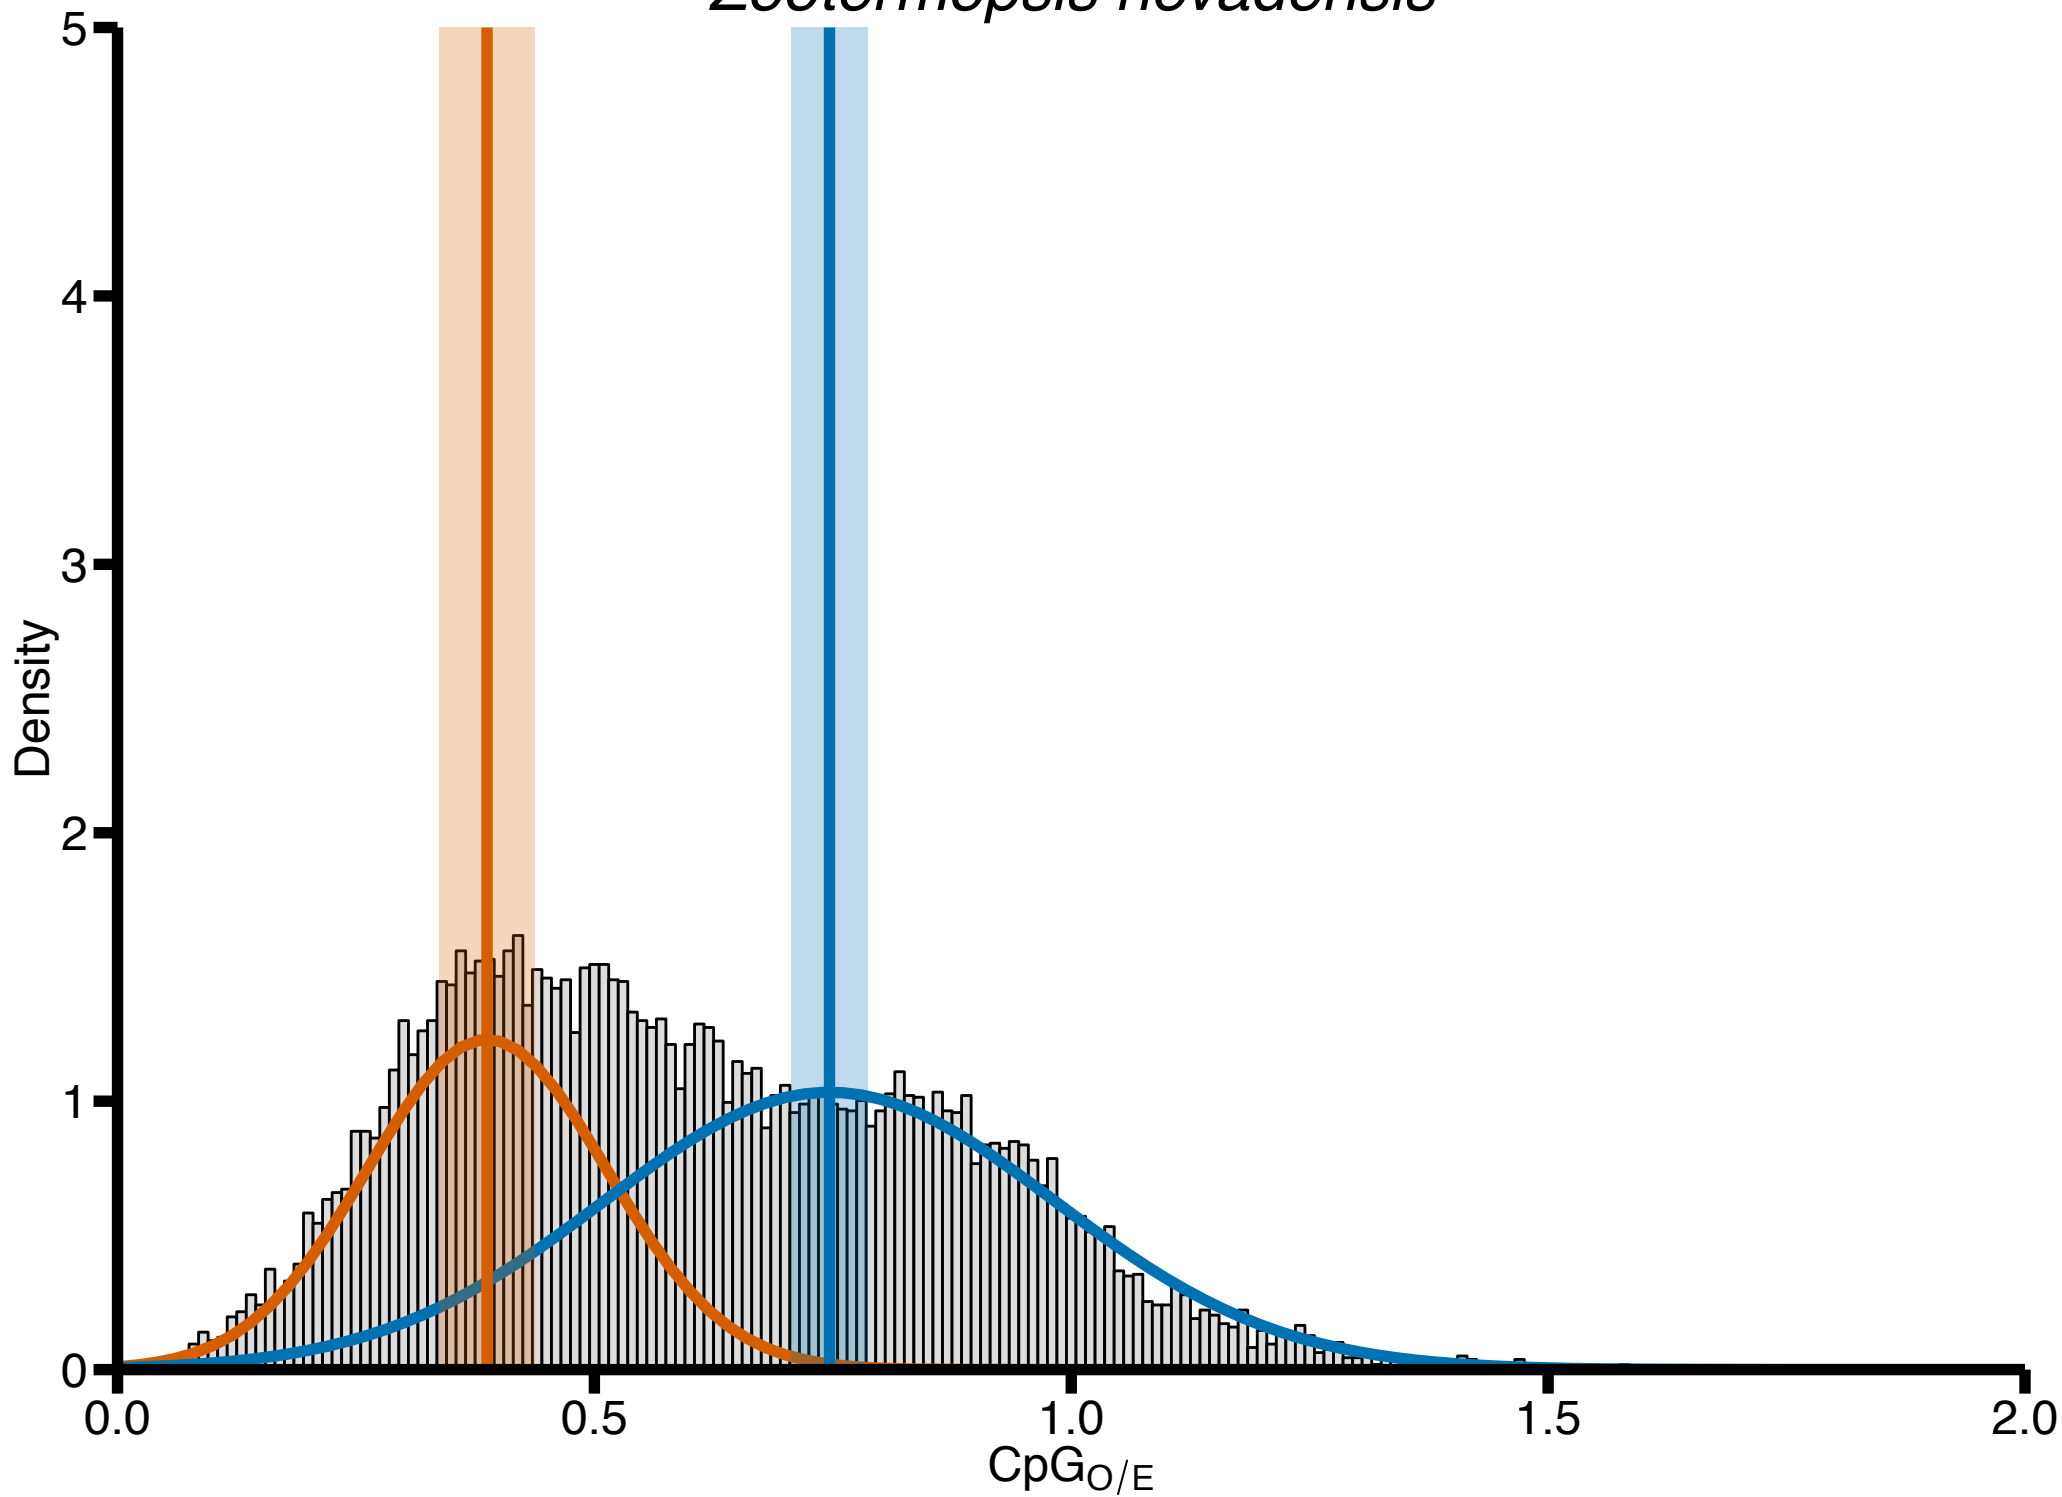

*Amyelois transitella*

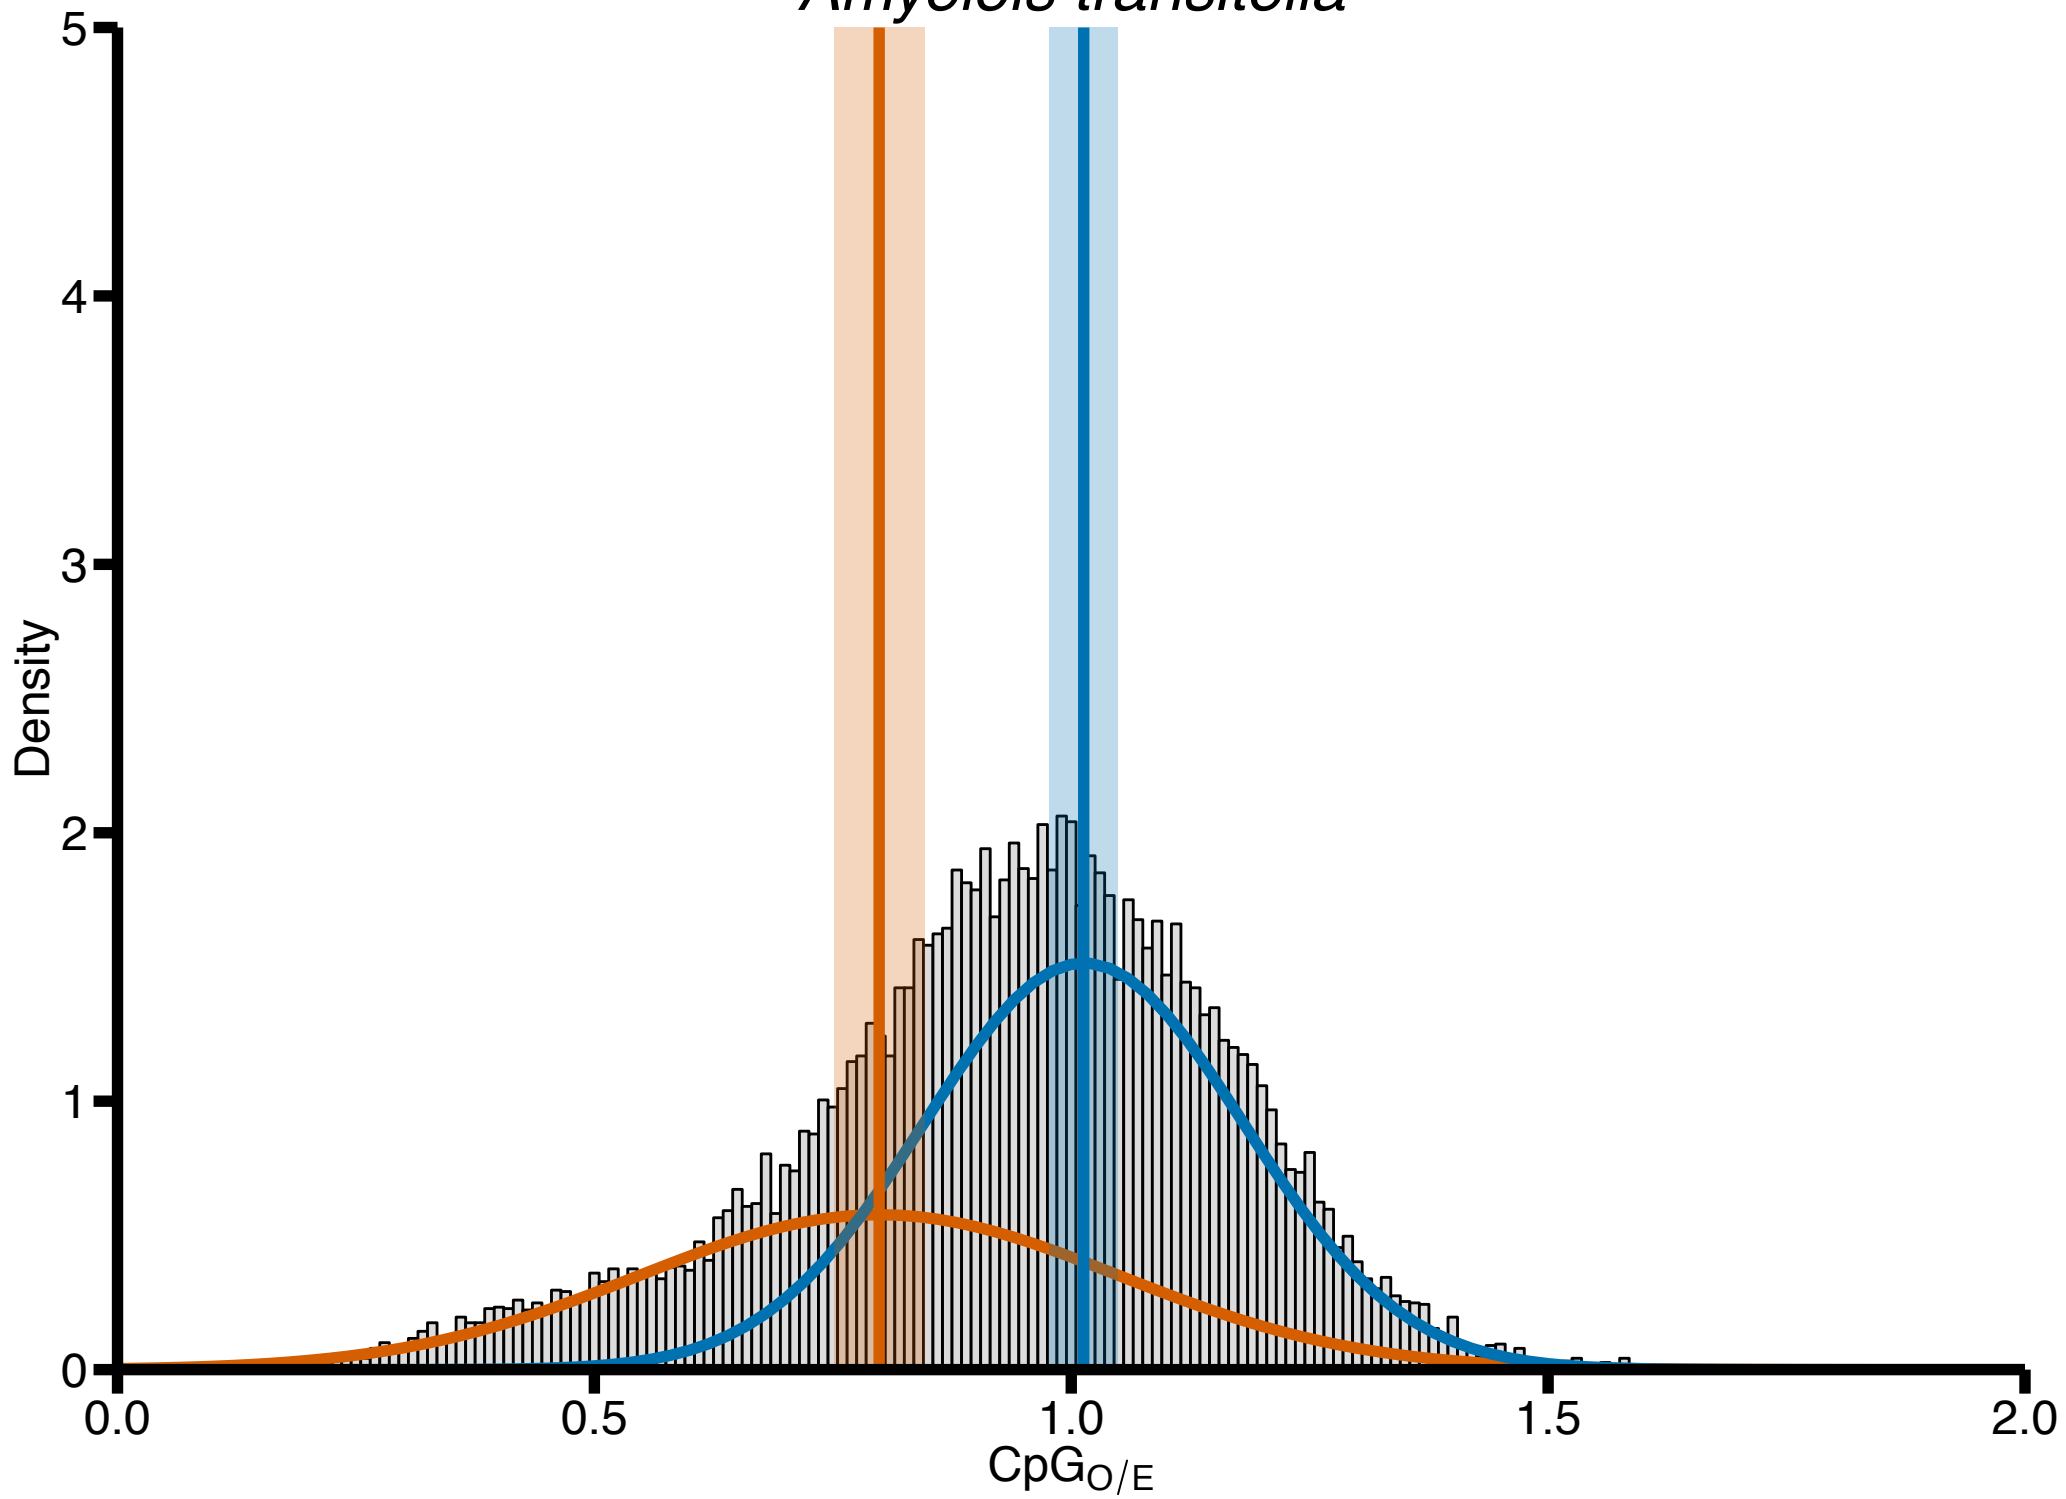

*Bombyx mori*

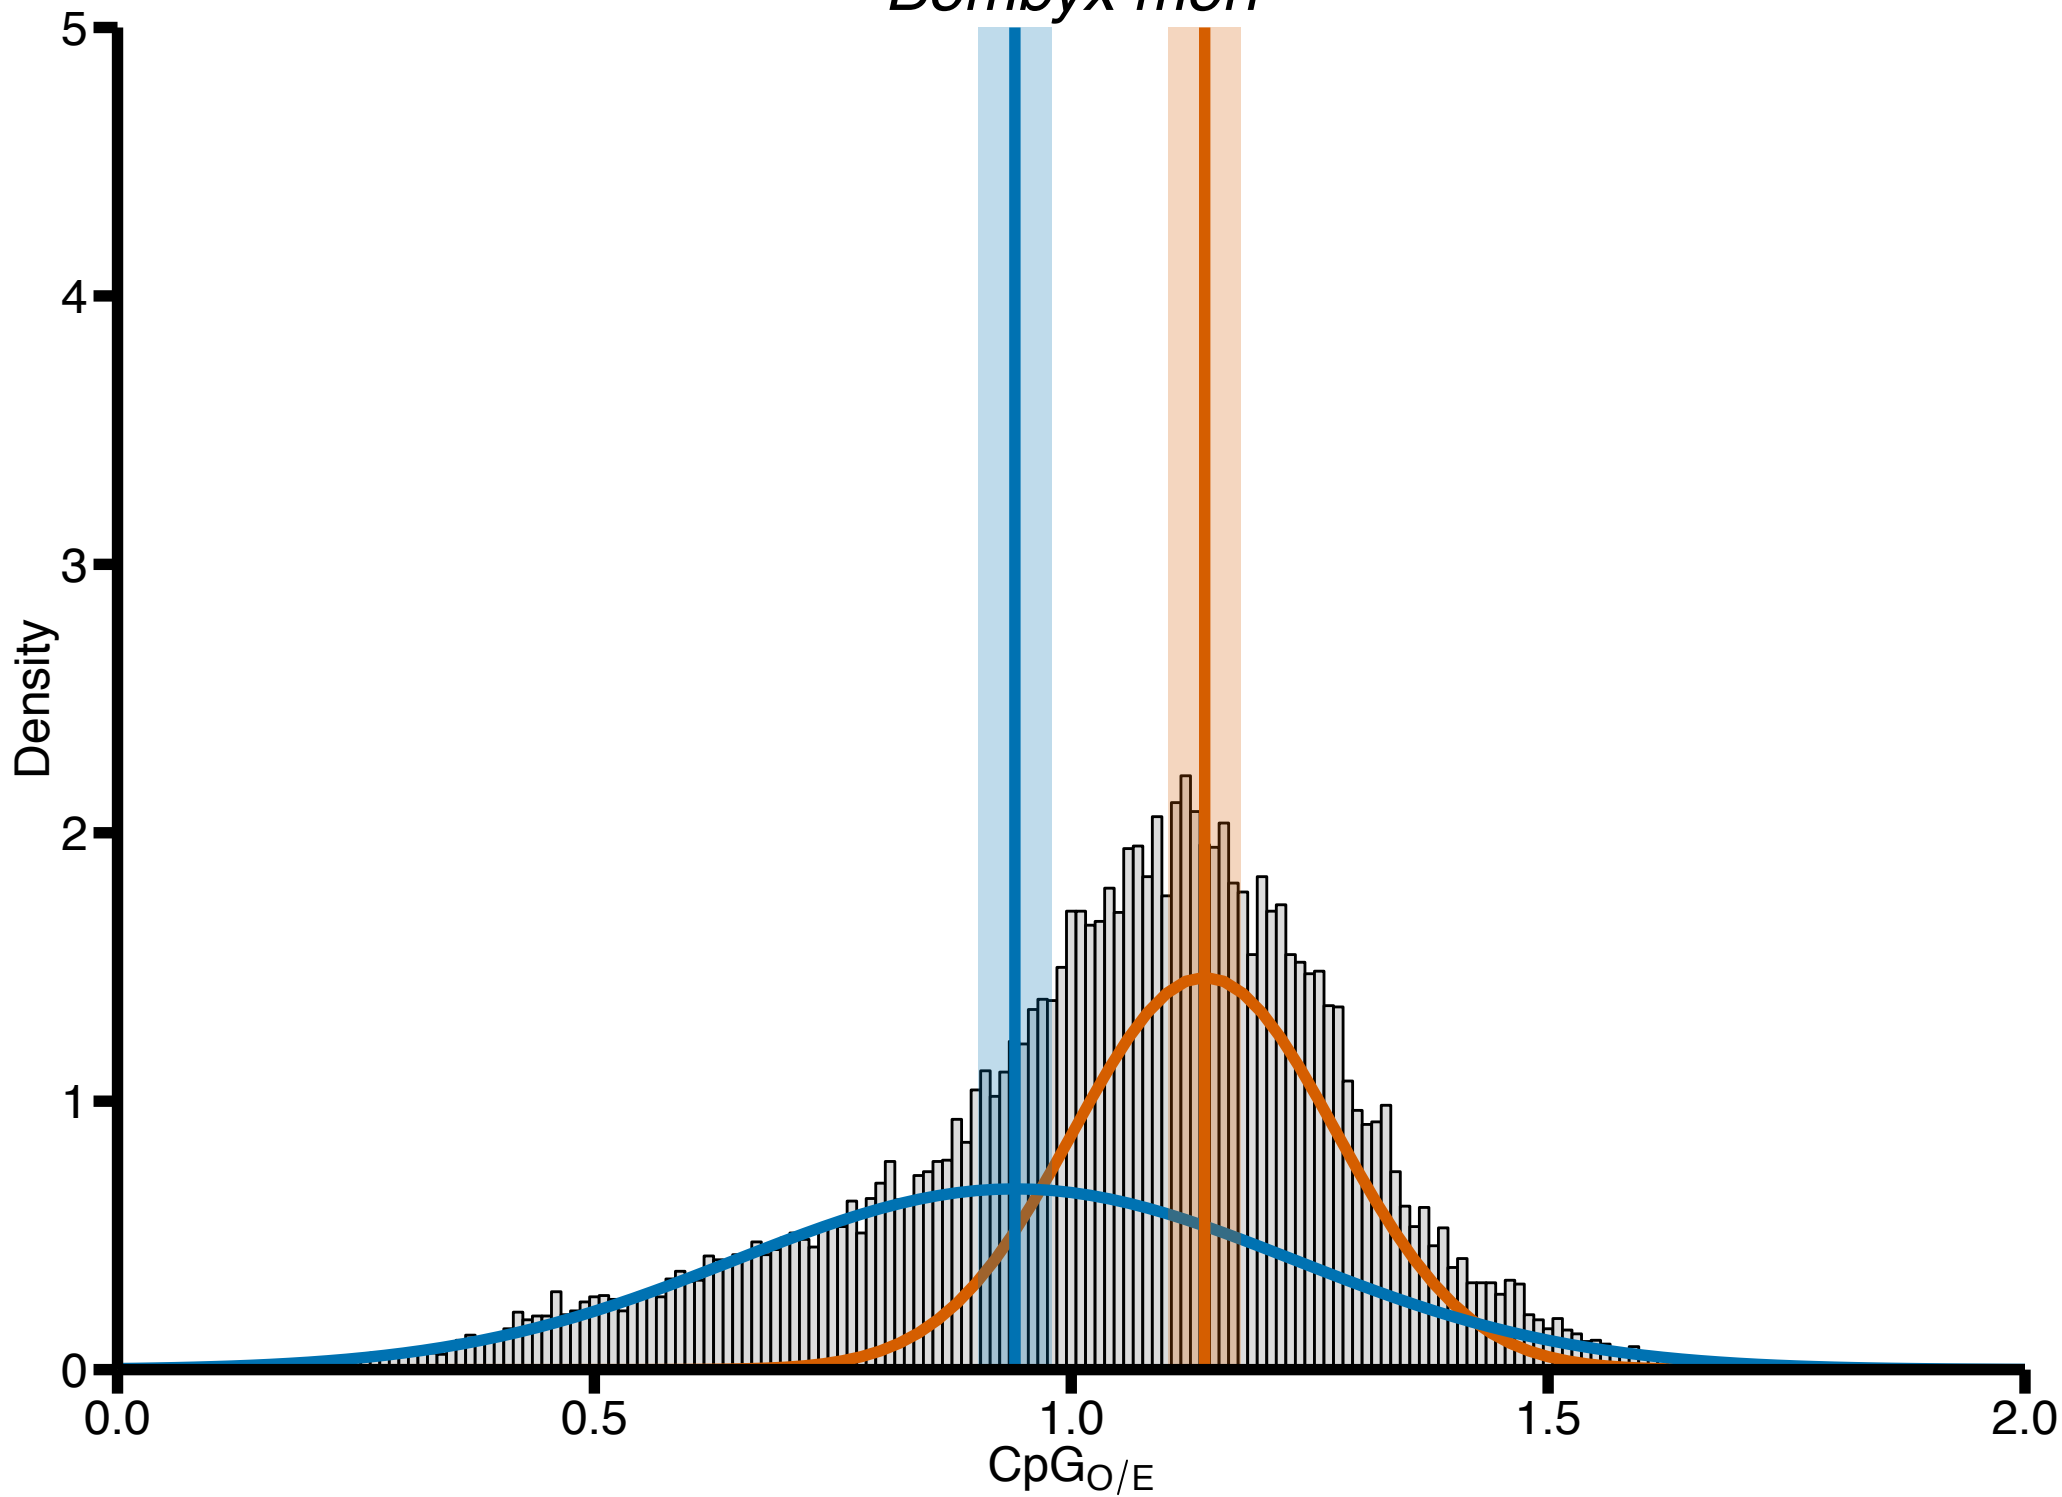

*Danaus plexippus*

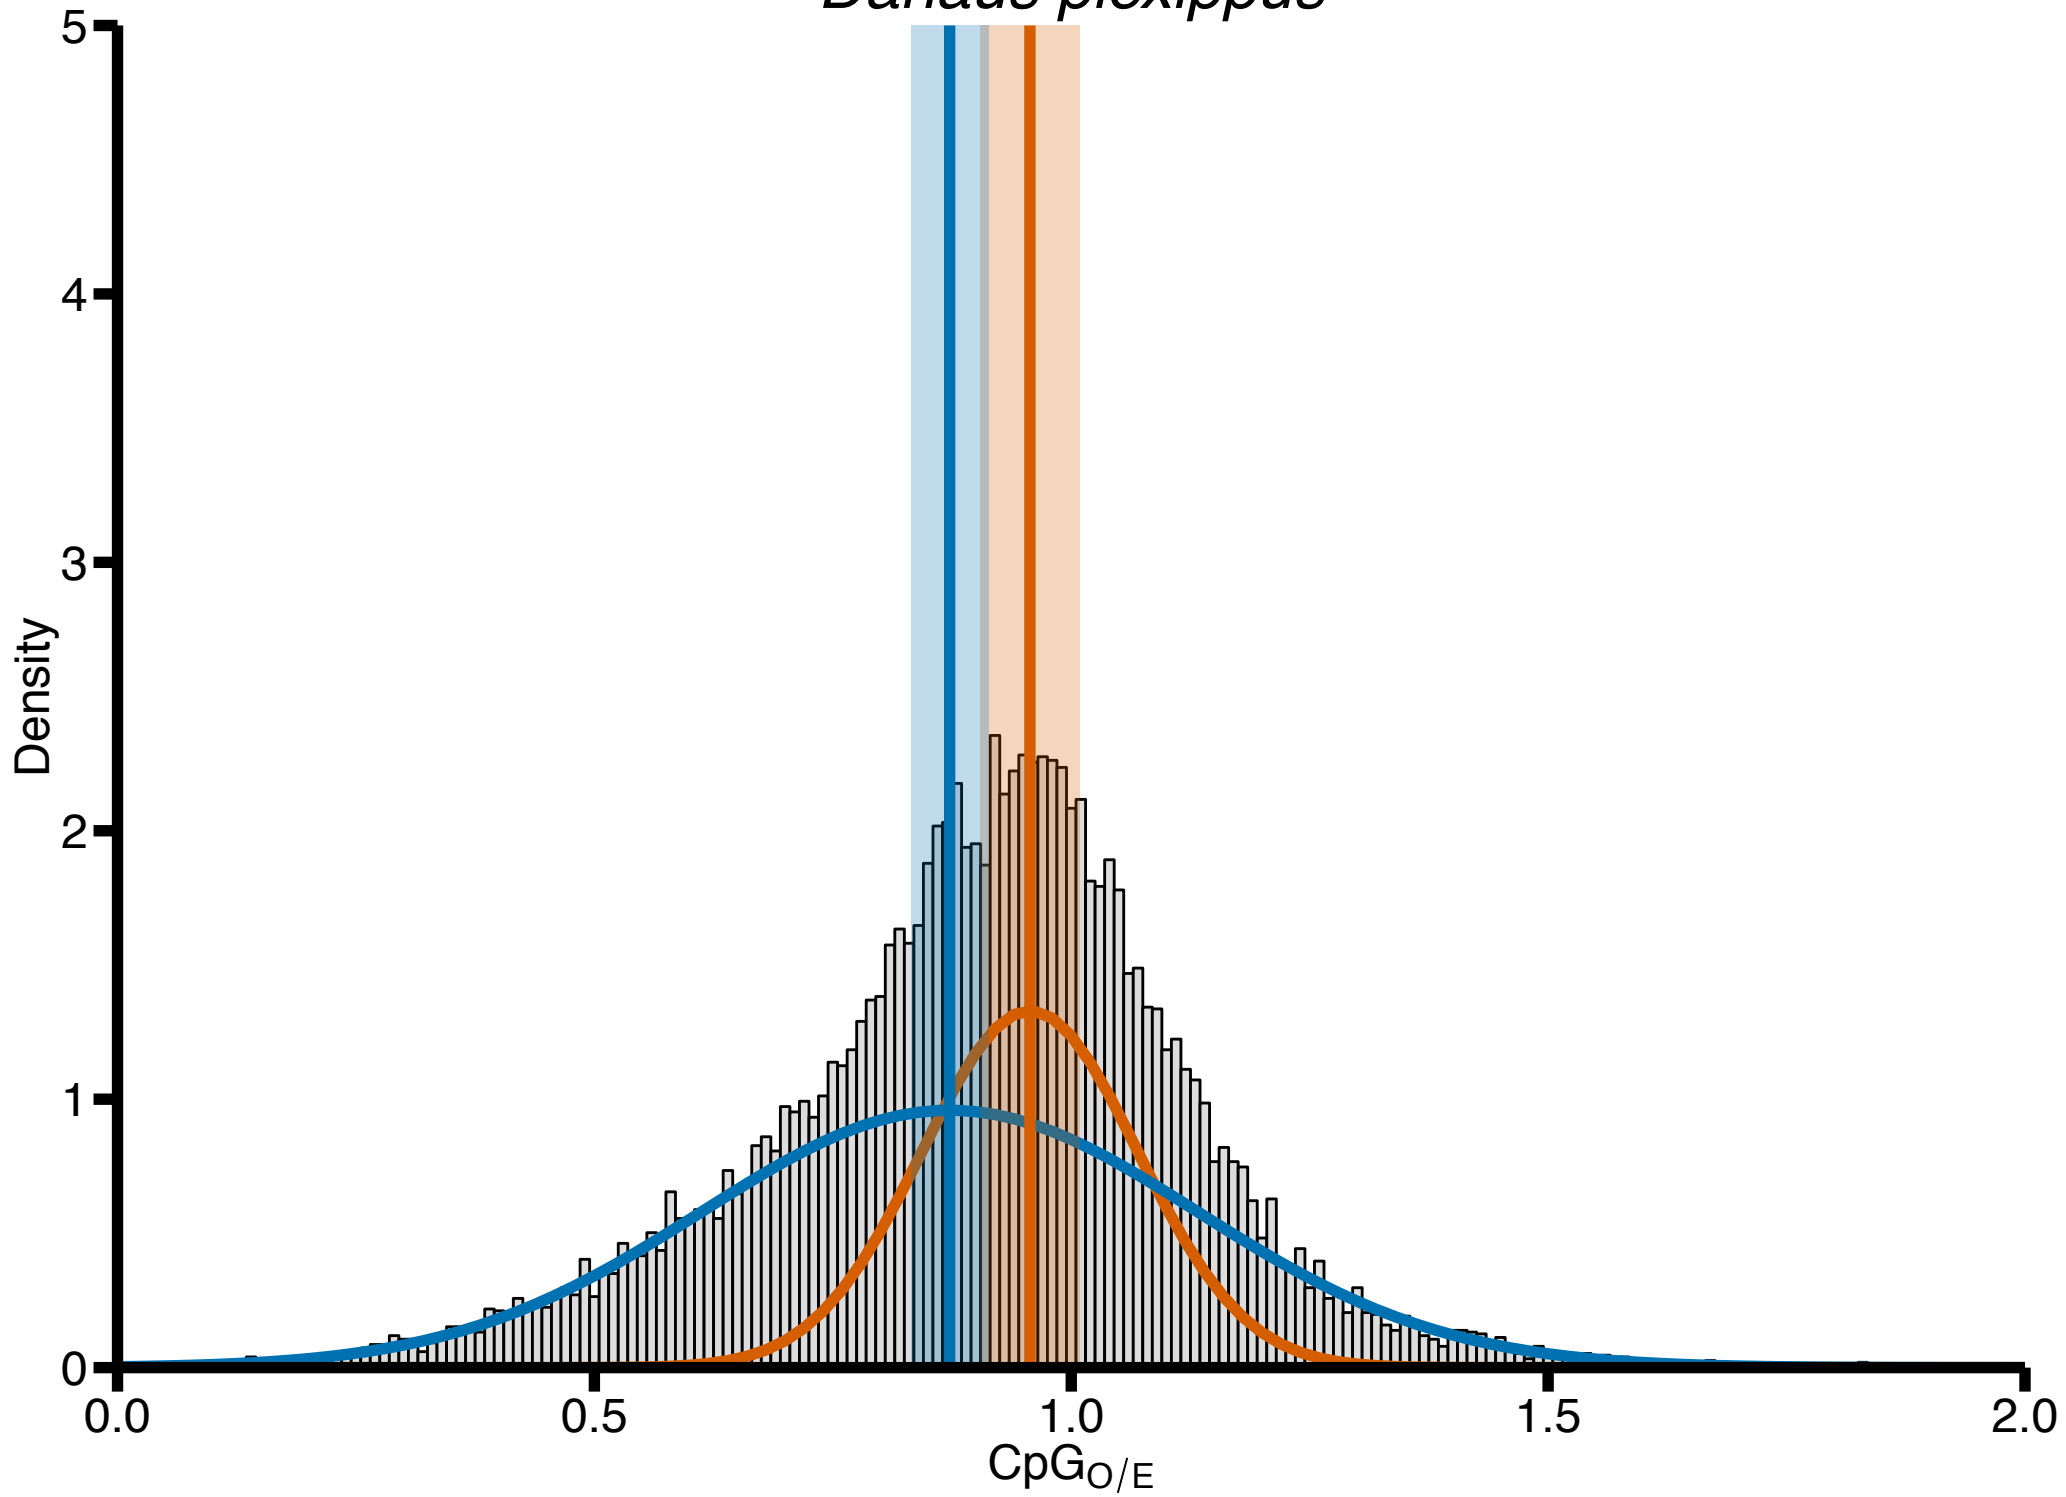



*Heliconius melpomene*

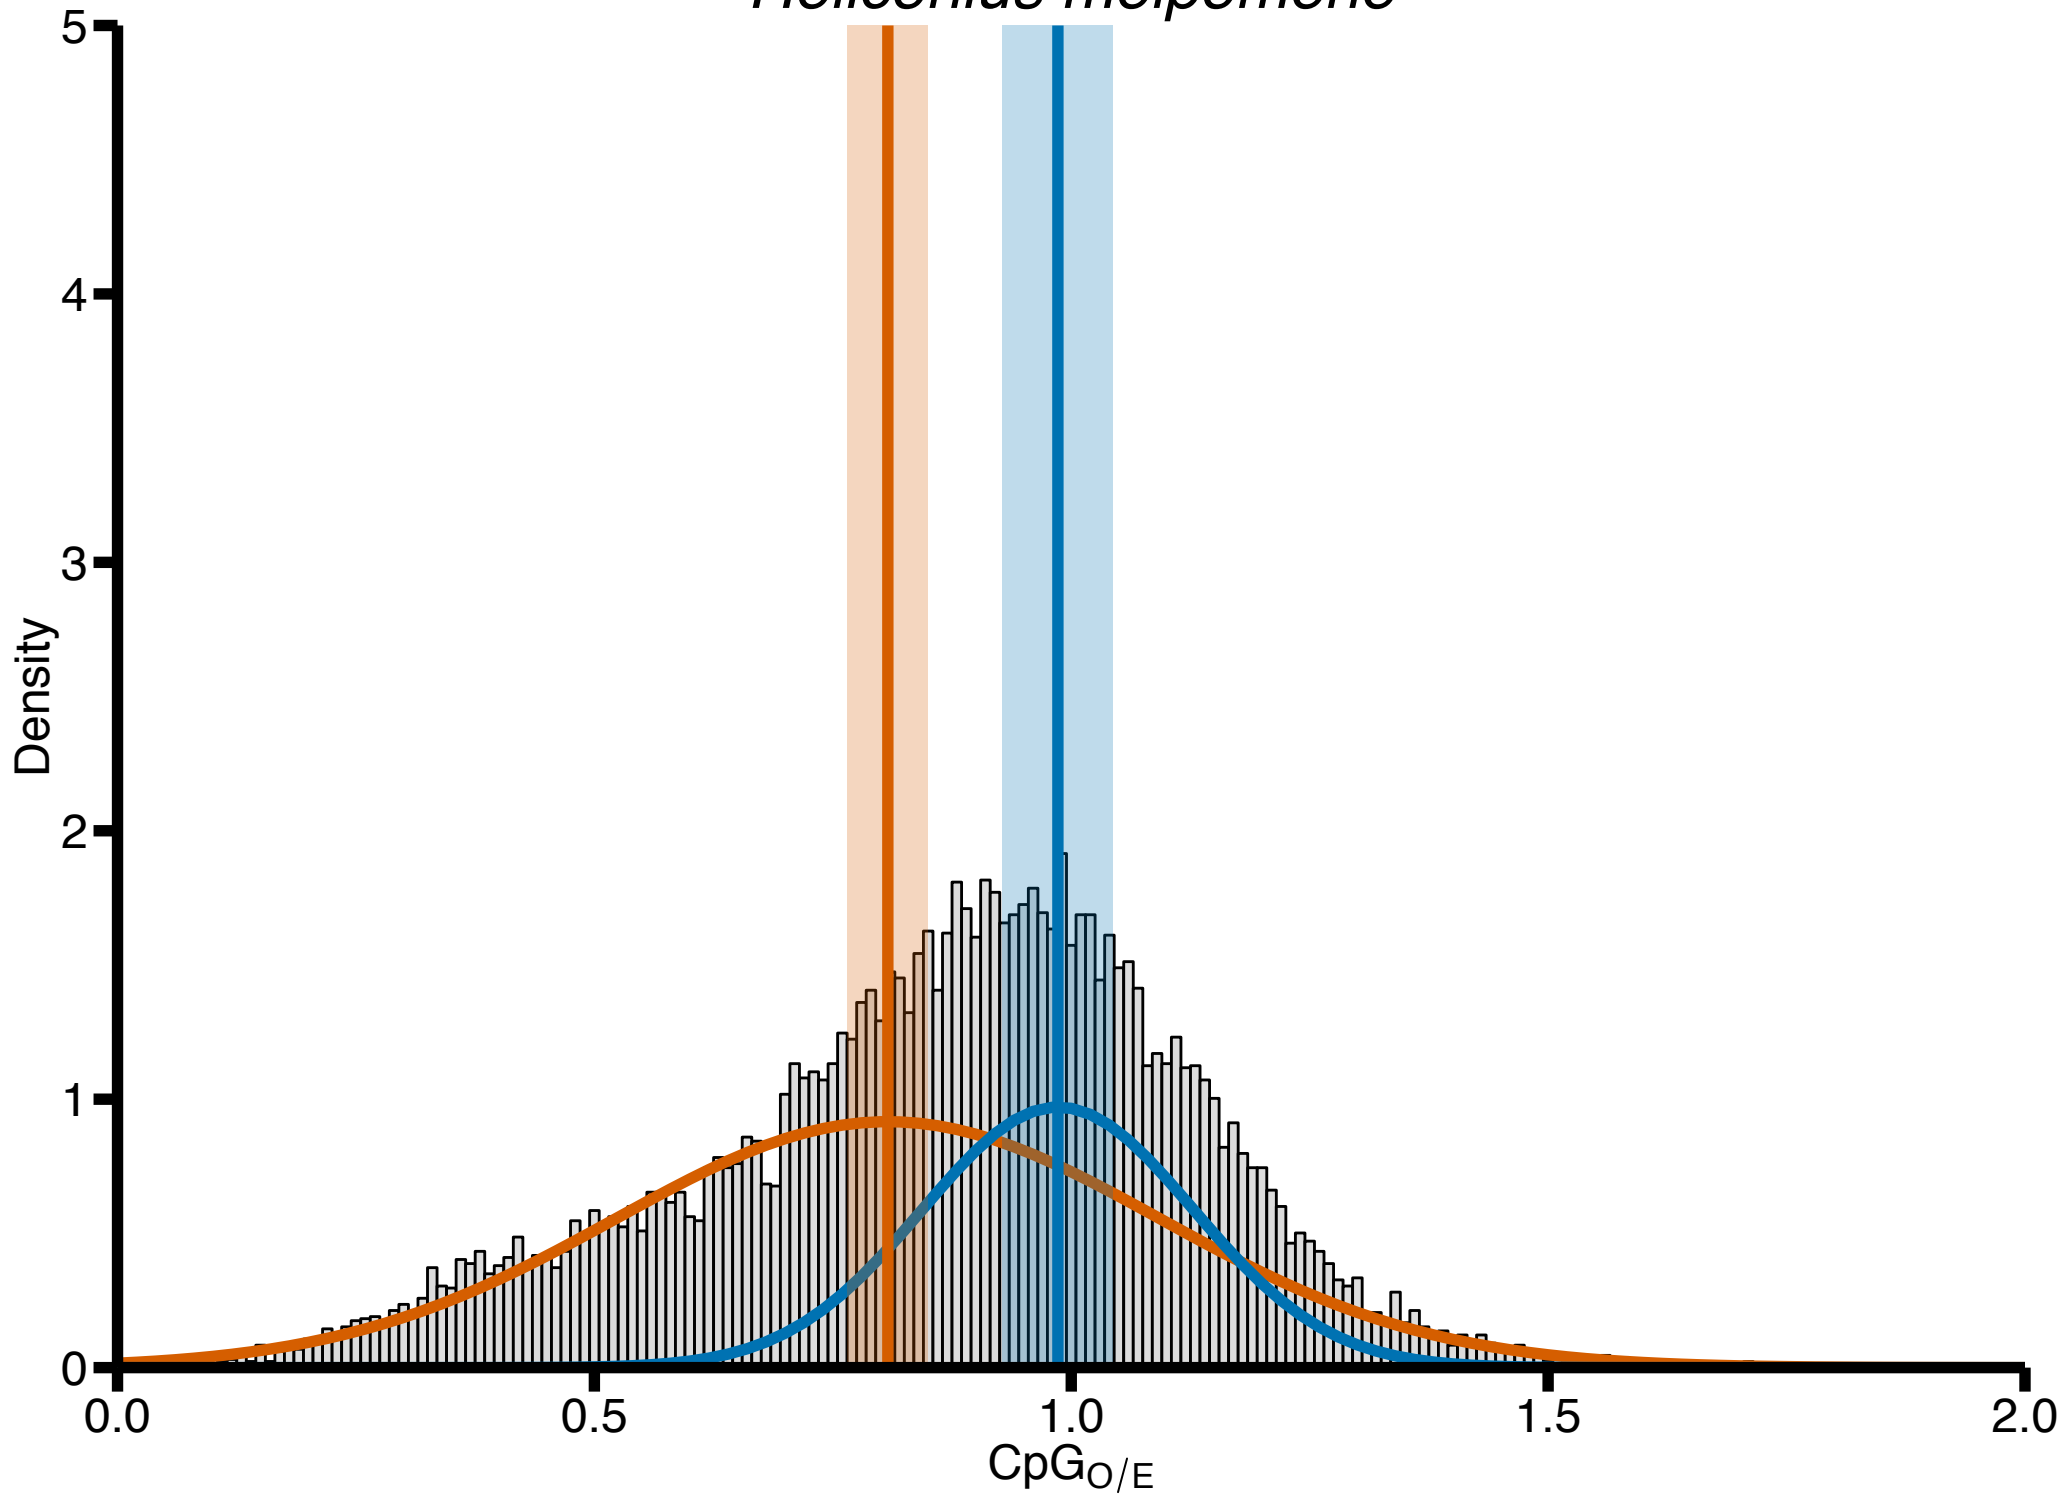

*Melitaea cinxia*

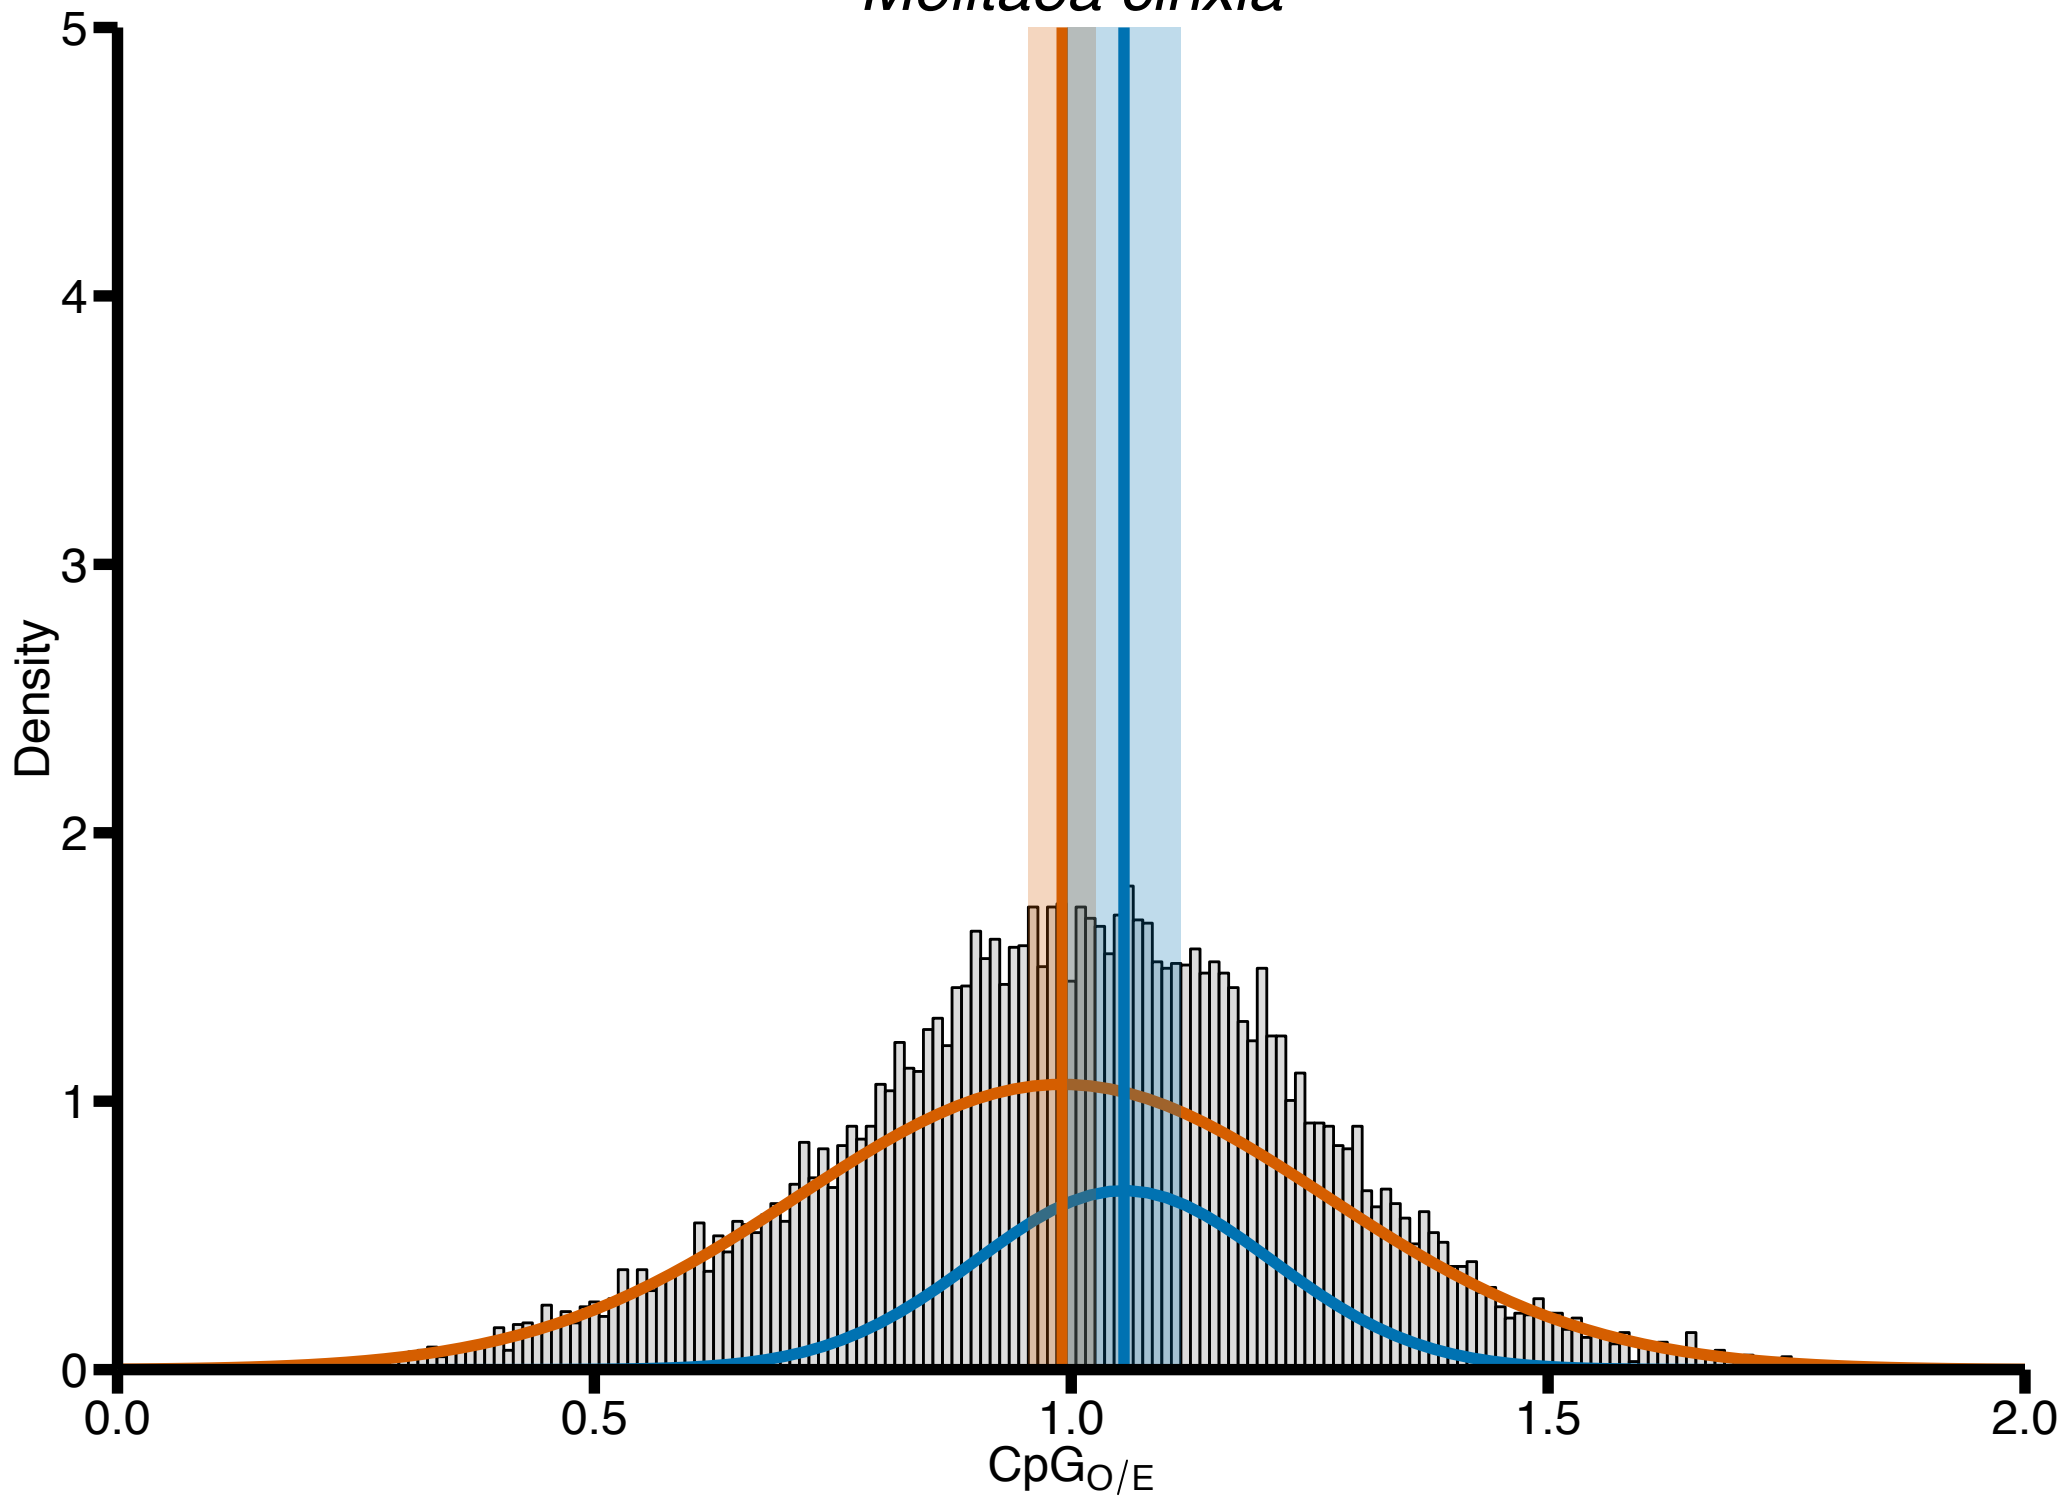

*Operophtera brumata*

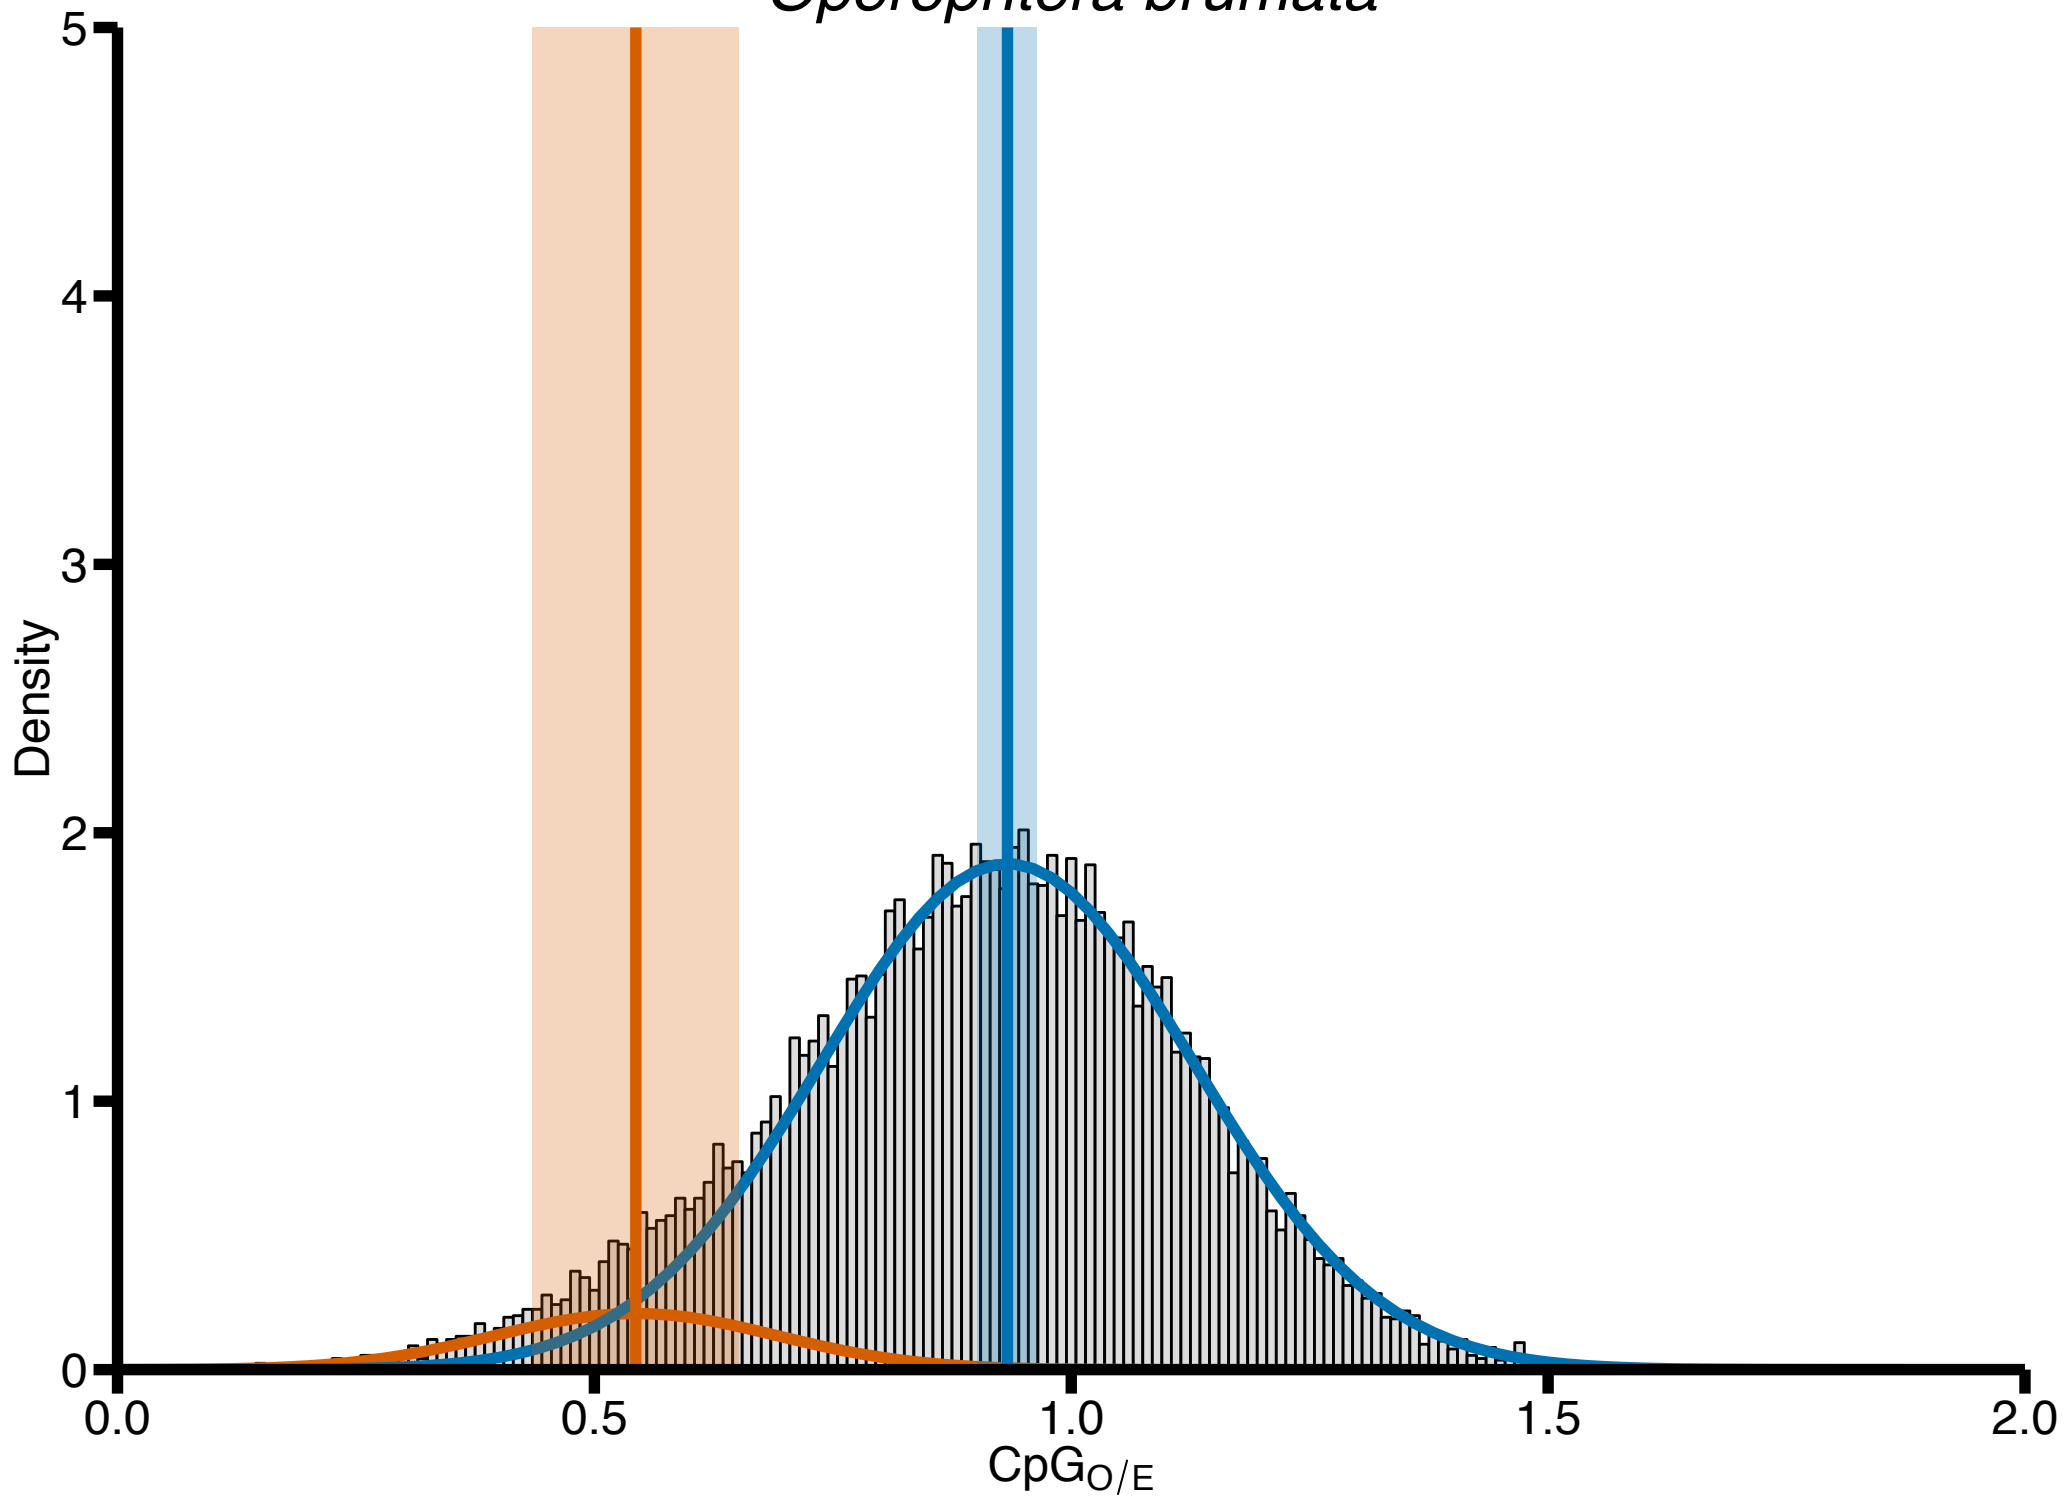

*Papilio machaon*

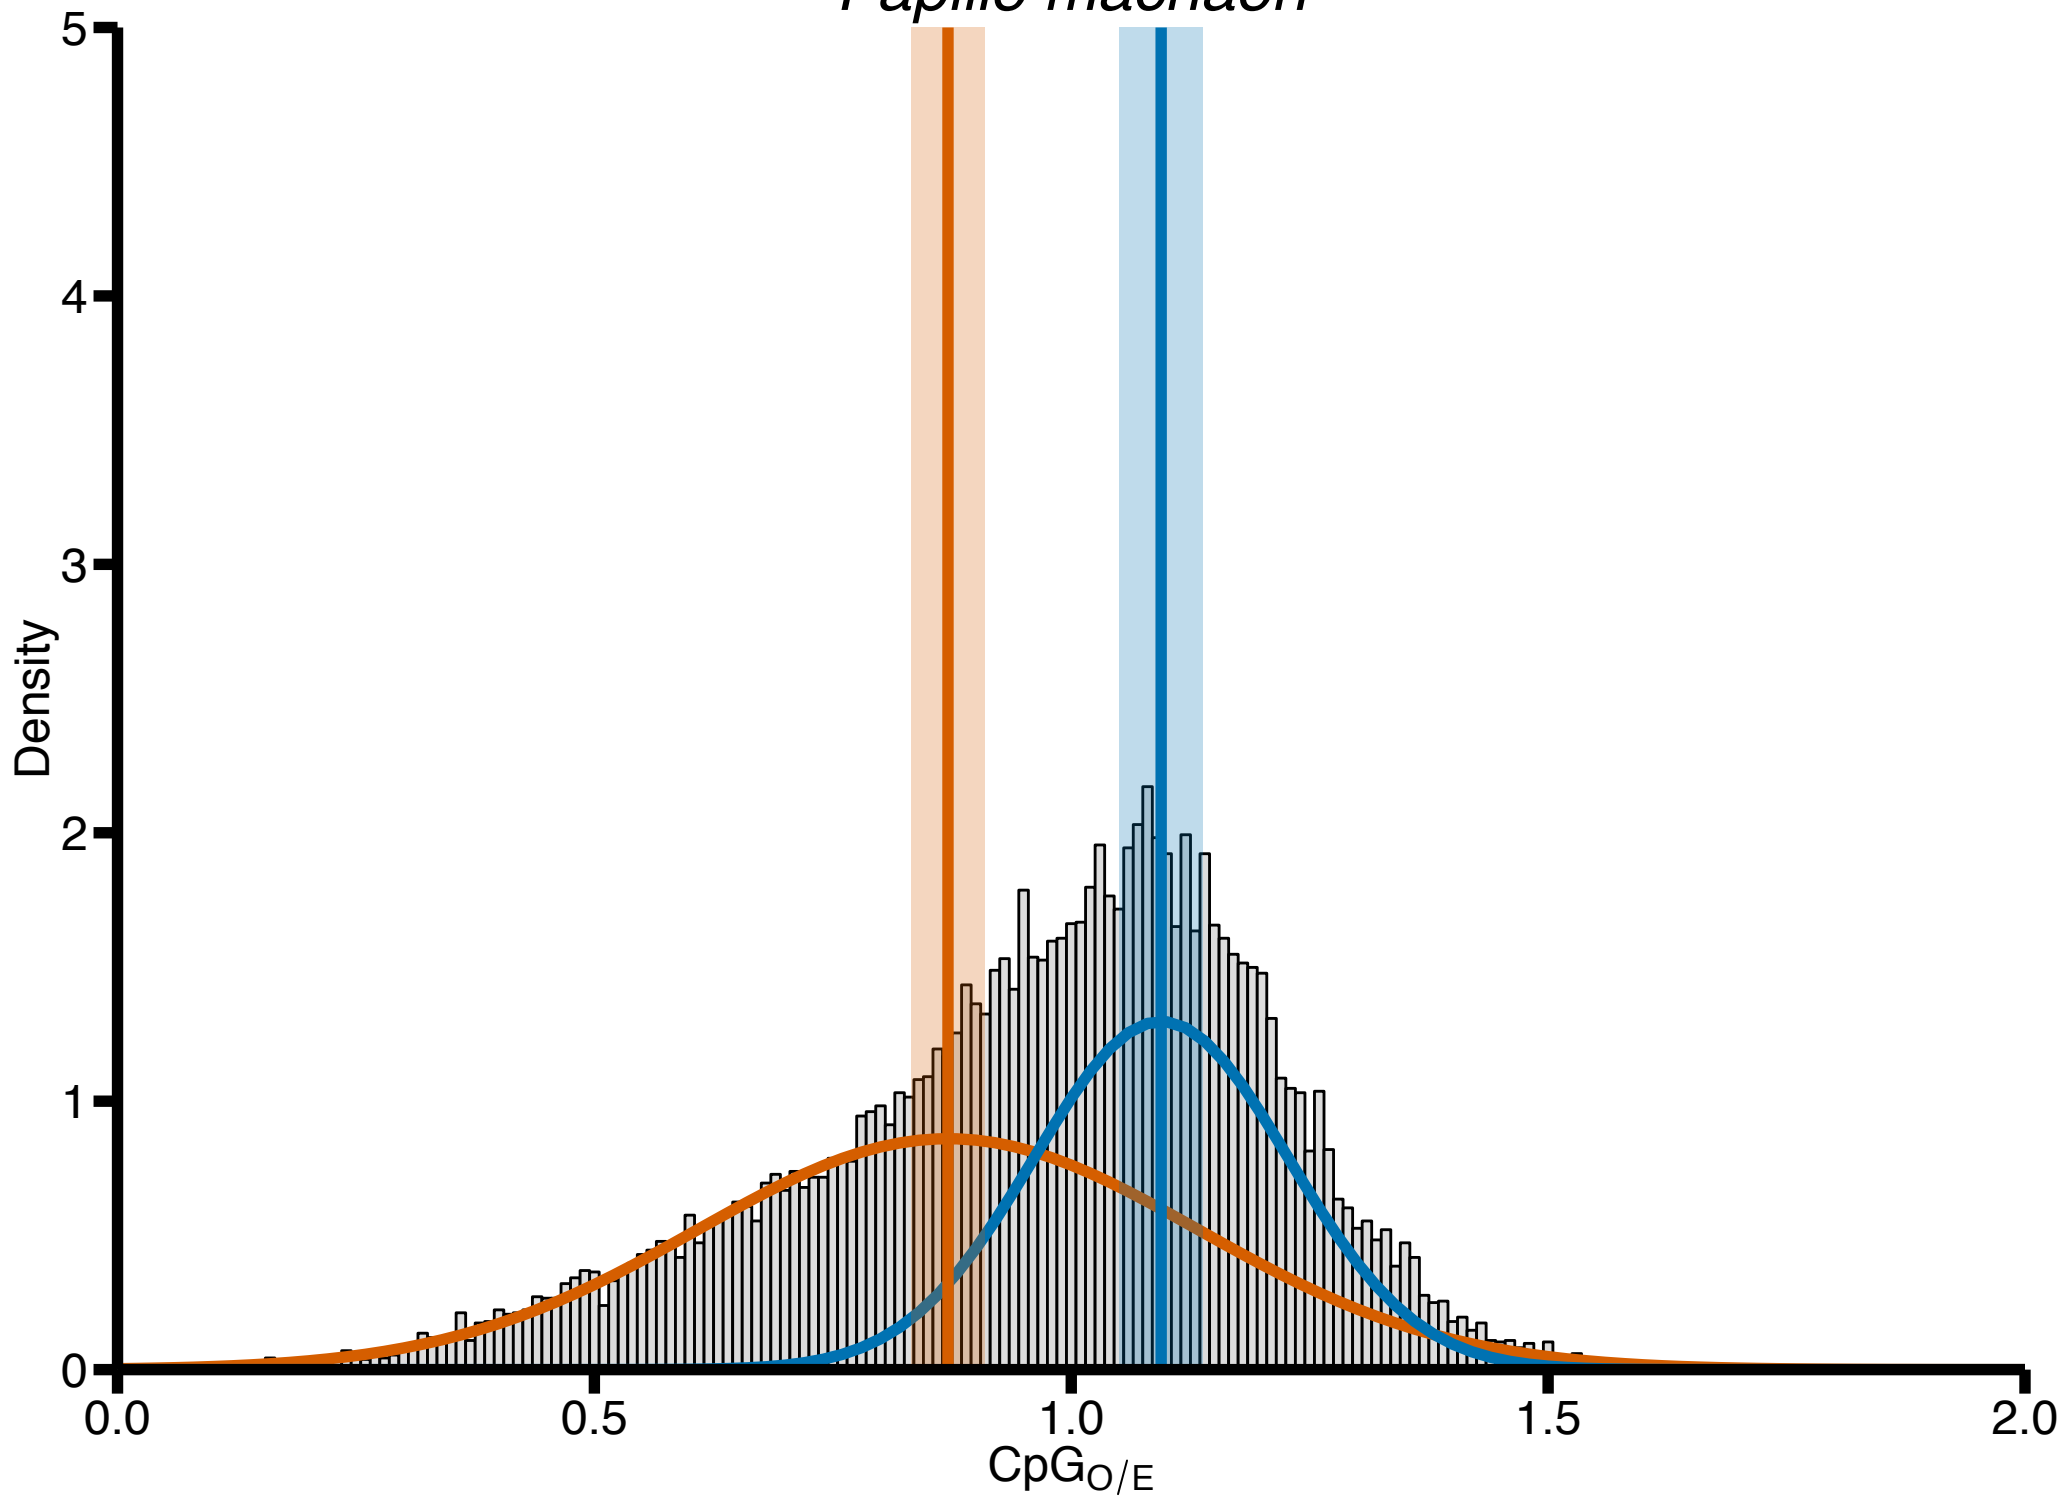

*Papilio polytes*

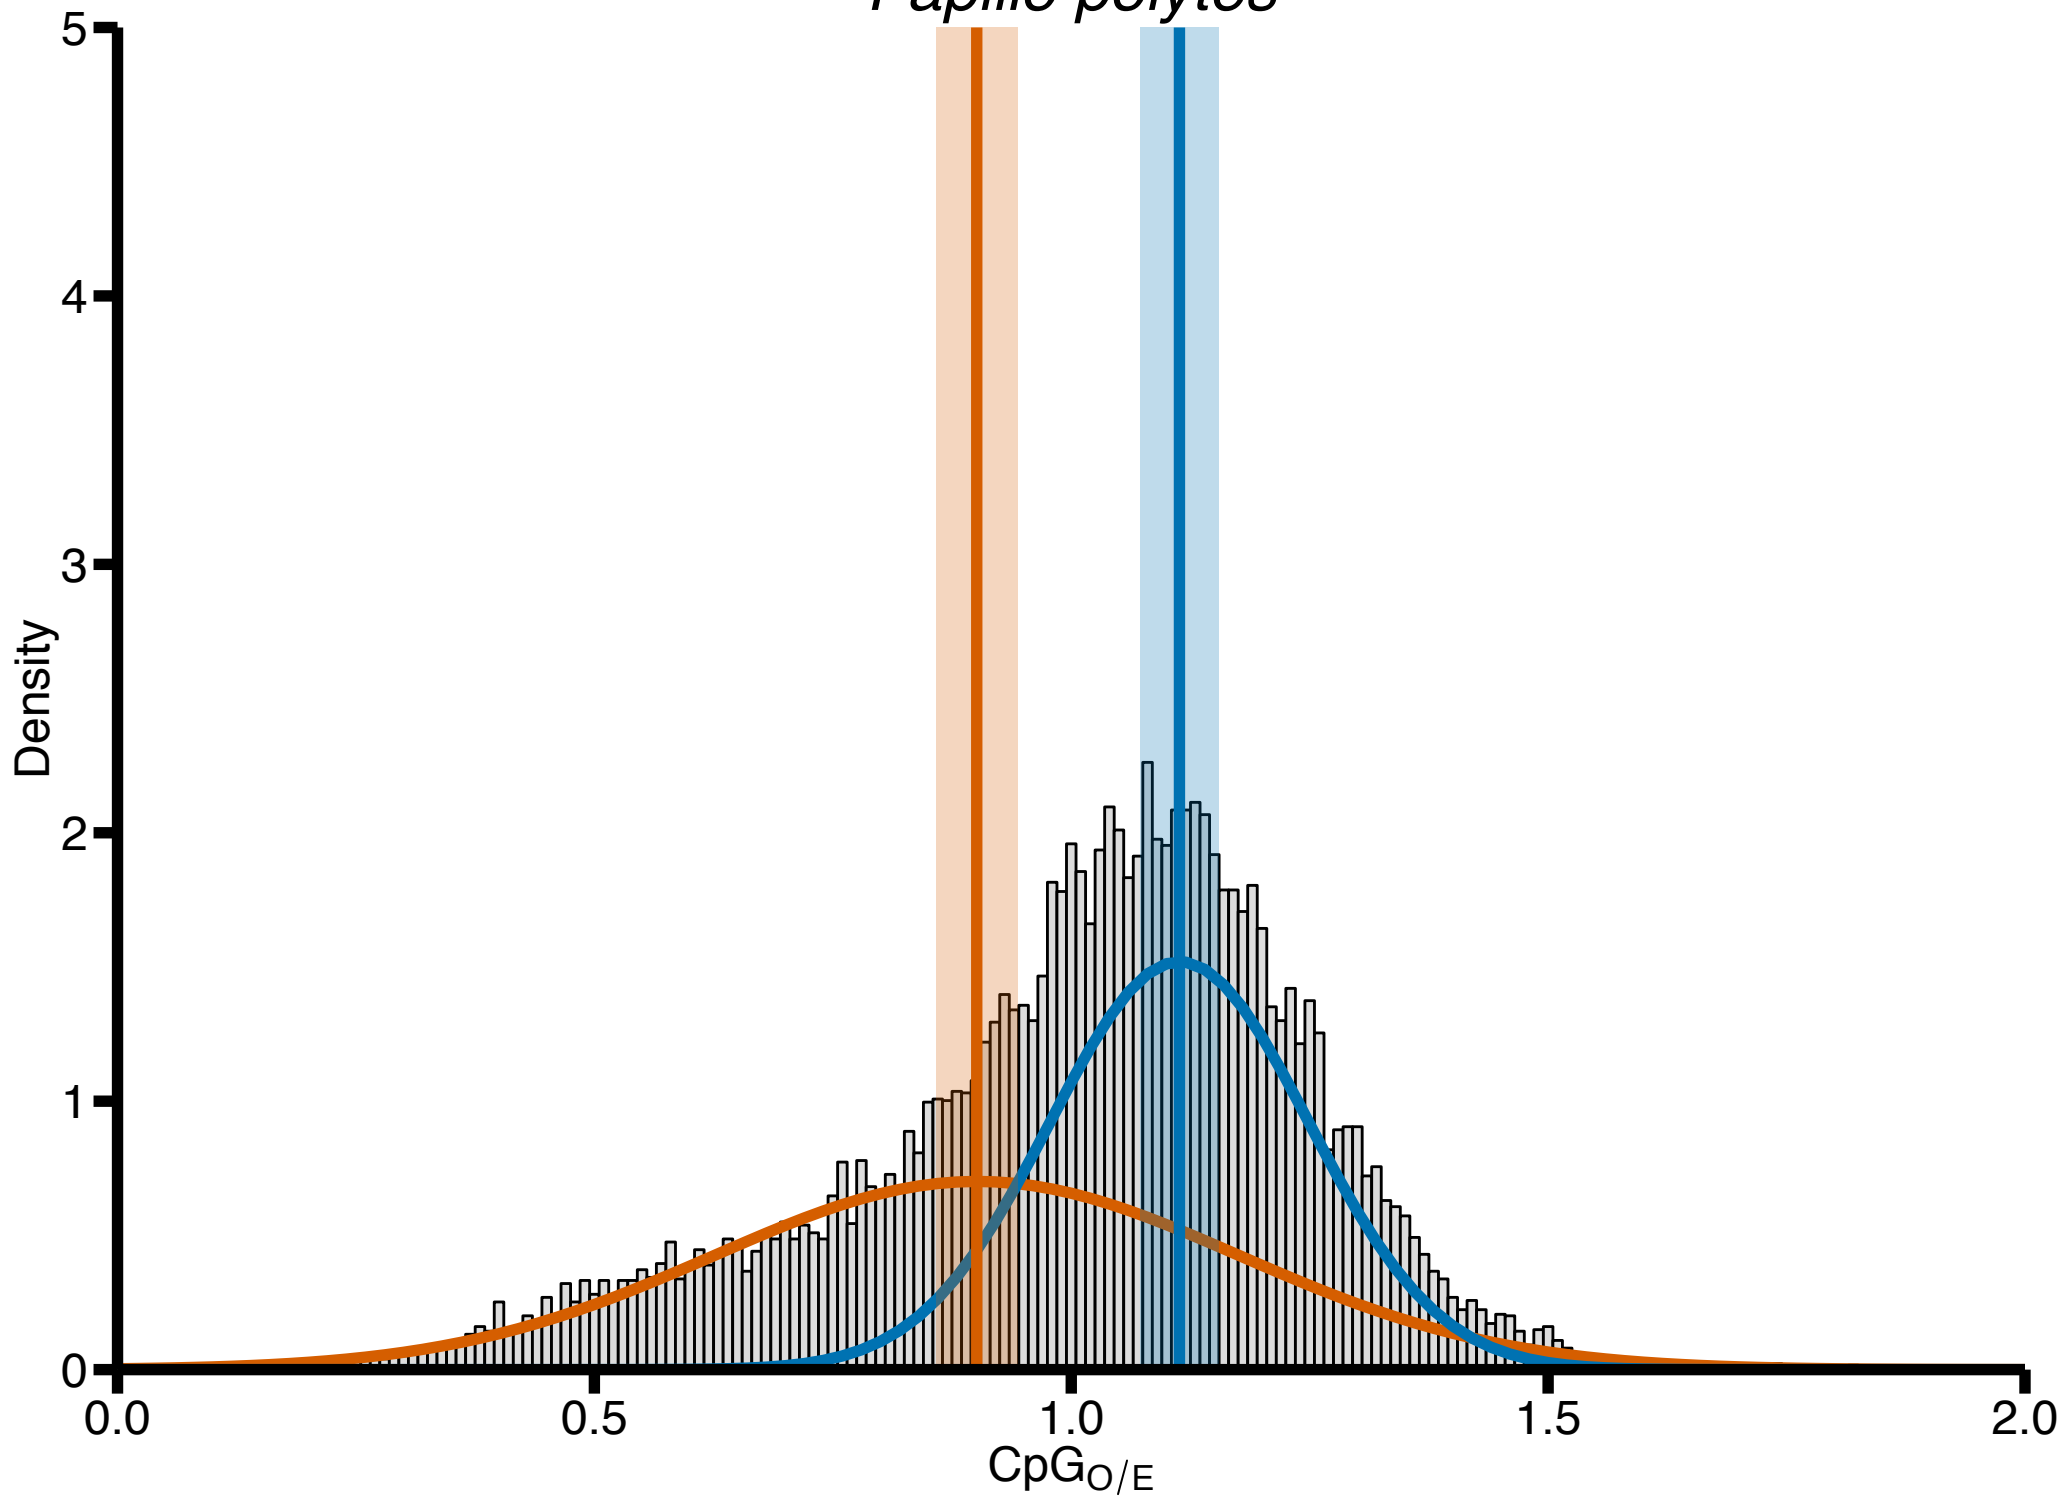

*Papilio xuthus*

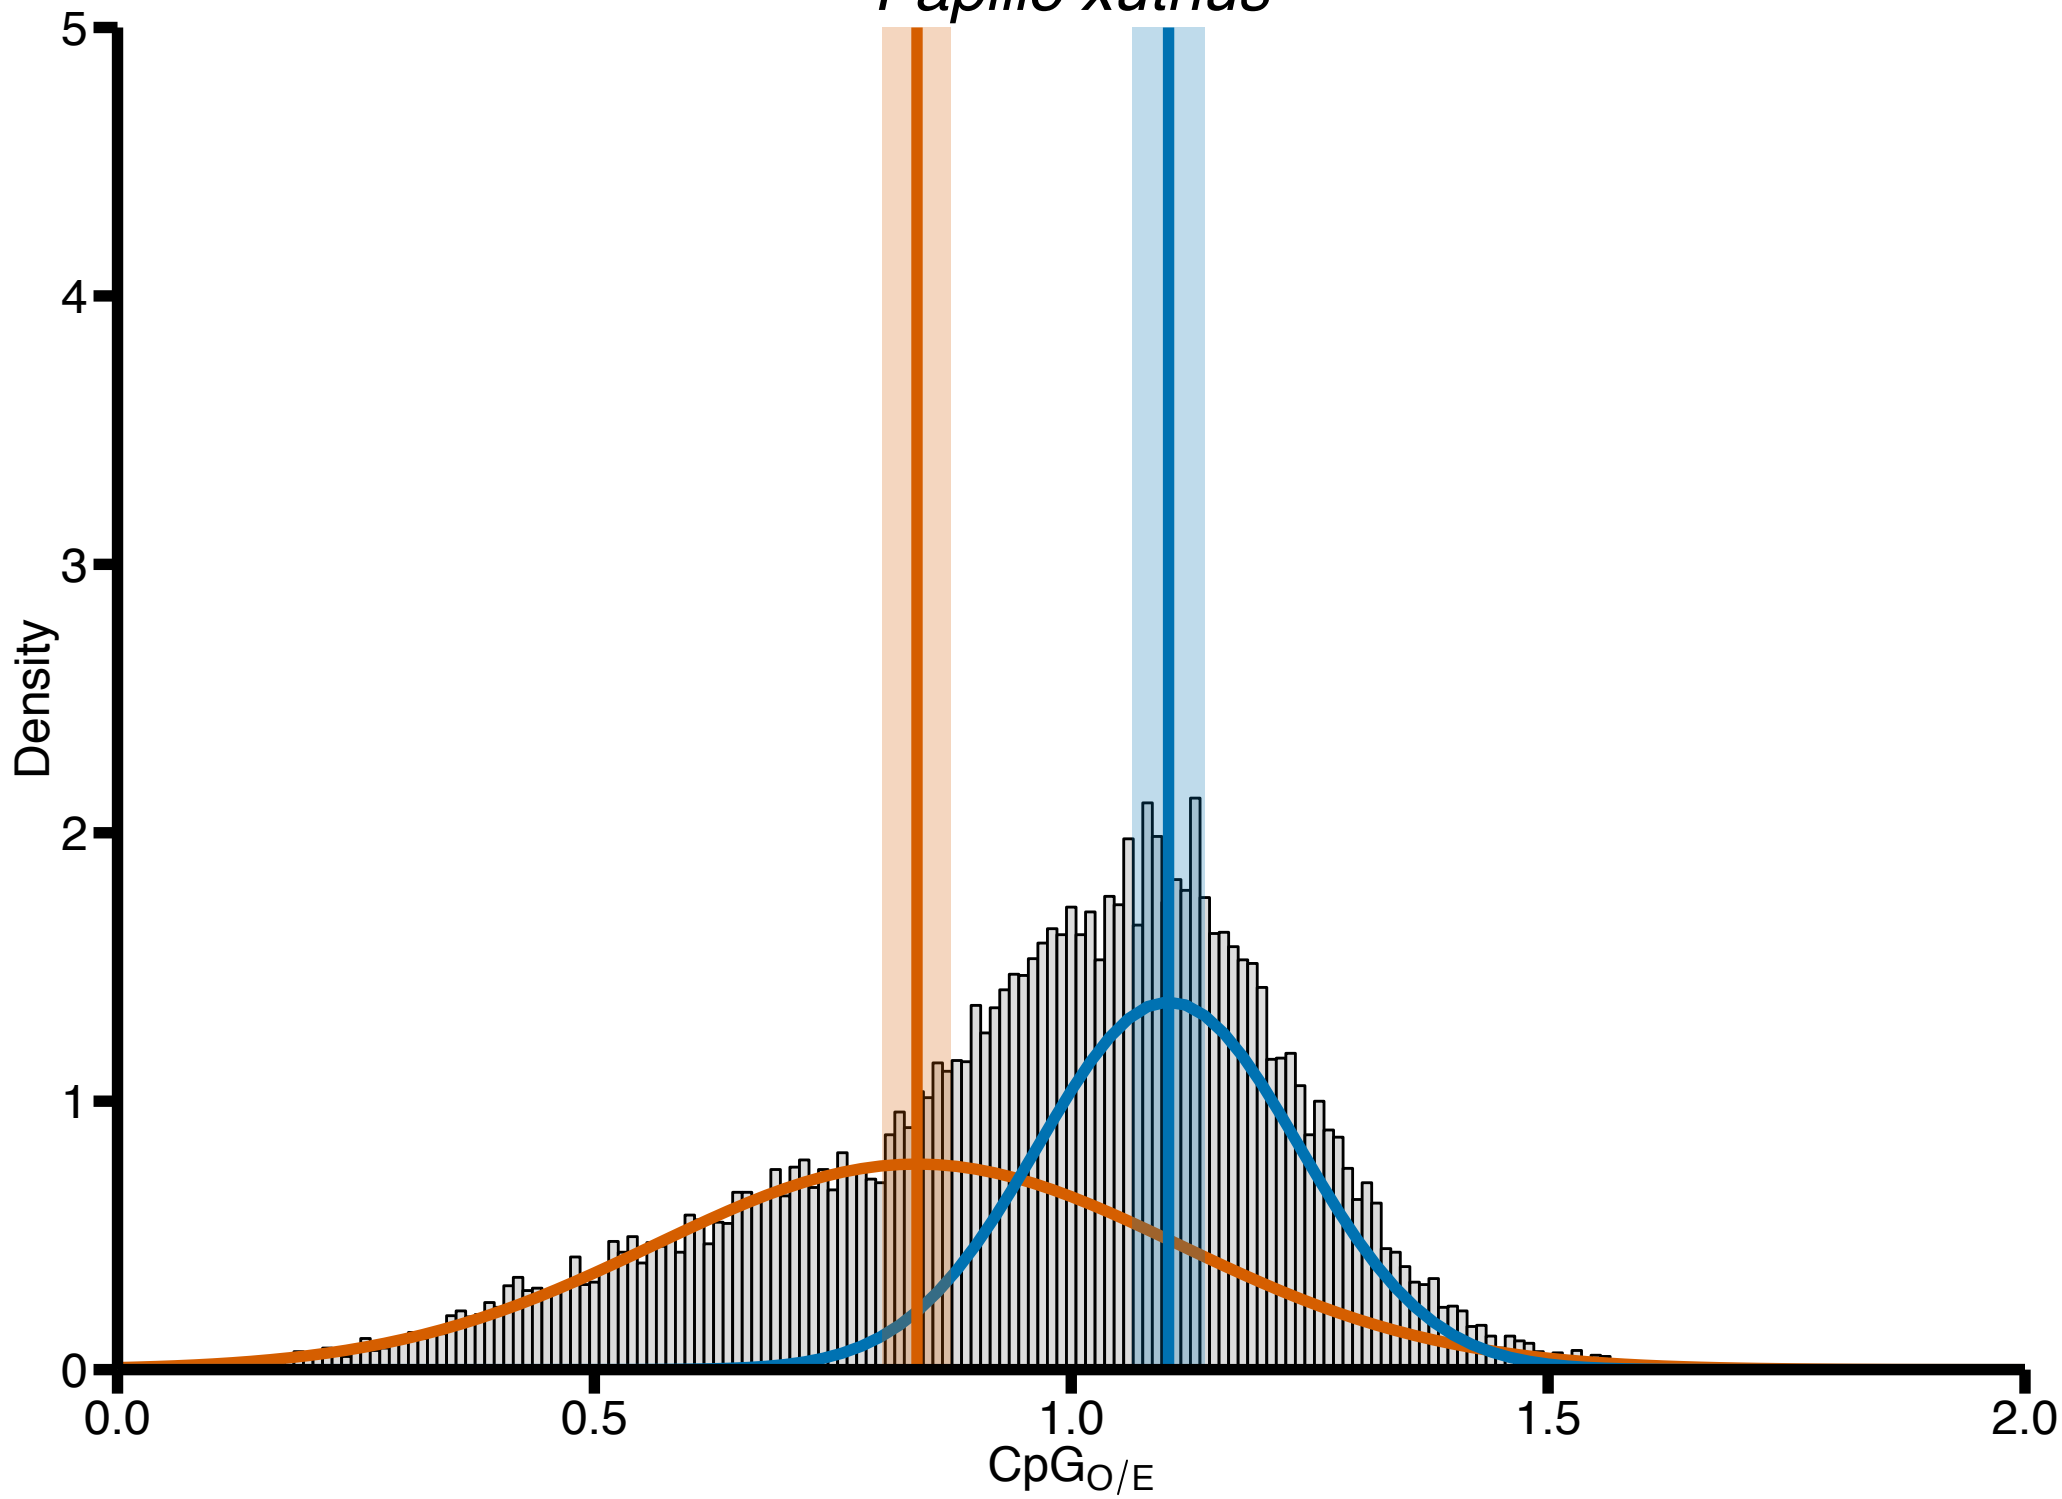

*Plutella xylostella*

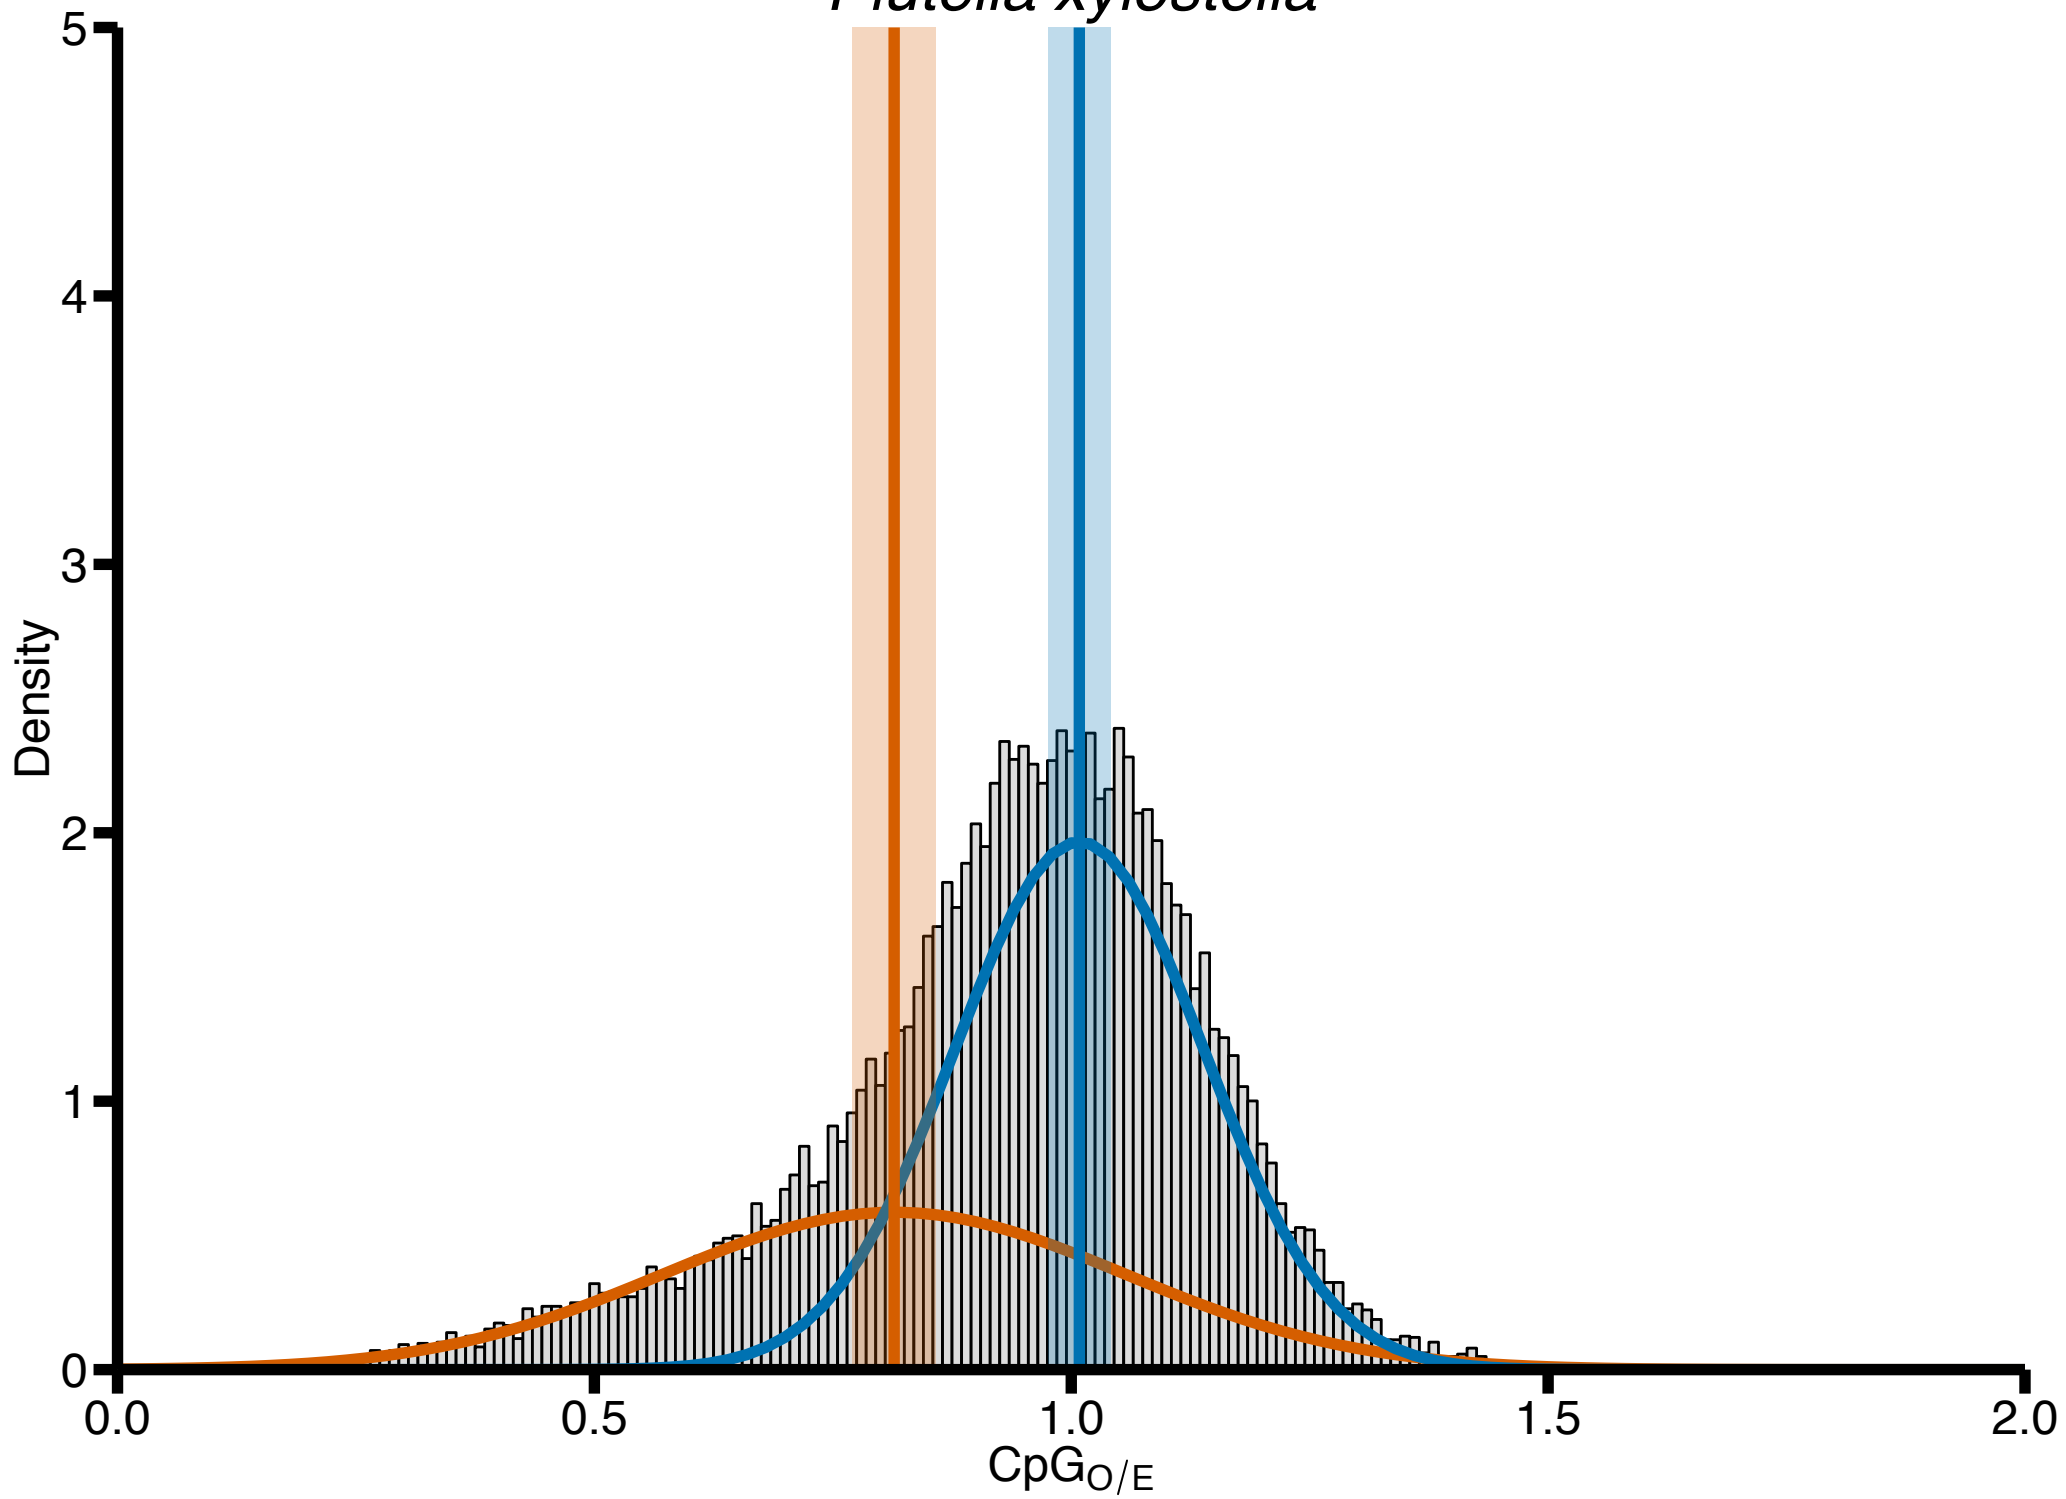

*Spodoptera frugiperda*

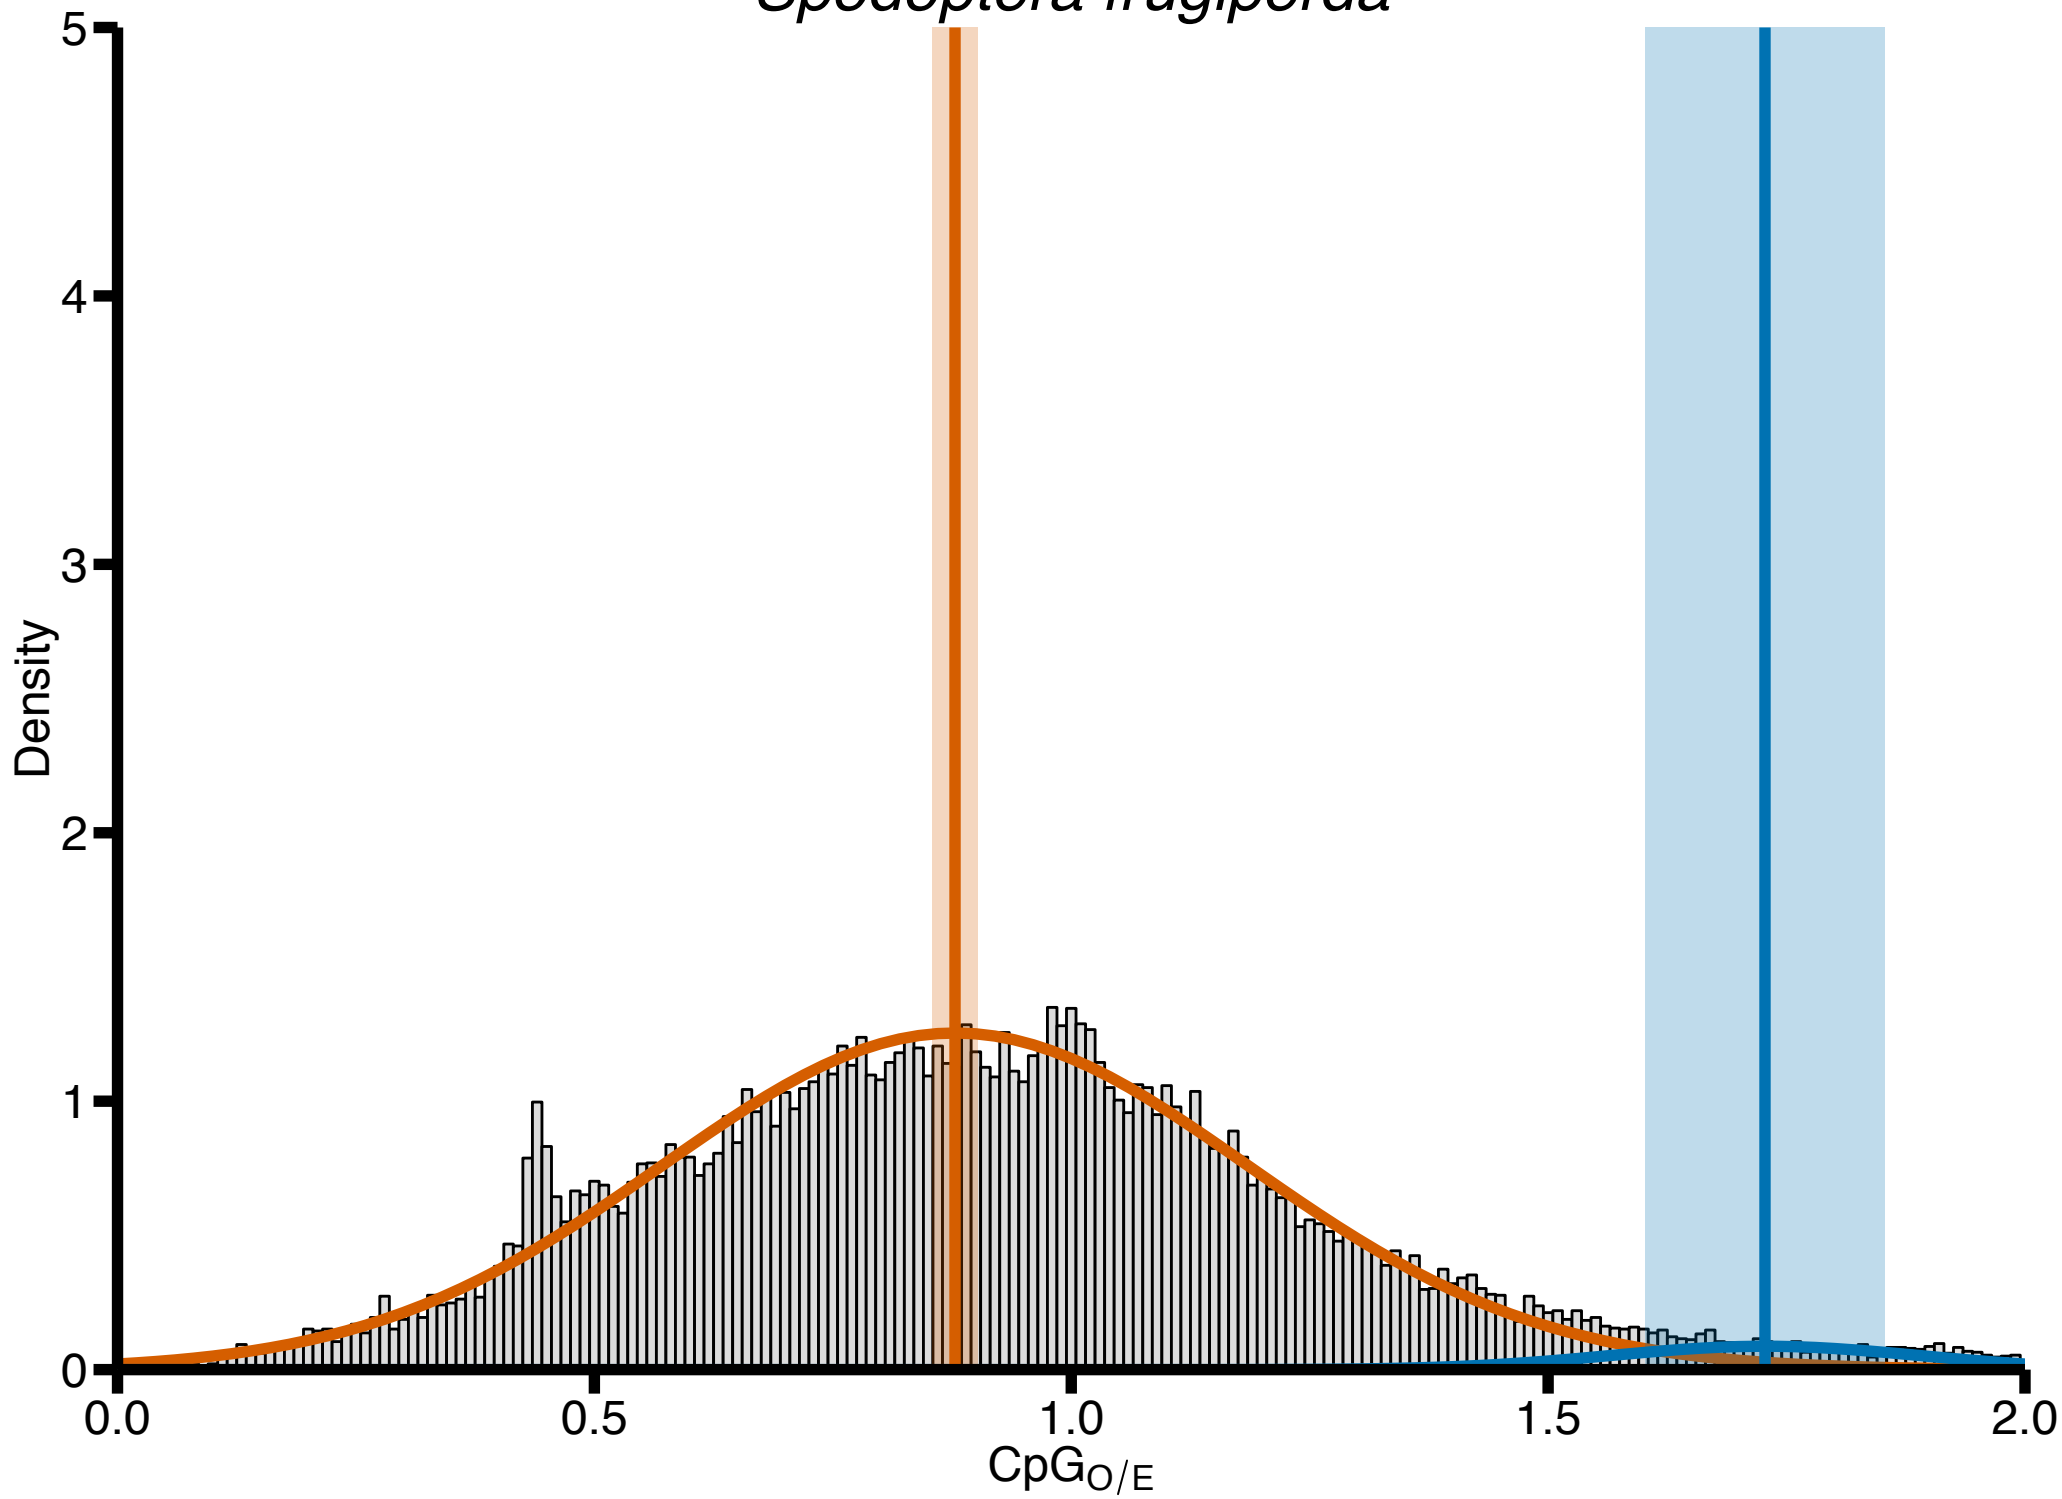



*Ladona fulva*

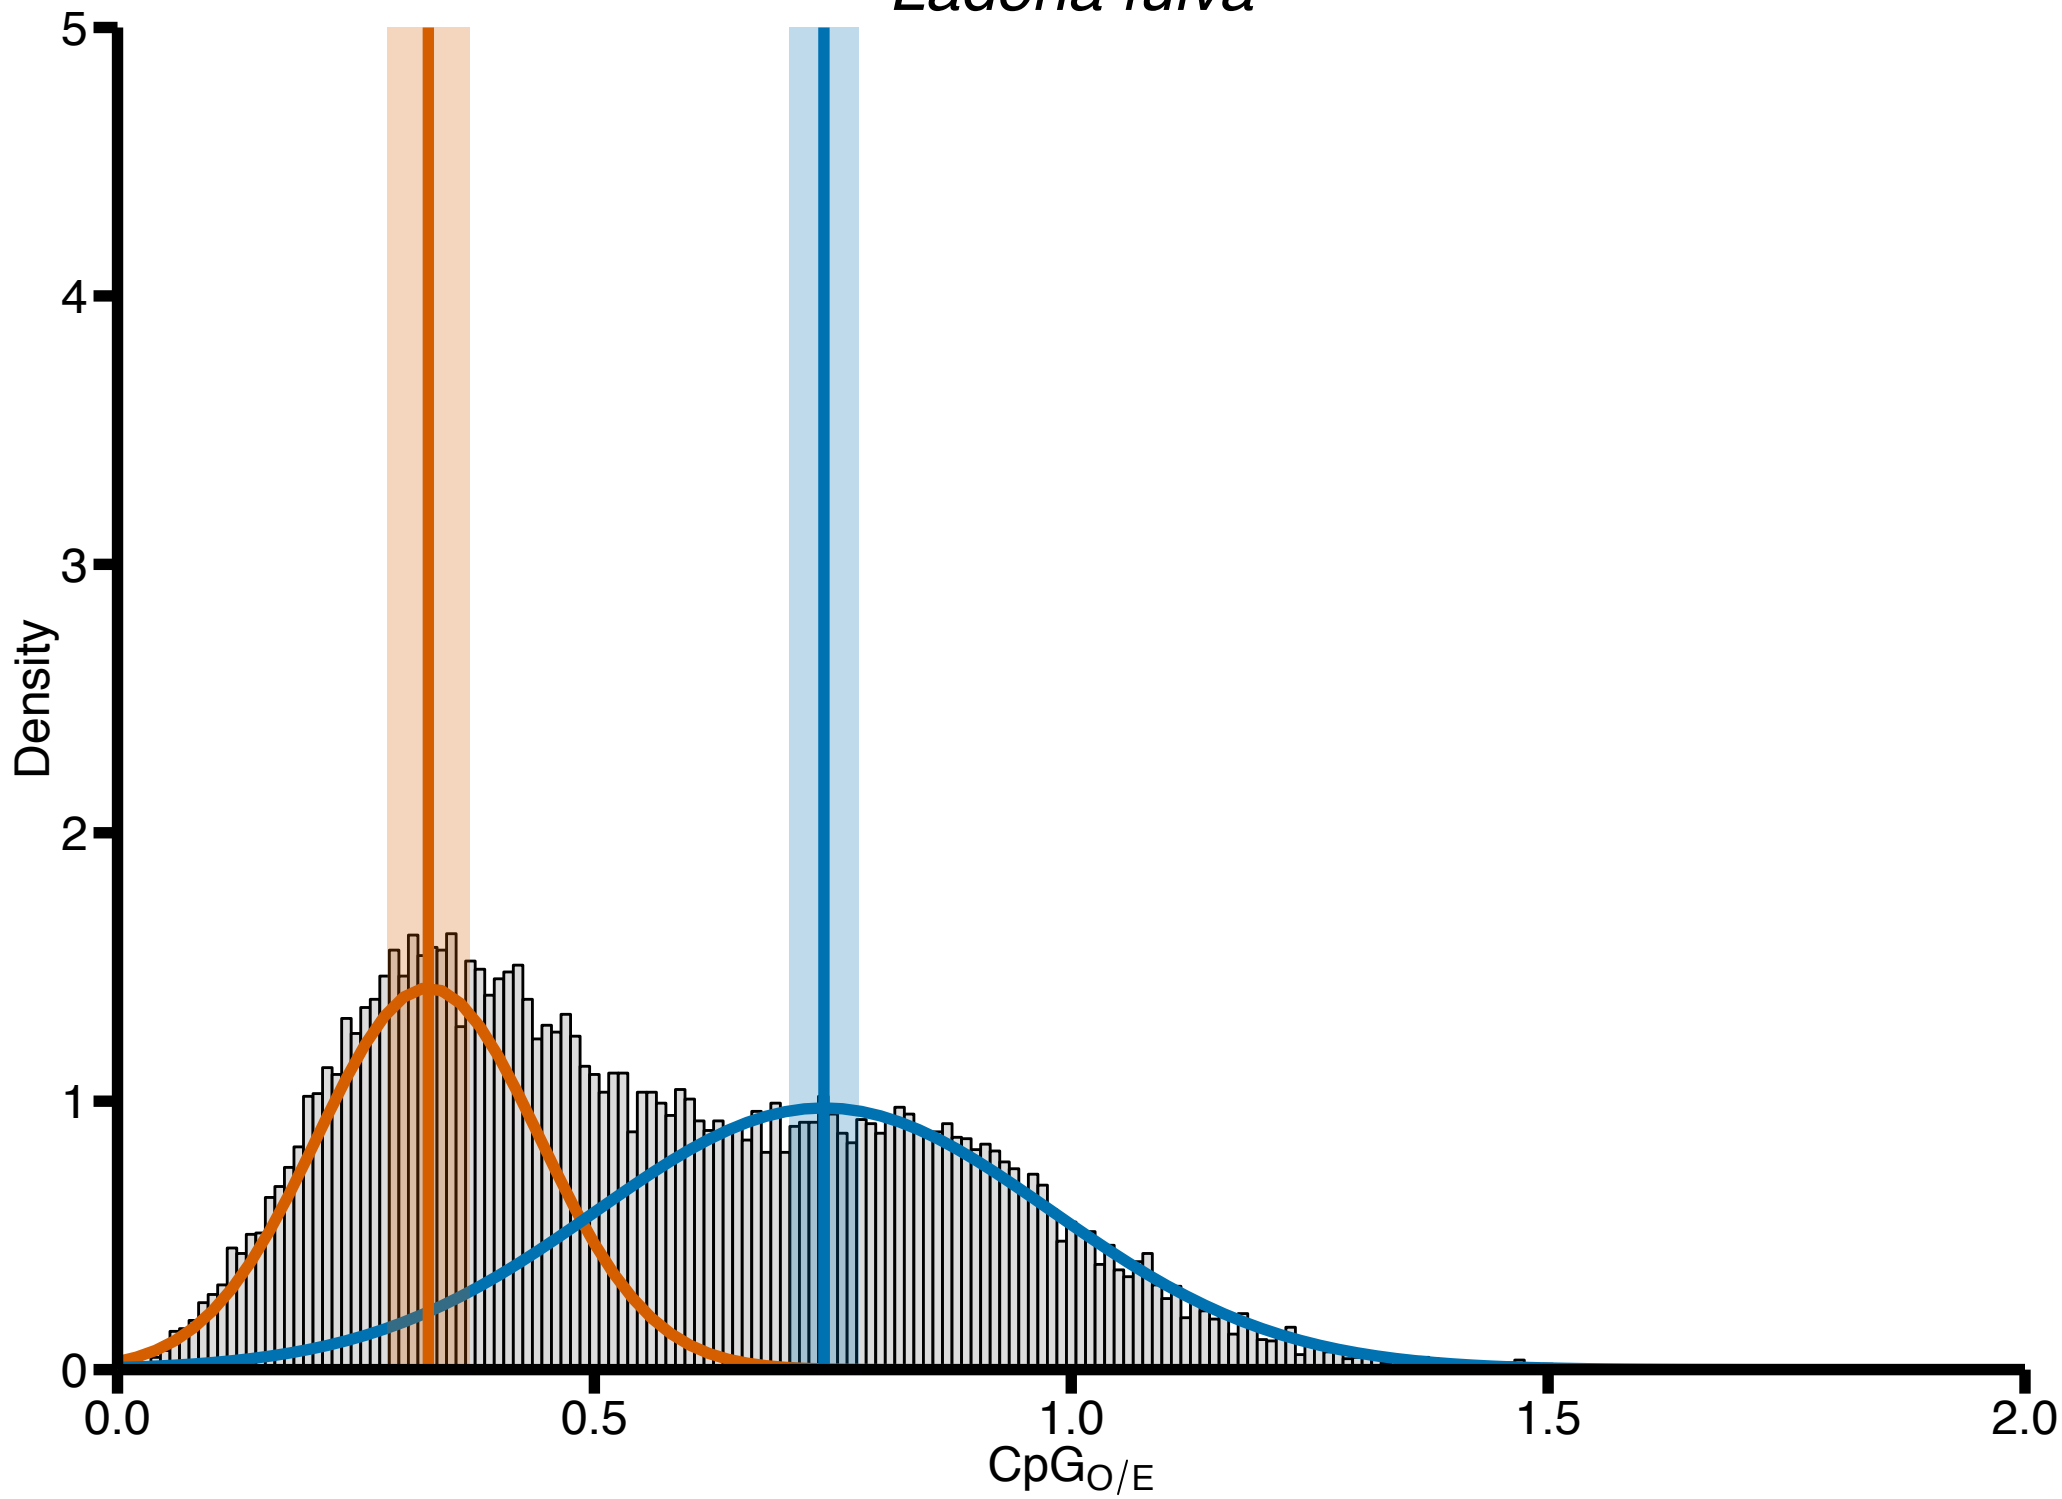

*Pediculus humanus corporis*

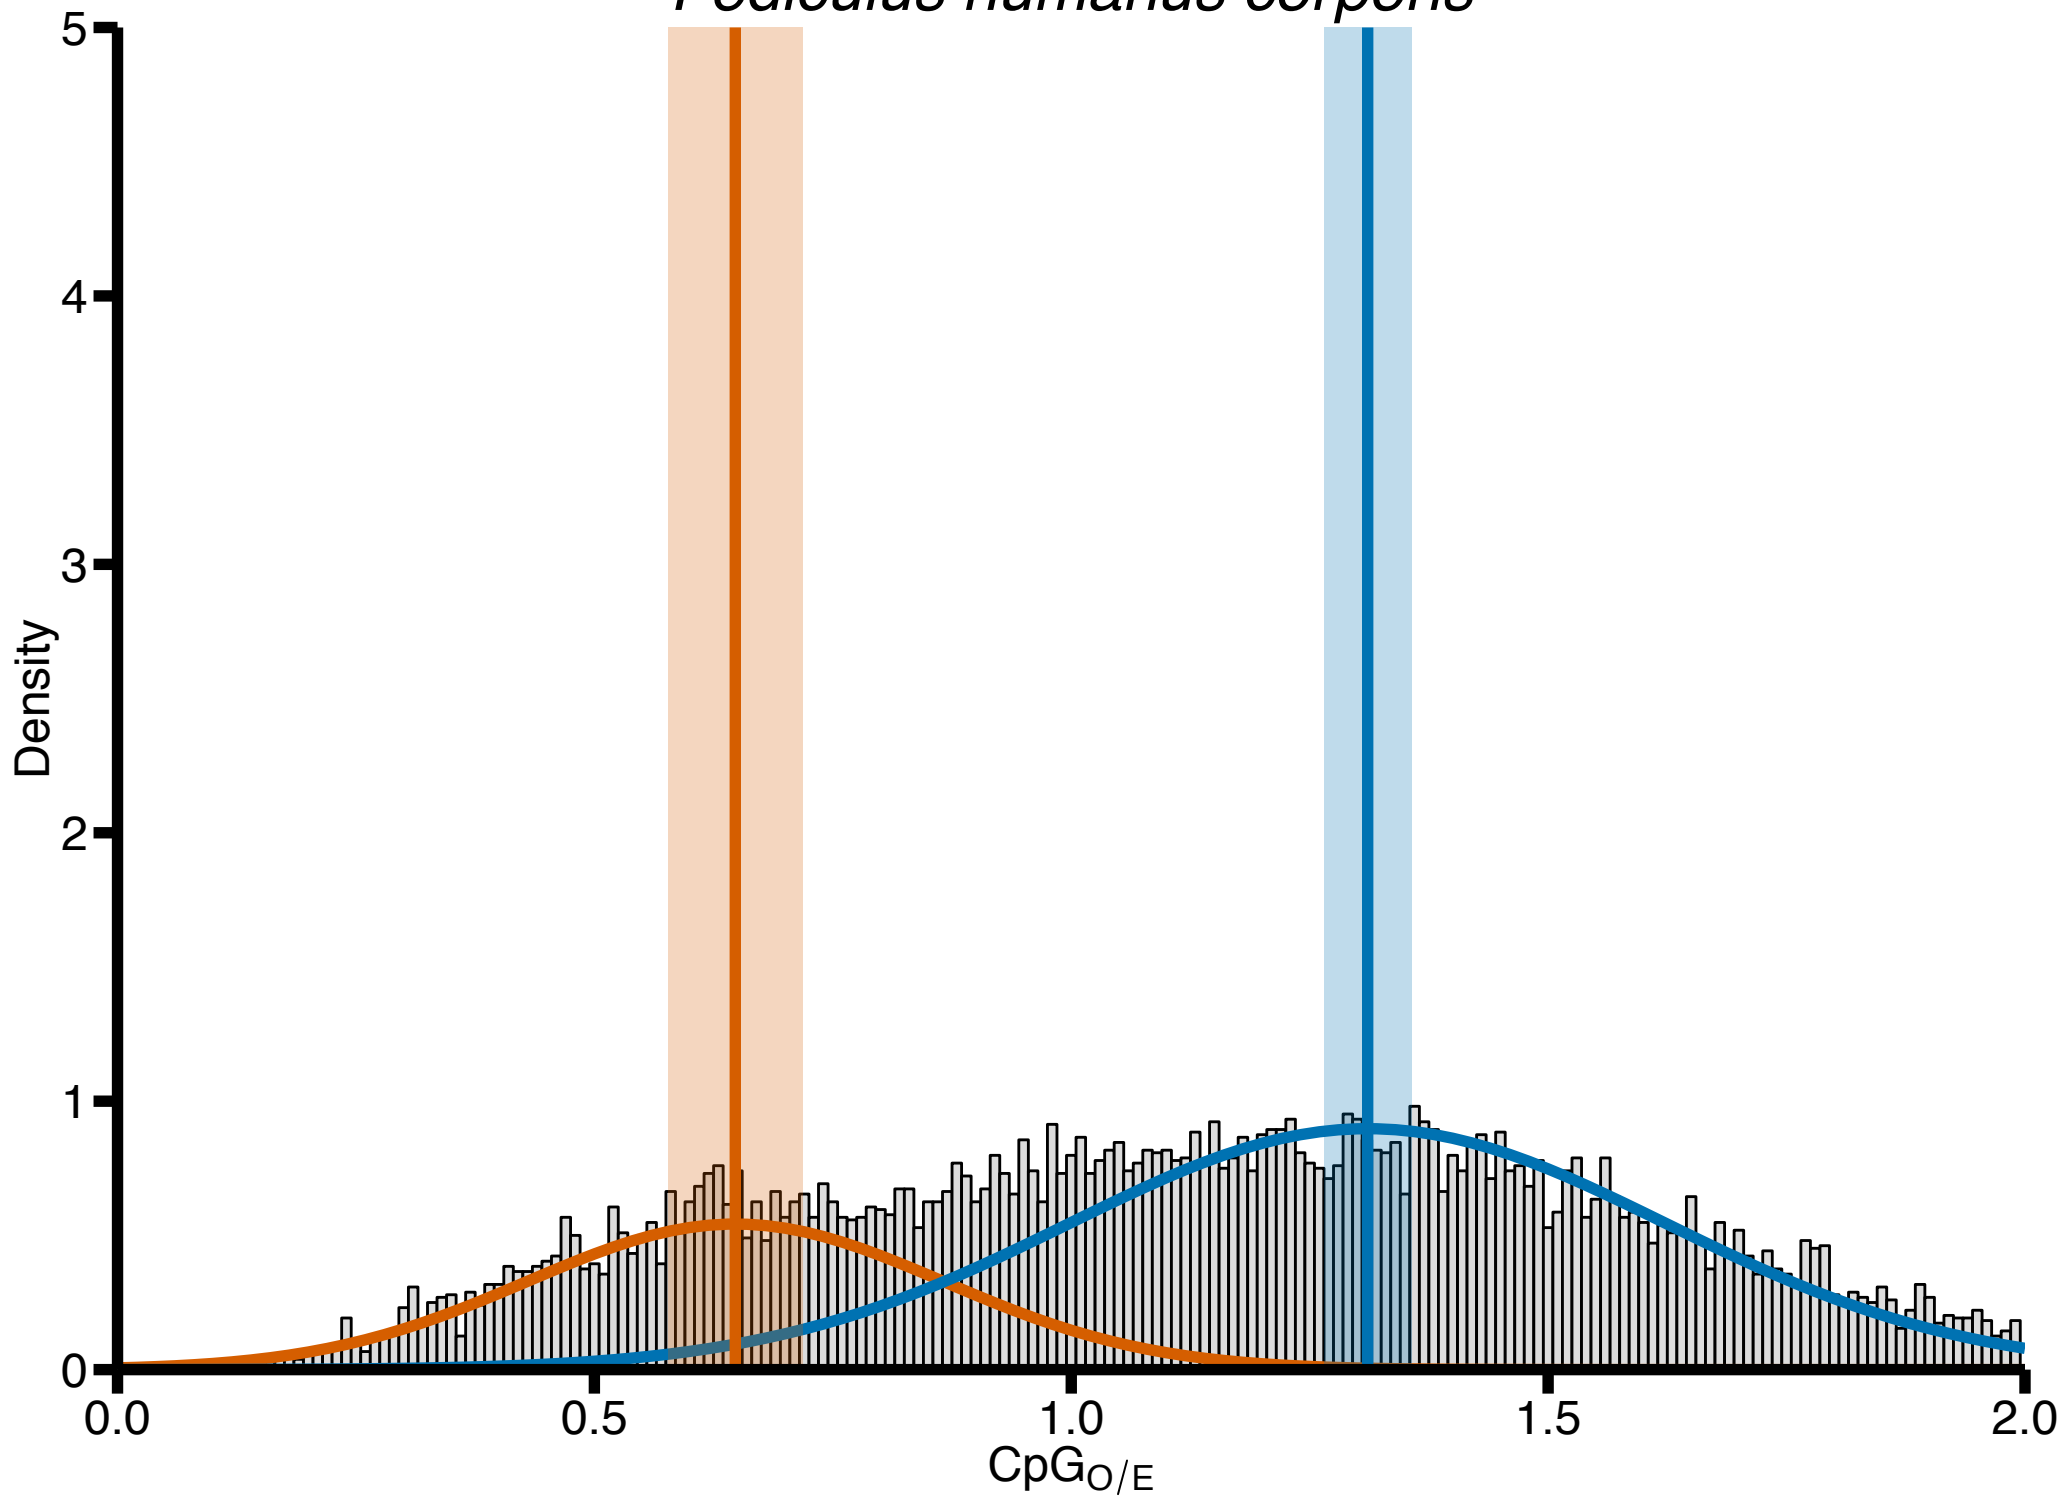

*Frankliniella occidentalis*

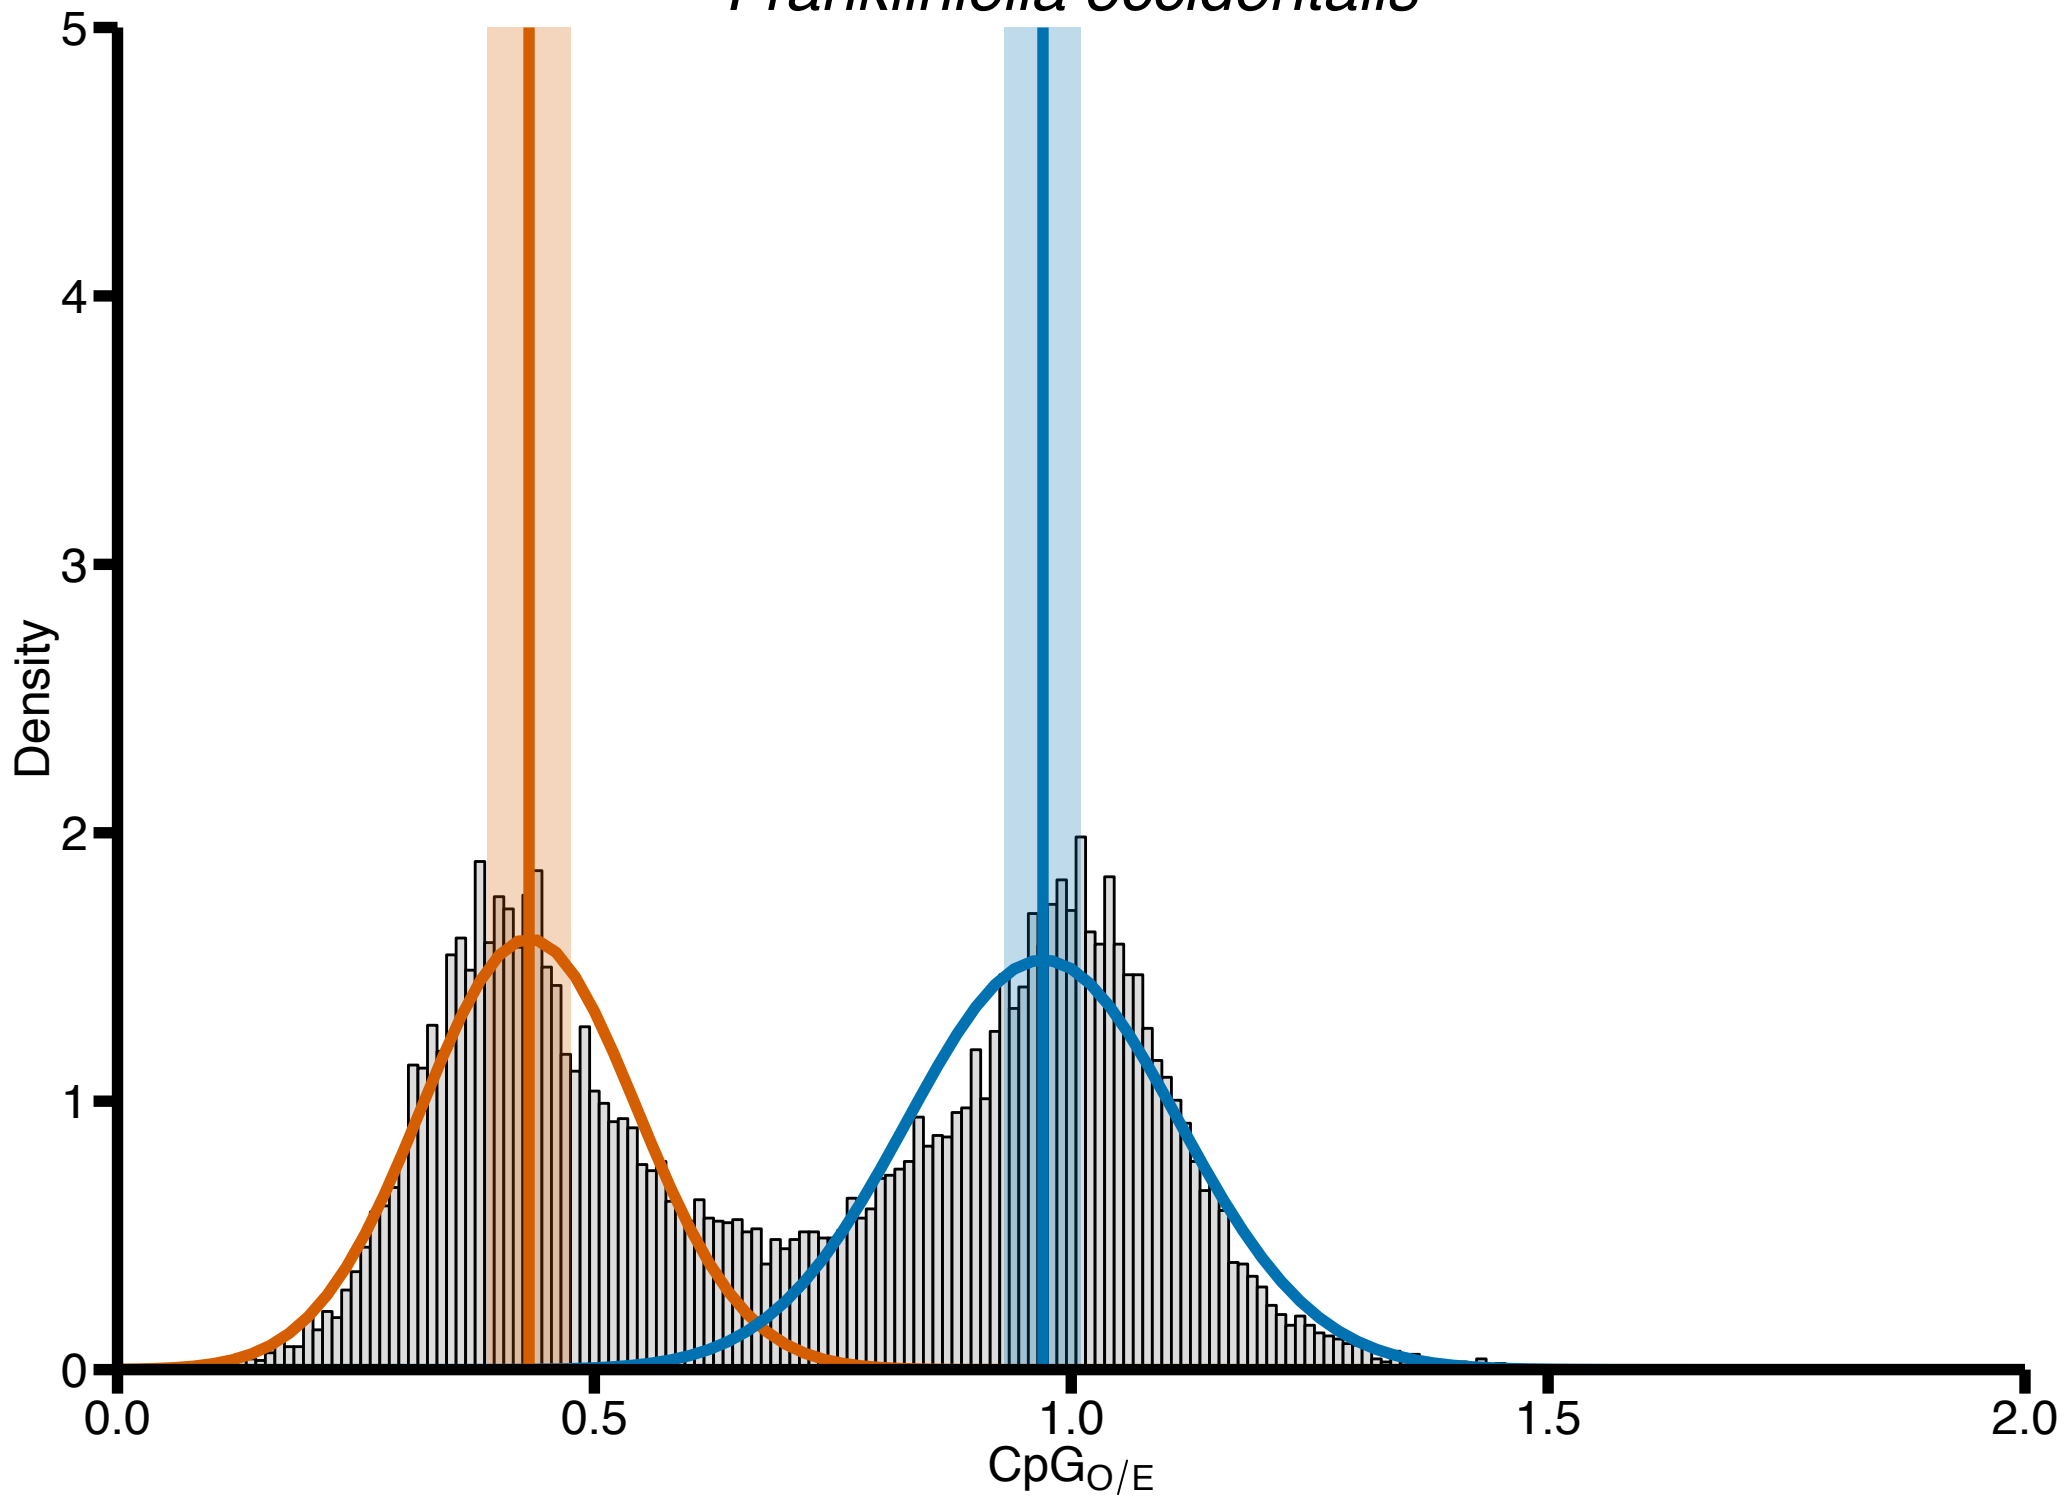

*Limnephilus lunatus*

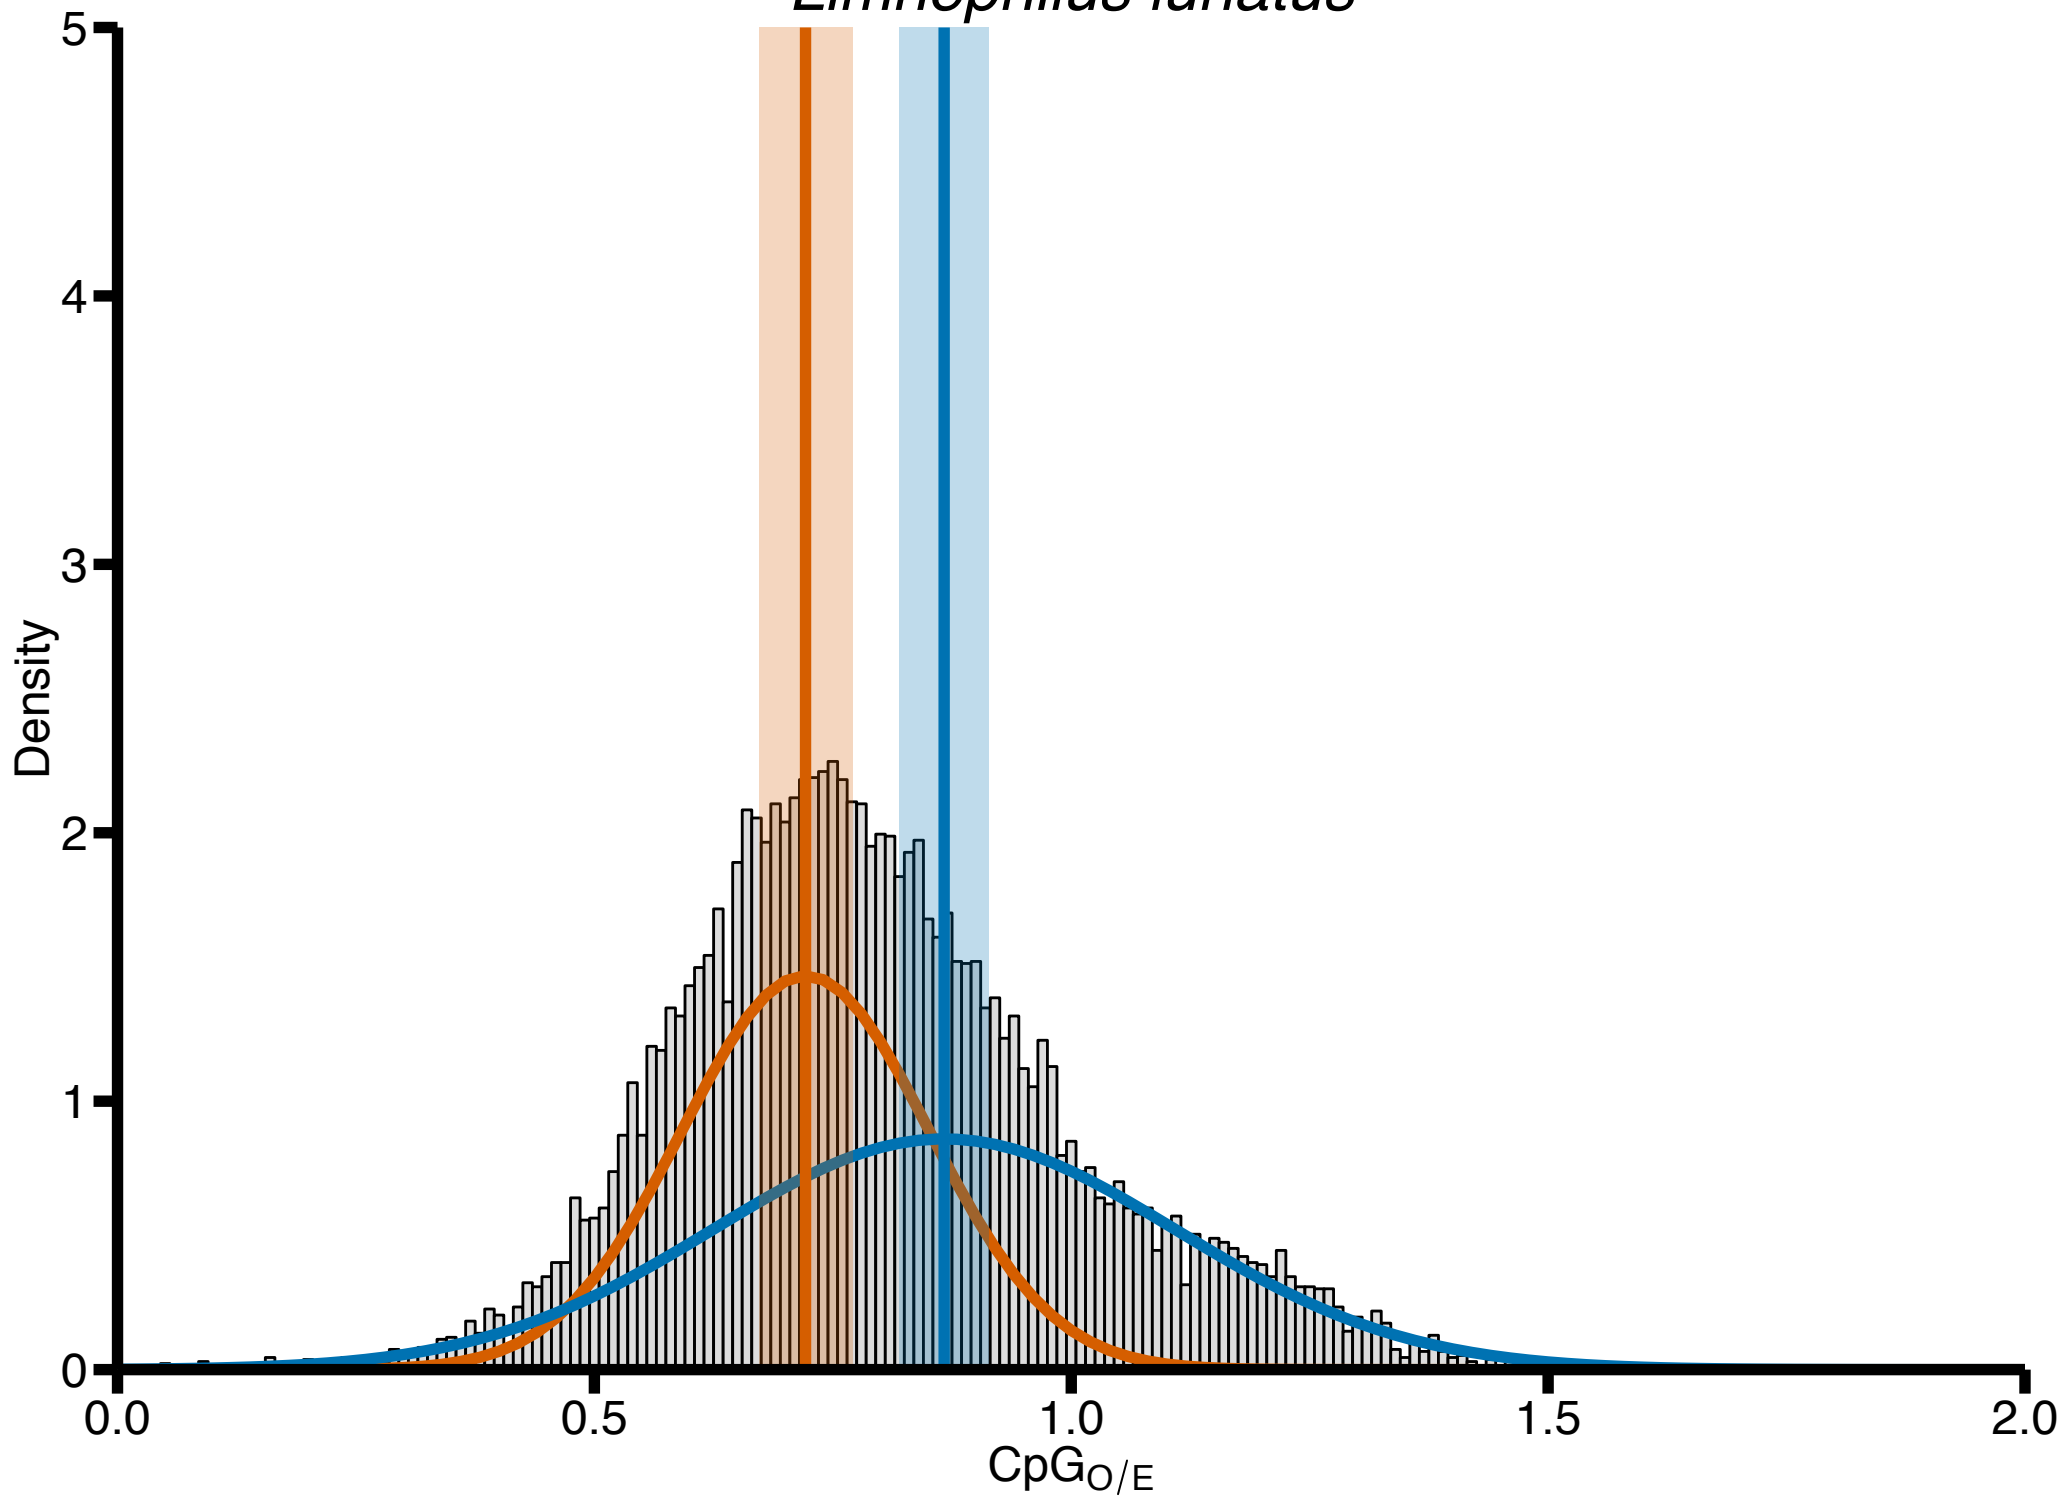

Supplement: Supplementary file [file 062455-1.pdf]
